# Supplementary material for: Genetic analysis of resistance to stripe rust in durum wheat (Triticum turgidum L. var. durum)
Source: PLoS One. 2018 Sep 19;13(9):e0203283. doi: 10.1371/journal.pone.0203283 (PMC6145575; doi:10.1371/journal.pone.0203283)
Supplement: S2 Appendix — (XLSX) [file pone.0203283.s015.xlsx]

## Sheet: S2 Appendix
S2 Appendix Exome sequence variants and their predicted effects on gene function.
Genomic Variants (Freebayes)						Variant Effects (SNPEff)
Chromosome	Position	Reference (REF)	Alternate (ALT1, ALT2, ….)	Kofa	W9262-260D3	Description	Predicted Effect	Gene	Detailed Information
chr7B	719487048	A	G	ALT1	REF	synonymous_variant	LOW	TRIDC7BG070820	AB=0.532934;ABP=6.15698;AC=107;AF=0.417969;AN=256;AO=691;CIGAR=1X;DP=2325;DPB=2325;DPRA=0.6955;EPP=17.9718;EPPR=3.35092;GTI=19;LEN=1;MEANALT=1.06897;MQM=67.4081;MQMR=70;NS=64;NUMALT=1;ODDS=0.162007;PAIRED=1;PAIREDR=1;PAO=0;PQA=0;PQR=0;PRO=0;QA=26387;QR=61572;RO=1632;RPL=362;RPP=6.43249;RPPR=144.417;RPR=329;RUN=1;SAF=347;SAP=3.03858;SAR=344;SRF=1261;SRP=1056.95;SRR=371;TYPE=snp;ANN=G|synonymous_va…
chr7B	719487147	A	G	ALT1	REF	synonymous_variant	LOW	TRIDC7BG070820	AB=0.578313;ABP=29.5389;AC=100;AF=0.390625;AN=256;AO=604;CIGAR=1X;DP=2741;DPB=2741;DPRA=0.543109;EPP=38.9618;EPPR=13.3759;GTI=21;LEN=1;MEANALT=1;MQM=69.3825;MQMR=70;NS=64;NUMALT=1;ODDS=0.032604;PAIRED=1;PAIREDR=1;PAO=0;PQA=0;PQR=0;PRO=0;QA=22944;QR=79768;RO=2137;RPL=335;RPP=18.6708;RPPR=6.0841;RPR=269;RUN=1;SAF=217;SAP=106.91;SAR=387;SRF=937;SRP=73.2951;SRR=1200;TYPE=snp;ANN=G|synonymous_variant|…
chr7B	719487827	G	T	ALT1	REF	missense_variant	MODERATE	TRIDC7BG070820	AB=0.44389;ABP=13.976;AC=105;AF=0.410156;AN=256;AO=400;CIGAR=1X;DP=1943;DPB=1943;DPRA=0.569619;EPP=115.579;EPPR=199.316;GTI=24;LEN=1;MEANALT=1.06897;MQM=70;MQMR=70;NS=64;NUMALT=1;ODDS=0.498914;PAIRED=1;PAIREDR=1;PAO=0;PQA=0;PQR=0;PRO=0;QA=15263;QR=57901;RO=1539;RPL=250;RPP=57.2971;RPPR=165.16;RPR=150;RUN=1;SAF=138;SAP=86.4817;SAR=262;SRF=455;SRP=561.245;SRR=1084;TYPE=snp;ANN=T|missense_variant|MO…
chr7B	719487842	A	C	REF	ALT1	missense_variant	MODERATE	TRIDC7BG070820	AB=0.520988;ABP=4.55982;AC=150;AF=0.585938;AN=256;AO=1534;CIGAR=1X;DP=2008;DPB=2008;DPRA=3.50559;EPP=492.432;EPPR=265.244;GTI=25;LEN=1;MEANALT=1.02439;MQM=69.9974;MQMR=70;NS=64;NUMALT=1;ODDS=0.247955;PAIRED=1;PAIREDR=1;PAO=0;PQA=0;PQR=0;PRO=0;QA=58093;QR=18033;RO=473;RPL=781;RPP=4.1201;RPPR=13.1515;RPR=753;RUN=1;SAF=644;SAP=88.6745;SAR=890;SRF=216;SRP=10.7275;SRR=257;TYPE=snp;ANN=C|missense_varia…
chr7B	719487857	G	A	ALT1	REF	missense_variant	MODERATE	TRIDC7BG070820	AB=0.4375;ABP=13.3248;AC=106;AF=0.414062;AN=256;AO=395;CIGAR=1X;DP=1846;DPB=1846;DPRA=0.521835;EPP=128.356;EPPR=431.356;GTI=25;LEN=1;MEANALT=1;MQM=70;MQMR=69.9821;NS=64;NUMALT=1;ODDS=0.415925;PAIRED=1;PAIREDR=1;PAO=0;PQA=0;PQR=0;PRO=0;QA=14712;QR=55138;RO=1451;RPL=137;RPP=83.4977;RPPR=195.885;RPR=258;RUN=1;SAF=286;SAP=175.238;SAR=109;SRF=823;SRP=59.916;SRR=628;TYPE=snp;ANN=A|missense_variant|MODE…
chr7B	719488872	G	C	ALT1	REF	synonymous_variant	LOW	TRIDC7BG070820	AB=0.473418;ABP=5.43465;AC=105;AF=0.410156;AN=256;AO=636;CIGAR=1X;DP=2348;DPB=2348;DPRA=0.668337;EPP=9.62032;EPPR=46.8913;GTI=18;LEN=1;MEANALT=1;MQM=70;MQMR=69.8984;NS=64;NUMALT=1;ODDS=0.0879062;PAIRED=1;PAIREDR=1;PAO=0;PQA=0;PQR=0;PRO=0;QA=23832;QR=61722;RO=1712;RPL=280;RPP=22.7311;RPPR=55.7953;RPR=356;RUN=1;SAF=440;SAP=206.282;SAR=196;SRF=1061;SRP=216.226;SRR=651;TYPE=snp;ANN=C|synonymous_varia…
chr7B	719488943	TA	CT,CA	ALT2	ALT1	5_prime_UTR_variant	MODIFIER	TRIDC7BG070820	AB=0.599502,0.39801;ABP=37.581,39.3311;AC=145,111;AF=0.566406,0.433594;AN=256;AO=1594,726;CIGAR=2X,1X1M;DP=2328;DPB=2331;DPRA=2.06669,0.738971;EPP=43.312,44.6571;EPPR=0;GTI=10;LEN=2,1;MEANALT=1.36585,1.42424;MQM=70,70;MQMR=0;NS=64;NUMALT=2;ODDS=4231.55;PAIRED=1,1;PAIREDR=0;PAO=0,3;PQA=0,0;PQR=0;PRO=3;QA=56293,24852;QR=0;RO=0;RPL=883,380;RPP=43.312,6.46791;RPPR=0;RPR=711,346;RUN=1,1;SAF=860,360;SA…
chr7B	719489148	A	G	REF	ALT1	synonymous_variant	LOW	TRIDC7BG070820	AB=0.450142;ABP=10.5888;AC=146;AF=0.570312;AN=256;AO=1586;CIGAR=1X;DP=2501;DPB=2501;DPRA=1.52372;EPP=3.09793;EPPR=10.7208;GTI=17;LEN=1;MEANALT=1;MQM=69.959;MQMR=70;NS=64;NUMALT=1;ODDS=0.0532922;PAIRED=1;PAIREDR=1;PAO=0;PQA=0;PQR=0;PRO=0;QA=58765;QR=33876;RO=915;RPL=694;RPP=56.6865;RPPR=57.1215;RPR=892;RUN=1;SAF=847;SAP=18.9801;SAR=739;SRF=442;SRP=5.29094;SRR=473;TYPE=snp;ANN=G|synonymous_variant|…
chr7B	719489166	G	A	REF	ALT1	synonymous_variant	LOW	TRIDC7BG070820	AB=0.469055;ABP=5.56373;AC=146;AF=0.570312;AN=256;AO=1649;CIGAR=1X;DP=2591;DPB=2591;DPRA=1.51247;EPP=9.6485;EPPR=13.073;GTI=8;LEN=1;MEANALT=1.02439;MQM=69.9751;MQMR=70;NS=64;NUMALT=1;ODDS=0.217684;PAIRED=1;PAIREDR=1;PAO=0;PQA=0;PQR=0;PRO=0;QA=60283;QR=35249;RO=940;RPL=670;RPP=128.744;RPPR=9.74648;RPR=979;RUN=1;SAF=865;SAP=11.6501;SAR=784;SRF=458;SRP=4.3409;SRR=482;TYPE=snp;ANN=A|synonymous_varian…
chr7B	719489463	G	C	ALT1	REF	missense_variant	MODERATE	TRIDC7BG070820	AB=0.448485;ABP=6.81367;AC=106;AF=0.414062;AN=256;AO=286;CIGAR=1X;DP=1172;DPB=1172;DPRA=0.537442;EPP=3.28363;EPPR=16.0858;GTI=38;LEN=1;MEANALT=1;MQM=70;MQMR=70;NS=64;NUMALT=1;ODDS=0.0137136;PAIRED=1;PAIREDR=1;PAO=0;PQA=0;PQR=0;PRO=0;QA=10946;QR=33537;RO=885;RPL=167;RPP=20.5036;RPPR=90.6568;RPR=119;RUN=1;SAF=27;SAP=411.672;SAR=259;SRF=139;SRP=907.052;SRR=746;TYPE=snp;ANN=C|missense_variant|MODERAT…
chr7B	719498830	TA	TGA	REF	ALT1	intergenic_region	MODIFIER	TRIDC7BG070820-TRIDC7BG070830	AB=0.272727;ABP=32.6213;AC=91;AF=0.455;AN=200;AO=110;CIGAR=1M1I1M;DP=259;DPB=329;DPRA=1.46769;EPP=5.85295;EPPR=20.863;GTI=25;LEN=1;MEANALT=1;MQM=58.0636;MQMR=62.7651;NS=50;NUMALT=1;ODDS=0.098886;PAIRED=1;PAIREDR=1;PAO=14.5;PQA=457;PQR=457;PRO=14.5;QA=4049;QR=5411;RO=149;RPL=48;RPP=6.87947;RPPR=4.19076;RPR=62;RUN=1;SAF=63;SAP=8.06391;SAR=47;SRF=104;SRP=53.7411;SRR=45;TYPE=ins;ANN=TGA|intergenic_re…
chr7B	719499007	T	C	REF	ALT1	intergenic_region	MODIFIER	TRIDC7BG070820-TRIDC7BG070830	AB=0.462963;ABP=3.6537;AC=138;AF=0.565574;AN=244;AO=225;CIGAR=1X;DP=368;DPB=368;DPRA=1.54727;EPP=28.1125;EPPR=23.7987;GTI=21;LEN=1;MEANALT=1;MQM=67.6222;MQMR=70;NS=61;NUMALT=1;ODDS=0.0519502;PAIRED=1;PAIREDR=1;PAO=0;PQA=0;PQR=0;PRO=0;QA=8540;QR=5439;RO=143;RPL=101;RPP=8.11567;RPPR=8.49213;RPR=124;RUN=1;SAF=157;SAP=79.4558;SAR=68;SRF=96;SRP=39.4698;SRR=47;TYPE=snp;ANN=C|intergenic_region|MODIFIER|…
chr7B	719499455	A	G	REF	ALT1	intergenic_region	MODIFIER	TRIDC7BG070820-TRIDC7BG070830	AB=0.371951;ABP=26.3669;AC=138;AF=0.565574;AN=244;AO=384;CIGAR=1X;DP=600;DPB=600;DPRA=2.39167;EPP=61.8436;EPPR=25.5304;GTI=24;LEN=1;MEANALT=1.025;MQM=49.2917;MQMR=69.9531;NS=61;NUMALT=1;ODDS=0.191029;PAIRED=1;PAIREDR=1;PAO=0;PQA=0;PQR=0;PRO=0;QA=14279;QR=7848;RO=213;RPL=221;RPP=22.0333;RPPR=5.30411;RPR=163;RUN=1;SAF=220;SAP=20.744;SAR=164;SRF=131;SRP=27.4878;SRR=82;TYPE=snp;ANN=G|intergenic_regio…
chr7B	719499523	A	G	REF	ALT1	intergenic_region	MODIFIER	TRIDC7BG070820-TRIDC7BG070830	AB=0.392857;ABP=16.9698;AC=135;AF=0.581897;AN=232;AO=326;CIGAR=1X;DP=548;DPB=548;DPRA=1.83333;EPP=77.8528;EPPR=56.5733;GTI=22;LEN=1;MEANALT=1;MQM=54.8558;MQMR=69.5541;NS=58;NUMALT=1;ODDS=0.314874;PAIRED=1;PAIREDR=1;PAO=0;PQA=0;PQR=0;PRO=0;QA=12521;QR=8140;RO=222;RPL=129;RPP=33.8106;RPPR=21.9471;RPR=197;RUN=1;SAF=57;SAP=302.38;SAR=269;SRF=75;SRP=53.7171;SRR=147;TYPE=snp;ANN=G|intergenic_region|MOD…
chr7B	719499528	G	A	REF	ALT1	intergenic_region	MODIFIER	TRIDC7BG070820-TRIDC7BG070830	AB=0.422535;ABP=10.4117;AC=127;AF=0.566964;AN=224;AO=304;CIGAR=1X;DP=530;DPB=530;DPRA=1.78515;EPP=71.6117;EPPR=16.8847;GTI=26;LEN=1;MEANALT=1;MQM=56.3257;MQMR=68.4204;NS=56;NUMALT=1;ODDS=0.0677725;PAIRED=1;PAIREDR=1;PAO=0;PQA=0;PQR=0;PRO=0;QA=11600;QR=8482;RO=226;RPL=218;RPP=127.47;RPPR=55.6253;RPR=86;RUN=1;SAF=55;SAP=271.844;SAR=249;SRF=76;SRP=55.6253;SRR=150;TYPE=snp;ANN=A|intergenic_region|MOD…
chr7B	719499623	G	A	REF	ALT1	intergenic_region	MODIFIER	TRIDC7BG070820-TRIDC7BG070830	AB=0.28972;ABP=44.1059;AC=140;AF=0.564516;AN=248;AO=302;CIGAR=1X;DP=568;DPB=568;DPRA=1.35493;EPP=3.47048;EPPR=13.5901;GTI=13;LEN=1;MEANALT=1;MQM=34.8113;MQMR=69.4323;NS=62;NUMALT=1;ODDS=0.187082;PAIRED=1;PAIREDR=1;PAO=0;PQA=0;PQR=0;PRO=0;QA=11451;QR=10102;RO=266;RPL=201;RPP=74.9134;RPPR=20.2841;RPR=101;RUN=1;SAF=194;SAP=56.1898;SAR=108;SRF=191;SRP=112.857;SRR=75;TYPE=snp;ANN=A|intergenic_region|M…
chr7B	719499674	A	G	REF	ALT1	intergenic_region	MODIFIER	TRIDC7BG070820-TRIDC7BG070830	AB=0.177778;ABP=43.5927;AC=124;AF=0.525424;AN=236;AO=125;CIGAR=1X;DP=561;DPB=561;DPRA=0.583876;EPP=13.8677;EPPR=12.2403;GTI=42;LEN=1;MEANALT=1.02857;MQM=21.064;MQMR=69.292;NS=59;NUMALT=1;ODDS=1.00011;PAIRED=1;PAIREDR=1;PAO=0;PQA=0;PQR=0;PRO=0;QA=4606;QR=16178;RO=435;RPL=88;RPP=48.1943;RPPR=13.1189;RPR=37;RUN=1;SAF=78;SAP=19.7046;SAR=47;SRF=311;SRP=177.572;SRR=124;TYPE=snp;ANN=G|intergenic_region|…
chr7B	719499693	G	C	REF	ALT1	intergenic_region	MODIFIER	TRIDC7BG070820-TRIDC7BG070830	AB=0.190083;ABP=103.957;AC=138;AF=0.556452;AN=248;AO=218;CIGAR=1X;DP=697;DPB=697;DPRA=0.686417;EPP=6.23763;EPPR=17.2566;GTI=26;LEN=1;MEANALT=1;MQM=34.5505;MQMR=68.8912;NS=62;NUMALT=1;ODDS=0.0954079;PAIRED=1;PAIREDR=1;PAO=0;PQA=0;PQR=0;PRO=0;QA=7853;QR=18078;RO=478;RPL=37;RPP=209.559;RPPR=18.2924;RPR=181;RUN=1;SAF=125;SAP=13.2102;SAR=93;SRF=321;SRP=125.194;SRR=157;TYPE=snp;ANN=C|intergenic_region|…
chr7B	719499749	A	G	REF	ALT1	intergenic_region	MODIFIER	TRIDC7BG070820-TRIDC7BG070830	AB=0.306533;ABP=67.7071;AC=141;AF=0.559524;AN=252;AO=447;CIGAR=1X;DP=1037;DPB=1037;DPRA=0.854826;EPP=4.76399;EPPR=24.341;GTI=23;LEN=1;MEANALT=1.02632;MQM=36.3244;MQMR=69.2381;NS=63;NUMALT=1;ODDS=0.0952458;PAIRED=1;PAIREDR=1;PAO=0;PQA=0;PQR=0;PRO=0;QA=16696;QR=21705;RO=588;RPL=212;RPP=5.58012;RPPR=3.3796;RPR=235;RUN=1;SAF=258;SAP=26.1387;SAR=189;SRF=327;SRP=19.0969;SRR=261;TYPE=snp;ANN=G|intergeni…
chr7B	719499767	T	C	ALT1	REF	intergenic_region	MODIFIER	TRIDC7BG070820-TRIDC7BG070830	AB=0.671642;ABP=54.445;AC=110;AF=0.436508;AN=252;AO=547;CIGAR=1X;DP=1068;DPB=1068;DPRA=1.48767;EPP=65.0382;EPPR=5.83321;GTI=21;LEN=1;MEANALT=1.03333;MQM=69.574;MQMR=36.9635;NS=63;NUMALT=1;ODDS=0.195138;PAIRED=1;PAIREDR=1;PAO=0;PQA=0;PQR=0;PRO=0;QA=20213;QR=18951;RO=520;RPL=295;RPP=10.3504;RPPR=3.42789;RPR=252;RUN=1;SAF=280;SAP=3.68119;SAR=267;SRF=278;SRP=8.42228;SRR=242;TYPE=snp;ANN=C|intergenic_…
chr7B	719499792	T	A	REF	ALT1	intergenic_region	MODIFIER	TRIDC7BG070820-TRIDC7BG070830	AB=0.258883;ABP=102.49;AC=141;AF=0.559524;AN=252;AO=395;CIGAR=1X;DP=968;DPB=968;DPRA=0.833539;EPP=27.6881;EPPR=62.2237;GTI=24;LEN=1;MEANALT=1;MQM=33.7139;MQMR=69.9895;NS=63;NUMALT=1;ODDS=0.250465;PAIRED=1;PAIREDR=1;PAO=0;PQA=0;PQR=0;PRO=0;QA=15183;QR=21212;RO=573;RPL=224;RPP=18.4525;RPPR=6.1974;RPR=171;RUN=1;SAF=190;SAP=4.24721;SAR=205;SRF=243;SRP=31.6942;SRR=330;TYPE=snp;ANN=A|intergenic_region|…
chr7B	719499864	C	T	REF	ALT1	intergenic_region	MODIFIER	TRIDC7BG070820-TRIDC7BG070830	AB=0.26506;ABP=82.5961;AC=139;AF=0.551587;AN=252;AO=284;CIGAR=1X;DP=688;DPB=688;DPRA=0.964441;EPP=8.17902;EPPR=14.3837;GTI=24;LEN=1;MEANALT=1;MQM=42.1549;MQMR=68.5198;NS=63;NUMALT=1;ODDS=0.111226;PAIRED=1;PAIREDR=1;PAO=0;PQA=0;PQR=0;PRO=0;QA=10836;QR=15151;RO=404;RPL=207;RPP=132.228;RPPR=70.4334;RPR=77;RUN=1;SAF=94;SAP=73.4761;SAR=190;SRF=121;SRP=144.07;SRR=283;TYPE=snp;ANN=T|intergenic_region|MO…
chr7B	719499885	G	A	REF	ALT1	intergenic_region	MODIFIER	TRIDC7BG070820-TRIDC7BG070830	AB=0.260563;ABP=73.7208;AC=139;AF=0.551587;AN=252;AO=270;CIGAR=1X;DP=618;DPB=618;DPRA=1.03618;EPP=6.2273;EPPR=17.3869;GTI=27;LEN=1;MEANALT=1;MQM=45.8444;MQMR=68.3391;NS=63;NUMALT=1;ODDS=0.0184444;PAIRED=1;PAIREDR=1;PAO=0;PQA=0;PQR=0;PRO=0;QA=9822;QR=12914;RO=348;RPL=193;RPP=111.23;RPPR=58.1457;RPR=77;RUN=1;SAF=96;SAP=51.9408;SAR=174;SRF=105;SRP=121.842;SRR=243;TYPE=snp;ANN=A|intergenic_region|MOD…
chr7B	719499893	C	T	REF	ALT1	intergenic_region	MODIFIER	TRIDC7BG070820-TRIDC7BG070830	AB=0.245763;ABP=69.2586;AC=138;AF=0.547619;AN=252;AO=262;CIGAR=1X;DP=575;DPB=575;DPRA=1.1256;EPP=3.04345;EPPR=6.06979;GTI=30;LEN=1;MEANALT=1;MQM=46.687;MQMR=68.3962;NS=63;NUMALT=1;ODDS=0.037679;PAIRED=1;PAIREDR=1;PAO=0;PQA=0;PQR=0;PRO=0;QA=9773;QR=11627;RO=313;RPL=155;RPP=22.106;RPPR=46.3079;RPR=107;RUN=1;SAF=95;SAP=45.9756;SAR=167;SRF=99;SRP=94.7602;SRR=214;TYPE=snp;ANN=T|intergenic_region|MODIF…
chr7B	719499918	A	G	REF	ALT1	intergenic_region	MODIFIER	TRIDC7BG070820-TRIDC7BG070830	AB=0.180952;ABP=95.8459;AC=130;AF=0.550847;AN=236;AO=194;CIGAR=1X;DP=440;DPB=440;DPRA=1.11806;EPP=3.41325;EPPR=15.7567;GTI=21;LEN=1;MEANALT=1;MQM=41.9639;MQMR=69.8496;NS=59;NUMALT=1;ODDS=0.0311269;PAIRED=1;PAIREDR=1;PAO=0;PQA=0;PQR=0;PRO=0;QA=7157;QR=8586;RO=246;RPL=53;RPP=89.6901;RPPR=8.97744;RPR=141;RUN=1;SAF=81;SAP=14.4721;SAR=113;SRF=88;SRP=46.2632;SRR=158;TYPE=snp;ANN=G|intergenic_region|MOD…
chr7B	719499923	T	C	REF	ALT1	intergenic_region	MODIFIER	TRIDC7BG070820-TRIDC7BG070830	AB=0.184466;ABP=92.0828;AC=132;AF=0.559322;AN=236;AO=197;CIGAR=1X;DP=443;DPB=443;DPRA=1.11905;EPP=3.55041;EPPR=13.8677;GTI=16;LEN=1;MEANALT=1.02778;MQM=42.2284;MQMR=70;NS=59;NUMALT=1;ODDS=0.141125;PAIRED=1;PAIREDR=1;PAO=0;PQA=0;PQR=0;PRO=0;QA=7401;QR=9029;RO=245;RPL=54;RPP=90.3211;RPPR=5.57175;RPR=143;RUN=1;SAF=84;SAP=12.2804;SAR=113;SRF=87;SRP=47.6895;SRR=158;TYPE=snp;ANN=C|intergenic_region|MOD…
chr7B	719531862	G	A	REF	ALT1	intergenic_region	MODIFIER	TRIDC7BG070820-TRIDC7BG070830	AB=0.2;ABP=14.7363;AC=30;AF=0.208333;AN=144;AO=17;CIGAR=1X;DP=326;DPB=326;DPRA=1.14976;EPP=39.9253;EPPR=174.585;GTI=9;LEN=1;MEANALT=1;MQM=17.8824;MQMR=56.026;NS=36;NUMALT=1;ODDS=4.80849;PAIRED=1;PAIREDR=1;PAO=0;PQA=0;PQR=0;PRO=0;QA=618;QR=11758;RO=308;RPL=0;RPP=39.9253;RPPR=197.287;RPR=17;RUN=1;SAF=17;SAP=39.9253;SAR=0;SRF=285;SRP=486.967;SRR=23;TYPE=snp;ANN=A|intergenic_region|MODIFIER|TRIDC7BG0…
chr7B	719532072	TAA	TAAA	REF	ALT1	intergenic_region	MODIFIER	TRIDC7BG070820-TRIDC7BG070830	AB=0.225;ABP=55.5599;AC=59;AF=0.307292;AN=192;AO=55;CIGAR=1M1I2M;DP=369;DPB=401;DPRA=1.7038;EPP=9.68264;EPPR=40.8797;GTI=21;LEN=1;MEANALT=1;MQM=14.6364;MQMR=68.6815;NS=48;NUMALT=1;ODDS=6.41104;PAIRED=1;PAIREDR=1;PAO=12.5;PQA=397;PQR=397;PRO=12.5;QA=745;QR=11811;RO=314;RPL=21;RPP=9.68264;RPPR=54.1575;RPR=34;RUN=1;SAF=0;SAP=122.441;SAR=55;SRF=34;SRP=421.51;SRR=280;TYPE=ins;ANN=TAAA|intergenic_regio…
chr7B	719552751	C	T	ALT1	REF	intergenic_region	MODIFIER	TRIDC7BG070820-TRIDC7BG070830	AB=0.428571;ABP=3.32051;AC=16;AF=0.125;AN=128;AO=6;CIGAR=1X;DP=56;DPB=56;DPRA=1.17391;EPP=4.45795;EPPR=28.0257;GTI=8;LEN=1;MEANALT=1;MQM=54;MQMR=59;NS=32;NUMALT=1;ODDS=5.01812;PAIRED=1;PAIREDR=1;PAO=0;PQA=0;PQR=0;PRO=0;QA=227;QR=1859;RO=50;RPL=2;RPP=4.45795;RPPR=28.0257;RPR=4;RUN=1;SAF=6;SAP=16.0391;SAR=0;SRF=50;SRP=111.584;SRR=0;TYPE=snp;ANN=T|intergenic_region|MODIFIER|TRIDC7BG070820-TRIDC7BG07…
chr7B	719558090	G	A	REF	ALT1	downstream_gene_variant	MODIFIER	TRIDC7BG070830	AB=0.470588;ABP=3.52123;AC=124;AF=0.508197;AN=244;AO=109;CIGAR=1X;DP=373;DPB=373;DPRA=0.493756;EPP=50.8425;EPPR=51.9634;GTI=43;LEN=1;MEANALT=1;MQM=70;MQMR=69.9392;NS=61;NUMALT=1;ODDS=0.371706;PAIRED=1;PAIREDR=1;PAO=0;PQA=0;PQR=0;PRO=0;QA=4130;QR=9842;RO=263;RPL=28;RPP=58.9705;RPPR=90.604;RPR=81;RUN=1;SAF=107;SAP=222.648;SAR=2;SRF=240;SRP=391.803;SRR=23;TYPE=snp;ANN=A|downstream_gene_variant|MODIF…
chr7B	719558118	G	A	REF	ALT1	downstream_gene_variant	MODIFIER	TRIDC7BG070830	AB=0.425743;ABP=7.84774;AC=128;AF=0.52459;AN=244;AO=151;CIGAR=1X;DP=563;DPB=563;DPRA=0.409997;EPP=16.8301;EPPR=49.581;GTI=43;LEN=1;MEANALT=1;MQM=69.649;MQMR=69.6432;NS=61;NUMALT=1;ODDS=0.0466832;PAIRED=1;PAIREDR=1;PAO=0;PQA=0;PQR=0;PRO=0;QA=5520;QR=15118;RO=412;RPL=70;RPP=4.75035;RPPR=103.383;RPR=81;RUN=1;SAF=128;SAP=161.557;SAR=23;SRF=292;SRP=158.935;SRR=120;TYPE=snp;ANN=A|downstream_gene_varian…
chr7B	719558123	G	A	ALT1	REF	downstream_gene_variant	MODIFIER	TRIDC7BG070830	AB=0.63981;ABP=74.6586;AC=87;AF=0.350806;AN=248;AO=307;CIGAR=1X;DP=587;DPB=587;DPRA=3.36182;EPP=49.4176;EPPR=59.2429;GTI=21;LEN=1;MEANALT=1;MQM=69.5212;MQMR=69.6237;NS=62;NUMALT=1;ODDS=0.00687678;PAIRED=1;PAIREDR=1;PAO=0;PQA=0;PQR=0;PRO=0;QA=11247;QR=10114;RO=279;RPL=112;RPP=51.7376;RPPR=21.6974;RPR=195;RUN=1;SAF=219;SAP=124.393;SAR=88;SRF=210;SRP=157.745;SRR=69;TYPE=snp;ANN=A|downstream_gene_var…
chr7B	719558133	CT	GC,GT	ALT1	ALT2	downstream_gene_variant	MODIFIER	TRIDC7BG070830	AB=0.689412,0.207792;ABP=135.45,60.1172;AC=84,135;AF=0.33871,0.544355;AN=248;AO=331,182;CIGAR=2X,1X1M;DP=633;DPB=633.5;DPRA=3.07769,0.691323;EPP=59.7507,51.8804;EPPR=33.6846;GTI=32;LEN=2,1;MEANALT=1.17241,1.13514;MQM=69.5287,68.6099;MQMR=70;NS=62;NUMALT=2;ODDS=0.434139;PAIRED=1,1;PAIREDR=1;PAO=0,0.5;PQA=0,0;PQR=0;PRO=0.5;QA=12188,6634;QR=4351;RO=119;RPL=130,84;RPP=36.081,5.34881;RPPR=30.765;RPR=2…
chr7B	719558143	A	G	REF	ALT1	downstream_gene_variant	MODIFIER	TRIDC7BG070830	AB=0.323741;ABP=40.519;AC=124;AF=0.516667;AN=240;AO=184;CIGAR=1X;DP=743;DPB=743;DPRA=0.398566;EPP=54.4175;EPPR=47.4847;GTI=39;LEN=1;MEANALT=1;MQM=68.8587;MQMR=69.551;NS=60;NUMALT=1;ODDS=0.103283;PAIRED=1;PAIREDR=1;PAO=0;PQA=0;PQR=0;PRO=0;QA=6833;QR=20824;RO=559;RPL=75;RPP=16.6528;RPPR=111.347;RPR=109;RUN=1;SAF=134;SAP=86.2815;SAR=50;SRF=368;SRP=124.71;SRR=191;TYPE=snp;ANN=G|downstream_gene_varian…
chr7B	719558156	A	T	REF	ALT1	downstream_gene_variant	MODIFIER	TRIDC7BG070830	AB=0.342466;ABP=34.4818;AC=132;AF=0.532258;AN=248;AO=188;CIGAR=1X;DP=766;DPB=766;DPRA=0.372134;EPP=21.4909;EPPR=11.6661;GTI=42;LEN=1;MEANALT=1;MQM=68.883;MQMR=69.4758;NS=62;NUMALT=1;ODDS=0.0524992;PAIRED=1;PAIREDR=1;PAO=0;PQA=0;PQR=0;PRO=0;QA=7123;QR=21759;RO=578;RPL=78;RPP=14.8379;RPPR=57.1093;RPR=110;RUN=1;SAF=122;SAP=39.2323;SAR=66;SRF=348;SRP=55.321;SRR=230;TYPE=snp;ANN=T|downstream_gene_vari…
chr7B	719558261	G	A	REF	ALT1	downstream_gene_variant	MODIFIER	TRIDC7BG070830	AB=0.130435;ABP=166.72;AC=147;AF=0.574219;AN=256;AO=308;CIGAR=1X;DP=985;DPB=985;DPRA=0.534357;EPP=3.71532;EPPR=3.55237;GTI=22;LEN=1;MEANALT=1;MQM=69.3604;MQMR=70;NS=64;NUMALT=1;ODDS=0.236711;PAIRED=1;PAIREDR=1;PAO=0;PQA=0;PQR=0;PRO=0;QA=11299;QR=24323;RO=677;RPL=138;RPP=10.2297;RPPR=15.7408;RPR=170;RUN=1;SAF=163;SAP=5.29458;SAR=145;SRF=395;SRP=43.9668;SRR=282;TYPE=snp;ANN=A|downstream_gene_varian…
chr7B	719558377	CGACG	CGACA	REF	ALT1	downstream_gene_variant	MODIFIER	TRIDC7BG070830	AB=0.296736;ABP=123.949;AC=143;AF=0.558594;AN=256;AO=528;CIGAR=4M1X;DP=1551;DPB=1610.6;DPRA=0.667941;EPP=10.265;EPPR=27.6497;GTI=24;LEN=1;MEANALT=1.14634;MQM=69.4962;MQMR=70;NS=64;NUMALT=1;ODDS=1.13403;PAIRED=1;PAIREDR=1;PAO=35.5;PQA=1138;PQR=2087;PRO=76.5;QA=19614;QR=36610;RO=1009;RPL=206;RPP=58.3499;RPPR=33.4862;RPR=322;RUN=1;SAF=387;SAP=251.891;SAR=141;SRF=524;SRP=6.28365;SRR=485;TYPE=snp;ANN=…
chr7B	719558390	C	T	REF	ALT1	downstream_gene_variant	MODIFIER	TRIDC7BG070830	AB=0.451289;ABP=17.3955;AC=113;AF=0.441406;AN=256;AO=382;CIGAR=1X;DP=1512;DPB=1512;DPRA=0.667039;EPP=8.12633;EPPR=29.7675;GTI=36;LEN=1;MEANALT=1;MQM=69.9267;MQMR=69.7566;NS=64;NUMALT=1;ODDS=0.100944;PAIRED=1;PAIREDR=1;PAO=0;PQA=0;PQR=0;PRO=0;QA=14569;QR=42005;RO=1130;RPL=174;RPP=9.58156;RPPR=20.7203;RPR=208;RUN=1;SAF=296;SAP=253.696;SAR=86;SRF=555;SRP=3.77896;SRR=575;TYPE=snp;ANN=T|downstream_gen…
chr7B	719558395	A	G	REF	ALT1	downstream_gene_variant	MODIFIER	TRIDC7BG070830	AB=0.455213;ABP=14.8753;AC=116;AF=0.453125;AN=256;AO=375;CIGAR=1X;DP=1507;DPB=1507;DPRA=0.643741;EPP=21.8239;EPPR=36.9724;GTI=36;LEN=1;MEANALT=1.025;MQM=69.9547;MQMR=69.7206;NS=64;NUMALT=1;ODDS=0.216377;PAIRED=1;PAIREDR=1;PAO=0;PQA=0;PQR=0;PRO=0;QA=14242;QR=41009;RO=1131;RPL=174;RPP=7.23164;RPPR=14.3937;RPR=201;RUN=1;SAF=289;SAP=241.635;SAR=86;SRF=532;SRP=11.629;SRR=599;TYPE=snp;ANN=G|downstream_…
chr7B	719558510	TGTTGATATT	TAGGAGGCTGACATA	REF	ALT1	downstream_gene_variant	MODIFIER	TRIDC7BG070830	AB=0.156863;ABP=55.1682;AC=120;AF=0.545455;AN=220;AO=92;CIGAR=1M5I1M1X3M1X2M1X;DP=258;DPB=422.8;DPRA=1.39691;EPP=57.3915;EPPR=45.4092;GTI=64;LEN=13;MEANALT=1.54839;MQM=68.2391;MQMR=70;NS=55;NUMALT=1;ODDS=0.30265;PAIRED=1;PAIREDR=1;PAO=0.75;PQA=24.5;PQR=414.667;PRO=14.25;QA=3505;QR=4454;RO=118;RPL=79;RPP=105.825;RPPR=69.2586;RPR=13;RUN=1;SAF=9;SAP=132.26;SAR=83;SRF=6;SRP=209.779;SRR=112;TYPE=compl…
chr7B	719562126	CC	TT	REF	ALT1	missense_variant	MODERATE	TRIDC7BG070830	AB=0.372832;ABP=51.6111;AC=150;AF=0.585938;AN=256;AO=801;CIGAR=2X;DP=1301;DPB=1317;DPRA=1.67438;EPP=4.20583;EPPR=10.9245;GTI=12;LEN=2;MEANALT=1.1875;MQM=52.5718;MQMR=69.564;NS=64;NUMALT=1;ODDS=0.138359;PAIRED=1;PAIREDR=1;PAO=0;PQA=0;PQR=1061;PRO=32;QA=30562;QR=18253;RO=484;RPL=522;RPP=163.089;RPPR=112.194;RPR=279;RUN=1;SAF=277;SAP=168.403;SAR=524;SRF=201;SRP=33.1776;SRR=283;TYPE=mnp;ANN=TT|missen…
chr7B	719562179	G	A	REF	ALT1	synonymous_variant	LOW	TRIDC7BG070830	AB=0.419162;ABP=12.4894;AC=147;AF=0.574219;AN=256;AO=613;CIGAR=1X;DP=937;DPB=937;DPRA=1.70112;EPP=8.96502;EPPR=3.9754;GTI=18;LEN=1;MEANALT=1;MQM=52.5171;MQMR=66.0185;NS=64;NUMALT=1;ODDS=0.0169652;PAIRED=1;PAIREDR=1;PAO=0;PQA=0;PQR=0;PRO=0;QA=21780;QR=11488;RO=324;RPL=298;RPP=4.03404;RPPR=3.68051;RPR=315;RUN=1;SAF=156;SAP=323.953;SAR=457;SRF=85;SRP=161.957;SRR=239;TYPE=snp;ANN=A|synonymous_variant…
chr7B	719562289	TTTTT	CTTTT	REF	ALT1	missense_variant	MODERATE	TRIDC7BG070830	AB=0.362637;ABP=17.9243;AC=142;AF=0.612069;AN=232;AO=296;CIGAR=1X4M;DP=462;DPB=476.8;DPRA=2.19231;EPP=8.76177;EPPR=3.81032;GTI=32;LEN=1;MEANALT=1.41026;MQM=39.5135;MQMR=50.2857;NS=58;NUMALT=1;ODDS=0.0509361;PAIRED=1;PAIREDR=1;PAO=7.5;PQA=233.5;PQR=590.5;PRO=18.5;QA=9288;QR=4976;RO=133;RPL=218;RPP=146.797;RPPR=45.4765;RPR=78;RUN=1;SAF=134;SAP=8.76177;SAR=162;SRF=42;SRP=42.2111;SRR=91;TYPE=snp;ANN=…
chr7B	719562759	A	G	ALT1	REF	missense_variant	MODERATE	TRIDC7BG070830	AB=0.447154;ABP=14.9446;AC=131;AF=0.519841;AN=252;AO=232;CIGAR=1X;DP=515;DPB=515;DPRA=3.81168;EPP=24.5753;EPPR=27.1583;GTI=11;LEN=1;MEANALT=1.01695;MQM=35.6207;MQMR=63.5603;NS=63;NUMALT=1;ODDS=0.159431;PAIRED=1;PAIREDR=1;PAO=0;PQA=0;PQR=0;PRO=0;QA=8734;QR=10466;RO=282;RPL=66;RPP=96.6082;RPPR=23.8318;RPR=166;RUN=1;SAF=178;SAP=146.927;SAR=54;SRF=156;SRP=9.94053;SRR=126;TYPE=snp;ANN=G|missense_varia…
chr7B	719562929	A	G	ALT1	REF	synonymous_variant	LOW	TRIDC7BG070830	AB=0.177656;ABP=495.783;AC=46;AF=0.194915;AN=236;AO=109;CIGAR=1X;DP=868;DPB=868;DPRA=3.08647;EPP=30.2832;EPPR=43.5244;GTI=16;LEN=1;MEANALT=1;MQM=43.1009;MQMR=51.6061;NS=59;NUMALT=1;ODDS=0.0331932;PAIRED=1;PAIREDR=1;PAO=0;PQA=0;PQR=0;PRO=0;QA=4002;QR=27978;RO=759;RPL=57;RPP=3.50834;RPPR=29.9291;RPR=52;RUN=1;SAF=41;SAP=17.5333;SAR=68;SRF=268;SRP=145.283;SRR=491;TYPE=snp;ANN=G|synonymous_variant|LOW…
chr7B	719563795	TGGT	CGGC,TGGC	ALT2	REF	missense_variant	MODERATE	TRIDC7BG070830	AB=0.173077,0.282609;ABP=51.2838,21.8927;AC=15,15;AF=0.107143,0.107143;AN=140;AO=12,15;CIGAR=1X2M1X,3M1X;DP=149;DPB=154.25;DPRA=1.90972,1.88383;EPP=14.5915,20.5268;EPPR=10.1299;GTI=11;LEN=4,1;MEANALT=1.375,1.42857;MQM=67.25,60.2667;MQMR=70;NS=35;NUMALT=2;ODDS=0.374154;PAIRED=1,1;PAIREDR=1;PAO=0,1.5;PQA=0,52;PQR=180;PRO=5.5;QA=421,591;QR=4448;RO=122;RPL=8,0;RPP=5.9056,35.5824;RPPR=23.5859;RPR=4,15…
chr7B	719563805	A	G	REF	ALT1	synonymous_variant	LOW	TRIDC7BG070830	AB=0.509091;ABP=3.04978;AC=110;AF=0.743243;AN=148;AO=115;CIGAR=1X;DP=149;DPB=149;DPRA=3.92627;EPP=12.9991;EPPR=23.7032;GTI=14;LEN=1;MEANALT=1;MQM=69.8087;MQMR=64.7353;NS=37;NUMALT=1;ODDS=0.729803;PAIRED=1;PAIREDR=1;PAO=0;PQA=0;PQR=0;PRO=0;QA=4318;QR=1257;RO=34;RPL=66;RPP=8.4673;RPPR=19.3602;RPR=49;RUN=1;SAF=61;SAP=3.93554;SAR=54;SRF=23;SRP=12.2071;SRR=11;TYPE=snp;ANN=G|synonymous_variant|LOW|TRID…
chr7B	719563808	T	C	ALT1	REF	synonymous_variant	LOW	TRIDC7BG070830	AB=0.472727;ABP=3.36563;AC=32;AF=0.216216;AN=148;AO=31;CIGAR=1X;DP=150;DPB=150;DPRA=1.57576;EPP=23.254;EPPR=6.09416;GTI=10;LEN=1;MEANALT=1;MQM=64.2258;MQMR=69.8151;NS=37;NUMALT=1;ODDS=0.556618;PAIRED=1;PAIREDR=1;PAO=0;PQA=0;PQR=0;PRO=0;QA=1186;QR=4393;RO=119;RPL=6;RPP=28.2974;RPPR=20.5463;RPR=25;RUN=1;SAF=22;SAP=14.8483;SAR=9;SRF=63;SRP=3.90444;SRR=56;TYPE=snp;ANN=C|synonymous_variant|LOW|TRIDC7B…
chr7B	719574535	A	G	ALT1	REF	intergenic_region	MODIFIER	TRIDC7BG070830-TRIDC7BG070850	AB=0.515152;ABP=3.0761;AC=59;AF=0.327778;AN=180;AO=31;CIGAR=1X;DP=95;DPB=95;DPRA=1.33991;EPP=4.76149;EPPR=33.5466;GTI=24;LEN=1;MEANALT=1;MQM=57.2258;MQMR=40.9688;NS=45;NUMALT=1;ODDS=0.257942;PAIRED=1;PAIREDR=1;PAO=0;PQA=0;PQR=0;PRO=0;QA=1219;QR=2342;RO=64;RPL=9;RPP=14.8483;RPPR=29.6108;RPR=22;RUN=1;SAF=25;SAP=28.2974;SAR=6;SRF=53;SRP=62.8615;SRR=11;TYPE=snp;ANN=G|intergenic_region|MODIFIER|TRIDC7…
chr7B	719574553	C	T	REF	ALT1	intergenic_region	MODIFIER	TRIDC7BG070830-TRIDC7BG070850	AB=0.440678;ABP=4.81373;AC=107;AF=0.581522;AN=184;AO=63;CIGAR=1X;DP=118;DPB=118;DPRA=1.37143;EPP=7.18091;EPPR=20.4216;GTI=25;LEN=1;MEANALT=1;MQM=40.1587;MQMR=54.8545;NS=46;NUMALT=1;ODDS=0.0972;PAIRED=1;PAIREDR=1;PAO=0;PQA=0;PQR=0;PRO=0;QA=2373;QR=2062;RO=55;RPL=27;RPP=5.80219;RPPR=4.94488;RPR=36;RUN=1;SAF=56;SAP=85.7675;SAR=7;SRF=46;SRP=57.0602;SRR=9;TYPE=snp;ANN=T|intergenic_region|MODIFIER|TRID…
chr7B	719574595	A	G	REF	ALT1	intergenic_region	MODIFIER	TRIDC7BG070830-TRIDC7BG070850	AB=0.184466;ABP=92.0828;AC=87;AF=0.494318;AN=176;AO=49;CIGAR=1X;DP=195;DPB=195;DPRA=1.42342;EPP=51.2702;EPPR=151.741;GTI=41;LEN=1;MEANALT=1;MQM=38.0612;MQMR=65.2603;NS=44;NUMALT=1;ODDS=0.192062;PAIRED=1;PAIREDR=1;PAO=0;PQA=0;PQR=0;PRO=0;QA=1750;QR=5481;RO=146;RPL=44;RPP=70.4146;RPPR=151.741;RPR=5;RUN=1;SAF=46;SAP=84.9501;SAR=3;SRF=140;SRP=270.072;SRR=6;TYPE=snp;ANN=G|intergenic_region|MODIFIER|TR…
chr7B	719581389	A	T	REF	ALT1	intergenic_region	MODIFIER	TRIDC7BG070830-TRIDC7BG070850	AB=0.429577;ABP=9.12712;AC=169;AF=0.754464;AN=224;AO=158;CIGAR=1X;DP=275;DPB=275;DPRA=0.650871;EPP=40.1727;EPPR=34.209;GTI=18;LEN=1;MEANALT=1;MQM=27.5506;MQMR=66.3761;NS=56;NUMALT=1;ODDS=0.303009;PAIRED=1;PAIREDR=1;PAO=0;PQA=0;PQR=0;PRO=0;QA=5958;QR=4304;RO=117;RPL=108;RPP=49.2434;RPPR=7.18621;RPR=50;RUN=1;SAF=85;SAP=4.98936;SAR=73;SRF=54;SRP=4.51363;SRR=63;TYPE=snp;ANN=T|intergenic_region|MODIFI…
chr7B	719630737	G	C	ALT1	REF	intergenic_region	MODIFIER	TRIDC7BG070830-TRIDC7BG070850	AB=0.134615;ABP=63.3104;AC=16;AF=0.1;AN=160;AO=13;CIGAR=1X;DP=163;DPB=163;DPRA=2.60408;EPP=11.1951;EPPR=11.3488;GTI=5;LEN=1;MEANALT=1;MQM=39.3077;MQMR=54.3533;NS=40;NUMALT=1;ODDS=3.75181;PAIRED=1;PAIREDR=1;PAO=0;PQA=0;PQR=0;PRO=0;QA=493;QR=5501;RO=150;RPL=2;RPP=16.5402;RPPR=120.27;RPR=11;RUN=1;SAF=12;SAP=23.2217;SAR=1;SRF=103;SRP=48.4085;SRR=47;TYPE=snp;ANN=C|intergenic_region|MODIFIER|TRIDC7BG07…
chr7B	719630779	C	G	ALT1	REF	intergenic_region	MODIFIER	TRIDC7BG070830-TRIDC7BG070850	AB=0.182927;ABP=74.6159;AC=15;AF=0.0914634;AN=164;AO=19;CIGAR=1X;DP=204;DPB=204;DPRA=3.53995;EPP=12.2676;EPPR=13.6316;GTI=4;LEN=1;MEANALT=1;MQM=38.9474;MQMR=54.7717;NS=41;NUMALT=1;ODDS=1.64051;PAIRED=1;PAIREDR=1;PAO=0;PQA=0;PQR=0;PRO=0;QA=630;QR=6552;RO=184;RPL=10;RPP=3.12459;RPPR=18.305;RPR=9;RUN=1;SAF=13;SAP=8.61041;SAR=6;SRF=113;SRP=23.8281;SRR=71;TYPE=snp;ANN=G|intergenic_region|MODIFIER|TRID…
chr7B	719630896	AAC	GAC,GAA	ALT1	ALT2	intergenic_region	MODIFIER	TRIDC7BG070830-TRIDC7BG070850	AB=0.5375,0.356322;ABP=3.98746,18.61;AC=51,59;AF=0.364286,0.421429;AN=140;AO=59,49;CIGAR=1X2M,1X1M1X;DP=131;DPB=131.667;DPRA=3.68286,2.85714;EPP=26.0132,6.59988;EPPR=7.63648;GTI=37;LEN=1,3;MEANALT=1.41176,1.33333;MQM=43.0169,50.1837;MQMR=70;NS=35;NUMALT=2;ODDS=0.070248;PAIRED=1,1;PAIREDR=1;PAO=0,0;PQA=0,0;PQR=0;PRO=0;QA=1832,1835;QR=812;RO=23;RPL=36,23;RPP=9.23028,3.40914;RPPR=3.10471;RPR=23,26;R…
chr7B	719630931	C	T	ALT1	REF	intergenic_region	MODIFIER	TRIDC7BG070830-TRIDC7BG070850	AB=0.333333;ABP=5.18177;AC=24;AF=0.136364;AN=176;AO=14;CIGAR=1X;DP=158;DPB=158;DPRA=1.72222;EPP=25.3454;EPPR=3.38993;GTI=9;LEN=1;MEANALT=1;MQM=28.0714;MQMR=49.7203;NS=44;NUMALT=1;ODDS=1.7134;PAIRED=1;PAIREDR=1;PAO=0;PQA=0;PQR=0;PRO=0;QA=461;QR=5210;RO=143;RPL=0;RPP=33.4109;RPPR=21.6121;RPR=14;RUN=1;SAF=13;SAP=25.3454;SAR=1;SRF=50;SRP=31.0876;SRR=93;TYPE=snp;ANN=T|intergenic_region|MODIFIER|TRIDC7…
chr7B	719630947	C	A	ALT1	REF	intergenic_region	MODIFIER	TRIDC7BG070830-TRIDC7BG070850	AB=0.4375;ABP=3.55317;AC=33;AF=0.20625;AN=160;AO=21;CIGAR=1X;DP=129;DPB=129;DPRA=1.40476;EPP=26.2761;EPPR=5.02092;GTI=14;LEN=1;MEANALT=1;MQM=30.5238;MQMR=49.9352;NS=40;NUMALT=1;ODDS=0.196326;PAIRED=1;PAIREDR=1;PAO=0;PQA=0;PQR=0;PRO=0;QA=769;QR=3961;RO=108;RPL=13;RPP=5.59539;RPPR=26.2531;RPR=8;RUN=1;SAF=16;SAP=15.5221;SAR=5;SRF=36;SRP=29.068;SRR=72;TYPE=snp;ANN=A|intergenic_region|MODIFIER|TRIDC7B…
chr7B	719630953	G	A	REF	ALT1	intergenic_region	MODIFIER	TRIDC7BG070830-TRIDC7BG070850	AB=0.42623;ABP=5.89373;AC=63;AF=0.414474;AN=152;AO=44;CIGAR=1X;DP=115;DPB=115;DPRA=2.01154;EPP=7.94546;EPPR=25.3061;GTI=20;LEN=1;MEANALT=1;MQM=50.0682;MQMR=44.2254;NS=38;NUMALT=1;ODDS=0.233396;PAIRED=1;PAIREDR=1;PAO=0;PQA=0;PQR=0;PRO=0;QA=1604;QR=2586;RO=71;RPL=32;RPP=22.751;RPPR=28.7315;RPR=12;RUN=1;SAF=7;SAP=47.4268;SAR=37;SRF=38;SRP=3.7749;SRR=33;TYPE=snp;ANN=A|intergenic_region|MODIFIER|TRIDC…
chr7B	719630957	GCTAA	CCTAG	ALT1	REF	intergenic_region	MODIFIER	TRIDC7BG070830-TRIDC7BG070850	AB=0.416667;ABP=3.73412;AC=26;AF=0.175676;AN=148;AO=17;CIGAR=1X3M1X;DP=105;DPB=110;DPRA=1.44489;EPP=39.9253;EPPR=13.6028;GTI=12;LEN=5;MEANALT=1;MQM=31.1176;MQMR=52.1585;NS=37;NUMALT=1;ODDS=0.103672;PAIRED=1;PAIREDR=1;PAO=0;PQA=0;PQR=214.5;PRO=6.5;QA=632;QR=3033;RO=82;RPL=13;RPP=13.3567;RPPR=37.3302;RPR=4;RUN=1;SAF=13;SAP=13.3567;SAR=4;SRF=28;SRP=20.9117;SRR=54;TYPE=complex;ANN=CCTAG|intergenic_re…
chr7B	719630966	C	T	REF	ALT1	intergenic_region	MODIFIER	TRIDC7BG070830-TRIDC7BG070850	AB=0.446809;ABP=4.16534;AC=68;AF=0.472222;AN=144;AO=42;CIGAR=1X;DP=101;DPB=101;DPRA=1.57994;EPP=43.5445;EPPR=29.8409;GTI=25;LEN=1;MEANALT=1;MQM=50.381;MQMR=42.3051;NS=36;NUMALT=1;ODDS=0.487875;PAIRED=1;PAIREDR=1;PAO=0;PQA=0;PQR=0;PRO=0;QA=1630;QR=2135;RO=59;RPL=35;RPP=43.5445;RPPR=3.34154;RPR=7;RUN=1;SAF=6;SAP=49.5419;SAR=36;SRF=33;SRP=4.81373;SRR=26;TYPE=snp;ANN=T|intergenic_region|MODIFIER|TRID…
chr7B	719631159	G	A	REF	ALT1	intergenic_region	MODIFIER	TRIDC7BG070830-TRIDC7BG070850	AB=0.6;ABP=5.18177;AC=78;AF=0.629032;AN=124;AO=44;CIGAR=1X;DP=70;DPB=70;DPRA=1.5;EPP=60.0608;EPPR=3.0103;GTI=14;LEN=1;MEANALT=1;MQM=57.8636;MQMR=57.6538;NS=31;NUMALT=1;ODDS=0.0179047;PAIRED=1;PAIREDR=1;PAO=0;PQA=0;PQR=0;PRO=0;QA=1563;QR=989;RO=26;RPL=8;RPP=41.702;RPPR=11.3621;RPR=36;RUN=1;SAF=7;SAP=47.4268;SAR=37;SRF=5;SRP=24.391;SRR=21;TYPE=snp;ANN=A|intergenic_region|MODIFIER|TRIDC7BG070830-TRI…
chr7B	719664444	A	G	ALT1	REF	intergenic_region	MODIFIER	TRIDC7BG070830-TRIDC7BG070850	AB=0.307692;ABP=11.3621;AC=36;AF=0.236842;AN=152;AO=17;CIGAR=1X;DP=88;DPB=88;DPRA=1.13208;EPP=4.1599;EPPR=5.48761;GTI=18;LEN=1;MEANALT=1;MQM=24.9412;MQMR=35.1268;NS=38;NUMALT=1;ODDS=5.27392;PAIRED=1;PAIREDR=1;PAO=0;PQA=0;PQR=0;PRO=0;QA=602;QR=2475;RO=71;RPL=2;RPP=24.5973;RPPR=36.3164;RPR=15;RUN=1;SAF=9;SAP=3.13803;SAR=8;SRF=47;SRP=19.1893;SRR=24;TYPE=snp;ANN=G|intergenic_region|MODIFIER|TRIDC7BG0…
chr7B	719665840	A	T	REF	ALT1	intergenic_region	MODIFIER	TRIDC7BG070830-TRIDC7BG070850	AB=0;ABP=0;AC=92;AF=0.92;AN=100;AO=39;CIGAR=1X;DP=41;DPB=41;DPRA=1.69565;EPP=63.6445;EPPR=5.18177;GTI=1;LEN=1;MEANALT=1;MQM=19.359;MQMR=25;NS=25;NUMALT=1;ODDS=8.70576;PAIRED=1;PAIREDR=1;PAO=0;PQA=0;PQR=0;PRO=0;QA=1215;QR=27;RO=1;RPL=36;RPP=63.6445;RPPR=5.18177;RPR=3;RUN=1;SAF=39;SAP=87.6977;SAR=0;SRF=1;SRP=5.18177;SRR=0;TYPE=snp;ANN=T|intergenic_region|MODIFIER|TRIDC7BG070830-TRIDC7BG070850|TRIDC…
chr7B	719685734	G	A	REF	ALT1	intergenic_region	MODIFIER	TRIDC7BG070850-TRIDC7BG070880	AB=0.5;ABP=3.0103;AC=46;AF=0.605263;AN=76;AO=19;CIGAR=1X;DP=34;DPB=34;DPRA=1.37755;EPP=3.12459;EPPR=10.1038;GTI=5;LEN=1;MEANALT=1;MQM=56.0526;MQMR=70;NS=19;NUMALT=1;ODDS=0.504488;PAIRED=1;PAIREDR=1;PAO=0;PQA=0;PQR=0;PRO=0;QA=703;QR=524;RO=15;RPL=8;RPP=4.03889;RPPR=6.62942;RPR=11;RUN=1;SAF=18;SAP=36.0395;SAR=1;SRF=9;SRP=4.31318;SRR=6;TYPE=snp;ANN=A|intergenic_region|MODIFIER|TRIDC7BG070850-TRIDC7B…
chr7B	719685739	G	A	ALT1	REF	intergenic_region	MODIFIER	TRIDC7BG070850-TRIDC7BG070880	AB=0.5;ABP=3.0103;AC=26;AF=0.342105;AN=76;AO=12;CIGAR=1X;DP=33;DPB=33;DPRA=1.65;EPP=5.9056;EPPR=3.1137;GTI=7;LEN=1;MEANALT=1;MQM=70;MQMR=57.381;NS=19;NUMALT=1;ODDS=7.56155;PAIRED=1;PAIREDR=1;PAO=0;PQA=0;PQR=0;PRO=0;QA=417;QR=759;RO=21;RPL=4;RPP=5.9056;RPPR=3.94093;RPR=8;RUN=1;SAF=6;SAP=3.0103;SAR=6;SRF=20;SRP=40.3389;SRR=1;TYPE=snp;ANN=A|intergenic_region|MODIFIER|TRIDC7BG070850-TRIDC7BG070880|TR…
chr7B	719685741	G	C	REF	ALT1	intergenic_region	MODIFIER	TRIDC7BG070850-TRIDC7BG070880	AB=0.466667;ABP=3.15506;AC=43;AF=0.565789;AN=76;AO=18;CIGAR=1X;DP=33;DPB=33;DPRA=1.71429;EPP=4.9405;EPPR=3.63072;GTI=9;LEN=1;MEANALT=1;MQM=55.2778;MQMR=70;NS=19;NUMALT=1;ODDS=1.43446;PAIRED=1;PAIREDR=1;PAO=0;PQA=0;PQR=0;PRO=0;QA=645;QR=478;RO=14;RPL=12;RPP=7.35324;RPPR=3.63072;RPR=6;RUN=1;SAF=17;SAP=33.8935;SAR=1;SRF=8;SRP=3.63072;SRR=6;TYPE=snp;ANN=C|intergenic_region|MODIFIER|TRIDC7BG070850-TRI…
chr7B	719695096	T	C	ALT1	REF	intergenic_region	MODIFIER	TRIDC7BG070850-TRIDC7BG070880	AB=0.491803;ABP=3.0459;AC=76;AF=0.452381;AN=168;AO=44;CIGAR=1X;DP=99;DPB=99;DPRA=1.65217;EPP=60.0608;EPPR=113.913;GTI=33;LEN=1;MEANALT=1;MQM=43.7955;MQMR=28.9273;NS=42;NUMALT=1;ODDS=41.2704;PAIRED=1;PAIREDR=1;PAO=0;PQA=0;PQR=0;PRO=0;QA=1709;QR=2108;RO=55;RPL=41;RPP=74.2741;RPPR=113.913;RPR=3;RUN=1;SAF=2;SAP=81.9729;SAR=42;SRF=0;SRP=122.441;SRR=55;TYPE=snp;ANN=C|intergenic_region|MODIFIER|TRIDC7BG…
chr7B	719752672	ACCCG	ACCCCCCG	REF	ALT1	upstream_gene_variant	MODIFIER	TRIDC7BG070880	AB=0.2;ABP=10.8276;AC=37;AF=0.298387;AN=124;AO=14;CIGAR=1M3I4M;DP=319;DPB=344.8;DPRA=0.155556;EPP=3.63072;EPPR=236.255;GTI=9;LEN=3;MEANALT=1;MQM=70;MQMR=70;NS=31;NUMALT=1;ODDS=3.19096;PAIRED=1;PAIREDR=1;PAO=13.5;PQA=374;PQR=374;PRO=13.5;QA=386;QR=10329;RO=305;RPL=2;RPP=18.5208;RPPR=67.2645;RPR=12;RUN=1;SAF=8;SAP=3.63072;SAR=6;SRF=165;SRP=7.46004;SRR=140;TYPE=ins;ANN=ACCCCCCG|upstream_gene_variant…
chr7B	719752687	GC	GCCGAC	REF	ALT1	upstream_gene_variant	MODIFIER	TRIDC7BG070880	AB=0.176471;ABP=18.4661;AC=46;AF=0.348485;AN=132;AO=22;CIGAR=1M4I1M;DP=347;DPB=391;DPRA=0.178086;EPP=12.8806;EPPR=353.392;GTI=12;LEN=4;MEANALT=1;MQM=67.7273;MQMR=70;NS=33;NUMALT=1;ODDS=0.000152994;PAIRED=1;PAIREDR=1;PAO=10;PQA=269;PQR=0;PRO=0;QA=669;QR=11171;RO=325;RPL=3;RPP=28.2783;RPPR=33.0033;RPR=19;RUN=1;SAF=9;SAP=4.58955;SAR=13;SRF=147;SRP=9.43118;SRR=178;TYPE=ins;ANN=GCCGAC|upstream_gene_va…
chr7B	719752698	T	C	REF	ALT1	upstream_gene_variant	MODIFIER	TRIDC7BG070880	AB=0.176471;ABP=18.4661;AC=38;AF=0.287879;AN=132;AO=21;CIGAR=1X;DP=345;DPB=345;DPRA=0.225806;EPP=11.386;EPPR=149.813;GTI=10;LEN=1;MEANALT=1;MQM=67.619;MQMR=70;NS=33;NUMALT=1;ODDS=1.26133;PAIRED=1;PAIREDR=1;PAO=0;PQA=0;PQR=0;PRO=0;QA=742;QR=11147;RO=324;RPL=5;RPP=15.5221;RPPR=10.7579;RPR=16;RUN=1;SAF=7;SAP=8.07707;SAR=14;SRF=139;SRP=17.1919;SRR=185;TYPE=snp;ANN=C|upstream_gene_variant|MODIFIER|TRI…
chr7B	719752707	GTT	CTG	REF	ALT1	upstream_gene_variant	MODIFIER	TRIDC7BG070880	AB=0.214286;ABP=12.937;AC=42;AF=0.328125;AN=128;AO=21;CIGAR=1X1M1X;DP=318;DPB=320;DPRA=0.18648;EPP=5.59539;EPPR=30.2159;GTI=11;LEN=3;MEANALT=1;MQM=67.619;MQMR=70;NS=32;NUMALT=1;ODDS=0.934128;PAIRED=1;PAIREDR=1;PAO=0;PQA=0;PQR=111;PRO=4;QA=750;QR=10625;RO=297;RPL=9;RPP=3.94093;RPPR=117.25;RPR=12;RUN=1;SAF=7;SAP=8.07707;SAR=14;SRF=109;SRP=48.6405;SRR=188;TYPE=complex;ANN=CTG|upstream_gene_variant|M…
chr7B	719752713	TCT	TT	REF	ALT1	upstream_gene_variant	MODIFIER	TRIDC7BG070880	AB=0.214286;ABP=12.937;AC=38;AF=0.306452;AN=124;AO=19;CIGAR=1M1D1M;DP=292;DPB=287.667;DPRA=0.208189;EPP=5.8675;EPPR=4.35454;GTI=10;LEN=1;MEANALT=1;MQM=67.3684;MQMR=70;NS=31;NUMALT=1;ODDS=0.928356;PAIRED=1;PAIREDR=1;PAO=2;PQA=61;PQR=96;PRO=3;QA=645;QR=9901;RO=273;RPL=9;RPP=3.12459;RPPR=161.146;RPR=10;RUN=1;SAF=6;SAP=8.61041;SAR=13;SRF=85;SRP=87.3955;SRR=188;TYPE=del;ANN=TT|upstream_gene_variant|MO…
chr7B	719752718	G	C	REF	ALT1	upstream_gene_variant	MODIFIER	TRIDC7BG070880	AB=0.214286;ABP=12.937;AC=38;AF=0.306452;AN=124;AO=20;CIGAR=1X;DP=286;DPB=286;DPRA=0.221034;EPP=4.74748;EPPR=4.61033;GTI=11;LEN=1;MEANALT=1;MQM=67.5;MQMR=70;NS=31;NUMALT=1;ODDS=0.662756;PAIRED=1;PAIREDR=1;PAO=0;PQA=0;PQR=0;PRO=0;QA=725;QR=9799;RO=266;RPL=12;RPP=4.74748;RPPR=196.614;RPR=8;RUN=1;SAF=6;SAP=9.95901;SAR=14;SRF=78;SRP=101.788;SRR=188;TYPE=snp;ANN=C|upstream_gene_variant|MODIFIER|TRIDC7…
chr7B	719752759	G	A	REF	ALT1	upstream_gene_variant	MODIFIER	TRIDC7BG070880	AB=0.333333;ABP=3.73412;AC=45;AF=0.351562;AN=128;AO=23;CIGAR=1X;DP=130;DPB=130;DPRA=0.396825;EPP=5.3706;EPPR=44.1059;GTI=21;LEN=1;MEANALT=1;MQM=70;MQMR=70;NS=32;NUMALT=1;ODDS=0.38185;PAIRED=1;PAIREDR=1;PAO=0;PQA=0;PQR=0;PRO=0;QA=775;QR=3902;RO=107;RPL=11;RPP=3.10471;RPPR=51.7365;RPR=12;RUN=1;SAF=4;SAP=24.253;SAR=19;SRF=10;SRP=156.617;SRR=97;TYPE=snp;ANN=A|upstream_gene_variant|MODIFIER|TRIDC7BG07…
chr7B	719753289	A	T	REF	ALT1	5_prime_UTR_variant	MODIFIER	TRIDC7BG070880	AB=0.134615;ABP=183.911;AC=118;AF=0.517544;AN=228;AO=128;CIGAR=1X;DP=859;DPB=859;DPRA=0.344746;EPP=72.4974;EPPR=54.8401;GTI=29;LEN=1;MEANALT=1;MQM=69.5156;MQMR=70;NS=57;NUMALT=1;ODDS=0.294729;PAIRED=1;PAIREDR=1;PAO=0;PQA=0;PQR=0;PRO=0;QA=4877;QR=27640;RO=730;RPL=19;RPP=140.424;RPPR=32.7565;RPR=109;RUN=1;SAF=115;SAP=179.51;SAR=13;SRF=448;SRP=84.9789;SRR=282;TYPE=snp;ANN=T|5_prime_UTR_variant|MODIF…
chr7B	719753295	AGC	AC	REF	ALT1	5_prime_UTR_variant	MODIFIER	TRIDC7BG070880	AB=0.11875;ABP=205.012;AC=118;AF=0.508621;AN=232;AO=132;CIGAR=1M1D1M;DP=873;DPB=845.667;DPRA=0.369688;EPP=24.3302;EPPR=34.1837;GTI=29;LEN=1;MEANALT=1;MQM=69.5303;MQMR=70;NS=58;NUMALT=1;ODDS=0.295149;PAIRED=1;PAIREDR=1;PAO=14;PQA=68;PQR=411;PRO=25;QA=4863;QR=27298;RO=739;RPL=32;RPP=79.0776;RPPR=40.5306;RPR=100;RUN=1;SAF=114;SAP=154.619;SAR=18;SRF=442;SRP=64.79;SRR=297;TYPE=del;ANN=AC|5_prime_UTR_v…
chr7B	719753310	C	T	REF	ALT1	5_prime_UTR_variant	MODIFIER	TRIDC7BG070880	AB=0.141975;ABP=183.377;AC=128;AF=0.533333;AN=240;AO=165;CIGAR=1X;DP=968;DPB=968;DPRA=0.380952;EPP=32.0817;EPPR=37.6264;GTI=33;LEN=1;MEANALT=1;MQM=69.6242;MQMR=70;NS=60;NUMALT=1;ODDS=0.108689;PAIRED=1;PAIREDR=1;PAO=0;PQA=0;PQR=0;PRO=0;QA=5723;QR=29541;RO=801;RPL=33;RPP=131.996;RPPR=6.33122;RPR=132;RUN=1;SAF=137;SAP=159.369;SAR=28;SRF=473;SRP=60.0081;SRR=328;TYPE=snp;ANN=T|5_prime_UTR_variant|MODI…
chr7B	719753323	G	A	REF	ALT1	5_prime_UTR_variant	MODIFIER	TRIDC7BG070880	AB=0.175439;ABP=159.471;AC=127;AF=0.529167;AN=240;AO=187;CIGAR=1X;DP=1017;DPB=1017;DPRA=0.406118;EPP=3.3006;EPPR=48.5955;GTI=34;LEN=1;MEANALT=1;MQM=69.754;MQMR=70;NS=60;NUMALT=1;ODDS=0.00599503;PAIRED=1;PAIREDR=1;PAO=0;PQA=0;PQR=0;PRO=0;QA=6636;QR=29974;RO=830;RPL=63;RPP=46.2191;RPPR=13.7264;RPR=124;RUN=1;SAF=147;SAP=135.958;SAR=40;SRF=504;SRP=85.903;SRR=326;TYPE=snp;ANN=A|5_prime_UTR_variant|MOD…
chr7B	719753402	GCACACACAC	GCACACACACAC	REF	ALT1	5_prime_UTR_variant	MODIFIER	TRIDC7BG070880	AB=0.431694;ABP=10.4265;AC=125;AF=0.504032;AN=248;AO=228;CIGAR=1M2I9M;DP=1006;DPB=1144.2;DPRA=0.418617;EPP=35.049;EPPR=21.0121;GTI=29;LEN=2;MEANALT=1.10526;MQM=68.4693;MQMR=70;NS=62;NUMALT=1;ODDS=0.075312;PAIRED=1;PAIREDR=1;PAO=99;PQA=2967;PQR=2967;PRO=99;QA=8198;QR=28331;RO=772;RPL=116;RPP=3.16268;RPPR=31.1382;RPR=112;RUN=1;SAF=53;SAP=144.766;SAR=175;SRF=304;SRP=78.663;SRR=468;TYPE=ins;ANN=GCACA…
chr7B	719753423	G	C	REF	ALT1	5_prime_UTR_variant	MODIFIER	TRIDC7BG070880	AB=0.3125;ABP=51.8684;AC=125;AF=0.520833;AN=240;AO=205;CIGAR=1X;DP=1028;DPB=1028;DPRA=0.395937;EPP=9.63064;EPPR=3.17937;GTI=29;LEN=1;MEANALT=1;MQM=67.8049;MQMR=70;NS=60;NUMALT=1;ODDS=0.126461;PAIRED=1;PAIREDR=1;PAO=0;PQA=0;PQR=0;PRO=0;QA=7967;QR=30993;RO=822;RPL=139;RPP=59.458;RPPR=18.2687;RPR=66;RUN=1;SAF=32;SAP=213.601;SAR=173;SRF=250;SRP=276.912;SRR=572;TYPE=snp;ANN=C|5_prime_UTR_variant|MODIF…
chr7B	719753461	C	G	REF	ALT1	5_prime_UTR_variant	MODIFIER	TRIDC7BG070880	AB=0.213675;ABP=86.3243;AC=126;AF=0.525;AN=240;AO=125;CIGAR=1X;DP=780;DPB=780;DPRA=0.294745;EPP=85.7173;EPPR=13.7815;GTI=34;LEN=1;MEANALT=1;MQM=66.776;MQMR=70;NS=60;NUMALT=1;ODDS=0.120941;PAIRED=1;PAIREDR=1;PAO=0;PQA=0;PQR=0;PRO=0;QA=4711;QR=24216;RO=655;RPL=107;RPP=140.612;RPPR=82.6586;RPR=18;RUN=1;SAF=10;SAP=194.534;SAR=115;SRF=144;SRP=449.535;SRR=511;TYPE=snp;ANN=G|5_prime_UTR_variant|MODIFIER…
chr7B	719753470	T	C	REF	ALT1	5_prime_UTR_variant	MODIFIER	TRIDC7BG070880	AB=0.204082;ABP=77.5494;AC=100;AF=0.471698;AN=212;AO=86;CIGAR=1X;DP=677;DPB=677;DPRA=0.307848;EPP=25.735;EPPR=3.01397;GTI=27;LEN=1;MEANALT=1;MQM=65.7907;MQMR=70;NS=53;NUMALT=1;ODDS=0.364256;PAIRED=1;PAIREDR=1;PAO=0;PQA=0;PQR=0;PRO=0;QA=3188;QR=21688;RO=591;RPL=62;RPP=39.4708;RPPR=137.05;RPR=24;RUN=1;SAF=4;SAP=156.629;SAR=82;SRF=123;SRP=440.336;SRR=468;TYPE=snp;ANN=C|5_prime_UTR_variant|MODIFIER|T…
chr7B	719753476	C	T	REF	ALT1	5_prime_UTR_variant	MODIFIER	TRIDC7BG070880	AB=0.173913;ABP=87.981;AC=88;AF=0.44;AN=200;AO=60;CIGAR=1X;DP=613;DPB=613;DPRA=0.308875;EPP=3.58936;EPPR=3.10847;GTI=23;LEN=1;MEANALT=1;MQM=63.5333;MQMR=70;NS=50;NUMALT=1;ODDS=1.14803;PAIRED=1;PAIREDR=1;PAO=0;PQA=0;PQR=0;PRO=0;QA=2211;QR=20127;RO=553;RPL=33;RPP=4.31318;RPPR=123.266;RPR=27;RUN=1;SAF=1;SAP=124.758;SAR=59;SRF=109;SRP=443.686;SRR=444;TYPE=snp;ANN=T|5_prime_UTR_variant|MODIFIER|TRIDC7…
chr7B	719753481	CTGT	GTGC	REF	ALT1	5_prime_UTR_variant	MODIFIER	TRIDC7BG070880	AB=0.277778;ABP=18.4519;AC=78;AF=0.40625;AN=192;AO=46;CIGAR=1X2M1X;DP=523;DPB=538;DPRA=0.300414;EPP=6.03148;EPPR=8.30613;GTI=23;LEN=4;MEANALT=1;MQM=63.6522;MQMR=70;NS=48;NUMALT=1;ODDS=0.00136845;PAIRED=1;PAIREDR=1;PAO=0;PQA=0;PQR=830;PRO=28;QA=1588;QR=17104;RO=474;RPL=19;RPP=6.03148;RPPR=92.8011;RPR=27;RUN=1;SAF=0;SAP=102.898;SAR=46;SRF=73;SRP=495.87;SRR=401;TYPE=complex;ANN=GTGC|5_prime_UTR_vari…
chr7B	719753496	C	T	REF	ALT1	splice_region_variant&synonymous_variant	LOW	TRIDC7BG070880	AB=0.225806;ABP=23.254;AC=69;AF=0.375;AN=184;AO=47;CIGAR=1X;DP=462;DPB=462;DPRA=0.372981;EPP=10.8184;EPPR=56.3867;GTI=18;LEN=1;MEANALT=1;MQM=64.1702;MQMR=70;NS=46;NUMALT=1;ODDS=0.494082;PAIRED=1;PAIREDR=1;PAO=0;PQA=0;PQR=0;PRO=0;QA=1617;QR=15206;RO=415;RPL=17;RPP=10.8184;RPPR=206.077;RPR=30;RUN=1;SAF=0;SAP=105.07;SAR=47;SRF=52;SRP=509.099;SRR=363;TYPE=snp;ANN=T|splice_region_variant&synonymous_va…
chr7B	719753520	G	C	REF	ALT1	synonymous_variant	LOW	TRIDC7BG070880	AB=0.230769;ABP=11.1951;AC=53;AF=0.315476;AN=168;AO=37;CIGAR=1X;DP=275;DPB=275;DPRA=0.579808;EPP=12.9286;EPPR=208.297;GTI=25;LEN=1;MEANALT=1;MQM=65.3243;MQMR=70;NS=42;NUMALT=1;ODDS=2.71466;PAIRED=1;PAIREDR=1;PAO=0;PQA=0;PQR=0;PRO=0;QA=1356;QR=8945;RO=238;RPL=25;RPP=12.9286;RPPR=292.09;RPR=12;RUN=1;SAF=0;SAP=83.3548;SAR=37;SRF=14;SRP=405.371;SRR=224;TYPE=snp;ANN=C|synonymous_variant|LOW|TRIDC7BG07…
chr7B	719754058	CTGA	TTGATGCTTCGTAACCTCGGTTAA	REF	ALT1	5_prime_UTR_variant	MODIFIER	TRIDC7BG070880	AB=0.0833333;ABP=256.349;AC=74;AF=0.402174;AN=184;AO=89;CIGAR=1X2M20I1M;DP=733;DPB=1199;DPRA=0.648671;EPP=32.8985;EPPR=101.066;GTI=21;LEN=24;MEANALT=1.05;MQM=68.1236;MQMR=70;NS=46;NUMALT=1;ODDS=0.293038;PAIRED=1;PAIREDR=1;PAO=4;PQA=0;PQR=921;PRO=32;QA=2941;QR=23789;RO=640;RPL=21;RPP=56.9067;RPPR=3.34959;RPR=68;RUN=1;SAF=81;SAP=133.03;SAR=8;SRF=378;SRP=48.6655;SRR=262;TYPE=complex;ANN=TTGATGCTTCGT…
chr7B	719754065	G	A	REF	ALT1	5_prime_UTR_variant	MODIFIER	TRIDC7BG070880	AB=0.148352;ABP=198.491;AC=94;AF=0.460784;AN=204;AO=163;CIGAR=1X;DP=812;DPB=812;DPRA=0.717535;EPP=3.02362;EPPR=89.7387;GTI=20;LEN=1;MEANALT=1;MQM=67.6196;MQMR=70;NS=51;NUMALT=1;ODDS=2.4263;PAIRED=1;PAIREDR=1;PAO=0;PQA=0;PQR=0;PRO=0;QA=6157;QR=24366;RO=649;RPL=33;RPP=128.356;RPPR=3.76312;RPR=130;RUN=1;SAF=113;SAP=55.885;SAR=50;SRF=372;SRP=33.2068;SRR=277;TYPE=snp;ANN=A|5_prime_UTR_variant|MODIFIER…
chr7B	719754112	A	G	REF	ALT1	5_prime_UTR_premature_start_codon_gain_variant	LOW	TRIDC7BG070880	AB=0.24;ABP=135.123;AC=132;AF=0.540984;AN=244;AO=277;CIGAR=1X;DP=873;DPB=873;DPRA=0.786658;EPP=3.08085;EPPR=3.94615;GTI=25;LEN=1;MEANALT=1.02857;MQM=68.7076;MQMR=70;NS=61;NUMALT=1;ODDS=0.118592;PAIRED=1;PAIREDR=1;PAO=0;PQA=0;PQR=0;PRO=0;QA=10253;QR=21654;RO=594;RPL=145;RPP=4.33513;RPPR=16.1707;RPR=132;RUN=1;SAF=187;SAP=76.7698;SAR=90;SRF=266;SRP=17.0627;SRR=328;TYPE=snp;ANN=G|5_prime_UTR_prematur…
chr7B	719754149	G	A	REF	ALT1	synonymous_variant	LOW	TRIDC7BG070880	AB=0.241107;ABP=150.301;AC=122;AF=0.508333;AN=240;AO=281;CIGAR=1X;DP=836;DPB=836;DPRA=1.14015;EPP=56.2461;EPPR=7.024;GTI=23;LEN=1;MEANALT=1;MQM=65.9822;MQMR=70;NS=60;NUMALT=1;ODDS=0.571836;PAIRED=1;PAIREDR=1;PAO=0;PQA=0;PQR=0;PRO=0;QA=10152;QR=20043;RO=554;RPL=144;RPP=3.38896;RPPR=30.6672;RPR=137;RUN=1;SAF=169;SAP=28.1175;SAR=112;SRF=250;SRP=14.4399;SRR=304;TYPE=snp;ANN=A|synonymous_variant|LOW|T…
chr7B	719754167	T	C	REF	ALT1	synonymous_variant	LOW	TRIDC7BG070880	AB=0.222222;ABP=141.743;AC=128;AF=0.52459;AN=244;AO=232;CIGAR=1X;DP=731;DPB=731;DPRA=0.923338;EPP=30.3035;EPPR=3.6382;GTI=27;LEN=1;MEANALT=1.02941;MQM=65.4052;MQMR=70;NS=61;NUMALT=1;ODDS=0.981182;PAIRED=1;PAIREDR=1;PAO=0;PQA=0;PQR=0;PRO=0;QA=8063;QR=16323;RO=498;RPL=107;RPP=6.04287;RPPR=3.44634;RPR=125;RUN=1;SAF=108;SAP=5.40641;SAR=124;SRF=203;SRP=39.9166;SRR=295;TYPE=snp;ANN=C|synonymous_variant…
chr7B	719754213	G	A	REF	ALT1	splice_region_variant&intron_variant	LOW	TRIDC7BG070880	AB=0.234783;ABP=143.533;AC=115;AF=0.487288;AN=236;AO=250;CIGAR=1X;DP=799;DPB=799;DPRA=1.03157;EPP=4.71273;EPPR=64.8122;GTI=33;LEN=1;MEANALT=1;MQM=61.404;MQMR=70;NS=59;NUMALT=1;ODDS=0.0381235;PAIRED=1;PAIREDR=1;PAO=0;PQA=0;PQR=0;PRO=0;QA=9235;QR=20240;RO=549;RPL=121;RPP=3.5662;RPPR=75.0961;RPR=129;RUN=1;SAF=79;SAP=76.5277;SAR=171;SRF=240;SRP=21.8416;SRR=309;TYPE=snp;ANN=A|splice_region_variant&int…
chr7B	719754241	CATA	CA	REF	ALT1	intron_variant	MODIFIER	TRIDC7BG070880	AB=0.498413;ABP=3.01719;AC=120;AF=0.483871;AN=248;AO=234;CIGAR=1M2D1M;DP=834;DPB=754.75;DPRA=0.684163;EPP=4.34659;EPPR=12.4393;GTI=38;LEN=2;MEANALT=1;MQM=59.641;MQMR=70;NS=62;NUMALT=1;ODDS=0.0266167;PAIRED=1;PAIREDR=1;PAO=25;PQA=455;PQR=1584;PRO=58;QA=8505;QR=22167;RO=599;RPL=69;RPP=88.5329;RPPR=3.10093;RPR=165;RUN=1;SAF=96;SAP=19.3799;SAR=138;SRF=301;SRP=3.04293;SRR=298;TYPE=del;ANN=CA|intron_va…
chr7B	719754257	GCCT	TGCA	REF	ALT1	intron_variant	MODIFIER	TRIDC7BG070880	AB=0.223881;ABP=136.118;AC=125;AF=0.512295;AN=244;AO=255;CIGAR=2X1M1X;DP=871;DPB=886.25;DPRA=0.712803;EPP=38.9886;EPPR=3.43753;GTI=36;LEN=4;MEANALT=1.02941;MQM=60.1529;MQMR=70;NS=61;NUMALT=1;ODDS=0.249677;PAIRED=1;PAIREDR=1;PAO=0;PQA=0;PQR=776;PRO=32;QA=9654;QR=22865;RO=615;RPL=125;RPP=3.22319;RPPR=19.8207;RPR=130;RUN=1;SAF=121;SAP=4.44943;SAR=134;SRF=324;SRP=6.8554;SRR=291;TYPE=complex;ANN=TGCA|…
chr7B	719754265	A	T	REF	ALT1	intron_variant	MODIFIER	TRIDC7BG070880	AB=0.239631;ABP=130.787;AC=129;AF=0.520161;AN=248;AO=298;CIGAR=1X;DP=945;DPB=945;DPRA=0.74102;EPP=17.1176;EPPR=8.6521;GTI=38;LEN=1;MEANALT=1;MQM=61.5738;MQMR=70;NS=62;NUMALT=1;ODDS=0.169497;PAIRED=1;PAIREDR=1;PAO=0;PQA=0;PQR=0;PRO=0;QA=11489;QR=24350;RO=647;RPL=138;RPP=6.53712;RPPR=3.4164;RPR=160;RUN=1;SAF=139;SAP=5.92503;SAR=159;SRF=326;SRP=3.09421;SRR=321;TYPE=snp;ANN=T|intron_variant|MODIFIER|…
chr7B	719754286	AAATA	GAATG	REF	ALT1	intron_variant	MODIFIER	TRIDC7BG070880	AB=0.276596;ABP=84.5098;AC=134;AF=0.531746;AN=252;AO=343;CIGAR=1X3M1X;DP=945;DPB=967.6;DPRA=0.774194;EPP=4.08021;EPPR=3.01391;GTI=31;LEN=5;MEANALT=1.02778;MQM=64.5452;MQMR=70;NS=63;NUMALT=1;ODDS=0.0316193;PAIRED=1;PAIREDR=1;PAO=0;PQA=0;PQR=1208;PRO=39;QA=12734;QR=22693;RO=601;RPL=166;RPP=3.77633;RPPR=3.01391;RPR=177;RUN=1;SAF=152;SAP=12.6395;SAR=191;SRF=276;SRP=11.6854;SRR=325;TYPE=complex;ANN=GA…
chr7B	719754373	C	T	REF	ALT1	synonymous_variant	LOW	TRIDC7BG070880	AB=0.275362;ABP=63.4968;AC=140;AF=0.555556;AN=252;AO=289;CIGAR=1X;DP=838;DPB=838;DPRA=0.6088;EPP=11.1928;EPPR=24.0882;GTI=26;LEN=1;MEANALT=1;MQM=68.5225;MQMR=70;NS=63;NUMALT=1;ODDS=0.0344588;PAIRED=1;PAIREDR=1;PAO=0;PQA=0;PQR=0;PRO=0;QA=10807;QR=20399;RO=549;RPL=157;RPP=7.70639;RPPR=15.8611;RPR=132;RUN=1;SAF=148;SAP=3.37847;SAR=141;SRF=299;SRP=12.507;SRR=250;TYPE=snp;ANN=T|synonymous_variant|LOW|…
chr7B	719754385	GGGA	GGGT	REF	ALT1	synonymous_variant	LOW	TRIDC7BG070880	AB=0.23622;ABP=79.7642;AC=140;AF=0.555556;AN=252;AO=258;CIGAR=3M1X;DP=785;DPB=859.25;DPRA=0.598292;EPP=4.22228;EPPR=17.5746;GTI=34;LEN=1;MEANALT=1.13514;MQM=68.2752;MQMR=70;NS=63;NUMALT=1;ODDS=0.450373;PAIRED=1;PAIREDR=1;PAO=30;PQA=976.5;PQR=2770.5;PRO=92;QA=8235;QR=19046;RO=519;RPL=131;RPP=3.14496;RPPR=9.37409;RPR=127;RUN=1;SAF=144;SAP=10.5852;SAR=114;SRF=291;SRP=19.6164;SRR=228;TYPE=snp;ANN=GGG…
chr7B	719754397	C	G	REF	ALT1	synonymous_variant	LOW	TRIDC7BG070880	AB=0.243056;ABP=85.5866;AC=140;AF=0.555556;AN=252;AO=287;CIGAR=1X;DP=890;DPB=890;DPRA=0.568446;EPP=12.2788;EPPR=24.4324;GTI=36;LEN=1;MEANALT=1.05405;MQM=68.4425;MQMR=70;NS=63;NUMALT=1;ODDS=0.0149515;PAIRED=1;PAIREDR=1;PAO=0;PQA=0;PQR=0;PRO=0;QA=10644;QR=21882;RO=601;RPL=129;RPP=9.3734;RPPR=20.2123;RPR=158;RUN=1;SAF=166;SAP=18.3317;SAR=121;SRF=353;SRP=42.8447;SRR=248;TYPE=snp;ANN=G|synonymous_vari…
chr5B	681189799	T	C	ALT1	REF	synonymous_variant	LOW	TRIDC5BG077010	AB=0.456647;ABP=5.83447;AC=14;AF=0.0546875;AN=256;AO=95;CIGAR=1X;DP=1011;DPB=1011;DPRA=2.38389;EPP=13.0905;EPPR=7.81602;GTI=6;LEN=1;MEANALT=1;MQM=61.0316;MQMR=69.9891;NS=64;NUMALT=1;ODDS=0.527345;PAIRED=1;PAIREDR=1;PAO=0;PQA=0;PQR=0;PRO=0;QA=3375;QR=31141;RO=915;RPL=53;RPP=5.77607;RPPR=10.1892;RPR=42;RUN=1;SAF=70;SAP=49.2969;SAR=25;SRF=697;SRP=547.518;SRR=218;TYPE=snp;ANN=C
chr5B	681189802	G	A	REF	ALT1	synonymous_variant	LOW	TRIDC5BG077010	AB=0.555556;ABP=8.07707;AC=239;AF=0.933594;AN=256;AO=865;CIGAR=1X;DP=965;DPB=965;DPRA=1.91331;EPP=9.0377;EPPR=22.5536;GTI=4;LEN=1;MEANALT=1;MQM=69.9884;MQMR=61.28;NS=64;NUMALT=1;ODDS=0.303652;PAIRED=1;PAIREDR=1;PAO=0;PQA=0;PQR=0;PRO=0;QA=31250;QR=3561;RO=100;RPL=406;RPP=10.0619;RPPR=8.56927;RPR=459;RUN=1;SAF=652;SAP=486.812;SAR=213;SRF=73;SRP=48.9587;SRR=27;TYPE=snp;ANN=A
chr5B	681190105	G	C	ALT1	REF	synonymous_variant	LOW	TRIDC5BG077010	AB=0.347826;ABP=26.1412;AC=15;AF=0.0585938;AN=256;AO=68;CIGAR=1X;DP=1094;DPB=1094;DPRA=1.77434;EPP=4.1599;EPPR=42.2325;GTI=3;LEN=1;MEANALT=1;MQM=70;MQMR=70;NS=64;NUMALT=1;ODDS=0.32517;PAIRED=1;PAIREDR=1;PAO=0;PQA=0;PQR=0;PRO=0;QA=2418;QR=37050;RO=1024;RPL=34;RPP=3.0103;RPPR=19.4321;RPR=34;RUN=1;SAF=27;SAP=9.26925;SAR=41;SRF=432;SRP=57.2971;SRR=592;TYPE=snp;ANN=C
chr5B	681190832	C	T	ALT1	REF	downstream_gene_variant	MODIFIER	TRIDC5BG077000	AB=0.49375;ABP=3.06459;AC=16;AF=0.0625;AN=256;AO=98;CIGAR=1X;DP=986;DPB=986;DPRA=2.18823;EPP=6.20103;EPPR=3.98844;GTI=8;LEN=1;MEANALT=1;MQM=67.9286;MQMR=66.598;NS=64;NUMALT=1;ODDS=0.249218;PAIRED=1;PAIREDR=1;PAO=0;PQA=0;PQR=0;PRO=0;QA=3726;QR=33398;RO=888;RPL=54;RPP=5.22609;RPPR=16.401;RPR=44;RUN=1;SAF=39;SAP=11.8735;SAR=59;SRF=337;SRP=114.998;SRR=551;TYPE=snp;ANN=T
chr5B	681194534	C	G	ALT1	REF	missense_variant	MODERATE	TRIDC5BG077030	AB=0.28;ABP=24.0302;AC=15;AF=0.0625;AN=240;AO=24;CIGAR=1X;DP=312;DPB=312;DPRA=2.61905;EPP=4.45795;EPPR=37.8745;GTI=4;LEN=1;MEANALT=1;MQM=70;MQMR=69.4479;NS=60;NUMALT=1;ODDS=1.13508;PAIRED=1;PAIREDR=1;PAO=0;PQA=0;PQR=0;PRO=0;QA=903;QR=10827;RO=288;RPL=10;RPP=4.45795;RPPR=3.04046;RPR=14;RUN=1;SAF=18;SAP=16.0391;SAR=6;SRF=157;SRP=8.10723;SRR=131;TYPE=snp;ANN=G
chr5B	681194557	G	A	ALT1	REF	missense_variant	MODERATE	TRIDC5BG077030	AB=0.367647;ABP=13.3567;AC=14;AF=0.0583333;AN=240;AO=28;CIGAR=1X;DP=392;DPB=392;DPRA=2.43302;EPP=4.25114;EPPR=126.713;GTI=4;LEN=1;MEANALT=1;MQM=70;MQMR=69.6758;NS=60;NUMALT=1;ODDS=0.729885;PAIRED=1;PAIREDR=1;PAO=0;PQA=0;PQR=0;PRO=0;QA=1054;QR=13690;RO=364;RPL=9;RPP=10.7656;RPPR=60.3038;RPR=19;RUN=1;SAF=19;SAP=10.7656;SAR=9;SRF=249;SRP=110.128;SRR=115;TYPE=snp;ANN=A
chr5B	681194912	GCCG	TCTA	ALT1	REF	missense_variant	MODERATE	TRIDC5BG077030	AB=0.21875;ABP=24.9965;AC=11;AF=0.045082;AN=244;AO=12;CIGAR=1X1M2X;DP=716;DPB=735.5;DPRA=2.30622;EPP=21.1059;EPPR=342.395;GTI=7;LEN=4;MEANALT=1.09091;MQM=24.0833;MQMR=69.2539;NS=61;NUMALT=1;ODDS=3.39562;PAIRED=1;PAIREDR=1;PAO=0;PQA=0;PQR=1072;PRO=37;QA=442;QR=26321;RO=701;RPL=0;RPP=29.068;RPPR=87.3446;RPR=12;RUN=1;SAF=11;SAP=21.1059;SAR=1;SRF=526;SRP=384.647;SRR=175;TYPE=complex;ANN=TCTA
chr5B	681195348	C	T	REF	ALT1	5_prime_UTR_variant	MODIFIER	TRIDC5BG077030	AB=0.566787;ABP=13.7422;AC=238;AF=0.929688;AN=256;AO=954;CIGAR=1X;DP=1111;DPB=1111;DPRA=1.51194;EPP=5.05886;EPPR=3.68802;GTI=11;LEN=1;MEANALT=1;MQM=69.5294;MQMR=69.5987;NS=64;NUMALT=1;ODDS=0.264984;PAIRED=1;PAIREDR=1;PAO=0;PQA=0;PQR=0;PRO=0;QA=35666;QR=5890;RO=157;RPL=458;RPP=6.2971;RPPR=4.68386;RPR=496;RUN=1;SAF=322;SAP=221.751;SAR=632;SRF=48;SRP=54.4756;SRR=109;TYPE=snp;ANN=T
chr5B	681195422	G	A	ALT1	REF	5_prime_UTR_variant	MODIFIER	TRIDC5BG077030	AB=0.40113;ABP=18.0389;AC=16;AF=0.0655738;AN=244;AO=92;CIGAR=1X;DP=813;DPB=813;DPRA=2.95122;EPP=4.52089;EPPR=4.33848;GTI=7;LEN=1;MEANALT=1;MQM=69.3478;MQMR=67.9875;NS=61;NUMALT=1;ODDS=0.303257;PAIRED=1;PAIREDR=1;PAO=0;PQA=0;PQR=0;PRO=0;QA=3434;QR=27130;RO=721;RPL=45;RPP=3.10471;RPPR=5.20587;RPR=47;RUN=1;SAF=29;SAP=30.2953;SAR=63;SRF=245;SRP=163.72;SRR=476;TYPE=snp;ANN=A
chr5B	681195516	G	A	ALT1	REF	splice_region_variant	LOW	TRIDC5BG077030	AB=0.429379;ABP=10.6779;AC=21;AF=0.0860656;AN=244;AO=91;CIGAR=1X;DP=590;DPB=590;DPRA=4.67727;EPP=11.6246;EPPR=54.7122;GTI=7;LEN=1;MEANALT=1;MQM=64.7912;MQMR=65.99;NS=61;NUMALT=1;ODDS=0.277543;PAIRED=1;PAIREDR=1;PAO=0;PQA=0;PQR=0;PRO=0;QA=3464;QR=18795;RO=499;RPL=37;RPP=9.90651;RPPR=3.53685;RPR=54;RUN=1;SAF=54;SAP=9.90651;SAR=37;SRF=292;SRP=34.451;SRR=207;TYPE=snp;ANN=A
chr5B	681195787	A	T	ALT1	REF	upstream_gene_variant	MODIFIER	TRIDC5BG077010	AB=0.371429;ABP=18.0865;AC=14;AF=0.0564516;AN=248;AO=53;CIGAR=1X;DP=501;DPB=501;DPRA=3.55131;EPP=9.93443;EPPR=4.58074;GTI=6;LEN=1;MEANALT=1;MQM=70;MQMR=65.8482;NS=62;NUMALT=1;ODDS=0.176669;PAIRED=1;PAIREDR=1;PAO=0;PQA=0;PQR=0;PRO=0;QA=2059;QR=16946;RO=448;RPL=25;RPP=3.37904;RPPR=3.96032;RPR=28;RUN=1;SAF=25;SAP=3.37904;SAR=28;SRF=222;SRP=3.08785;SRR=226;TYPE=snp;ANN=T
chr5B	681195802	T	C	REF	ALT1	upstream_gene_variant	MODIFIER	TRIDC5BG077010	AB=0.549451;ABP=4.94315;AC=229;AF=0.938525;AN=244;AO=434;CIGAR=1X;DP=493;DPB=493;DPRA=1.36494;EPP=8.79422;EPPR=16.2968;GTI=5;LEN=1;MEANALT=1;MQM=67.5207;MQMR=70;NS=61;NUMALT=1;ODDS=0.218641;PAIRED=1;PAIREDR=1;PAO=0;PQA=0;PQR=0;PRO=0;QA=16278;QR=2211;RO=59;RPL=190;RPP=17.6002;RPPR=3.93042;RPR=244;RUN=1;SAF=222;SAP=3.51064;SAR=212;SRF=27;SRP=3.93042;SRR=32;TYPE=snp;ANN=C
chr5B	681195817	T	C	REF	ALT1	upstream_gene_variant	MODIFIER	TRIDC5BG077010	AB=0.633028;ABP=19.7645;AC=227;AF=0.930328;AN=244;AO=434;CIGAR=1X;DP=493;DPB=493;DPRA=1.44828;EPP=28.9479;EPPR=7.46366;GTI=5;LEN=1;MEANALT=1;MQM=69.0438;MQMR=66.0339;NS=61;NUMALT=1;ODDS=0.0347498;PAIRED=1;PAIREDR=1;PAO=0;PQA=0;PQR=0;PRO=0;QA=15998;QR=2136;RO=59;RPL=213;RPP=3.33052;RPPR=4.81373;RPR=221;RUN=1;SAF=218;SAP=3.03031;SAR=216;SRF=21;SRP=13.6468;SRR=38;TYPE=snp;ANN=C
chr5B	681196081	G	A	REF	ALT1	upstream_gene_variant	MODIFIER	TRIDC5BG077030	AB=0.582278;ABP=7.6556;AC=220;AF=0.916667;AN=240;AO=329;CIGAR=1X;DP=380;DPB=380;DPRA=1.2807;EPP=52.9674;EPPR=8.16222;GTI=7;LEN=1;MEANALT=1;MQM=69.8389;MQMR=62.1961;NS=60;NUMALT=1;ODDS=1.19758;PAIRED=1;PAIREDR=1;PAO=0;PQA=0;PQR=0;PRO=0;QA=12287;QR=1948;RO=51;RPL=179;RPP=8.56109;RPPR=3.3935;RPR=150;RUN=1;SAF=100;SAP=112.845;SAR=229;SRF=20;SRP=8.16222;SRR=31;TYPE=snp;ANN=A
chr5B	681202561	T	C	REF	ALT1	intergenic_region	MODIFIER	TRIDC5BG077030-TRIDC5BG077040	AB=0;ABP=0;AC=20;AF=0.714286;AN=28;AO=6;CIGAR=1X;DP=8;DPB=8;DPRA=1.2;EPP=8.80089;EPPR=3.0103;GTI=1;LEN=1;MEANALT=1;MQM=29.3333;MQMR=10;NS=7;NUMALT=1;ODDS=8.40689;PAIRED=1;PAIREDR=1;PAO=0;PQA=0;PQR=0;PRO=0;QA=226;QR=74;RO=2;RPL=5;RPP=8.80089;RPPR=3.0103;RPR=1;RUN=1;SAF=2;SAP=4.45795;SAR=4;SRF=0;SRP=7.35324;SRR=2;TYPE=snp;ANN=C
chr5B	681323987	G	A	REF	ALT1	intergenic_region	MODIFIER	TRIDC5BG077030-TRIDC5BG077040	AB=0;ABP=0;AC=32;AF=0.8;AN=40;AO=9;CIGAR=1X;DP=11;DPB=11;DPRA=1.125;EPP=9.04217;EPPR=7.35324;GTI=1;LEN=1;MEANALT=1;MQM=70;MQMR=70;NS=10;NUMALT=1;ODDS=4.13928;PAIRED=1;PAIREDR=1;PAO=0;PQA=0;PQR=0;PRO=0;QA=347;QR=79;RO=2;RPL=6;RPP=5.18177;RPPR=7.35324;RPR=3;RUN=1;SAF=3;SAP=5.18177;SAR=6;SRF=2;SRP=7.35324;SRR=0;TYPE=snp;ANN=A
chr5B	681357799	C	T	REF	ALT1	intergenic_region	MODIFIER	TRIDC5BG077030-TRIDC5BG077040	AB=0.658192;ABP=79.9565;AC=160;AF=0.754717;AN=212;AO=299;CIGAR=1X;DP=429;DPB=429;DPRA=6.27976;EPP=3.88906;EPPR=3.61163;GTI=19;LEN=1;MEANALT=1;MQM=69.913;MQMR=44.3923;NS=53;NUMALT=1;ODDS=0.0545134;PAIRED=1;PAIREDR=1;PAO=0;PQA=0;PQR=0;PRO=0;QA=10871;QR=4862;RO=130;RPL=132;RPP=11.9068;RPPR=4.68066;RPR=167;RUN=1;SAF=283;SAP=520.743;SAR=16;SRF=124;SRP=235.592;SRR=6;TYPE=snp;ANN=T
chr5B	681357827	G	T	ALT1	REF	intergenic_region	MODIFIER	TRIDC5BG077030-TRIDC5BG077040	AB=0;ABP=0;AC=4;AF=0.0175439;AN=228;AO=2;CIGAR=1X;DP=531;DPB=531;DPRA=0.21172;EPP=7.35324;EPPR=77.1376;GTI=0;LEN=1;MEANALT=1;MQM=70;MQMR=63.2395;NS=57;NUMALT=1;ODDS=1.59134;PAIRED=1;PAIREDR=1;PAO=0;PQA=0;PQR=0;PRO=0;QA=70;QR=18682;RO=526;RPL=1;RPP=3.0103;RPPR=3.81944;RPR=1;RUN=1;SAF=1;SAP=3.0103;SAR=1;SRF=436;SRP=497.231;SRR=90;TYPE=snp;ANN=T
chr5B	681357849	A	T	ALT1	REF	intergenic_region	MODIFIER	TRIDC5BG077030-TRIDC5BG077040	AB=0.325203;ABP=35.653;AC=15;AF=0.0635593;AN=236;AO=44;CIGAR=1X;DP=600;DPB=600;DPRA=2.89979;EPP=3.79993;EPPR=144;GTI=4;LEN=1;MEANALT=1;MQM=69.75;MQMR=63.7266;NS=59;NUMALT=1;ODDS=0.0268992;PAIRED=1;PAIREDR=1;PAO=0;PQA=0;PQR=0;PRO=0;QA=1543;QR=19354;RO=556;RPL=16;RPP=10.1169;RPPR=17.0702;RPR=28;RUN=1;SAF=28;SAP=10.1169;SAR=16;SRF=383;SRP=175.244;SRR=173;TYPE=snp;ANN=T
chr5B	681357859	C	T	ALT1	REF	intergenic_region	MODIFIER	TRIDC5BG077030-TRIDC5BG077040	AB=0.313433;ABP=43.5228;AC=15;AF=0.0635593;AN=236;AO=47;CIGAR=1X;DP=664;DPB=664;DPRA=2.85943;EPP=3.0565;EPPR=139.595;GTI=5;LEN=1;MEANALT=1;MQM=69.766;MQMR=63.9498;NS=59;NUMALT=1;ODDS=0.255423;PAIRED=1;PAIREDR=1;PAO=0;PQA=0;PQR=0;PRO=0;QA=1732;QR=21833;RO=617;RPL=17;RPP=10.8184;RPPR=33.4496;RPR=30;RUN=1;SAF=28;SAP=6.75262;SAR=19;SRF=388;SRP=91.9844;SRR=229;TYPE=snp;ANN=T
chr5B	681368148	C	A	ALT1	REF	intergenic_region	MODIFIER	TRIDC5BG077030-TRIDC5BG077040	AB=0.3;ABP=13.4334;AC=11;AF=0.0528846;AN=208;AO=13;CIGAR=1X;DP=187;DPB=187;DPRA=2.66667;EPP=3.17734;EPPR=6.20511;GTI=3;LEN=1;MEANALT=1;MQM=70;MQMR=68.2471;NS=52;NUMALT=1;ODDS=2.04787;PAIRED=1;PAIREDR=1;PAO=0;PQA=0;PQR=0;PRO=0;QA=469;QR=6267;RO=174;RPL=3;RPP=11.1951;RPPR=36.7555;RPR=10;RUN=1;SAF=10;SAP=11.1951;SAR=3;SRF=136;SRP=122.866;SRR=38;TYPE=snp;ANN=A
chr5B	681368177	G	A	ALT1	REF	intergenic_region	MODIFIER	TRIDC5BG077030-TRIDC5BG077040	AB=0.392857;ABP=8.59409;AC=11;AF=0.0518868;AN=212;AO=27;CIGAR=1X;DP=287;DPB=287;DPRA=3.30642;EPP=3.09072;EPPR=3.31097;GTI=3;LEN=1;MEANALT=1;MQM=70;MQMR=67.4462;NS=53;NUMALT=1;ODDS=0.967386;PAIRED=1;PAIREDR=1;PAO=0;PQA=0;PQR=0;PRO=0;QA=966;QR=9416;RO=260;RPL=10;RPP=6.95112;RPPR=67.6868;RPR=17;RUN=1;SAF=21;SAP=21.1059;SAR=6;SRF=187;SRP=111.551;SRR=73;TYPE=snp;ANN=A
chr5B	681368422	C	T	REF	ALT1	intergenic_region	MODIFIER	TRIDC5BG077030-TRIDC5BG077040	AB=0.715278;ABP=118.943;AC=193;AF=0.831897;AN=232;AO=319;CIGAR=1X;DP=419;DPB=419;DPRA=1.86574;EPP=3.83396;EPPR=5.18177;GTI=11;LEN=1;MEANALT=1;MQM=63.9875;MQMR=56.82;NS=58;NUMALT=1;ODDS=0.0875324;PAIRED=1;PAIREDR=1;PAO=0;PQA=0;PQR=0;PRO=0;QA=10958;QR=3584;RO=100;RPL=187;RPP=23.6018;RPPR=8.56927;RPR=132;RUN=1;SAF=159;SAP=3.01711;SAR=160;SRF=27;SRP=48.9587;SRR=73;TYPE=snp;ANN=T
chr5B	681368445	G	C	REF	ALT1	intergenic_region	MODIFIER	TRIDC5BG077030-TRIDC5BG077040	AB=0.509259;ABP=3.09072;AC=210;AF=0.9375;AN=224;AO=373;CIGAR=1X;DP=434;DPB=434;DPRA=2.25926;EPP=6.08995;EPPR=3.90025;GTI=6;LEN=1;MEANALT=1;MQM=58.8123;MQMR=70;NS=56;NUMALT=1;ODDS=0.391415;PAIRED=1;PAIREDR=1;PAO=0;PQA=0;PQR=0;PRO=0;QA=13811;QR=2215;RO=61;RPL=178;RPP=4.69275;RPPR=5.89373;RPR=195;RUN=1;SAF=171;SAP=8.6049;SAR=202;SRF=26;SRP=5.89373;SRR=35;TYPE=snp;ANN=C
chr5B	681368688	A	C	ALT1	REF	intergenic_region	MODIFIER	TRIDC5BG077030-TRIDC5BG077040	AB=0.307692;ABP=32.2417;AC=15;AF=0.0604839;AN=248;AO=35;CIGAR=1X;DP=550;DPB=550;DPRA=2.47168;EPP=3.07234;EPPR=7.33635;GTI=4;LEN=1;MEANALT=1;MQM=52.9714;MQMR=52.5817;NS=62;NUMALT=1;ODDS=1.41924;PAIRED=1;PAIREDR=1;PAO=0;PQA=0;PQR=0;PRO=0;QA=1237;QR=17125;RO=514;RPL=14;RPP=6.05036;RPPR=45.2568;RPR=21;RUN=1;SAF=20;SAP=4.56135;SAR=15;SRF=292;SRP=23.7111;SRR=222;TYPE=snp;ANN=C
chr5B	681368706	G	A	ALT1	REF	intergenic_region	MODIFIER	TRIDC5BG077030-TRIDC5BG077040	AB=0.31;ABP=34.3664;AC=15;AF=0.0595238;AN=252;AO=36;CIGAR=1X;DP=594;DPB=594;DPRA=2.4908;EPP=5.18177;EPPR=8.05372;GTI=4;LEN=1;MEANALT=1;MQM=54.3611;MQMR=50.7437;NS=63;NUMALT=1;ODDS=1.39529;PAIRED=1;PAIREDR=1;PAO=0;PQA=0;PQR=0;PRO=0;QA=1272;QR=20073;RO=558;RPL=11;RPP=14.8328;RPPR=81.4791;RPR=25;RUN=1;SAF=20;SAP=3.9754;SAR=16;SRF=317;SRP=25.4878;SRR=241;TYPE=snp;ANN=A
chr5B	681382676	C	T	REF	ALT1	intergenic_region	MODIFIER	TRIDC5BG077030-TRIDC5BG077040	AB=0.666667;ABP=4.45795;AC=79;AF=0.822917;AN=96;AO=41;CIGAR=1X;DP=49;DPB=49;DPRA=1.43333;EPP=4.33437;EPPR=4.09604;GTI=5;LEN=1;MEANALT=1;MQM=70;MQMR=62.75;NS=24;NUMALT=1;ODDS=2.39397;PAIRED=1;PAIREDR=1;PAO=0;PQA=0;PQR=0;PRO=0;QA=1439;QR=275;RO=8;RPL=24;RPP=5.60547;RPPR=7.35324;RPR=17;RUN=1;SAF=13;SAP=14.9269;SAR=28;SRF=5;SRP=4.09604;SRR=3;TYPE=snp;ANN=T
chr5B	681383377	G	A	ALT1	REF	intergenic_region	MODIFIER	TRIDC5BG077030-TRIDC5BG077040	AB=0.428571;ABP=3.63072;AC=14;AF=0.076087;AN=184;AO=9;CIGAR=1X;DP=126;DPB=126;DPRA=1.2789;EPP=3.25157;EPPR=18.6189;GTI=6;LEN=1;MEANALT=1;MQM=70;MQMR=70;NS=46;NUMALT=1;ODDS=0.268085;PAIRED=1;PAIREDR=1;PAO=0;PQA=0;PQR=0;PRO=0;QA=263;QR=3993;RO=117;RPL=5;RPP=3.25157;RPPR=4.51363;RPR=4;RUN=1;SAF=1;SAP=14.8328;SAR=8;SRF=52;SRP=6.14687;SRR=65;TYPE=snp;ANN=A
chr5B	681383401	ACTT	GCTT,GCTA	ALT2	ALT1	intergenic_region	MODIFIER	TRIDC5BG077030-TRIDC5BG077040	AB=0.5,0.5;ABP=3.0103,3.0103;AC=160,16;AF=0.909091,0.0909091;AN=176;AO=95,8;CIGAR=1X3M,1X2M1X;DP=104;DPB=104;DPRA=2.46341,1.11429;EPP=6.87324,7.35324;EPPR=0;GTI=8;LEN=1,4;MEANALT=1.07317,1.4;MQM=70,70;MQMR=0;NS=44;NUMALT=2;ODDS=0.401624;PAIRED=1,1;PAIREDR=0;PAO=0,0;PQA=0,0;PQR=0;PRO=0;QA=3388,283;QR=0;RO=0;RPL=43,5;RPP=4.86177,4.09604;RPPR=0;RPR=52,3;RUN=1,1;SAF=33,1;SAP=22.2335,12.7819;SAR=62,7;…
chr5B	681430771	G	A	ALT1	REF	downstream_gene_variant	MODIFIER	TRIDC5BG077060	AB=0.292683;ABP=18.3165;AC=15;AF=0.0595238;AN=252;AO=19;CIGAR=1X;DP=466;DPB=466;DPRA=1.09091;EPP=3.12459;EPPR=4.41423;GTI=5;LEN=1;MEANALT=1;MQM=70;MQMR=69.8881;NS=63;NUMALT=1;ODDS=0.151362;PAIRED=1;PAIREDR=1;PAO=0;PQA=0;PQR=0;PRO=0;QA=648;QR=15884;RO=447;RPL=7;RPP=5.8675;RPPR=28.8979;RPR=12;RUN=1;SAF=14;SAP=12.2676;SAR=5;SRF=252;SRP=18.7936;SRR=195;TYPE=snp;ANN=A
chr5B	681431342	T	C	REF	ALT1	3_prime_UTR_variant	MODIFIER	TRIDC5BG077060	AB=0.523585;ABP=4.03458;AC=228;AF=0.934426;AN=244;AO=724;CIGAR=1X;DP=835;DPB=835;DPRA=4.26724;EPP=36.7101;EPPR=22.1551;GTI=8;LEN=1;MEANALT=1.03448;MQM=69.8688;MQMR=70;NS=61;NUMALT=1;ODDS=0.367574;PAIRED=1;PAIREDR=1;PAO=0;PQA=0;PQR=0;PRO=0;QA=27527;QR=4099;RO=109;RPL=337;RPP=10.5085;RPPR=13.5489;RPR=387;RUN=1;SAF=476;SAP=158.924;SAR=248;SRF=81;SRP=58.9705;SRR=28;TYPE=snp;ANN=C
chr5B	681432055	C	A	ALT1	REF	3_prime_UTR_variant	MODIFIER	TRIDC5BG077060	AB=0.430605;ABP=38.2716;AC=16;AF=0.0625;AN=256;AO=485;CIGAR=1X;DP=5460;DPB=5460;DPRA=1.2886;EPP=89.5155;EPPR=534.246;GTI=2;LEN=1;MEANALT=1;MQM=70;MQMR=70;NS=64;NUMALT=1;ODDS=0.469063;PAIRED=1;PAIREDR=1;PAO=0;PQA=0;PQR=0;PRO=0;QA=17099;QR=182774;RO=4973;RPL=254;RPP=5.37877;RPPR=277.599;RPR=231;RUN=1;SAF=165;SAP=110.577;SAR=320;SRF=1664;SRP=1184.6;SRR=3309;TYPE=snp;ANN=A
chr5B	681432456	G	A	ALT1	REF	synonymous_variant	LOW	TRIDC5BG077060	AB=0.374384;ABP=30.833;AC=19;AF=0.0742188;AN=256;AO=95;CIGAR=1X;DP=946;DPB=946;DPRA=2.14641;EPP=19.6735;EPPR=49.5145;GTI=7;LEN=1;MEANALT=1;MQM=70;MQMR=69.651;NS=64;NUMALT=1;ODDS=0.436565;PAIRED=1;PAIREDR=1;PAO=0;PQA=0;PQR=0;PRO=0;QA=3426;QR=30706;RO=851;RPL=42;RPP=5.77607;RPPR=11.3007;RPR=53;RUN=1;SAF=73;SAP=62.4629;SAR=22;SRF=670;SRP=613.169;SRR=181;TYPE=snp;ANN=A
chr5B	681432626	G	C	REF	ALT1	missense_variant	MODERATE	TRIDC5BG077060	AB=0.581574;ABP=33.1233;AC=237;AF=0.925781;AN=256;AO=2329;CIGAR=1X;DP=2594;DPB=2594;DPRA=1.74811;EPP=35.6141;EPPR=26.0279;GTI=3;LEN=1;MEANALT=1;MQM=69.2911;MQMR=69.6755;NS=64;NUMALT=1;ODDS=0.715992;PAIRED=1;PAIREDR=1;PAO=0;PQA=0;PQR=0;PRO=0;QA=85224;QR=9449;RO=265;RPL=1092;RPP=22.6132;RPPR=4.39513;RPR=1237;RUN=1;SAF=1425;SAP=256.092;SAR=904;SRF=167;SRP=42.0231;SRR=98;TYPE=snp;ANN=C
chr5B	681432858	C	G	ALT1	REF	splice_region_variant&synonymous_variant	LOW	TRIDC5BG077060	AB=0.380531;ABP=31.0281;AC=15;AF=0.0585938;AN=256;AO=115;CIGAR=1X;DP=1768;DPB=1768;DPRA=1.62921;EPP=23.5732;EPPR=15.3855;GTI=5;LEN=1;MEANALT=1;MQM=69.1217;MQMR=67.7704;NS=64;NUMALT=1;ODDS=1.61122;PAIRED=1;PAIREDR=1;PAO=0;PQA=0;PQR=0;PRO=0;QA=4283;QR=60550;RO=1651;RPL=75;RPP=26.1412;RPPR=95.3735;RPR=40;RUN=1;SAF=39;SAP=28.8603;SAR=76;SRF=566;SRP=357.286;SRR=1085;TYPE=snp;ANN=G
chr5B	681497290	CGTTTTTA	TGTTTTA	REF	ALT1	3_prime_UTR_variant	MODIFIER	TRIDC5BG077070	AB=0;ABP=0;AC=144;AF=0.972973;AN=148;AO=71;CIGAR=1X1M1D5M;DP=73;DPB=89.25;DPRA=2.02857;EPP=8.17902;EPPR=0;GTI=1;LEN=7;MEANALT=1;MQM=38.6479;MQMR=0;NS=37;NUMALT=1;ODDS=9.03183;PAIRED=1;PAIREDR=0;PAO=24;PQA=760;PQR=0;PRO=0;QA=1932;QR=0;RO=0;RPL=71;RPP=157.185;RPPR=0;RPR=0;RUN=1;SAF=42;SAP=8.17902;SAR=29;SRF=0;SRP=0;SRR=0;TYPE=complex;ANN=TGTTTTA
chr5B	681499528	C	T	REF	ALT1	missense_variant	MODERATE	TRIDC5BG077080	AB=0.402655;ABP=21.6119;AC=170;AF=0.674603;AN=252;AO=294;CIGAR=1X;DP=527;DPB=527;DPRA=1.36798;EPP=4.45795;EPPR=13.1594;GTI=19;LEN=1;MEANALT=1;MQM=53.466;MQMR=52.8026;NS=63;NUMALT=1;ODDS=0.142663;PAIRED=1;PAIREDR=1;PAO=0;PQA=0;PQR=0;PRO=0;QA=10407;QR=8198;RO=233;RPL=122;RPP=21.4752;RPPR=18.6766;RPR=172;RUN=1;SAF=202;SAP=92.3804;SAR=92;SRF=160;SRP=73.5505;SRR=73;TYPE=snp;ANN=T
chr5B	681530501	C	G	ALT1	REF	downstream_gene_variant	MODIFIER	TRIDC5BG077100	AB=0.382353;ABP=11.1853;AC=12;AF=0.0576923;AN=208;AO=28;CIGAR=1X;DP=306;DPB=306;DPRA=3.55932;EPP=14.1779;EPPR=15.508;GTI=3;LEN=1;MEANALT=1;MQM=68.7143;MQMR=68.3165;NS=52;NUMALT=1;ODDS=1.97768;PAIRED=1;PAIREDR=1;PAO=0;PQA=0;PQR=0;PRO=0;QA=1090;QR=10475;RO=278;RPL=8;RPP=14.1779;RPPR=39.1286;RPR=20;RUN=1;SAF=28;SAP=63.8115;SAR=0;SRF=254;SRP=416.215;SRR=24;TYPE=snp;ANN=G
chr5B	681530531	AA	AT,GT	ALT2	ALT1	downstream_gene_variant	MODIFIER	TRIDC5BG077100	AB=0.657534,0.342466;ABP=18.746,18.746;AC=201,15;AF=0.930556,0.0694444;AN=216;AO=321,28;CIGAR=1M1X,2X;DP=349;DPB=354;DPRA=6.78431,2.72821;EPP=3.82883,4.25114;EPPR=0;GTI=4;LEN=1,2;MEANALT=1.03922,1.4;MQM=66.0156,63.9286;MQMR=0;NS=54;NUMALT=2;ODDS=1.97907;PAIRED=1,1;PAIREDR=0;PAO=5,0;PQA=148,0;PQR=148;PRO=5;QA=11983,971;QR=0;RO=0;RPL=137,11;RPP=17.9535,5.80219;RPPR=0;RPR=184,17;RUN=1,1;SAF=283,27;S…
chr5B	681530800	A	G	ALT1	REF	downstream_gene_variant	MODIFIER	TRIDC5BG077100	AB=0.4;ABP=5.61607;AC=16;AF=0.166667;AN=96;AO=18;CIGAR=1X;DP=106;DPB=106;DPRA=1.95429;EPP=10.7311;EPPR=42.4916;GTI=4;LEN=1;MEANALT=1;MQM=70;MQMR=70;NS=24;NUMALT=1;ODDS=2.6152;PAIRED=1;PAIREDR=1;PAO=0;PQA=0;PQR=0;PRO=0;QA=676;QR=3219;RO=88;RPL=9;RPP=3.0103;RPPR=25.2185;RPR=9;RUN=1;SAF=8;SAP=3.49285;SAR=10;SRF=17;SRP=74.965;SRR=71;TYPE=snp;ANN=G
chr5B	681535332	G	A	REF	ALT1	upstream_gene_variant	MODIFIER	TRIDC5BG077100	AB=0.690476;ABP=16.2459;AC=223;AF=0.899194;AN=248;AO=224;CIGAR=1X;DP=263;DPB=263;DPRA=1.32626;EPP=204.027;EPPR=63.6445;GTI=8;LEN=1;MEANALT=1;MQM=65.1429;MQMR=27.2051;NS=62;NUMALT=1;ODDS=1.26454;PAIRED=1;PAIREDR=1;PAO=0;PQA=0;PQR=0;PRO=0;QA=8345;QR=1384;RO=39;RPL=130;RPP=15.5738;RPPR=3.51141;RPR=94;RUN=1;SAF=114;SAP=3.16541;SAR=110;SRF=22;SRP=4.40227;SRR=17;TYPE=snp;ANN=A
chr5B	681535411	C	A	REF	ALT1	upstream_gene_variant	MODIFIER	TRIDC5BG077100	AB=0.666667;ABP=3.73412;AC=203;AF=0.939815;AN=216;AO=115;CIGAR=1X;DP=124;DPB=124;DPRA=0.852941;EPP=44.7215;EPPR=5.18177;GTI=3;LEN=1;MEANALT=1;MQM=65.513;MQMR=70;NS=54;NUMALT=1;ODDS=3.60913;PAIRED=1;PAIREDR=1;PAO=0;PQA=0;PQR=0;PRO=0;QA=4447;QR=348;RO=9;RPL=83;RPP=52.1233;RPPR=9.04217;RPR=32;RUN=1;SAF=4;SAP=219.195;SAR=111;SRF=1;SRP=14.8328;SRR=8;TYPE=snp;ANN=A
chr5B	681561863	G	A	REF	ALT1	intergenic_region	MODIFIER	TRIDC5BG077120-TRIDC5BG077130	AB=0.433962;ABP=5.01789;AC=59;AF=0.359756;AN=164;AO=41;CIGAR=1X;DP=110;DPB=110;DPRA=1.70393;EPP=36.112;EPPR=3.04177;GTI=21;LEN=1;MEANALT=1;MQM=44.5122;MQMR=48.7101;NS=41;NUMALT=1;ODDS=0.139031;PAIRED=1;PAIREDR=1;PAO=0;PQA=0;PQR=0;PRO=0;QA=1507;QR=2659;RO=69;RPL=23;RPP=4.33437;RPPR=12.1053;RPR=18;RUN=1;SAF=31;SAP=26.3669;SAR=10;SRF=30;SRP=5.55942;SRR=39;TYPE=snp;ANN=A
chr5B	681561872	T	C	REF	ALT1	intergenic_region	MODIFIER	TRIDC5BG077120-TRIDC5BG077130	AB=0.846154;ABP=16.5402;AC=146;AF=0.935897;AN=156;AO=91;CIGAR=1X;DP=99;DPB=99;DPRA=0.837838;EPP=3.60686;EPPR=3.0103;GTI=3;LEN=1;MEANALT=1;MQM=45.2418;MQMR=63.125;NS=39;NUMALT=1;ODDS=2.15401;PAIRED=1;PAIREDR=1;PAO=0;PQA=0;PQR=0;PRO=0;QA=3492;QR=309;RO=8;RPL=51;RPP=5.89764;RPPR=4.09604;RPR=40;RUN=1;SAF=50;SAP=4.94315;SAR=41;SRF=3;SRP=4.09604;SRR=5;TYPE=snp;ANN=C
chr5B	681561941	GGG	CGG,TGG,CGA	REF	ALT3	intergenic_region	MODIFIER	TRIDC5BG077120-TRIDC5BG077130	AB=0.230769,0.231579,0.193182;ABP=68.4885,62.4629,74.965;AC=32,16,19;AF=0.258065,0.129032,0.153226;AN=124;AO=29,22,20;CIGAR=1X2M,1X2M,1X1M1X;DP=135;DPB=135.667;DPRA=5.20956,8.15657,6.38235;EPP=6.67934,3.0103,6.91895;EPPR=7.78754;GTI=21;LEN=1,1,3;MEANALT=2.3125,3.11111,2.5;MQM=57.5862,55.4545,54.1;MQMR=62.4545;NS=31;NUMALT=3;ODDS=0.726009;PAIRED=1,1,1;PAIREDR=1;PAO=0.333333,0.333333,0;PQA=10.3333,…
chr5B	681562567	T	C	ALT1	REF	intergenic_region	MODIFIER	TRIDC5BG077120-TRIDC5BG077130	AB=0.184116;ABP=243.087;AC=14;AF=0.0555556;AN=252;AO=65;CIGAR=1X;DP=1588;DPB=1588;DPRA=2.41627;EPP=31.1058;EPPR=140.118;GTI=3;LEN=1;MEANALT=1;MQM=69.8308;MQMR=46.4671;NS=63;NUMALT=1;ODDS=0.201043;PAIRED=1;PAIREDR=1;PAO=0;PQA=0;PQR=0;PRO=0;QA=2310;QR=55394;RO=1522;RPL=37;RPP=5.71629;RPPR=158.38;RPR=28;RUN=1;SAF=31;SAP=3.31097;SAR=34;SRF=556;SRP=242.842;SRR=966;TYPE=snp;ANN=C
chr5B	681562673	A	G	REF	ALT1	intergenic_region	MODIFIER	TRIDC5BG077120-TRIDC5BG077130	AB=0.691781;ABP=49.6523;AC=229;AF=0.938525;AN=244;AO=601;CIGAR=1X;DP=654;DPB=654;DPRA=2.73729;EPP=134.82;EPPR=3.05127;GTI=4;LEN=1;MEANALT=1;MQM=45.8519;MQMR=64.5849;NS=61;NUMALT=1;ODDS=0.841528;PAIRED=1;PAIREDR=1;PAO=0;PQA=0;PQR=0;PRO=0;QA=22743;QR=2010;RO=53;RPL=294;RPP=3.62091;RPPR=3.05127;RPR=307;RUN=1;SAF=182;SAP=205.954;SAR=419;SRF=25;SRP=3.37904;SRR=28;TYPE=snp;ANN=G
chr5B	681563472	G	T	REF	ALT1	intergenic_region	MODIFIER	TRIDC5BG077120-TRIDC5BG077130	AB=0.330769;ABP=35.3485;AC=47;AF=0.261111;AN=180;AO=52;CIGAR=1X;DP=191;DPB=191;DPRA=2.9233;EPP=40.5935;EPPR=11.2744;GTI=18;LEN=1;MEANALT=1;MQM=38.4808;MQMR=69.0144;NS=45;NUMALT=1;ODDS=0.107292;PAIRED=1;PAIREDR=1;PAO=0;PQA=0;PQR=0;PRO=0;QA=1907;QR=5167;RO=139;RPL=1;RPP=107.408;RPPR=46.8928;RPR=51;RUN=1;SAF=42;SAP=45.7716;SAR=10;SRF=85;SRP=18.0231;SRR=54;TYPE=snp;ANN=T
chr5B	681563822	C	T	REF	ALT1	intergenic_region	MODIFIER	TRIDC5BG077120-TRIDC5BG077130	AB=0.518;ABP=4.41741;AC=172;AF=0.716667;AN=240;AO=375;CIGAR=1X;DP=637;DPB=637;DPRA=3.25926;EPP=66.8516;EPPR=127.319;GTI=13;LEN=1;MEANALT=1.01852;MQM=59.536;MQMR=43.5615;NS=60;NUMALT=1;ODDS=0.0231692;PAIRED=1;PAIREDR=1;PAO=0;PQA=0;PQR=0;PRO=0;QA=13770;QR=9805;RO=260;RPL=197;RPP=5.1007;RPPR=195.971;RPR=178;RUN=1;SAF=138;SAP=59.7639;SAR=237;SRF=43;SRP=255.87;SRR=217;TYPE=snp;ANN=T
chr5B	681573731	T	C	REF	ALT1	intergenic_region	MODIFIER	TRIDC5BG077120-TRIDC5BG077130	AB=0.7;ABP=6.48466;AC=53;AF=0.779412;AN=68;AO=21;CIGAR=1X;DP=32;DPB=32;DPRA=0.923077;EPP=3.1137;EPPR=3.25157;GTI=9;LEN=1;MEANALT=1;MQM=38.8095;MQMR=21.6667;NS=17;NUMALT=1;ODDS=7.13591;PAIRED=1;PAIREDR=1;PAO=0;PQA=0;PQR=0;PRO=0;QA=780;QR=342;RO=9;RPL=10;RPP=3.1137;RPPR=14.8328;RPR=11;RUN=1;SAF=21;SAP=48.6112;SAR=0;SRF=4;SRP=3.25157;SRR=5;TYPE=snp;ANN=C
chr5B	681574841	G	A	ALT1	REF	intergenic_region	MODIFIER	TRIDC5BG077120-TRIDC5BG077130	AB=0.338028;ABP=19.1893;AC=11;AF=0.05;AN=220;AO=28;CIGAR=1X;DP=327;DPB=327;DPRA=2.97619;EPP=18.2106;EPPR=39.6203;GTI=3;LEN=1;MEANALT=1;MQM=54.4286;MQMR=52.7826;NS=55;NUMALT=1;ODDS=1.86409;PAIRED=1;PAIREDR=1;PAO=0;PQA=0;PQR=0;PRO=0;QA=902;QR=10520;RO=299;RPL=15;RPP=3.32051;RPPR=37.5868;RPR=13;RUN=1;SAF=14;SAP=3.0103;SAR=14;SRF=116;SRP=35.6114;SRR=183;TYPE=snp;ANN=A
chr5B	681574865	G	A	REF	ALT1	intergenic_region	MODIFIER	TRIDC5BG077120-TRIDC5BG077130	AB=0.610526;ABP=13.0905;AC=185;AF=0.856481;AN=216;AO=206;CIGAR=1X;DP=262;DPB=262;DPRA=1.02316;EPP=5.70883;EPPR=3.16541;GTI=12;LEN=1;MEANALT=1;MQM=52.4951;MQMR=47.1429;NS=54;NUMALT=1;ODDS=0.0231218;PAIRED=1;PAIREDR=1;PAO=0;PQA=0;PQR=0;PRO=0;QA=7195;QR=2001;RO=56;RPL=127;RPP=27.2971;RPPR=18.5208;RPR=79;RUN=1;SAF=54;SAP=104.247;SAR=152;SRF=25;SRP=4.40625;SRR=31;TYPE=snp;ANN=A
chr5B	681574885	GG	CA,CG	ALT2	ALT1	intergenic_region	MODIFIER	TRIDC5BG077120-TRIDC5BG077130	AB=0.264706,0.735294;ABP=19.3602,19.3602;AC=183,17;AF=0.915,0.085;AN=200;AO=155,36;CIGAR=2X,1X1M;DP=191;DPB=192;DPRA=1.04449,2.77397;EPP=5.37791,3.0103;EPPR=0;GTI=4;LEN=2,1;MEANALT=1.04255,1.4;MQM=49.8968,50.6111;MQMR=0;NS=50;NUMALT=2;ODDS=4.63476;PAIRED=1,1;PAIREDR=0;PAO=0,1;PQA=0,0;PQR=0;PRO=1;QA=5752,1237;QR=0;RO=0;RPL=98,16;RPP=26.5603,3.9754;RPPR=0;RPR=57,20;RUN=1,1;SAF=24,12;SAP=163.405,11.…
chr5B	681576658	G	A	REF	ALT1	intergenic_region	MODIFIER	TRIDC5BG077120-TRIDC5BG077130	AB=0.426926;ABP=55.3738;AC=107;AF=0.424603;AN=252;AO=488;CIGAR=1X;DP=1182;DPB=1182;DPRA=3.51257;EPP=3.0281;EPPR=46.5774;GTI=11;LEN=1;MEANALT=1;MQM=49.2213;MQMR=38.451;NS=63;NUMALT=1;ODDS=0.0915169;PAIRED=1;PAIREDR=1;PAO=0;PQA=0;PQR=0;PRO=0;QA=18365;QR=25743;RO=694;RPL=286;RPP=34.4077;RPPR=27.2407;RPR=202;RUN=1;SAF=113;SAP=308.458;SAR=375;SRF=175;SRP=373.275;SRR=519;TYPE=snp;ANN=A
chr5B	681577350	A	G	REF	ALT1	intergenic_region	MODIFIER	TRIDC5BG077120-TRIDC5BG077130	AB=0.5;ABP=3.0103;AC=194;AF=0.898148;AN=216;AO=204;CIGAR=1X;DP=297;DPB=297;DPRA=0.675481;EPP=11.3556;EPPR=9.75821;GTI=9;LEN=1;MEANALT=1;MQM=27.3235;MQMR=46.4516;NS=54;NUMALT=1;ODDS=0.0442572;PAIRED=1;PAIREDR=1;PAO=0;PQA=0;PQR=0;PRO=0;QA=7501;QR=3266;RO=93;RPL=103;RPP=3.05288;RPPR=13.3073;RPR=101;RUN=1;SAF=15;SAP=325.282;SAR=189;SRF=19;SRP=73.6415;SRR=74;TYPE=snp;ANN=G
chr5B	681577805	C	T	REF	ALT1	intergenic_region	MODIFIER	TRIDC5BG077120-TRIDC5BG077130	AB=0.291667;ABP=12.0581;AC=16;AF=0.153846;AN=104;AO=13;CIGAR=1X;DP=66;DPB=66;DPRA=2.2619;EPP=7.18621;EPPR=14.851;GTI=6;LEN=1;MEANALT=1;MQM=33.0769;MQMR=39.8113;NS=26;NUMALT=1;ODDS=4.70003;PAIRED=1;PAIREDR=1;PAO=0;PQA=0;PQR=0;PRO=0;QA=507;QR=2009;RO=53;RPL=4;RPP=7.18621;RPPR=12.2288;RPR=9;RUN=1;SAF=13;SAP=31.2394;SAR=0;SRF=46;SRP=65.3275;SRR=7;TYPE=snp;ANN=T
chr5B	681577937	C	A	REF	ALT1	intergenic_region	MODIFIER	TRIDC5BG077120-TRIDC5BG077130	AB=0.45098;ABP=4.07475;AC=68;AF=0.607143;AN=112;AO=53;CIGAR=1X;DP=92;DPB=92;DPRA=2.94545;EPP=6.32897;EPPR=3.51141;GTI=14;LEN=1;MEANALT=1;MQM=30.1132;MQMR=50.6923;NS=28;NUMALT=1;ODDS=0.121484;PAIRED=1;PAIREDR=1;PAO=0;PQA=0;PQR=0;PRO=0;QA=1968;QR=1420;RO=39;RPL=16;RPP=21.0786;RPPR=7.52028;RPR=37;RUN=1;SAF=32;SAP=7.96781;SAR=21;SRF=19;SRP=3.06598;SRR=20;TYPE=snp;ANN=A
chr5B	681587385	G	A	ALT1	REF	intergenic_region	MODIFIER	TRIDC5BG077120-TRIDC5BG077130	AB=0.545455;ABP=3.79993;AC=15;AF=0.0635593;AN=236;AO=28;CIGAR=1X;DP=217;DPB=217;DPRA=3.06746;EPP=4.25114;EPPR=9.08812;GTI=4;LEN=1;MEANALT=1;MQM=67.0714;MQMR=52.1693;NS=59;NUMALT=1;ODDS=1.35185;PAIRED=1;PAIREDR=1;PAO=0;PQA=0;PQR=0;PRO=0;QA=1051;QR=7068;RO=189;RPL=11;RPP=5.80219;RPPR=35.2837;RPR=17;RUN=1;SAF=13;SAP=3.32051;SAR=15;SRF=74;SRP=22.3238;SRR=115;TYPE=snp;ANN=A
chr5B	681587394	A	G	REF	ALT1	intergenic_region	MODIFIER	TRIDC5BG077120-TRIDC5BG077130	AB=0.4;ABP=6.91895;AC=200;AF=0.925926;AN=216;AO=162;CIGAR=1X;DP=193;DPB=193;DPRA=1.81731;EPP=3.06392;EPPR=8.68415;GTI=5;LEN=1;MEANALT=1;MQM=50.4321;MQMR=67.3548;NS=54;NUMALT=1;ODDS=0.021763;PAIRED=1;PAIREDR=1;PAO=0;PQA=0;PQR=0;PRO=0;QA=6011;QR=1148;RO=31;RPL=105;RPP=33.8935;RPPR=3.08035;RPR=57;RUN=1;SAF=59;SAP=28.9607;SAR=103;SRF=16;SRP=3.08035;SRR=15;TYPE=snp;ANN=G
chr5B	681587479	A	G	REF	ALT1	intergenic_region	MODIFIER	TRIDC5BG077120-TRIDC5BG077130	AB=0.659898;ABP=46.7594;AC=161;AF=0.71875;AN=224;AO=193;CIGAR=1X;DP=268;DPB=268;DPRA=4.64286;EPP=25.7939;EPPR=42.6469;GTI=30;LEN=1;MEANALT=1;MQM=53.6943;MQMR=37.3333;NS=56;NUMALT=1;ODDS=0.141384;PAIRED=1;PAIREDR=1;PAO=0;PQA=0;PQR=0;PRO=0;QA=7306;QR=2836;RO=75;RPL=96;RPP=3.02155;RPPR=3.27088;RPR=97;RUN=1;SAF=123;SAP=34.6148;SAR=70;SRF=36;SRP=3.27088;SRR=39;TYPE=snp;ANN=G
chr5B	681587551	C	T	ALT1	REF	intergenic_region	MODIFIER	TRIDC5BG077120-TRIDC5BG077130	AB=0.4;ABP=8.22183;AC=11;AF=0.0458333;AN=240;AO=28;CIGAR=1X;DP=346;DPB=346;DPRA=3.1773;EPP=3.0103;EPPR=44.5551;GTI=3;LEN=1;MEANALT=1;MQM=59.1429;MQMR=47.5975;NS=60;NUMALT=1;ODDS=0.95394;PAIRED=1;PAIREDR=1;PAO=0;PQA=0;PQR=0;PRO=0;QA=1062;QR=11684;RO=318;RPL=13;RPP=3.32051;RPPR=5.22274;RPR=15;RUN=1;SAF=15;SAP=3.32051;SAR=13;SRF=190;SRP=29.2592;SRR=128;TYPE=snp;ANN=T
chr5B	681587664	GCG	TCG	REF	ALT1	intergenic_region	MODIFIER	TRIDC5BG077120-TRIDC5BG077130	AB=0.510067;ABP=3.14146;AC=184;AF=0.766667;AN=240;AO=223;CIGAR=1X2M;DP=327;DPB=330.333;DPRA=1.76705;EPP=12.3681;EPPR=3.03223;GTI=29;LEN=1;MEANALT=1.07273;MQM=60.0762;MQMR=37.7677;NS=60;NUMALT=1;ODDS=0.0756039;PAIRED=1;PAIREDR=1;PAO=1.5;PQA=30.5;PQR=125.5;PRO=4.5;QA=7949;QR=3550;RO=99;RPL=154;RPP=73.3641;RPPR=21.4568;RPR=69;RUN=1;SAF=97;SAP=11.1996;SAR=126;SRF=58;SRP=9.34924;SRR=41;TYPE=snp;ANN=TCG
chr5B	681587808	T	C	REF	ALT1	intergenic_region	MODIFIER	TRIDC5BG077120-TRIDC5BG077130	AB=0.585227;ABP=14.1144;AC=118;AF=0.614583;AN=192;AO=130;CIGAR=1X;DP=228;DPB=228;DPRA=2.97101;EPP=16.1059;EPPR=17.989;GTI=34;LEN=1;MEANALT=1;MQM=48.7538;MQMR=36.6939;NS=48;NUMALT=1;ODDS=0.0616553;PAIRED=1;PAIREDR=1;PAO=0;PQA=0;PQR=0;PRO=0;QA=5066;QR=3657;RO=98;RPL=84;RPP=27.1303;RPPR=6.20103;RPR=46;RUN=1;SAF=63;SAP=3.27756;SAR=67;SRF=55;SRP=6.20103;SRR=43;TYPE=snp;ANN=C
chr5B	681587870	G	A	REF	ALT1	intergenic_region	MODIFIER	TRIDC5BG077120-TRIDC5BG077130	AB=0.467532;ABP=3.71532;AC=179;AF=0.913265;AN=196;AO=213;CIGAR=1X;DP=268;DPB=268;DPRA=1.18323;EPP=33.8493;EPPR=4.94488;GTI=6;LEN=1;MEANALT=1;MQM=43.9953;MQMR=63.6182;NS=49;NUMALT=1;ODDS=0.225015;PAIRED=1;PAIREDR=1;PAO=0;PQA=0;PQR=0;PRO=0;QA=8164;QR=2032;RO=55;RPL=45;RPP=157.246;RPPR=3.36563;RPR=168;RUN=1;SAF=161;SAP=124.134;SAR=52;SRF=30;SRP=3.99733;SRR=25;TYPE=snp;ANN=A
chr5B	681587884	G	A	REF	ALT1	intergenic_region	MODIFIER	TRIDC5BG077120-TRIDC5BG077130	AB=0.452632;ABP=4.86177;AC=180;AF=0.882353;AN=204;AO=220;CIGAR=1X;DP=287;DPB=287;DPRA=1.65957;EPP=3.04978;EPPR=5.63551;GTI=8;LEN=1;MEANALT=1;MQM=48.2364;MQMR=59.0597;NS=51;NUMALT=1;ODDS=0.0121941;PAIRED=1;PAIREDR=1;PAO=0;PQA=0;PQR=0;PRO=0;QA=8110;QR=2410;RO=67;RPL=63;RPP=90.2245;RPPR=3.04271;RPR=157;RUN=1;SAF=158;SAP=93.9753;SAR=62;SRF=39;SRP=6.93191;SRR=28;TYPE=snp;ANN=A
chr5B	681588376	A	G	REF	ALT1	intergenic_region	MODIFIER	TRIDC5BG077120-TRIDC5BG077130	AB=0.363636;ABP=4.78696;AC=117;AF=0.860294;AN=136;AO=71;CIGAR=1X;DP=114;DPB=114;DPRA=1.47926;EPP=8.17902;EPPR=19.7617;GTI=7;LEN=1;MEANALT=1.03226;MQM=59.9155;MQMR=69.2857;NS=34;NUMALT=1;ODDS=0.18074;PAIRED=1;PAIREDR=1;PAO=0;PQA=0;PQR=0;PRO=0;QA=2667;QR=1629;RO=42;RPL=48;RPP=22.1254;RPPR=3.21711;RPR=23;RUN=1;SAF=16;SAP=49.5287;SAR=55;SRF=24;SRP=4.87156;SRR=18;TYPE=snp;ANN=G
chr5B	681588386	T	C	REF	ALT1	intergenic_region	MODIFIER	TRIDC5BG077120-TRIDC5BG077130	AB=0.571429;ABP=3.94093;AC=113;AF=0.856061;AN=132;AO=66;CIGAR=1X;DP=110;DPB=110;DPRA=1.47143;EPP=9.45891;EPPR=6.16881;GTI=5;LEN=1;MEANALT=1;MQM=57.3182;MQMR=68.9545;NS=33;NUMALT=1;ODDS=0.343032;PAIRED=1;PAIREDR=1;PAO=0;PQA=0;PQR=0;PRO=0;QA=2433;QR=1590;RO=44;RPL=34;RPP=3.1419;RPPR=6.16881;RPR=32;RUN=1;SAF=20;SAP=25.2514;SAR=46;SRF=24;SRP=3.79993;SRR=20;TYPE=snp;ANN=C
chr5B	681588426	C	T	REF	ALT1	intergenic_region	MODIFIER	TRIDC5BG077120-TRIDC5BG077130	AB=0.55102;ABP=5.22609;AC=102;AF=0.653846;AN=156;AO=85;CIGAR=1X;DP=147;DPB=147;DPRA=2.15;EPP=41.8669;EPPR=3.57068;GTI=20;LEN=1;MEANALT=1;MQM=57.2471;MQMR=53.0484;NS=39;NUMALT=1;ODDS=0.287419;PAIRED=1;PAIREDR=1;PAO=0;PQA=0;PQR=0;PRO=0;QA=3252;QR=2346;RO=62;RPL=24;RPP=37.9838;RPPR=11.9764;RPR=61;RUN=1;SAF=50;SAP=8.75832;SAR=35;SRF=42;SRP=19.9618;SRR=20;TYPE=snp;ANN=T
chr5B	681588480	GCTGC	GTTGC	REF	ALT1	intergenic_region	MODIFIER	TRIDC5BG077120-TRIDC5BG077130	AB=0.5625;ABP=4.6389;AC=138;AF=0.734043;AN=188;AO=134;CIGAR=1M1X3M;DP=213;DPB=217.8;DPRA=1.97949;EPP=5.34382;EPPR=3.90025;GTI=26;LEN=1;MEANALT=1.23077;MQM=64.209;MQMR=59.5082;NS=47;NUMALT=1;ODDS=0.536312;PAIRED=1;PAIREDR=1;PAO=6.5;PQA=174.5;PQR=208.5;PRO=7.5;QA=5008;QR=2305;RO=61;RPL=66;RPP=3.07512;RPPR=4.7546;RPR=68;RUN=1;SAF=87;SAP=28.9383;SAR=47;SRF=36;SRP=7.31765;SRR=25;TYPE=snp;ANN=GTTGC
chr5B	681589132	C	T	REF	ALT1	intergenic_region	MODIFIER	TRIDC5BG077120-TRIDC5BG077130	AB=0.285714;ABP=8.59409;AC=71;AF=0.845238;AN=84;AO=24;CIGAR=1X;DP=36;DPB=36;DPRA=1.78947;EPP=12.0581;EPPR=9.52472;GTI=7;LEN=1;MEANALT=1;MQM=56.4167;MQMR=59.5;NS=21;NUMALT=1;ODDS=0.445015;PAIRED=1;PAIREDR=1;PAO=0;PQA=0;PQR=0;PRO=0;QA=875;QR=447;RO=12;RPL=17;RPP=12.0581;RPPR=9.52472;RPR=7;RUN=1;SAF=2;SAP=39.2015;SAR=22;SRF=2;SRP=14.5915;SRR=10;TYPE=snp;ANN=T
chr5B	681589472	G	A	REF	ALT1	intergenic_region	MODIFIER	TRIDC5BG077120-TRIDC5BG077130	AB=0.5;ABP=3.0103;AC=74;AF=0.770833;AN=96;AO=31;CIGAR=1X;DP=44;DPB=44;DPRA=0.701754;EPP=23.254;EPPR=4.51363;GTI=11;LEN=1;MEANALT=1;MQM=36.3871;MQMR=44.2308;NS=24;NUMALT=1;ODDS=0.416859;PAIRED=1;PAIREDR=1;PAO=0;PQA=0;PQR=0;PRO=0;QA=1185;QR=492;RO=13;RPL=6;RPP=28.2974;RPPR=7.18621;RPR=25;RUN=1;SAF=28;SAP=46.79;SAR=3;SRF=8;SRP=4.51363;SRR=5;TYPE=snp;ANN=A
chr5B	681589488	C	G	REF	ALT1	intergenic_region	MODIFIER	TRIDC5BG077120-TRIDC5BG077130	AB=0.666667;ABP=3.73412;AC=79;AF=0.79;AN=100;AO=42;CIGAR=1X;DP=56;DPB=56;DPRA=0.826923;EPP=3.21711;EPPR=3.63072;GTI=10;LEN=1;MEANALT=1;MQM=39.4524;MQMR=43.3571;NS=25;NUMALT=1;ODDS=1.54334;PAIRED=1;PAIREDR=1;PAO=0;PQA=0;PQR=0;PRO=0;QA=1574;QR=547;RO=14;RPL=16;RPP=8.18047;RPPR=5.49198;RPR=26;RUN=1;SAF=34;SAP=37.9607;SAR=8;SRF=7;SRP=3.0103;SRR=7;TYPE=snp;ANN=G
chr5B	681591111	T	C	REF	ALT1	intergenic_region	MODIFIER	TRIDC5BG077120-TRIDC5BG077130	AB=0.538462;ABP=3.17734;AC=8;AF=0.111111;AN=72;AO=9;CIGAR=1X;DP=100;DPB=100;DPRA=2.2377;EPP=22.5536;EPPR=25.942;GTI=4;LEN=1;MEANALT=1;MQM=32.5556;MQMR=38.0769;NS=18;NUMALT=1;ODDS=0.431857;PAIRED=1;PAIREDR=1;PAO=0;PQA=0;PQR=0;PRO=0;QA=364;QR=3338;RO=91;RPL=0;RPP=22.5536;RPPR=97.7199;RPR=9;RUN=1;SAF=9;SAP=22.5536;SAR=0;SRF=49;SRP=4.17955;SRR=42;TYPE=snp;ANN=C
chr5B	681591660	A	G	REF	ALT1	intergenic_region	MODIFIER	TRIDC5BG077120-TRIDC5BG077130	AB=0.138889;ABP=43.7857;AC=38;AF=0.452381;AN=84;AO=16;CIGAR=1X;DP=67;DPB=67;DPRA=2.29665;EPP=37.7539;EPPR=3.40914;GTI=16;LEN=1;MEANALT=1.18182;MQM=30.875;MQMR=47.9592;NS=21;NUMALT=1;ODDS=1.8678;PAIRED=1;PAIREDR=1;PAO=0;PQA=0;PQR=0;PRO=0;QA=637;QR=1850;RO=49;RPL=0;RPP=37.7539;RPPR=5.18177;RPR=16;RUN=1;SAF=16;SAP=37.7539;SAR=0;SRF=31;SRP=10.4997;SRR=18;TYPE=snp;ANN=G
chr5B	681591667	A	C,G	REF	ALT1	intergenic_region	MODIFIER	TRIDC5BG077120-TRIDC5BG077130	AB=0.102564,0.1875;ABP=56.5176,16.582;AC=46,25;AF=0.46,0.25;AN=100;AO=17,10;CIGAR=1X,1X;DP=74;DPB=74;DPRA=2.32967,2.15873;EPP=39.9253,3.87889;EPPR=5.73856;GTI=30;LEN=1,1;MEANALT=1.30769,1.42857;MQM=30.7647,21.3;MQMR=56.6923;NS=25;NUMALT=2;ODDS=3.88326;PAIRED=1,1;PAIREDR=1;PAO=0,0;PQA=0,0;PQR=0;PRO=0;QA=625,351;QR=1480;RO=39;RPL=0,8;RPP=39.9253,10.8276;RPPR=3.06598;RPR=17,2;RUN=1,1;SAF=17,8;SAP=39…
chr5B	681591706	A	G	ALT1	REF	intergenic_region	MODIFIER	TRIDC5BG077120-TRIDC5BG077130	AB=0.537037;ABP=3.6537;AC=24;AF=0.139535;AN=172;AO=42;CIGAR=1X;DP=148;DPB=148;DPRA=4.25397;EPP=3.83753;EPPR=92.2455;GTI=5;LEN=1;MEANALT=1;MQM=48.0476;MQMR=29.8019;NS=43;NUMALT=1;ODDS=3.95238;PAIRED=1;PAIREDR=1;PAO=0;PQA=0;PQR=0;PRO=0;QA=1599;QR=4076;RO=106;RPL=20;RPP=3.21711;RPPR=92.2455;RPR=22;RUN=1;SAF=23;SAP=3.83753;SAR=19;SRF=106;SRP=233.186;SRR=0;TYPE=snp;ANN=G
chr5B	681591748	A	G	REF	ALT1	intergenic_region	MODIFIER	TRIDC5BG077120-TRIDC5BG077130	AB=0.5625;ABP=4.6389;AC=161;AF=0.875;AN=184;AO=141;CIGAR=1X;DP=173;DPB=173;DPRA=2.51524;EPP=4.87376;EPPR=3.29983;GTI=6;LEN=1;MEANALT=1.04878;MQM=30.5674;MQMR=42.8333;NS=46;NUMALT=1;ODDS=1.74974;PAIRED=1;PAIREDR=1;PAO=0;PQA=0;PQR=0;PRO=0;QA=5328;QR=1142;RO=30;RPL=73;RPP=3.39531;RPPR=44.7026;RPR=68;RUN=1;SAF=138;SAP=283.685;SAR=3;SRF=17;SRP=4.16842;SRR=13;TYPE=snp;ANN=G
chr5B	681591892	CG	CA	REF	ALT1	intergenic_region	MODIFIER	TRIDC5BG077120-TRIDC5BG077130	AB=0.57732;ABP=13.0841;AC=147;AF=0.644737;AN=228;AO=163;CIGAR=1M1X;DP=276;DPB=278;DPRA=3.23455;EPP=128.356;EPPR=9.32731;GTI=42;LEN=1;MEANALT=1.34783;MQM=37.1104;MQMR=29.9773;NS=57;NUMALT=1;ODDS=0.174975;PAIRED=1;PAIREDR=1;PAO=2;PQA=66.5;PQR=66.5;PRO=2;QA=6167;QR=3329;RO=88;RPL=78;RPP=3.66307;RPPR=59.8634;RPR=85;RUN=1;SAF=91;SAP=7.81951;SAR=72;SRF=48;SRP=4.58955;SRR=40;TYPE=snp;ANN=CA
chr5B	681592762	A	G	REF	ALT1	intergenic_region	MODIFIER	TRIDC5BG077120-TRIDC5BG077130	AB=0.5;ABP=3.0103;AC=84;AF=0.875;AN=96;AO=53;CIGAR=1X;DP=65;DPB=65;DPRA=1.38636;EPP=4.03458;EPPR=3.73412;GTI=7;LEN=1;MEANALT=1;MQM=40;MQMR=70;NS=24;NUMALT=1;ODDS=1.99202;PAIRED=1;PAIREDR=1;PAO=0;PQA=0;PQR=0;PRO=0;QA=1981;QR=467;RO=12;RPL=34;RPP=12.2288;RPPR=3.73412;RPR=19;RUN=1;SAF=28;SAP=3.37904;SAR=25;SRF=2;SRP=14.5915;SRR=10;TYPE=snp;ANN=G
chr5B	681593147	A	T	ALT1	REF	intergenic_region	MODIFIER	TRIDC5BG077120-TRIDC5BG077130	AB=0.521739;ABP=3.19912;AC=12;AF=0.0833333;AN=144;AO=27;CIGAR=1X;DP=144;DPB=144;DPRA=4.12632;EPP=3.09072;EPPR=9.71031;GTI=3;LEN=1;MEANALT=1;MQM=70;MQMR=46.2051;NS=36;NUMALT=1;ODDS=0.286384;PAIRED=1;PAIREDR=1;PAO=0;PQA=0;PQR=0;PRO=0;QA=1011;QR=4297;RO=117;RPL=14;RPP=3.09072;RPPR=5.25601;RPR=13;RUN=1;SAF=14;SAP=3.09072;SAR=13;SRF=68;SRP=9.71031;SRR=49;TYPE=snp;ANN=T
chr5B	681593148	T	C	REF	ALT1	intergenic_region	MODIFIER	TRIDC5BG077120-TRIDC5BG077130	AB=0.554217;ABP=5.12945;AC=106;AF=0.736111;AN=144;AO=95;CIGAR=1X;DP=141;DPB=141;DPRA=4.01293;EPP=5.77607;EPPR=6.03148;GTI=10;LEN=1;MEANALT=1;MQM=48.2632;MQMR=56.1522;NS=36;NUMALT=1;ODDS=0.724614;PAIRED=1;PAIREDR=1;PAO=0;PQA=0;PQR=0;PRO=0;QA=3525;QR=1746;RO=46;RPL=55;RPP=8.15326;RPPR=3.19912;RPR=40;RUN=1;SAF=50;SAP=3.58174;SAR=45;SRF=31;SRP=15.095;SRR=15;TYPE=snp;ANN=C
chr5B	681593398	T	C	REF	ALT1	intergenic_region	MODIFIER	TRIDC5BG077120-TRIDC5BG077130	AB=0.84;ABP=103.419;AC=195;AF=0.9375;AN=208;AO=189;CIGAR=1X;DP=206;DPB=206;DPRA=4.01961;EPP=11.386;EPPR=4.1599;GTI=5;LEN=1;MEANALT=1;MQM=63.0847;MQMR=62.8235;NS=52;NUMALT=1;ODDS=0.0129183;PAIRED=1;PAIREDR=1;PAO=0;PQA=0;PQR=0;PRO=0;QA=6798;QR=595;RO=17;RPL=101;RPP=4.95199;RPPR=6.20364;RPR=88;RUN=1;SAF=88;SAP=4.95199;SAR=101;SRF=16;SRP=31.7504;SRR=1;TYPE=snp;ANN=C
chr5B	681593424	G	A	ALT1	REF	intergenic_region	MODIFIER	TRIDC5BG077120-TRIDC5BG077130	AB=0.161616;ABP=101.472;AC=13;AF=0.065;AN=200;AO=18;CIGAR=1X;DP=194;DPB=194;DPRA=4.34409;EPP=15.074;EPPR=5.42853;GTI=3;LEN=1;MEANALT=1;MQM=64.4444;MQMR=63.7784;NS=50;NUMALT=1;ODDS=0.196213;PAIRED=1;PAIREDR=1;PAO=0;PQA=0;PQR=0;PRO=0;QA=629;QR=6497;RO=176;RPL=8;RPP=3.49285;RPPR=10.1169;RPR=10;RUN=1;SAF=12;SAP=7.35324;SAR=6;SRF=63;SRP=33.8551;SRR=113;TYPE=snp;ANN=A
chr5B	681593467	C	T	ALT1	REF	intergenic_region	MODIFIER	TRIDC5BG077120-TRIDC5BG077130	AB=0.216867;ABP=60.8029;AC=21;AF=0.11413;AN=184;AO=20;CIGAR=1X;DP=147;DPB=147;DPRA=3.13364;EPP=6.91895;EPPR=3.43776;GTI=4;LEN=1;MEANALT=1;MQM=50.9;MQMR=69.9134;NS=46;NUMALT=1;ODDS=0.318905;PAIRED=1;PAIREDR=1;PAO=0;PQA=0;PQR=0;PRO=0;QA=733;QR=4612;RO=127;RPL=17;RPP=24.2907;RPPR=5.8999;RPR=3;RUN=1;SAF=10;SAP=3.0103;SAR=10;SRF=39;SRP=44.0631;SRR=88;TYPE=snp;ANN=T
chr5B	681593486	C	T	ALT1	REF	intergenic_region	MODIFIER	TRIDC5BG077120-TRIDC5BG077130	AB=0.181818;ABP=61.0478;AC=13;AF=0.0722222;AN=180;AO=13;CIGAR=1X;DP=134;DPB=134;DPRA=4;EPP=4.51363;EPPR=3.88966;GTI=5;LEN=1;MEANALT=1;MQM=57.0769;MQMR=68.4545;NS=45;NUMALT=1;ODDS=0.221026;PAIRED=1;PAIREDR=1;PAO=0;PQA=0;PQR=0;PRO=0;QA=485;QR=4368;RO=121;RPL=8;RPP=4.51363;RPPR=12.5038;RPR=5;RUN=1;SAF=4;SAP=7.18621;SAR=9;SRF=40;SRP=33.1776;SRR=81;TYPE=snp;ANN=T
chr5B	681593957	C	T	ALT1	REF	intergenic_region	MODIFIER	TRIDC5BG077120-TRIDC5BG077130	AB=0.333333;ABP=10.9724;AC=9;AF=0.0401786;AN=224;AO=12;CIGAR=1X;DP=181;DPB=181;DPRA=3.0068;EPP=9.52472;EPPR=4.56502;GTI=3;LEN=1;MEANALT=1;MQM=67.5833;MQMR=64.7811;NS=56;NUMALT=1;ODDS=0.859295;PAIRED=1;PAIREDR=1;PAO=0;PQA=0;PQR=0;PRO=0;QA=432;QR=6055;RO=169;RPL=5;RPP=3.73412;RPPR=4.56502;RPR=7;RUN=1;SAF=4;SAP=5.9056;SAR=8;SRF=45;SRP=83.2006;SRR=124;TYPE=snp;ANN=T
chr5B	681595191	G	A	REF	ALT1	intergenic_region	MODIFIER	TRIDC5BG077120-TRIDC5BG077130	AB=0.679104;ABP=40.3467;AC=219;AF=0.9125;AN=240;AO=460;CIGAR=1X;DP=518;DPB=518;DPRA=1.89474;EPP=184.357;EPPR=12.5947;GTI=7;LEN=1;MEANALT=1;MQM=60.137;MQMR=60.9138;NS=60;NUMALT=1;ODDS=1.09649;PAIRED=1;PAIREDR=1;PAO=0;PQA=0;PQR=0;PRO=0;QA=16776;QR=2090;RO=58;RPL=271;RPP=34.7516;RPPR=3.0103;RPR=189;RUN=1;SAF=251;SAP=11.3374;SAR=209;SRF=30;SRP=3.16006;SRR=28;TYPE=snp;ANN=A
chr5B	681595263	A	G	REF	ALT1	intergenic_region	MODIFIER	TRIDC5BG077120-TRIDC5BG077130	AB=0.595745;ABP=6.75262;AC=204;AF=0.927273;AN=220;AO=296;CIGAR=1X;DP=322;DPB=322;DPRA=2.59615;EPP=36.9322;EPPR=8.35546;GTI=4;LEN=1;MEANALT=1;MQM=68.1182;MQMR=70;NS=55;NUMALT=1;ODDS=2.21475;PAIRED=1;PAIREDR=1;PAO=0;PQA=0;PQR=0;PRO=0;QA=10457;QR=943;RO=26;RPL=180;RPP=33.0588;RPPR=8.35546;RPR=116;RUN=1;SAF=84;SAP=123.204;SAR=212;SRF=10;SRP=6.01695;SRR=16;TYPE=snp;ANN=G
chr5B	681595310	G	A	REF	ALT1	intergenic_region	MODIFIER	TRIDC5BG077120-TRIDC5BG077130	AB=0.577778;ABP=5.37479;AC=213;AF=0.950893;AN=224;AO=259;CIGAR=1X;DP=282;DPB=282;DPRA=2.57407;EPP=13.2808;EPPR=3.10471;GTI=3;LEN=1;MEANALT=1;MQM=69.166;MQMR=70;NS=56;NUMALT=1;ODDS=1.83659;PAIRED=1;PAIREDR=1;PAO=0;PQA=0;PQR=0;PRO=0;QA=9627;QR=834;RO=23;RPL=120;RPP=6.03695;RPPR=5.3706;RPR=139;RUN=1;SAF=119;SAP=6.70767;SAR=140;SRF=12;SRP=3.10471;SRR=11;TYPE=snp;ANN=A
chr5B	681595363	G	A	REF	ALT1	intergenic_region	MODIFIER	TRIDC5BG077120-TRIDC5BG077130	AB=0.405941;ABP=10.7717;AC=146;AF=0.651786;AN=224;AO=121;CIGAR=1X;DP=237;DPB=237;DPRA=1.40888;EPP=3.02825;EPPR=9.07545;GTI=20;LEN=1;MEANALT=1;MQM=69.2314;MQMR=69.2845;NS=56;NUMALT=1;ODDS=0.385096;PAIRED=1;PAIREDR=1;PAO=0;PQA=0;PQR=0;PRO=0;QA=4302;QR=4078;RO=116;RPL=65;RPP=4.46393;RPPR=12.0706;RPR=56;RUN=1;SAF=65;SAP=4.46393;SAR=56;SRF=68;SRP=10.4981;SRR=48;TYPE=snp;ANN=A
chr5B	681596471	A	G	REF	ALT1	intergenic_region	MODIFIER	TRIDC5BG077120-TRIDC5BG077130	AB=0.666667;ABP=5.18177;AC=76;AF=0.863636;AN=88;AO=39;CIGAR=1X;DP=45;DPB=45;DPRA=1.4;EPP=19.1015;EPPR=4.45795;GTI=3;LEN=1;MEANALT=1;MQM=65.1795;MQMR=70;NS=22;NUMALT=1;ODDS=1.11295;PAIRED=1;PAIREDR=1;PAO=0;PQA=0;PQR=0;PRO=0;QA=1462;QR=228;RO=6;RPL=9;RPP=27.5646;RPPR=3.0103;RPR=30;RUN=1;SAF=29;SAP=23.1103;SAR=10;SRF=3;SRP=3.0103;SRR=3;TYPE=snp;ANN=G
chr5B	681596484	G	A	REF	ALT1	intergenic_region	MODIFIER	TRIDC5BG077120-TRIDC5BG077130	AB=0.7;ABP=9.95901;AC=87;AF=0.776786;AN=112;AO=48;CIGAR=1X;DP=60;DPB=60;DPRA=1.95652;EPP=24.906;EPPR=9.52472;GTI=11;LEN=1;MEANALT=1;MQM=67.6458;MQMR=59.4167;NS=28;NUMALT=1;ODDS=0.175253;PAIRED=1;PAIREDR=1;PAO=0;PQA=0;PQR=0;PRO=0;QA=1797;QR=412;RO=12;RPL=10;RPP=38.4777;RPPR=9.52472;RPR=38;RUN=1;SAF=39;SAP=43.7254;SAR=9;SRF=8;SRP=5.9056;SRR=4;TYPE=snp;ANN=A
chr5B	681596496	C	T	ALT1	REF	intergenic_region	MODIFIER	TRIDC5BG077120-TRIDC5BG077130	AB=0.333333;ABP=5.18177;AC=15;AF=0.133929;AN=112;AO=7;CIGAR=1X;DP=67;DPB=67;DPRA=1.10741;EPP=10.7656;EPPR=20.5268;GTI=4;LEN=1;MEANALT=1;MQM=70;MQMR=64.1333;NS=28;NUMALT=1;ODDS=1.63906;PAIRED=1;PAIREDR=1;PAO=0;PQA=0;PQR=0;PRO=0;QA=255;QR=2233;RO=60;RPL=2;RPP=5.80219;RPPR=49.9141;RPR=5;RUN=1;SAF=4;SAP=3.32051;SAR=3;SRF=47;SRP=44.8473;SRR=13;TYPE=snp;ANN=T
chr5B	681596516	ATTTTTTA	ATTTTTTTA	ALT1	REF	intergenic_region	MODIFIER	TRIDC5BG077120-TRIDC5BG077130	AB=0.285714;ABP=5.80219;AC=13;AF=0.0928571;AN=140;AO=6;CIGAR=1M1I7M;DP=88;DPB=95.125;DPRA=1.10714;EPP=4.45795;EPPR=3.12459;GTI=3;LEN=1;MEANALT=1;MQM=70;MQMR=65.3947;NS=35;NUMALT=1;ODDS=2.03057;PAIRED=1;PAIREDR=1;PAO=6;PQA=201.5;PQR=201.5;PRO=6;QA=223;QR=2852;RO=76;RPL=2;RPP=4.45795;RPPR=10.3247;RPR=4;RUN=1;SAF=4;SAP=4.45795;SAR=2;SRF=59;SRP=53.4113;SRR=17;TYPE=ins;ANN=ATTTTTTTA
chr5B	681596679	C	T	REF	ALT1	intergenic_region	MODIFIER	TRIDC5BG077120-TRIDC5BG077130	AB=0.656028;ABP=62.6411;AC=176;AF=0.758621;AN=232;AO=262;CIGAR=1X;DP=388;DPB=388;DPRA=1.16786;EPP=27.1783;EPPR=30.5846;GTI=16;LEN=1;MEANALT=1;MQM=50.771;MQMR=59.2063;NS=58;NUMALT=1;ODDS=0.699587;PAIRED=1;PAIREDR=1;PAO=0;PQA=0;PQR=0;PRO=0;QA=9632;QR=4584;RO=126;RPL=107;RPP=22.106;RPPR=18.5208;RPR=155;RUN=1;SAF=183;SAP=92.654;SAR=79;SRF=71;SRP=7.42218;SRR=55;TYPE=snp;ANN=T
chr5B	681596725	C	T	REF	ALT1	intergenic_region	MODIFIER	TRIDC5BG077120-TRIDC5BG077130	AB=0.675676;ABP=62.5204;AC=196;AF=0.803279;AN=244;AO=263;CIGAR=1X;DP=367;DPB=367;DPRA=1.1824;EPP=5.99091;EPPR=4.04333;GTI=15;LEN=1;MEANALT=1.01818;MQM=45.3916;MQMR=58.8544;NS=61;NUMALT=1;ODDS=0.115115;PAIRED=1;PAIREDR=1;PAO=0;PQA=0;PQR=0;PRO=0;QA=9210;QR=3748;RO=103;RPL=155;RPP=21.249;RPPR=41.9914;RPR=108;RUN=1;SAF=147;SAP=10.9448;SAR=116;SRF=39;SRP=16.1867;SRR=64;TYPE=snp;ANN=T
chr5B	681596845	A	G	ALT1	REF	intergenic_region	MODIFIER	TRIDC5BG077120-TRIDC5BG077130	AB=0.492754;ABP=3.04177;AC=14;AF=0.0729167;AN=192;AO=38;CIGAR=1X;DP=308;DPB=308;DPRA=2.67149;EPP=8.7247;EPPR=38.0434;GTI=5;LEN=1;MEANALT=1;MQM=60.7368;MQMR=48.2444;NS=48;NUMALT=1;ODDS=0.0229811;PAIRED=1;PAIREDR=1;PAO=0;PQA=0;PQR=0;PRO=0;QA=1437;QR=10049;RO=270;RPL=25;RPP=11.239;RPPR=134.778;RPR=13;RUN=1;SAF=9;SAP=25.8679;SAR=29;SRF=77;SRP=111.23;SRR=193;TYPE=snp;ANN=G
chr5B	681596862	G	A	ALT1	REF	intergenic_region	MODIFIER	TRIDC5BG077120-TRIDC5BG077130	AB=0.441558;ABP=5.29458;AC=16;AF=0.0833333;AN=192;AO=45;CIGAR=1X;DP=291;DPB=291;DPRA=6.82927;EPP=16.956;EPPR=36.9418;GTI=4;LEN=1;MEANALT=1;MQM=59.8222;MQMR=47.2154;NS=48;NUMALT=1;ODDS=0.00380768;PAIRED=1;PAIREDR=1;PAO=0;PQA=0;PQR=0;PRO=0;QA=1602;QR=8904;RO=246;RPL=34;RPP=28.5372;RPPR=109.818;RPR=11;RUN=1;SAF=9;SAP=38.1882;SAR=36;SRF=66;SRP=117.728;SRR=180;TYPE=snp;ANN=A
chr5B	681601035	G	A	ALT1	REF	downstream_gene_variant	MODIFIER	TRIDC5BG077130	AB=0.34;ABP=14.1282;AC=40;AF=0.222222;AN=180;AO=24;CIGAR=1X;DP=111;DPB=111;DPRA=1.70213;EPP=39.2015;EPPR=84.1036;GTI=21;LEN=1;MEANALT=1;MQM=21.125;MQMR=29.7471;NS=45;NUMALT=1;ODDS=7.07073;PAIRED=1;PAIREDR=1;PAO=0;PQA=0;PQR=0;PRO=0;QA=888;QR=3126;RO=87;RPL=1;RPP=46.8017;RPPR=102.074;RPR=23;RUN=1;SAF=1;SAP=46.8017;SAR=23;SRF=5;SRP=150.995;SRR=82;TYPE=snp;ANN=A
chr5B	681603939	C	T	ALT1	REF	downstream_gene_variant	MODIFIER	TRIDC5BG077130	AB=0.292683;ABP=18.3165;AC=29;AF=0.18125;AN=160;AO=17;CIGAR=1X;DP=107;DPB=107;DPRA=1.98808;EPP=24.5973;EPPR=114.576;GTI=12;LEN=1;MEANALT=1;MQM=28.3529;MQMR=29.1333;NS=40;NUMALT=1;ODDS=7.3058;PAIRED=1;PAIREDR=1;PAO=0;PQA=0;PQR=0;PRO=0;QA=583;QR=3281;RO=90;RPL=15;RPP=24.5973;RPPR=121.235;RPR=2;RUN=1;SAF=17;SAP=39.9253;SAR=0;SRF=81;SRP=128.087;SRR=9;TYPE=snp;ANN=T
chr5B	681604198	T	C	ALT1	REF	3_prime_UTR_variant	MODIFIER	TRIDC5BG077130	AB=0.393586;ABP=36.7473;AC=79;AF=0.334746;AN=236;AO=139;CIGAR=1X;DP=403;DPB=403;DPRA=3.13679;EPP=231.734;EPPR=386.769;GTI=35;LEN=1;MEANALT=1;MQM=24.8849;MQMR=28.8712;NS=59;NUMALT=1;ODDS=0.0520102;PAIRED=1;PAIREDR=1;PAO=0;PQA=0;PQR=0;PRO=0;QA=5400;QR=9944;RO=264;RPL=130;RPP=231.734;RPPR=386.769;RPR=9;RUN=1;SAF=0;SAP=304.845;SAR=139;SRF=2;SRP=559.039;SRR=262;TYPE=snp;ANN=C
chr5B	681612664	T	C,A	ALT1	ALT2	intergenic_region	MODIFIER	TRIDC5BG077130-TRIDC5BG077140	AB=0.75,0.25;ABP=22.5536,22.5536;AC=138,26;AF=0.841463,0.158537;AN=164;AO=144,21;CIGAR=1X,1X;DP=165;DPB=165;DPRA=2.86486,3.0724;EPP=24.7853,26.2761;EPPR=0;GTI=10;LEN=1,1;MEANALT=1.24324,1.69231;MQM=67.1597,26.4286;MQMR=0;NS=41;NUMALT=2;ODDS=2.0875;PAIRED=1,1;PAIREDR=0;PAO=0,0;PQA=0,0;PQR=0;PRO=0;QA=5412,786;QR=0;RO=0;RPL=54,12;RPP=22.5536,3.94093;RPPR=0;RPR=90,9;RUN=1,1;SAF=93,11;SAP=29.6108,3.11…
chr5B	681612675	C	T	ALT1	REF	intergenic_region	MODIFIER	TRIDC5BG077130-TRIDC5BG077140	AB=0.25;ABP=22.5536;AC=15;AF=0.0892857;AN=168;AO=14;CIGAR=1X;DP=198;DPB=198;DPRA=1.93248;EPP=5.49198;EPPR=9.80795;GTI=5;LEN=1;MEANALT=1;MQM=67.1429;MQMR=62.2554;NS=42;NUMALT=1;ODDS=1.92136;PAIRED=1;PAIREDR=1;PAO=0;PQA=0;PQR=0;PRO=0;QA=518;QR=6843;RO=184;RPL=4;RPP=8.59409;RPPR=25.858;RPR=10;RUN=1;SAF=9;SAP=5.49198;SAR=5;SRF=110;SRP=18.305;SRR=74;TYPE=snp;ANN=T
chr5B	681612706	G	A	REF	ALT1	intergenic_region	MODIFIER	TRIDC5BG077130-TRIDC5BG077140	AB=0.277778;ABP=10.7311;AC=9;AF=0.0424528;AN=212;AO=11;CIGAR=1X;DP=230;DPB=230;DPRA=4.32787;EPP=4.78696;EPPR=14.5251;GTI=5;LEN=1;MEANALT=1;MQM=26.3636;MQMR=65.5688;NS=53;NUMALT=1;ODDS=5.90195;PAIRED=1;PAIREDR=1;PAO=0;PQA=0;PQR=0;PRO=0;QA=418;QR=8014;RO=218;RPL=8;RPP=7.94546;RPPR=4.96263;RPR=3;RUN=1;SAF=1;SAP=19.0002;SAR=10;SRF=124;SRP=11.9751;SRR=94;TYPE=snp;ANN=A
chr5B	681612796	T	C	REF	ALT1	intergenic_region	MODIFIER	TRIDC5BG077130-TRIDC5BG077140	AB=0.542857;ABP=4.12706;AC=234;AF=0.928571;AN=252;AO=394;CIGAR=1X;DP=443;DPB=443;DPRA=1.42667;EPP=25.5848;EPPR=4.16534;GTI=4;LEN=1;MEANALT=1.03333;MQM=48.4188;MQMR=68.8298;NS=63;NUMALT=1;ODDS=1.21531;PAIRED=1;PAIREDR=1;PAO=0;PQA=0;PQR=0;PRO=0;QA=14741;QR=1701;RO=47;RPL=170;RPP=19.0814;RPPR=6.75262;RPR=224;RUN=1;SAF=317;SAP=320.464;SAR=77;SRF=35;SRP=27.4509;SRR=12;TYPE=snp;ANN=C
chr5B	681612839	T	C	REF	ALT1	intergenic_region	MODIFIER	TRIDC5BG077130-TRIDC5BG077140	AB=0.55;ABP=5.18177;AC=241;AF=0.941406;AN=256;AO=627;CIGAR=1X;DP=694;DPB=694;DPRA=1.65738;EPP=20.4687;EPPR=8.65613;GTI=4;LEN=1;MEANALT=1.03279;MQM=56.8676;MQMR=69.7692;NS=64;NUMALT=1;ODDS=0.0920533;PAIRED=1;PAIREDR=1;PAO=0;PQA=0;PQR=0;PRO=0;QA=23210;QR=2362;RO=65;RPL=191;RPP=210.893;RPPR=3.84548;RPR=436;RUN=1;SAF=474;SAP=359.869;SAR=153;SRF=44;SRP=20.6827;SRR=21;TYPE=snp;ANN=C
chr5B	681612870	C	T	ALT1	REF	intergenic_region	MODIFIER	TRIDC5BG077130-TRIDC5BG077140	AB=0.380282;ABP=20.6879;AC=14;AF=0.0546875;AN=256;AO=69;CIGAR=1X;DP=1068;DPB=1068;DPRA=1.93333;EPP=3.04177;EPPR=3.11681;GTI=5;LEN=1;MEANALT=1;MQM=63.7681;MQMR=55.6587;NS=64;NUMALT=1;ODDS=0.0631154;PAIRED=1;PAIREDR=1;PAO=0;PQA=0;PQR=0;PRO=0;QA=2558;QR=36689;RO=999;RPL=20;RPP=29.4771;RPPR=194.745;RPR=49;RUN=1;SAF=41;SAP=8.32883;SAR=28;SRF=692;SRP=325.199;SRR=307;TYPE=snp;ANN=T
chr5B	681613307	G	A	ALT1	REF	intergenic_region	MODIFIER	TRIDC5BG077130-TRIDC5BG077140	AB=0.166667;ABP=95.6598;AC=13;AF=0.0560345;AN=232;AO=23;CIGAR=1X;DP=500;DPB=500;DPRA=3.06885;EPP=18.9659;EPPR=24.6841;GTI=8;LEN=1;MEANALT=1;MQM=42.8261;MQMR=68.5409;NS=58;NUMALT=1;ODDS=1.4617;PAIRED=1;PAIREDR=1;PAO=0;PQA=0;PQR=0;PRO=0;QA=744;QR=16623;RO=477;RPL=14;RPP=5.3706;RPPR=101.382;RPR=9;RUN=1;SAF=15;SAP=7.63648;SAR=8;SRF=176;SRP=74.1408;SRR=301;TYPE=snp;ANN=A
chr5B	681613321	ACGGC	GCGGT	ALT1	REF	intergenic_region	MODIFIER	TRIDC5BG077130-TRIDC5BG077140	AB=0.164557;ABP=80.2213;AC=11;AF=0.0474138;AN=232;AO=19;CIGAR=1X3M1X;DP=481;DPB=496.4;DPRA=2.92174;EPP=22.325;EPPR=4.9151;GTI=5;LEN=5;MEANALT=1.3;MQM=45.0526;MQMR=68.7829;NS=58;NUMALT=1;ODDS=1.31656;PAIRED=1;PAIREDR=1;PAO=0;PQA=0;PQR=829;PRO=30;QA=618;QR=15946;RO=456;RPL=13;RPP=8.61041;RPPR=110.155;RPR=6;RUN=1;SAF=10;SAP=3.12459;SAR=9;SRF=145;SRP=134.232;SRR=311;TYPE=complex;ANN=GCGGT
chr5B	681613363	G	A	ALT1	REF	intergenic_region	MODIFIER	TRIDC5BG077130-TRIDC5BG077140	AB=0.25;ABP=16.0391;AC=11;AF=0.0539216;AN=204;AO=17;CIGAR=1X;DP=298;DPB=298;DPRA=5.6744;EPP=3.13803;EPPR=6.4182;GTI=6;LEN=1;MEANALT=1;MQM=27.2353;MQMR=68.726;NS=51;NUMALT=1;ODDS=3.64919;PAIRED=1;PAIREDR=1;PAO=0;PQA=0;PQR=0;PRO=0;QA=436;QR=10016;RO=281;RPL=9;RPP=3.13803;RPPR=33.6814;RPR=8;RUN=1;SAF=2;SAP=24.5973;SAR=15;SRF=49;SRP=261.802;SRR=232;TYPE=snp;ANN=A
chr5B	681614763	C	T	ALT1	REF	intergenic_region	MODIFIER	TRIDC5BG077130-TRIDC5BG077140	AB=0.142857;ABP=181.381;AC=7;AF=0.0277778;AN=252;AO=26;CIGAR=1X;DP=793;DPB=793;DPRA=3.84579;EPP=6.01695;EPPR=26.4548;GTI=2;LEN=1;MEANALT=1;MQM=70;MQMR=68.2308;NS=63;NUMALT=1;ODDS=1.67225;PAIRED=1;PAIREDR=1;PAO=0;PQA=0;PQR=0;PRO=0;QA=963;QR=29110;RO=767;RPL=18;RPP=11.3621;RPPR=117.391;RPR=8;RUN=1;SAF=4;SAP=30.0702;SAR=22;SRF=209;SRP=347.844;SRR=558;TYPE=snp;ANN=T
chr5B	681616001	CTTTTTTTC	CTTTTTTTTT	REF	ALT1	intergenic_region	MODIFIER	TRIDC5BG077130-TRIDC5BG077140	AB=0;ABP=0;AC=44;AF=0.647059;AN=68;AO=4;CIGAR=1M1I7M1X;DP=20;DPB=23.4444;DPRA=1.16667;EPP=3.0103;EPPR=4.45795;GTI=5;LEN=10;MEANALT=1;MQM=64.5;MQMR=70;NS=17;NUMALT=1;ODDS=15.6153;PAIRED=1;PAIREDR=1;PAO=0.5;PQA=17;PQR=17;PRO=1.5;QA=148;QR=225;RO=6;RPL=1;RPP=5.18177;RPPR=8.80089;RPR=3;RUN=1;SAF=3;SAP=5.18177;SAR=1;SRF=3;SRP=3.0103;SRR=3;TYPE=complex;ANN=CTTTTTTTTT
chr5B	681644458	C	T	REF	ALT1	upstream_gene_variant	MODIFIER	TRIDC5BG077150	AB=0.666667;ABP=3.73412;AC=231;AF=0.931452;AN=248;AO=233;CIGAR=1X;DP=245;DPB=245;DPRA=1.46708;EPP=167.865;EPPR=21.1059;GTI=6;LEN=1;MEANALT=1;MQM=70;MQMR=70;NS=62;NUMALT=1;ODDS=0.295126;PAIRED=1;PAIREDR=1;PAO=0;PQA=0;PQR=0;PRO=0;QA=8681;QR=448;RO=12;RPL=31;RPP=275.525;RPPR=29.068;RPR=202;RUN=1;SAF=210;SAP=328.908;SAR=23;SRF=11;SRP=21.1059;SRR=1;TYPE=snp;ANN=T
chr5B	681644576	G	A	ALT1	REF	upstream_gene_variant	MODIFIER	TRIDC5BG077150	AB=0.206897;ABP=67.9298;AC=16;AF=0.0625;AN=256;AO=82;CIGAR=1X;DP=2282;DPB=2282;DPRA=0.684968;EPP=45.3805;EPPR=734.35;GTI=5;LEN=1;MEANALT=1;MQM=70;MQMR=70;NS=64;NUMALT=1;ODDS=0.234224;PAIRED=1;PAIREDR=1;PAO=0;PQA=0;PQR=0;PRO=0;QA=3031;QR=81283;RO=2196;RPL=48;RPP=8.20065;RPPR=42.5635;RPR=34;RUN=1;SAF=55;SAP=23.7717;SAR=27;SRF=1382;SRP=322.031;SRR=814;TYPE=snp;ANN=A
chr5B	681644792	T	G	REF	ALT1	upstream_gene_variant	MODIFIER	TRIDC5BG077150	AB=0.547945;ABP=5.92543;AC=237;AF=0.940476;AN=252;AO=1210;CIGAR=1X;DP=1312;DPB=1312;DPRA=1.82429;EPP=34.2795;EPPR=3.54779;GTI=4;LEN=1;MEANALT=1.01667;MQM=70;MQMR=70;NS=63;NUMALT=1;ODDS=0.444002;PAIRED=1;PAIREDR=1;PAO=0;PQA=0;PQR=0;PRO=0;QA=45582;QR=3630;RO=101;RPL=648;RPP=16.2832;RPPR=3.2038;RPR=562;RUN=1;SAF=669;SAP=32.4131;SAR=541;SRF=71;SRP=39.1513;SRR=30;TYPE=snp;ANN=G
chr5B	681645414	A	G	ALT1	REF	missense_variant	MODERATE	TRIDC5BG077140	AB=0.45;ABP=6.48466;AC=14;AF=0.0546875;AN=256;AO=122;CIGAR=1X;DP=2720;DPB=2720;DPRA=0.995675;EPP=4.14943;EPPR=12.2288;GTI=3;LEN=1;MEANALT=1;MQM=70;MQMR=70;NS=64;NUMALT=1;ODDS=1.30199;PAIRED=1;PAIREDR=1;PAO=0;PQA=0;PQR=0;PRO=0;QA=4500;QR=96068;RO=2597;RPL=66;RPP=4.7902;RPPR=353.029;RPR=56;RUN=1;SAF=55;SAP=5.57335;SAR=67;SRF=1168;SRP=59.9694;SRR=1429;TYPE=snp;ANN=G
chr5B	681645613	G	T	ALT1	REF	upstream_gene_variant	MODIFIER	TRIDC5BG077150	AB=0.444444;ABP=7.11197;AC=15;AF=0.0585938;AN=256;AO=110;CIGAR=1X;DP=1497;DPB=1497;DPRA=1.76728;EPP=3.0103;EPPR=37.7679;GTI=6;LEN=1;MEANALT=1;MQM=70;MQMR=70;NS=64;NUMALT=1;ODDS=0.385665;PAIRED=1;PAIREDR=1;PAO=0;PQA=0;PQR=0;PRO=0;QA=3982;QR=51284;RO=1387;RPL=61;RPP=5.85295;RPPR=72.7119;RPR=49;RUN=1;SAF=72;SAP=25.8305;SAR=38;SRF=788;SRP=58.9347;SRR=599;TYPE=snp;ANN=T
chr5B	681647497	C	T	ALT1	REF	upstream_gene_variant	MODIFIER	TRIDC5BG077150	AB=0.375;ABP=20.3821;AC=17;AF=0.0664062;AN=256;AO=83;CIGAR=1X;DP=1319;DPB=1319;DPRA=1.34515;EPP=3.03646;EPPR=12.9006;GTI=5;LEN=1;MEANALT=1;MQM=70;MQMR=70;NS=64;NUMALT=1;ODDS=0.258629;PAIRED=1;PAIREDR=1;PAO=0;PQA=0;PQR=0;PRO=0;QA=3030;QR=44800;RO=1235;RPL=54;RPP=19.3617;RPPR=55.6338;RPR=29;RUN=1;SAF=30;SAP=16.8502;SAR=53;SRF=494;SRP=110.281;SRR=741;TYPE=snp;ANN=T
chr5B	681647703	CC	CAC	REF	ALT1	upstream_gene_variant	MODIFIER	TRIDC5BG077150	AB=0.5;ABP=3.0103;AC=162;AF=0.9;AN=180;AO=80;CIGAR=1M1I1M;DP=90;DPB=143;DPRA=1.65854;EPP=24.2907;EPPR=3.0103;GTI=6;LEN=1;MEANALT=1.07317;MQM=70;MQMR=70;NS=45;NUMALT=1;ODDS=6.04097;PAIRED=1;PAIREDR=1;PAO=5;PQA=147;PQR=147;PRO=5;QA=2267;QR=72;RO=2;RPL=59;RPP=42.2054;RPPR=7.35324;RPR=21;RUN=1;SAF=11;SAP=94.3207;SAR=69;SRF=1;SRP=3.0103;SRR=1;TYPE=ins;ANN=CAC
chr5B	681649212	ATTTTTTTTTTG	ATTTTTTTTTTTTG,ATTTTTTTTTTTG	REF	ALT1	downstream_gene_variant	MODIFIER	TRIDC5BG077140	AB=0.555556,0.368421;ABP=6.8707,28.7251;AC=168,58;AF=0.666667,0.230159;AN=252;AO=227,101;CIGAR=1M2I11M,1M1I11M;DP=380;DPB=517.083;DPRA=1.10491,1.85778;EPP=40.9776,3.0318;EPPR=5.73856;GTI=28;LEN=2,1;MEANALT=1.52083,1.8;MQM=70,70;MQMR=70;NS=63;NUMALT=2;ODDS=0.260787;PAIRED=1,1;PAIREDR=1;PAO=56.3333,37.3333;PQA=1913,1268;PQR=1268;PRO=37.3333;QA=6905,3283;QR=1407;RO=39;RPL=155,61;RPP=68.9102,12.4917;…
chr5B	681650664	A	G	REF	ALT1	downstream_gene_variant	MODIFIER	TRIDC5BG077140	AB=0.615385;ABP=4.51363;AC=177;AF=0.885;AN=200;AO=164;CIGAR=1X;DP=186;DPB=186;DPRA=1.10458;EPP=6.39992;EPPR=4.58955;GTI=7;LEN=1;MEANALT=1;MQM=63.3476;MQMR=57.3182;NS=50;NUMALT=1;ODDS=0.570584;PAIRED=1;PAIREDR=1;PAO=0;PQA=0;PQR=0;PRO=0;QA=6280;QR=836;RO=22;RPL=100;RPP=20.1702;RPPR=22.3561;RPR=64;RUN=1;SAF=64;SAP=20.1702;SAR=100;SRF=9;SRP=4.58955;SRR=13;TYPE=snp;ANN=G
chr5B	681653745	C	T	REF	ALT1	intron_variant	MODIFIER	TRIDC5BG077150	AB=0.234043;ABP=31.8863;AC=22;AF=0.117021;AN=188;AO=14;CIGAR=1X;DP=147;DPB=147;DPRA=1.50344;EPP=12.937;EPPR=3.60252;GTI=14;LEN=1;MEANALT=1.08333;MQM=32.2143;MQMR=34.2576;NS=47;NUMALT=1;ODDS=4.5438;PAIRED=1;PAIREDR=1;PAO=0;PQA=0;PQR=0;PRO=0;QA=541;QR=4937;RO=132;RPL=3;RPP=12.937;RPPR=34.8586;RPR=11;RUN=1;SAF=14;SAP=33.4109;SAR=0;SRF=103;SRP=93.0935;SRR=29;TYPE=snp;ANN=T
chr5B	681659391	CA	CG,TG	ALT2	ALT1	upstream_gene_variant	MODIFIER	TRIDC5BG077160	AB=0.5,0.375;ABP=3.0103,4.09604;AC=197,11;AF=0.947115,0.0528846;AN=208;AO=107,7;CIGAR=1M1X,2X;DP=115;DPB=115;DPRA=1.11,1.39806;EPP=149.635,18.2106;EPPR=0;GTI=4;LEN=1,2;MEANALT=1.06,1.75;MQM=69.8505,67.7143;MQMR=0;NS=52;NUMALT=2;ODDS=1.05509;PAIRED=1,1;PAIREDR=0;PAO=0,0;PQA=0,0;PQR=0;PRO=0;QA=4113,266;QR=0;RO=0;RPL=9,0;RPP=163.76,18.2106;RPPR=0;RPR=98,7;RUN=1,1;SAF=105,7;SAP=218.311,18.2106;SAR=2,…
chr5B	681659401	C	T	ALT1	REF	upstream_gene_variant	MODIFIER	TRIDC5BG077160	AB=0.473684;ABP=3.12459;AC=17;AF=0.0732759;AN=232;AO=16;CIGAR=1X;DP=154;DPB=154;DPRA=1.76042;EPP=29.6108;EPPR=130.466;GTI=6;LEN=1;MEANALT=1;MQM=65.875;MQMR=69.8841;NS=58;NUMALT=1;ODDS=1.12096;PAIRED=1;PAIREDR=1;PAO=0;PQA=0;PQR=0;PRO=0;QA=608;QR=5315;RO=138;RPL=1;RPP=29.6108;RPPR=154.132;RPR=15;RUN=1;SAF=16;SAP=37.7539;SAR=0;SRF=134;SRP=268.937;SRR=4;TYPE=snp;ANN=T
chr5B	681659916	T	C	REF	ALT1	upstream_gene_variant	MODIFIER	TRIDC5BG077160	AB=0.531646;ABP=3.69747;AC=236;AF=0.936508;AN=252;AO=502;CIGAR=1X;DP=550;DPB=550;DPRA=2.45;EPP=6.4016;EPPR=3.19126;GTI=4;LEN=1;MEANALT=1;MQM=39.9761;MQMR=39.75;NS=63;NUMALT=1;ODDS=0.581712;PAIRED=1;PAIREDR=1;PAO=0;PQA=0;PQR=0;PRO=0;QA=19002;QR=1777;RO=48;RPL=251;RPP=3.0103;RPPR=5.9056;RPR=251;RUN=1;SAF=454;SAP=716.032;SAR=48;SRF=43;SRP=68.3354;SRR=5;TYPE=snp;ANN=C
chr5B	681660216	C	A	ALT1	REF	upstream_gene_variant	MODIFIER	TRIDC5BG077160	AB=0.609375;ABP=9.66043;AC=16;AF=0.0645161;AN=248;AO=46;CIGAR=1X;DP=474;DPB=474;DPRA=2.00844;EPP=21.8927;EPPR=638.805;GTI=4;LEN=1;MEANALT=1;MQM=68.1304;MQMR=68.5537;NS=62;NUMALT=1;ODDS=0.603996;PAIRED=1;PAIREDR=1;PAO=0;PQA=0;PQR=0;PRO=0;QA=1690;QR=15818;RO=428;RPL=24;RPP=3.19912;RPPR=123.334;RPR=22;RUN=1;SAF=23;SAP=3.0103;SAR=23;SRF=298;SRP=146.206;SRR=130;TYPE=snp;ANN=A
chr5B	681660347	G	A	REF	ALT1	synonymous_variant	LOW	TRIDC5BG077150	AB=0.466165;ABP=4.33278;AC=241;AF=0.941406;AN=256;AO=853;CIGAR=1X;DP=942;DPB=942;DPRA=1.65591;EPP=24.0911;EPPR=19.6912;GTI=5;LEN=1;MEANALT=1.01613;MQM=70;MQMR=70;NS=64;NUMALT=1;ODDS=0.555713;PAIRED=1;PAIREDR=1;PAO=0;PQA=0;PQR=0;PRO=0;QA=30846;QR=3151;RO=88;RPL=514;RPP=80.972;RPPR=3.109;RPR=339;RUN=1;SAF=389;SAP=17.3298;SAR=464;SRF=28;SRP=28.2783;SRR=60;TYPE=snp;ANN=A
chr5B	681660848	T	C	REF	ALT1	splice_region_variant&intron_variant	LOW	TRIDC5BG077150	AB=0.443038;ABP=5.23675;AC=223;AF=0.913934;AN=244;AO=323;CIGAR=1X;DP=376;DPB=376;DPRA=3.22807;EPP=177.273;EPPR=31.2394;GTI=6;LEN=1;MEANALT=1.01754;MQM=70;MQMR=70;NS=61;NUMALT=1;ODDS=0.916477;PAIRED=1;PAIREDR=1;PAO=0;PQA=0;PQR=0;PRO=0;QA=12354;QR=1967;RO=52;RPL=224;RPP=108.054;RPPR=27.0635;RPR=99;RUN=1;SAF=52;SAP=325.444;SAR=271;SRF=7;SRP=63.3104;SRR=45;TYPE=snp;ANN=C
chr5B	681660852	CGTGTGTGTGTGTG	CGTGTGTGTGTGTGTG	ALT1	REF	frameshift_variant	HIGH	TRIDC5BG077150	AB=0.441176;ABP=5.05404;AC=16;AF=0.0655738;AN=244;AO=34;CIGAR=1M2I13M;DP=325;DPB=368.071;DPRA=3.18735;EPP=19.3602;EPPR=171.194;GTI=4;LEN=2;MEANALT=1.6;MQM=70;MQMR=70;NS=61;NUMALT=1;ODDS=0.349642;PAIRED=1;PAIREDR=1;PAO=42.5;PQA=1394.5;PQR=1394.5;PRO=42.5;QA=1253;QR=10535;RO=279;RPL=25;RPP=19.3602;RPPR=132.528;RPR=9;RUN=1;SAF=6;SAP=33.9218;SAR=28;SRF=57;SRP=214.904;SRR=222;TYPE=ins;ANN=CGTGTGTGTGTG…
chr5B	681664733	GAC	AAC	REF	ALT1	upstream_gene_variant	MODIFIER	TRIDC5BG077160	AB=0.668831;ABP=79.2656;AC=216;AF=0.84375;AN=256;AO=700;CIGAR=1X2M;DP=841;DPB=847.667;DPRA=1.83085;EPP=67.3355;EPPR=23.4033;GTI=15;LEN=1;MEANALT=1.03279;MQM=70;MQMR=46.2971;NS=64;NUMALT=1;ODDS=0.419275;PAIRED=1;PAIREDR=1;PAO=5.5;PQA=127.5;PQR=149.5;PRO=6.5;QA=25085;QR=4803;RO=138;RPL=280;RPP=63.8115;RPPR=103.716;RPR=420;RUN=1;SAF=512;SAP=328.657;SAR=188;SRF=78;SRP=8.10854;SRR=60;TYPE=snp;ANN=AAC
chr5B	681664874	C	A	ALT1	REF	upstream_gene_variant	MODIFIER	TRIDC5BG077160	AB=0.4;ABP=6.48466;AC=12;AF=0.0491803;AN=244;AO=20;CIGAR=1X;DP=293;DPB=293;DPRA=2.51807;EPP=4.74748;EPPR=97.5131;GTI=3;LEN=1;MEANALT=1;MQM=70;MQMR=70;NS=61;NUMALT=1;ODDS=2.54374;PAIRED=1;PAIREDR=1;PAO=0;PQA=0;PQR=0;PRO=0;QA=764;QR=10442;RO=273;RPL=12;RPP=4.74748;RPPR=104.576;RPR=8;RUN=1;SAF=0;SAP=46.4397;SAR=20;SRF=6;SRP=544.852;SRR=267;TYPE=snp;ANN=A
chr5B	681667037	ATTTTTTG	ATTTTTTTG	REF	ALT1	downstream_gene_variant	MODIFIER	TRIDC5BG077160	AB=0.472973;ABP=3.47981;AC=216;AF=0.915254;AN=236;AO=341;CIGAR=1M1I7M;DP=395;DPB=472.625;DPRA=2.32121;EPP=58.0867;EPPR=3.18402;GTI=7;LEN=1;MEANALT=1.05455;MQM=70;MQMR=70;NS=59;NUMALT=1;ODDS=0.186323;PAIRED=1;PAIREDR=1;PAO=30;PQA=888.5;PQR=888.5;PRO=30;QA=12429;QR=1835;RO=50;RPL=145;RPP=19.5733;RPPR=4.57376;RPR=196;RUN=1;SAF=258;SAP=198.029;SAR=83;SRF=38;SRP=32.3686;SRR=12;TYPE=ins;ANN=ATTTTTTTG
chr5B	681667050	C	T	ALT1	REF	downstream_gene_variant	MODIFIER	TRIDC5BG077160	AB=0.47561;ABP=3.434;AC=16;AF=0.0655738;AN=244;AO=49;CIGAR=1X;DP=470;DPB=470;DPRA=2.72593;EPP=6.59988;EPPR=26.9172;GTI=4;LEN=1;MEANALT=1;MQM=70;MQMR=70;NS=61;NUMALT=1;ODDS=0.124069;PAIRED=1;PAIREDR=1;PAO=0;PQA=0;PQR=0;PRO=0;QA=1819;QR=15591;RO=420;RPL=27;RPP=4.11819;RPPR=26.9172;RPR=22;RUN=1;SAF=37;SAP=30.7077;SAR=12;SRF=304;SRP=185.745;SRR=116;TYPE=snp;ANN=T
chr5B	681667229	A	C	ALT1	REF	downstream_gene_variant	MODIFIER	TRIDC5BG077160	AB=0.535088;ABP=4.22937;AC=17;AF=0.0745614;AN=228;AO=65;CIGAR=1X;DP=466;DPB=466;DPRA=3.52644;EPP=8.65613;EPPR=11.2467;GTI=5;LEN=1;MEANALT=1;MQM=49.6615;MQMR=54.1122;NS=57;NUMALT=1;ODDS=2.31905;PAIRED=1;PAIREDR=1;PAO=0;PQA=0;PQR=0;PRO=0;QA=2245;QR=13409;RO=401;RPL=47;RPP=31.1058;RPPR=146.885;RPR=18;RUN=1;SAF=10;SAP=70.66;SAR=55;SRF=78;SRP=328.054;SRR=323;TYPE=snp;ANN=C
chr5B	681667716	G	A	ALT1	REF	downstream_gene_variant	MODIFIER	TRIDC5BG077160	AB=0.355263;ABP=16.8392;AC=15;AF=0.0614754;AN=244;AO=39;CIGAR=1X;DP=450;DPB=450;DPRA=2.72265;EPP=32.4644;EPPR=608.078;GTI=4;LEN=1;MEANALT=1;MQM=35.8205;MQMR=37.9244;NS=61;NUMALT=1;ODDS=0.274984;PAIRED=1;PAIREDR=1;PAO=0;PQA=0;PQR=0;PRO=0;QA=1485;QR=15650;RO=410;RPL=0;RPP=87.6977;RPPR=884.649;RPR=39;RUN=1;SAF=31;SAP=32.4644;SAR=8;SRF=375;SRP=615.26;SRR=35;TYPE=snp;ANN=A
chr5B	681673778	CGAC	CGAT	REF	ALT1	intergenic_region	MODIFIER	TRIDC5BG077160-TRIDC5BG077210	AB=0.555556;ABP=3.9754;AC=160;AF=0.909091;AN=176;AO=186;CIGAR=3M1X;DP=212;DPB=215;DPRA=1.86585;EPP=4.17776;EPPR=20.744;GTI=6;LEN=1;MEANALT=1.02439;MQM=40.6398;MQMR=49.1667;NS=44;NUMALT=1;ODDS=2.09915;PAIRED=1;PAIREDR=1;PAO=2;PQA=66;PQR=109;PRO=4;QA=6788;QR=788;RO=24;RPL=108;RPP=13.5174;RPPR=3.37221;RPR=78;RUN=1;SAF=48;SAP=97.5744;SAR=138;SRF=10;SRP=4.45795;SRR=14;TYPE=snp;ANN=CGAT
chr5B	681673918	C	A	ALT1	REF	intergenic_region	MODIFIER	TRIDC5BG077160-TRIDC5BG077210	AB=0.375;ABP=6.26751;AC=12;AF=0.0588235;AN=204;AO=11;CIGAR=1X;DP=203;DPB=203;DPRA=1.72599;EPP=19.0002;EPPR=160.487;GTI=3;LEN=1;MEANALT=1;MQM=56.9091;MQMR=53.5104;NS=51;NUMALT=1;ODDS=0.293584;PAIRED=1;PAIREDR=1;PAO=0;PQA=0;PQR=0;PRO=0;QA=438;QR=7315;RO=192;RPL=0;RPP=26.8965;RPPR=394.282;RPR=11;RUN=1;SAF=10;SAP=19.0002;SAR=1;SRF=152;SRP=144.88;SRR=40;TYPE=snp;ANN=A
chr5B	681673934	AATATATC	AAATATC	REF	ALT1	intergenic_region	MODIFIER	TRIDC5BG077160-TRIDC5BG077210	AB=0.514286;ABP=3.07234;AC=196;AF=0.907407;AN=216;AO=220;CIGAR=2M1D5M;DP=249;DPB=225.5;DPRA=3.904;EPP=8.69561;EPPR=8.07707;GTI=6;LEN=1;MEANALT=1.12;MQM=51.3909;MQMR=44.8571;NS=54;NUMALT=1;ODDS=0.281233;PAIRED=1;PAIREDR=1;PAO=4.33333;PQA=53.3333;PQR=88.3333;PRO=5.33333;QA=7326;QR=785;RO=21;RPL=94;RPP=13.1175;RPPR=15.5221;RPR=126;RUN=1;SAF=178;SAP=185.572;SAR=42;SRF=19;SRP=32.8939;SRR=2;TYPE=del;AN…
chr5B	681674003	CA	TG,CG	ALT2	ALT1	intergenic_region	MODIFIER	TRIDC5BG077160-TRIDC5BG077210	AB=0.458333,0.541667;ABP=3.73412,3.73412;AC=212,16;AF=0.929825,0.0701754;AN=228;AO=240,32;CIGAR=2X,1M1X;DP=275;DPB=275.5;DPRA=3,2.17352;EPP=12.2752,9.79615;EPPR=0;GTI=8;LEN=2,1;MEANALT=1.11111,1.5;MQM=40.875,37;MQMR=0;NS=57;NUMALT=2;ODDS=0.472692;PAIRED=1,1;PAIREDR=0;PAO=0,0.5;PQA=0,16;PQR=16;PRO=0.5;QA=8639,1127;QR=0;RO=0;RPL=126,22;RPP=4.31318,12.7819;RPPR=0;RPR=114,10;RUN=1,1;SAF=180,27;SAP=13…
chr5B	681674033	C	T	REF	ALT1	intergenic_region	MODIFIER	TRIDC5BG077160-TRIDC5BG077210	AB=0.571429;ABP=10.1451;AC=203;AF=0.875;AN=232;AO=357;CIGAR=1X;DP=434;DPB=434;DPRA=2.17857;EPP=13.2351;EPPR=3.26411;GTI=10;LEN=1;MEANALT=1;MQM=45.6555;MQMR=40.8442;NS=58;NUMALT=1;ODDS=0.0788039;PAIRED=1;PAIREDR=1;PAO=0;PQA=0;PQR=0;PRO=0;QA=12894;QR=2723;RO=77;RPL=143;RPP=33.6725;RPPR=30.1114;RPR=214;RUN=1;SAF=233;SAP=75.2771;SAR=124;SRF=55;SRP=33.7211;SRR=22;TYPE=snp;ANN=T
chr5B	681674291	G	A	ALT1	REF	intergenic_region	MODIFIER	TRIDC5BG077160-TRIDC5BG077210	AB=0.368;ABP=21.9282;AC=16;AF=0.0625;AN=256;AO=57;CIGAR=1X;DP=795;DPB=795;DPRA=2.4352;EPP=7.61992;EPPR=92.3357;GTI=4;LEN=1;MEANALT=1;MQM=56;MQMR=58.587;NS=64;NUMALT=1;ODDS=0.11275;PAIRED=1;PAIREDR=1;PAO=0;PQA=0;PQR=0;PRO=0;QA=1994;QR=25823;RO=736;RPL=39;RPP=19.8106;RPPR=231.027;RPR=18;RUN=1;SAF=20;SAP=14.02;SAR=37;SRF=256;SRP=151.048;SRR=480;TYPE=snp;ANN=A
chr5B	681674867	T	C	REF	ALT1	intergenic_region	MODIFIER	TRIDC5BG077160-TRIDC5BG077210	AB=0.541667;ABP=3.73412;AC=231;AF=0.931452;AN=248;AO=311;CIGAR=1X;DP=344;DPB=344;DPRA=1.69831;EPP=14.7474;EPPR=3.0761;GTI=4;LEN=1;MEANALT=1;MQM=50.9453;MQMR=52.6667;NS=62;NUMALT=1;ODDS=1.87656;PAIRED=1;PAIREDR=1;PAO=0;PQA=0;PQR=0;PRO=0;QA=11948;QR=1266;RO=33;RPL=154;RPP=3.07314;RPPR=6.23461;RPR=157;RUN=1;SAF=200;SAP=58.3165;SAR=111;SRF=22;SRP=10.9724;SRR=11;TYPE=snp;ANN=C
chr5B	681688753	CG	TA	ALT1	REF	intergenic_region	MODIFIER	TRIDC5BG077160-TRIDC5BG077210	AB=0.214286;ABP=12.937;AC=17;AF=0.0720339;AN=236;AO=14;CIGAR=2X;DP=231;DPB=232.5;DPRA=1.31068;EPP=3.0103;EPPR=4.01561;GTI=4;LEN=2;MEANALT=1;MQM=70;MQMR=69.9398;NS=59;NUMALT=1;ODDS=2.87786;PAIRED=1;PAIREDR=1;PAO=0;PQA=0;PQR=0;PRO=3;QA=527;QR=8075;RO=216;RPL=7;RPP=3.0103;RPPR=44.1879;RPR=7;RUN=1;SAF=12;SAP=18.5208;SAR=2;SRF=179;SRP=205.721;SRR=37;TYPE=mnp;ANN=TA
chr5B	681688777	TAAAAAAAC	TAAAAAAC	ALT1	REF	intergenic_region	MODIFIER	TRIDC5BG077160-TRIDC5BG077210	AB=0.1875;ABP=16.582;AC=17;AF=0.0685484;AN=248;AO=21;CIGAR=1M1D7M;DP=304;DPB=332.444;DPRA=1.43556;EPP=3.1137;EPPR=27.1583;GTI=4;LEN=1;MEANALT=1;MQM=68;MQMR=70;NS=62;NUMALT=1;ODDS=3.01504;PAIRED=1;PAIREDR=1;PAO=15.5;PQA=487;PQR=1030;PRO=31.5;QA=768;QR=10398;RO=282;RPL=9;RPP=3.94093;RPPR=45.1769;RPR=12;RUN=1;SAF=17;SAP=20.4855;SAR=4;SRF=207;SRP=137.18;SRR=75;TYPE=del;ANN=TAAAAAAC
chr5B	681688833	A	G	ALT1	REF	intergenic_region	MODIFIER	TRIDC5BG077160-TRIDC5BG077210	AB=0.540541;ABP=3.5385;AC=16;AF=0.0625;AN=256;AO=32;CIGAR=1X;DP=401;DPB=401;DPRA=1.64261;EPP=4.09604;EPPR=36.112;GTI=4;LEN=1;MEANALT=1;MQM=50.375;MQMR=61.7127;NS=64;NUMALT=1;ODDS=0.0936646;PAIRED=1;PAIREDR=1;PAO=0;PQA=0;PQR=0;PRO=0;QA=1188;QR=13545;RO=369;RPL=15;RPP=3.28173;RPPR=11.961;RPR=17;RUN=1;SAF=23;SAP=16.3106;SAR=9;SRF=199;SRP=7.95937;SRR=170;TYPE=snp;ANN=G
chr5B	681689066	C	G	ALT1	REF	intergenic_region	MODIFIER	TRIDC5BG077160-TRIDC5BG077210	AB=0.447368;ABP=3.9246;AC=16;AF=0.0677966;AN=236;AO=21;CIGAR=1X;DP=255;DPB=255;DPRA=2.12958;EPP=5.59539;EPPR=68.4885;GTI=5;LEN=1;MEANALT=1;MQM=28.3333;MQMR=31.9444;NS=59;NUMALT=1;ODDS=0.778698;PAIRED=1;PAIREDR=1;PAO=0;PQA=0;PQR=0;PRO=0;QA=791;QR=8633;RO=234;RPL=14;RPP=8.07707;RPPR=103.381;RPR=7;RUN=1;SAF=15;SAP=11.386;SAR=6;SRF=138;SRP=19.3799;SRR=96;TYPE=snp;ANN=G
chr5B	681689168	T	C	REF	ALT1	intergenic_region	MODIFIER	TRIDC5BG077160-TRIDC5BG077210	AB=0.555556;ABP=4.69922;AC=213;AF=0.934211;AN=228;AO=283;CIGAR=1X;DP=323;DPB=323;DPRA=1.57576;EPP=33.4646;EPPR=9.74743;GTI=3;LEN=1;MEANALT=1.01852;MQM=46.8905;MQMR=46.0513;NS=57;NUMALT=1;ODDS=0.333037;PAIRED=1;PAIREDR=1;PAO=0;PQA=0;PQR=0;PRO=0;QA=10640;QR=1434;RO=39;RPL=116;RPP=22.9679;RPPR=3.51141;RPR=167;RUN=1;SAF=102;SAP=50.8978;SAR=181;SRF=12;SRP=15.538;SRR=27;TYPE=snp;ANN=C
chr5B	681689174	CGG	TGA,CGA	ALT2	ALT1	intergenic_region	MODIFIER	TRIDC5BG077160-TRIDC5BG077210	AB=0.508197,0.491803;ABP=3.0459,3.0459;AC=208,16;AF=0.928571,0.0714286;AN=224;AO=263,39;CIGAR=1X1M1X,2M1X;DP=303;DPB=303;DPRA=1.65849,3.12155;EPP=9.02932,9.74743;EPPR=0;GTI=5;LEN=3,1;MEANALT=1.03774,1.6;MQM=48.6958,48.2308;MQMR=0;NS=56;NUMALT=2;ODDS=0.0489779;PAIRED=1,1;PAIREDR=0;PAO=0,0;PQA=0,0;PQR=0;PRO=0;QA=9855,1466;QR=0;RO=0;RPL=121,19;RPP=6.65144,3.06598;RPPR=0;RPR=142,20;RUN=1,1;SAF=87,11;…
chr5B	681692334	CGCAAAAAAAAT	TGCAAAAAAAT	REF	ALT1	intergenic_region	MODIFIER	TRIDC5BG077160-TRIDC5BG077210	AB=0.333333;ABP=5.9056;AC=175;AF=0.911458;AN=192;AO=104;CIGAR=1X2M1D8M;DP=130;DPB=133.833;DPRA=0.893939;EPP=8.35546;EPPR=5.18177;GTI=11;LEN=11;MEANALT=1.04545;MQM=70;MQMR=70;NS=48;NUMALT=1;ODDS=1.679;PAIRED=1;PAIREDR=1;PAO=13.8333;PQA=461.5;PQR=305;PRO=9.33333;QA=3850;QR=581;RO=16;RPL=36;RPP=24.391;RPPR=7.89611;RPR=68;RUN=1;SAF=80;SAP=68.4885;SAR=24;SRF=7;SRP=3.55317;SRR=9;TYPE=complex;ANN=TGCAAA…
chr5B	681711312	G	A	REF	ALT1	intergenic_region	MODIFIER	TRIDC5BG077160-TRIDC5BG077210	AB=0.414141;ABP=9.34924;AC=73;AF=0.445122;AN=164;AO=55;CIGAR=1X;DP=131;DPB=131;DPRA=2.5977;EPP=3.36563;EPPR=4.03889;GTI=24;LEN=1;MEANALT=1;MQM=70;MQMR=70;NS=41;NUMALT=1;ODDS=0.193381;PAIRED=1;PAIREDR=1;PAO=0;PQA=0;PQR=0;PRO=0;QA=1963;QR=2764;RO=76;RPL=41;RPP=31.7922;RPPR=4.03889;RPR=14;RUN=1;SAF=22;SAP=7.78754;SAR=33;SRF=36;SRP=3.46745;SRR=40;TYPE=snp;ANN=A
chr5B	681711321	C	T	REF	ALT1	intergenic_region	MODIFIER	TRIDC5BG077160-TRIDC5BG077210	AB=0.42268;ABP=8.04722;AC=89;AF=0.505682;AN=176;AO=57;CIGAR=1X;DP=127;DPB=127;DPRA=2.69048;EPP=3.0484;EPPR=3.50664;GTI=29;LEN=1;MEANALT=1;MQM=70;MQMR=70;NS=44;NUMALT=1;ODDS=0.114933;PAIRED=1;PAIREDR=1;PAO=0;PQA=0;PQR=0;PRO=0;QA=2081;QR=2602;RO=70;RPL=41;RPP=26.8203;RPPR=15.4187;RPR=16;RUN=1;SAF=20;SAP=14.02;SAR=37;SRF=30;SRP=6.1124;SRR=40;TYPE=snp;ANN=T
chr5B	681711332	ACC	AC	REF	ALT1	intergenic_region	MODIFIER	TRIDC5BG077160-TRIDC5BG077210	AB=0.520833;ABP=3.37221;AC=102;AF=0.579545;AN=176;AO=74;CIGAR=1M1D1M;DP=134;DPB=112;DPRA=2.20408;EPP=4.88833;EPPR=4.31318;GTI=24;LEN=1;MEANALT=1;MQM=70;MQMR=70;NS=44;NUMALT=1;ODDS=0.0152941;PAIRED=1;PAIREDR=1;PAO=1;PQA=33.5;PQR=97.5;PRO=3;QA=2405;QR=2064;RO=60;RPL=47;RPP=14.748;RPPR=14.7363;RPR=27;RUN=1;SAF=28;SAP=12.5178;SAR=46;SRF=22;SRP=12.2752;SRR=38;TYPE=del;ANN=AC
chr5B	681711354	CTGT	CTGC	REF	ALT1	intergenic_region	MODIFIER	TRIDC5BG077160-TRIDC5BG077210	AB=0.412698;ABP=7.18091;AC=60;AF=0.428571;AN=140;AO=36;CIGAR=3M1X;DP=97;DPB=102.5;DPRA=1.79735;EPP=3.0103;EPPR=16.956;GTI=37;LEN=1;MEANALT=1.22727;MQM=70;MQMR=70;NS=35;NUMALT=1;ODDS=0.2294;PAIRED=1;PAIREDR=1;PAO=4;PQA=137.5;PQR=137.5;PRO=4;QA=1304;QR=1621;RO=45;RPL=13;RPP=9.04217;RPPR=4.21667;RPR=23;RUN=1;SAF=13;SAP=9.04217;SAR=23;SRF=13;SRP=20.4303;SRR=32;TYPE=snp;ANN=CTGC
chr5B	681711358	CCTG	CCTA	REF	ALT1	intergenic_region	MODIFIER	TRIDC5BG077160-TRIDC5BG077210	AB=0.409836;ABP=7.31765;AC=60;AF=0.416667;AN=144;AO=36;CIGAR=3M1X;DP=98;DPB=98.5;DPRA=1.76224;EPP=3.25157;EPPR=11.9764;GTI=20;LEN=1;MEANALT=1;MQM=70;MQMR=70;NS=36;NUMALT=1;ODDS=0.0378549;PAIRED=1;PAIREDR=1;PAO=0.5;PQA=15;PQR=15;PRO=0.5;QA=1304;QR=2267;RO=62;RPL=14;RPP=6.8707;RPPR=5.25182;RPR=22;RUN=1;SAF=13;SAP=9.04217;SAR=23;SRF=18;SRP=26.6864;SRR=44;TYPE=snp;ANN=CCTA
chr5B	681713711	G	A	ALT1	REF	intergenic_region	MODIFIER	TRIDC5BG077160-TRIDC5BG077210	AB=0.196319;ABP=133.578;AC=18;AF=0.0725806;AN=248;AO=34;CIGAR=1X;DP=509;DPB=509;DPRA=2.49419;EPP=12.2071;EPPR=152.778;GTI=6;LEN=1;MEANALT=1;MQM=70;MQMR=69.8989;NS=62;NUMALT=1;ODDS=0.840846;PAIRED=1;PAIREDR=1;PAO=0;PQA=0;PQR=0;PRO=0;QA=1308;QR=17449;RO=475;RPL=12;RPP=9.39698;RPPR=7.98869;RPR=22;RUN=1;SAF=25;SAP=19.3602;SAR=9;SRF=269;SRP=21.1547;SRR=206;TYPE=snp;ANN=A
chr5B	681714384	T	C	REF	ALT1	intergenic_region	MODIFIER	TRIDC5BG077160-TRIDC5BG077210	AB=0.483936;ABP=4.12656;AC=122;AF=0.5;AN=244;AO=261;CIGAR=1X;DP=542;DPB=542;DPRA=3.25786;EPP=3.08518;EPPR=3.78583;GTI=6;LEN=1;MEANALT=1;MQM=61.3142;MQMR=62.3071;NS=61;NUMALT=1;ODDS=0.189526;PAIRED=1;PAIREDR=1;PAO=0;PQA=0;PQR=0;PRO=0;QA=9130;QR=9853;RO=280;RPL=136;RPP=4.017;RPPR=11.9754;RPR=125;RUN=1;SAF=93;SAP=49.8093;SAR=168;SRF=68;SRP=163.823;SRR=212;TYPE=snp;ANN=C
chr5B	681717505	ACGC	ACAC	REF	ALT1	intergenic_region	MODIFIER	TRIDC5BG077160-TRIDC5BG077210	AB=0;ABP=0;AC=64;AF=0.941176;AN=68;AO=18;CIGAR=2M1X1M;DP=22;DPB=22;DPRA=1.3125;EPP=4.9405;EPPR=0;GTI=3;LEN=1;MEANALT=1.125;MQM=69.7778;MQMR=0;NS=17;NUMALT=1;ODDS=5.17197;PAIRED=1;PAIREDR=0;PAO=1;PQA=34.6667;PQR=34.6667;PRO=1;QA=622;QR=0;RO=0;RPL=12;RPP=7.35324;RPPR=0;RPR=6;RUN=1;SAF=7;SAP=4.9405;SAR=11;SRF=0;SRP=0;SRR=0;TYPE=snp;ANN=ACAC
chr5B	681742403	CTA	TTG,CTG	ALT2	ALT1	intergenic_region	MODIFIER	TRIDC5BG077160-TRIDC5BG077210	AB=0.431034,0.568966;ABP=5.40641,5.40641;AC=224,16;AF=0.933333,0.0666667;AN=240;AO=288,41;CIGAR=1X1M1X,2M1X;DP=330;DPB=330;DPRA=2.11842,2.75;EPP=66.8275,18.3165;EPPR=0;GTI=6;LEN=3,1;MEANALT=1.05263,1.4;MQM=69.9132,70;MQMR=0;NS=60;NUMALT=2;ODDS=0.808443;PAIRED=1,1;PAIREDR=0;PAO=0,0;PQA=0,0;PQR=0;PRO=0;QA=10951,1574;QR=0;RO=0;RPL=96,12;RPP=72.4974,18.3165;RPPR=0;RPR=192,29;RUN=1,1;SAF=286,41;SAP=61…
chr5B	681742416	C	T	REF	ALT1	intergenic_region	MODIFIER	TRIDC5BG077160-TRIDC5BG077210	AB=0.472222;ABP=3.49285;AC=232;AF=0.935484;AN=248;AO=354;CIGAR=1X;DP=402;DPB=402;DPRA=1.99322;EPP=64.3513;EPPR=14.5915;GTI=5;LEN=1;MEANALT=1;MQM=69.9294;MQMR=70;NS=62;NUMALT=1;ODDS=0.0107242;PAIRED=1;PAIREDR=1;PAO=0;PQA=0;PQR=0;PRO=0;QA=13530;QR=1824;RO=48;RPL=121;RPP=79.9565;RPPR=21.1059;RPR=233;RUN=1;SAF=346;SAP=703.795;SAR=8;SRF=46;SRP=90.593;SRR=2;TYPE=snp;ANN=T
chr5B	681742642	GCA	GA	ALT1	REF	intergenic_region	MODIFIER	TRIDC5BG077160-TRIDC5BG077210	AB=0.395683;ABP=16.1485;AC=15;AF=0.0585938;AN=256;AO=70;CIGAR=1M1D1M;DP=850;DPB=846;DPRA=2.61092;EPP=47.8047;EPPR=231.311;GTI=6;LEN=1;MEANALT=1;MQM=54.6571;MQMR=53.0283;NS=64;NUMALT=1;ODDS=0.400922;PAIRED=1;PAIREDR=1;PAO=9;PQA=267.5;PQR=929.5;PRO=29;QA=2593;QR=28917;RO=778;RPL=51;RPP=34.7758;RPPR=97.5056;RPR=19;RUN=1;SAF=11;SAP=74.4828;SAR=59;SRF=175;SRP=514.294;SRR=603;TYPE=del;ANN=GA
chr5B	681742654	A	G	ALT1	REF	intergenic_region	MODIFIER	TRIDC5BG077160-TRIDC5BG077210	AB=0.352;ABP=26.7923;AC=14;AF=0.0546875;AN=256;AO=58;CIGAR=1X;DP=787;DPB=787;DPRA=2.53117;EPP=36.7056;EPPR=291.906;GTI=4;LEN=1;MEANALT=1;MQM=51.5172;MQMR=52.0454;NS=64;NUMALT=1;ODDS=0.0774731;PAIRED=1;PAIREDR=1;PAO=0;PQA=0;PQR=0;PRO=0;QA=2127;QR=26788;RO=727;RPL=42;RPP=28.3192;RPPR=71.1145;RPR=16;RUN=1;SAF=10;SAP=57.0725;SAR=48;SRF=184;SRP=387.964;SRR=543;TYPE=snp;ANN=G
chr5B	681742719	T	G	ALT1	REF	intergenic_region	MODIFIER	TRIDC5BG077160-TRIDC5BG077210	AB=0.378049;ABP=13.6028;AC=16;AF=0.0645161;AN=248;AO=37;CIGAR=1X;DP=517;DPB=517;DPRA=2.37056;EPP=3.06899;EPPR=8.23993;GTI=4;LEN=1;MEANALT=1;MQM=50.7568;MQMR=49.7729;NS=62;NUMALT=1;ODDS=2.20667;PAIRED=1;PAIREDR=1;PAO=0;PQA=0;PQR=0;PRO=0;QA=1383;QR=17827;RO=480;RPL=14;RPP=7.76406;RPPR=6.55704;RPR=23;RUN=1;SAF=23;SAP=7.76406;SAR=14;SRF=311;SRP=94.2302;SRR=169;TYPE=snp;ANN=G
chr5B	681742824	C	T	ALT1	REF	intergenic_region	MODIFIER	TRIDC5BG077160-TRIDC5BG077210	AB=0.476562;ABP=3.62103;AC=14;AF=0.0546875;AN=256;AO=73;CIGAR=1X;DP=909;DPB=909;DPRA=2.14824;EPP=3.04005;EPPR=22.2671;GTI=5;LEN=1;MEANALT=1.2;MQM=58.3973;MQMR=56.4916;NS=64;NUMALT=1;ODDS=0.0138463;PAIRED=1;PAIREDR=1;PAO=0;PQA=0;PQR=0;PRO=0;QA=2722;QR=31351;RO=834;RPL=29;RPP=9.70319;RPPR=87.3697;RPR=44;RUN=1;SAF=51;SAP=28.0269;SAR=22;SRF=515;SRP=103.033;SRR=319;TYPE=snp;ANN=T
chr5B	681743345	G	A	ALT1	REF	intergenic_region	MODIFIER	TRIDC5BG077160-TRIDC5BG077210	AB=0.538462;ABP=3.17734;AC=12;AF=0.0625;AN=192;AO=9;CIGAR=1X;DP=142;DPB=142;DPRA=1.29921;EPP=5.18177;EPPR=16.7412;GTI=6;LEN=1;MEANALT=1;MQM=70;MQMR=69.8571;NS=48;NUMALT=1;ODDS=1.25607;PAIRED=1;PAIREDR=1;PAO=0;PQA=0;PQR=0;PRO=0;QA=354;QR=5069;RO=133;RPL=4;RPP=3.25157;RPPR=30.4558;RPR=5;RUN=1;SAF=1;SAP=14.8328;SAR=8;SRF=24;SRP=120.972;SRR=109;TYPE=snp;ANN=A
chr5B	681747809	G	A	REF	ALT1	downstream_gene_variant	MODIFIER	TRIDC5BG077210	AB=0.4;ABP=7.35324;AC=151;AF=0.838889;AN=180;AO=121;CIGAR=1X;DP=161;DPB=161;DPRA=1.6477;EPP=36.1926;EPPR=8.43898;GTI=9;LEN=1;MEANALT=1;MQM=65.5289;MQMR=46.45;NS=45;NUMALT=1;ODDS=0.0261623;PAIRED=1;PAIREDR=1;PAO=0;PQA=0;PQR=0;PRO=0;QA=4477;QR=1505;RO=40;RPL=79;RPP=27.5784;RPPR=20.5992;RPR=42;RUN=1;SAF=62;SAP=3.17181;SAR=59;SRF=20;SRP=3.0103;SRR=20;TYPE=snp;ANN=A
chr5B	681747849	G	A	REF	ALT1	downstream_gene_variant	MODIFIER	TRIDC5BG077210	AB=0.44;ABP=3.79203;AC=119;AF=0.85;AN=140;AO=70;CIGAR=1X;DP=94;DPB=94;DPRA=1.89247;EPP=7.47733;EPPR=3.0103;GTI=9;LEN=1;MEANALT=1;MQM=67.0571;MQMR=45.5833;NS=35;NUMALT=1;ODDS=1.38874;PAIRED=1;PAIREDR=1;PAO=0;PQA=0;PQR=0;PRO=0;QA=2562;QR=876;RO=24;RPL=45;RPP=15.4187;RPPR=12.0581;RPR=25;RUN=1;SAF=18;SAP=38.8706;SAR=52;SRF=5;SRP=20.744;SRR=19;TYPE=snp;ANN=A
chr5B	681749777	C	A	REF	ALT1	3_prime_UTR_variant	MODIFIER	TRIDC5BG077210	AB=0.5;ABP=3.0103;AC=224;AF=0.949153;AN=236;AO=182;CIGAR=1X;DP=194;DPB=194;DPRA=2.23392;EPP=43.1467;EPPR=3.0103;GTI=5;LEN=1;MEANALT=1;MQM=70;MQMR=70;NS=59;NUMALT=1;ODDS=3.7287;PAIRED=1;PAIREDR=1;PAO=0;PQA=0;PQR=0;PRO=0;QA=7021;QR=415;RO=12;RPL=70;RPP=24.0569;RPPR=3.73412;RPR=112;RUN=1;SAF=130;SAP=75.5995;SAR=52;SRF=9;SRP=9.52472;SRR=3;TYPE=snp;ANN=A
chr5B	681749782	C	G	REF	ALT1	3_prime_UTR_variant	MODIFIER	TRIDC5BG077210	AB=0.5;ABP=3.0103;AC=221;AF=0.952586;AN=232;AO=184;CIGAR=1X;DP=195;DPB=195;DPRA=1.70536;EPP=54.4175;EPPR=7.94546;GTI=3;LEN=1;MEANALT=1;MQM=70;MQMR=70;NS=58;NUMALT=1;ODDS=4.17498;PAIRED=1;PAIREDR=1;PAO=0;PQA=0;PQR=0;PRO=0;QA=7072;QR=418;RO=11;RPL=67;RPP=32.514;RPPR=4.78696;RPR=117;RUN=1;SAF=132;SAP=78.5398;SAR=52;SRF=8;SRP=7.94546;SRR=3;TYPE=snp;ANN=G
chr5B	681750241	C	G	REF	ALT1	intron_variant	MODIFIER	TRIDC5BG077210	AB=0.528169;ABP=3.98899;AC=237;AF=0.940476;AN=252;AO=774;CIGAR=1X;DP=866;DPB=866;DPRA=1.15027;EPP=17.5541;EPPR=17.9243;GTI=6;LEN=1;MEANALT=1.01639;MQM=69.7817;MQMR=69.2967;NS=63;NUMALT=1;ODDS=0.21271;PAIRED=1;PAIREDR=1;PAO=0;PQA=0;PQR=0;PRO=0;QA=28623;QR=3336;RO=91;RPL=416;RPP=12.4481;RPPR=35.6778;RPR=358;RUN=1;SAF=207;SAP=366.606;SAR=567;SRF=12;SRP=110.128;SRR=79;TYPE=snp;ANN=G
chr5B	681750756	G	C	REF	ALT1	missense_variant	MODERATE	TRIDC5BG077210	AB=0.567757;ABP=20.0777;AC=240;AF=0.9375;AN=256;AO=2014;CIGAR=1X;DP=2230;DPB=2230;DPRA=3.60656;EPP=124.734;EPPR=16.837;GTI=9;LEN=1;MEANALT=1.01639;MQM=69.8967;MQMR=69.8186;NS=64;NUMALT=1;ODDS=0.450575;PAIRED=1;PAIREDR=1;PAO=0;PQA=0;PQR=0;PRO=0;QA=73654;QR=7795;RO=215;RPL=1115;RPP=53.3143;RPPR=14.0091;RPR=899;RUN=1;SAF=616;SAP=662.349;SAR=1398;SRF=63;SRP=83.0114;SRR=152;TYPE=snp;ANN=C
chr5B	681750899	G	A	ALT1	REF	missense_variant	MODERATE	TRIDC5BG077210	AB=0.329268;ABP=23.7717;AC=15;AF=0.0585938;AN=256;AO=40;CIGAR=1X;DP=923;DPB=923;DPRA=1.35386;EPP=8.43898;EPPR=27.2226;GTI=4;LEN=1;MEANALT=1;MQM=66.45;MQMR=65.7679;NS=64;NUMALT=1;ODDS=2.21305;PAIRED=1;PAIREDR=1;PAO=0;PQA=0;PQR=0;PRO=0;QA=1418;QR=32596;RO=879;RPL=22;RPP=3.87889;RPPR=14.7718;RPR=18;RUN=1;SAF=17;SAP=4.96463;SAR=23;SRF=520;SRP=67.0453;SRR=359;TYPE=snp;ANN=A
chr5B	681753174	GAAAAAAAT	GAAAAAAT	ALT1	REF	splice_region_variant&intron_variant	LOW	TRIDC5BG077210	AB=0.363636;ABP=8.34028;AC=14;AF=0.0564516;AN=248;AO=27;CIGAR=1M1D7M;DP=379;DPB=411.333;DPRA=1.65317;EPP=5.02092;EPPR=3.23238;GTI=3;LEN=1;MEANALT=1;MQM=70;MQMR=70;NS=62;NUMALT=1;ODDS=2.20977;PAIRED=1;PAIREDR=1;PAO=24.5;PQA=778;PQR=1180;PRO=36.5;QA=974;QR=13105;RO=352;RPL=9;RPP=9.52472;RPPR=3.109;RPR=18;RUN=1;SAF=20;SAP=16.6021;SAR=7;SRF=243;SRP=113.78;SRR=109;TYPE=del;ANN=GAAAAAAT
chr5B	681753346	A	C	ALT1	REF	upstream_gene_variant	MODIFIER	TRIDC5BG077210	AB=0.512821;ABP=3.06598;AC=15;AF=0.0604839;AN=248;AO=30;CIGAR=1X;DP=411;DPB=411;DPRA=1.54309;EPP=7.64277;EPPR=13.5485;GTI=4;LEN=1;MEANALT=1;MQM=70;MQMR=69.9186;NS=62;NUMALT=1;ODDS=1.19092;PAIRED=1;PAIREDR=1;PAO=0;PQA=0;PQR=0;PRO=0;QA=1128;QR=14161;RO=381;RPL=20;RPP=10.2485;RPPR=97.8541;RPR=10;RUN=1;SAF=9;SAP=13.4334;SAR=21;SRF=129;SRP=89.2366;SRR=252;TYPE=snp;ANN=C
chr5B	681753574	T	G	REF	ALT1	upstream_gene_variant	MODIFIER	TRIDC5BG077210	AB=0.424242;ABP=4.65535;AC=226;AF=0.896825;AN=252;AO=342;CIGAR=1X;DP=392;DPB=392;DPRA=1.00389;EPP=39.6841;EPPR=20.3821;GTI=7;LEN=1;MEANALT=1;MQM=70;MQMR=70;NS=63;NUMALT=1;ODDS=0.810045;PAIRED=1;PAIREDR=1;PAO=0;PQA=0;PQR=0;PRO=0;QA=12949;QR=1843;RO=50;RPL=157;RPP=7.98818;RPPR=3.18402;RPR=185;RUN=1;SAF=150;SAP=14.2105;SAR=192;SRF=21;SRP=5.78978;SRR=29;TYPE=snp;ANN=G
chr5B	681753784	G	C	REF	ALT1	upstream_gene_variant	MODIFIER	TRIDC5BG077210	AB=0.473684;ABP=3.12459;AC=232;AF=0.935484;AN=248;AO=314;CIGAR=1X;DP=338;DPB=338;DPRA=1.17676;EPP=5.25093;EPPR=12.0581;GTI=4;LEN=1;MEANALT=1;MQM=70;MQMR=70;NS=62;NUMALT=1;ODDS=1.07001;PAIRED=1;PAIREDR=1;PAO=0;PQA=0;PQR=0;PRO=0;QA=12021;QR=915;RO=24;RPL=144;RPP=7.68519;RPPR=3.0103;RPR=170;RUN=1;SAF=226;SAP=134.709;SAR=88;SRF=15;SRP=6.26751;SRR=9;TYPE=snp;ANN=C
chr5B	681753895	G	C	ALT1	REF	upstream_gene_variant	MODIFIER	TRIDC5BG077210	AB=0.307692;ABP=19.7139;AC=15;AF=0.0625;AN=240;AO=32;CIGAR=1X;DP=624;DPB=624;DPRA=1.34532;EPP=3.0103;EPPR=7.25054;GTI=4;LEN=1;MEANALT=1;MQM=70;MQMR=70;NS=60;NUMALT=1;ODDS=0.972882;PAIRED=1;PAIREDR=1;PAO=0;PQA=0;PQR=0;PRO=0;QA=1276;QR=22464;RO=592;RPL=16;RPP=3.0103;RPPR=11.4614;RPR=16;RUN=1;SAF=24;SAP=20.3821;SAR=8;SRF=297;SRP=3.02497;SRR=295;TYPE=snp;ANN=C
chr5B	681754504	C	T	ALT1	REF	5_prime_UTR_premature_start_codon_gain_variant	LOW	TRIDC5BG077210	AB=0.289474;ABP=17.6392;AC=15;AF=0.0604839;AN=248;AO=19;CIGAR=1X;DP=361;DPB=361;DPRA=1.66476;EPP=12.2676;EPPR=138.353;GTI=4;LEN=1;MEANALT=1;MQM=70;MQMR=70;NS=62;NUMALT=1;ODDS=3.62711;PAIRED=1;PAIREDR=1;PAO=0;PQA=0;PQR=0;PRO=0;QA=721;QR=13070;RO=342;RPL=9;RPP=3.12459;RPPR=110.314;RPR=10;RUN=1;SAF=15;SAP=16.8392;SAR=4;SRF=300;SRP=425.647;SRR=42;TYPE=snp;ANN=T
chr5B	681754613	C	T	ALT1	REF	5_prime_UTR_variant	MODIFIER	TRIDC5BG077210	AB=0.269231;ABP=39.0901;AC=14;AF=0.0555556;AN=252;AO=41;CIGAR=1X;DP=753;DPB=753;DPRA=1.73557;EPP=18.3165;EPPR=112.106;GTI=3;LEN=1;MEANALT=1;MQM=70;MQMR=70;NS=63;NUMALT=1;ODDS=1.10437;PAIRED=1;PAIREDR=1;PAO=0;PQA=0;PQR=0;PRO=0;QA=1533;QR=26265;RO=711;RPL=19;RPP=3.48696;RPPR=10.3432;RPR=22;RUN=1;SAF=17;SAP=5.60547;SAR=24;SRF=336;SRP=7.6556;SRR=375;TYPE=snp;ANN=T
chr5B	681794094	G	T	ALT1	REF	intergenic_region	MODIFIER	TRIDC5BG077210-TRIDC5BG077230	AB=0.454545;ABP=4.39215;AC=14;AF=0.0673077;AN=208;AO=39;CIGAR=1X;DP=322;DPB=322;DPRA=3.15934;EPP=4.40227;EPPR=16.5936;GTI=3;LEN=1;MEANALT=1;MQM=67.3077;MQMR=58.6418;NS=52;NUMALT=1;ODDS=0.877825;PAIRED=1;PAIREDR=1;PAO=0;PQA=0;PQR=0;PRO=0;QA=1390;QR=9713;RO=282;RPL=19;RPP=3.06598;RPPR=20.7517;RPR=20;RUN=1;SAF=25;SAP=9.74743;SAR=14;SRF=139;SRP=3.1335;SRR=143;TYPE=snp;ANN=T
chr5B	681794153	C	T	REF	ALT1	intergenic_region	MODIFIER	TRIDC5BG077210-TRIDC5BG077230	AB=0.633028;ABP=36.5187;AC=191;AF=0.823276;AN=232;AO=291;CIGAR=1X;DP=390;DPB=390;DPRA=2.8366;EPP=4.2714;EPPR=10.0615;GTI=13;LEN=1;MEANALT=1.07843;MQM=67.9553;MQMR=63.6067;NS=58;NUMALT=1;ODDS=0.293417;PAIRED=1;PAIREDR=1;PAO=0;PQA=0;PQR=0;PRO=0;QA=10303;QR=3278;RO=89;RPL=125;RPP=15.5541;RPPR=15.9171;RPR=166;RUN=1;SAF=159;SAP=8.45017;SAR=132;SRF=66;SRP=48.1232;SRR=23;TYPE=snp;ANN=T
chr5B	681794185	C	T	REF	ALT1	intergenic_region	MODIFIER	TRIDC5BG077210-TRIDC5BG077230	AB=0.582996;ABP=17.7886;AC=175;AF=0.767544;AN=228;AO=276;CIGAR=1X;DP=406;DPB=406;DPRA=2.63194;EPP=6.15736;EPPR=3.27756;GTI=16;LEN=1;MEANALT=1;MQM=62.279;MQMR=55.8692;NS=57;NUMALT=1;ODDS=0.291596;PAIRED=1;PAIREDR=1;PAO=0;PQA=0;PQR=0;PRO=0;QA=9777;QR=4726;RO=130;RPL=163;RPP=22.6794;RPPR=3.61163;RPR=113;RUN=1;SAF=139;SAP=3.04177;SAR=137;SRF=93;SRP=55.3929;SRR=37;TYPE=snp;ANN=T
chr5B	681794211	GCAACGGCTCTATGCTC	GCAACGGCTCTATGCTCAACGGCTCTATGCTC	REF	ALT1	intergenic_region	MODIFIER	TRIDC5BG077210-TRIDC5BG077230	AB=0.39604;ABP=12.4917;AC=98;AF=0.569767;AN=172;AO=89;CIGAR=1M15I16M;DP=213;DPB=366.294;DPRA=3.14286;EPP=8.49998;EPPR=3.47429;GTI=21;LEN=15;MEANALT=1.15625;MQM=46.1124;MQMR=53.6667;NS=43;NUMALT=1;ODDS=0.203053;PAIRED=1;PAIREDR=1;PAO=73.5;PQA=2319;PQR=2319;PRO=73.5;QA=2244;QR=4177;RO=117;RPL=42;RPP=3.62026;RPPR=23.2217;RPR=47;RUN=1;SAF=42;SAP=3.62026;SAR=47;SRF=80;SRP=37.327;SRR=37;TYPE=ins;ANN=GC…
chr5B	681794239	G	C	ALT1	REF	intergenic_region	MODIFIER	TRIDC5BG077210-TRIDC5BG077230	AB=0.418367;ABP=8.68272;AC=17;AF=0.0745614;AN=228;AO=50;CIGAR=1X;DP=381;DPB=381;DPRA=3.31934;EPP=3.18402;EPPR=3.33371;GTI=4;LEN=1;MEANALT=1;MQM=66.48;MQMR=49.5076;NS=57;NUMALT=1;ODDS=0.700566;PAIRED=1;PAIREDR=1;PAO=0;PQA=0;PQR=0;PRO=0;QA=1830;QR=11668;RO=329;RPL=30;RPP=7.35324;RPPR=22.976;RPR=20;RUN=1;SAF=28;SAP=4.57376;SAR=22;SRF=176;SRP=6.50182;SRR=153;TYPE=snp;ANN=C
chr5B	681794445	C	G	ALT1	REF	intergenic_region	MODIFIER	TRIDC5BG077210-TRIDC5BG077230	AB=0.117647;ABP=67.7713;AC=13;AF=0.0550847;AN=236;AO=10;CIGAR=1X;DP=375;DPB=375;DPRA=1.85625;EPP=3.0103;EPPR=4.72963;GTI=4;LEN=1;MEANALT=1;MQM=34.8;MQMR=57.6658;NS=59;NUMALT=1;ODDS=0.465865;PAIRED=1;PAIREDR=1;PAO=0;PQA=0;PQR=0;PRO=0;QA=372;QR=13777;RO=365;RPL=10;RPP=24.725;RPPR=93.0163;RPR=0;RUN=1;SAF=5;SAP=3.0103;SAR=5;SRF=110;SRP=128.093;SRR=255;TYPE=snp;ANN=G
chr5B	681866083	G	T	ALT1	REF	intergenic_region	MODIFIER	TRIDC5BG077230-TRIDC5BG077260	AB=0.428571;ABP=3.32051;AC=8;AF=0.04;AN=200;AO=6;CIGAR=1X;DP=202;DPB=202;DPRA=2.88235;EPP=8.80089;EPPR=5.84651;GTI=3;LEN=1;MEANALT=1;MQM=20.8333;MQMR=40.5255;NS=50;NUMALT=1;ODDS=7.27347;PAIRED=1;PAIREDR=1;PAO=0;PQA=0;PQR=0;PRO=0;QA=224;QR=7328;RO=196;RPL=3;RPP=3.0103;RPPR=14.3551;RPR=3;RUN=1;SAF=2;SAP=4.45795;SAR=4;SRF=84;SRP=11.6962;SRR=112;TYPE=snp;ANN=T
chr5B	681866106	G	A	REF	ALT1	intergenic_region	MODIFIER	TRIDC5BG077230-TRIDC5BG077260	AB=0.365079;ABP=22.9327;AC=63;AF=0.328125;AN=192;AO=57;CIGAR=1X;DP=196;DPB=196;DPRA=1.80603;EPP=4.877;EPPR=16.1485;GTI=25;LEN=1;MEANALT=1;MQM=42.7193;MQMR=41.8489;NS=48;NUMALT=1;ODDS=0.0299183;PAIRED=1;PAIREDR=1;PAO=0;PQA=0;PQR=0;PRO=0;QA=2077;QR=5072;RO=139;RPL=37;RPP=14.02;RPPR=9.89965;RPR=20;RUN=1;SAF=19;SAP=16.763;SAR=38;SRF=51;SRP=24.397;SRR=88;TYPE=snp;ANN=A
chr5B	681868425	G	C	REF	ALT1	intergenic_region	MODIFIER	TRIDC5BG077230-TRIDC5BG077260	AB=0.387097;ABP=6.44263;AC=27;AF=0.1875;AN=144;AO=20;CIGAR=1X;DP=78;DPB=78;DPRA=2.6;EPP=4.74748;EPPR=3.0103;GTI=8;LEN=1;MEANALT=1;MQM=50.15;MQMR=46.7414;NS=36;NUMALT=1;ODDS=0.640776;PAIRED=1;PAIREDR=1;PAO=0;PQA=0;PQR=0;PRO=0;QA=743;QR=2130;RO=58;RPL=9;RPP=3.44459;RPPR=5.40641;RPR=11;RUN=1;SAF=13;SAP=6.91895;SAR=7;SRF=30;SRP=3.16006;SRR=28;TYPE=snp;ANN=C
chr5B	681868489	A	G	REF	ALT1	intergenic_region	MODIFIER	TRIDC5BG077230-TRIDC5BG077260	AB=0.653846;ABP=13.7006;AC=44;AF=0.37931;AN=116;AO=39;CIGAR=1X;DP=75;DPB=75;DPRA=2.95556;EPP=3.06598;EPPR=3.25157;GTI=9;LEN=1;MEANALT=1;MQM=49.7179;MQMR=57.5;NS=29;NUMALT=1;ODDS=0.0809115;PAIRED=1;PAIREDR=1;PAO=0;PQA=0;PQR=0;PRO=0;QA=1435;QR=1321;RO=36;RPL=18;RPP=3.51141;RPPR=3.0103;RPR=21;RUN=1;SAF=31;SAP=32.4644;SAR=8;SRF=15;SRP=5.18177;SRR=21;TYPE=snp;ANN=G
chr5B	681912629	C	A	ALT1	REF	intergenic_region	MODIFIER	TRIDC5BG077260-TRIDC5BG077270	AB=0;ABP=0;AC=8;AF=0.25;AN=32;AO=3;CIGAR=1X;DP=9;DPB=9;DPRA=1.5;EPP=3.73412;EPPR=16.0391;GTI=1;LEN=1;MEANALT=1;MQM=18;MQMR=14;NS=8;NUMALT=1;ODDS=3.79316;PAIRED=1;PAIREDR=1;PAO=0;PQA=0;PQR=0;PRO=0;QA=110;QR=223;RO=6;RPL=1;RPP=3.73412;RPPR=3.0103;RPR=2;RUN=1;SAF=2;SAP=3.73412;SAR=1;SRF=3;SRP=3.0103;SRR=3;TYPE=snp;ANN=A
chr5B	681945598	AATATATATC	AATATATATATC	REF	ALT1	intergenic_region	MODIFIER	TRIDC5BG077260-TRIDC5BG077270	AB=0.642857;ABP=5.49198;AC=55;AF=0.392857;AN=140;AO=24;CIGAR=1M2I9M;DP=60;DPB=71.4;DPRA=1.24731;EPP=4.45795;EPPR=11.6962;GTI=8;LEN=2;MEANALT=1;MQM=70;MQMR=70;NS=35;NUMALT=1;ODDS=80.4188;PAIRED=1;PAIREDR=1;PAO=6;PQA=186.5;PQR=186.5;PRO=6;QA=911;QR=1372;RO=36;RPL=15;RPP=6.26751;RPPR=3.25157;RPR=9;RUN=1;SAF=5;SAP=20.744;SAR=19;SRF=13;SRP=9.04217;SRR=23;TYPE=ins;ANN=AATATATATATC
chr5B	681957544	ATTTTTTTTA	ATTTTTTTTTTA,ATTTTTTTTTA	ALT2	ALT1	upstream_gene_variant	MODIFIER	TRIDC5BG077270	AB=0.490196,0.470588;ABP=3.05288,3.3935;AC=122,50;AF=0.677778,0.277778;AN=180;AO=70,34;CIGAR=1M2I9M,1M1I9M;DP=113;DPB=145.7;DPRA=1.6632,1.66357;EPP=10.9517,3.26577;EPPR=0;GTI=10;LEN=2,1;MEANALT=1.51351,1.84211;MQM=70,70;MQMR=0;NS=45;NUMALT=2;ODDS=1.16124;PAIRED=1,1;PAIREDR=0;PAO=7.33333,7.33333;PQA=241.667,241.667;PQR=241.667;PRO=7.33333;QA=2482,1227;QR=0;RO=0;RPL=45,16;RPP=15.4187,3.26577;RPPR=0…
chr5B	681972575	C	T	ALT1	REF	3_prime_UTR_variant	MODIFIER	TRIDC5BG077270	AB=0.302158;ABP=97.524;AC=17;AF=0.0674603;AN=252;AO=97;CIGAR=1X;DP=1288;DPB=1288;DPRA=2.33501;EPP=37.0599;EPPR=256.675;GTI=3;LEN=1;MEANALT=1;MQM=69.8144;MQMR=69.5181;NS=63;NUMALT=1;ODDS=0.330494;PAIRED=1;PAIREDR=1;PAO=0;PQA=0;PQR=0;PRO=0;QA=3511;QR=43286;RO=1191;RPL=53;RPP=4.82359;RPPR=4.14982;RPR=44;RUN=1;SAF=50;SAP=3.21178;SAR=47;SRF=582;SRP=4.33944;SRR=609;TYPE=snp;ANN=T
chr5B	681978550	G	A	ALT1	REF	intergenic_region	MODIFIER	TRIDC5BG077270-TRIDC5BG077280	AB=0.6;ABP=3.44459;AC=17;AF=0.157407;AN=108;AO=6;CIGAR=1X;DP=43;DPB=43;DPRA=1.00571;EPP=8.80089;EPPR=24.1968;GTI=5;LEN=1;MEANALT=1;MQM=48.5;MQMR=47.2162;NS=27;NUMALT=1;ODDS=4.92313;PAIRED=1;PAIREDR=1;PAO=0;PQA=0;PQR=0;PRO=0;QA=223;QR=1338;RO=37;RPL=2;RPP=4.45795;RPPR=16.2152;RPR=4;RUN=1;SAF=3;SAP=3.0103;SAR=3;SRF=6;SRP=39.6906;SRR=31;TYPE=snp;ANN=A
chr5B	681978584	CAGC	TAGT,CAAT	ALT2	REF	intergenic_region	MODIFIER	TRIDC5BG077270-TRIDC5BG077280	AB=0.5,0.6;ABP=3.0103,3.44459;AC=6,9;AF=0.0535714,0.0803571;AN=112;AO=3,4;CIGAR=1X2M1X,2M2X;DP=42;DPB=42;DPRA=1.45455,1.41176;EPP=9.52472,5.18177;EPPR=8.03571;GTI=4;LEN=4,2;MEANALT=1,1;MQM=39,54.5;MQMR=46.3429;NS=28;NUMALT=2;ODDS=3.45401;PAIRED=1,1;PAIREDR=1;PAO=0,0;PQA=0,0;PQR=0;PRO=0;QA=102,156;QR=1369;RO=35;RPL=2,4;RPP=3.73412,11.6962;RPPR=3.56868;RPR=1,0;RUN=1,1;SAF=2,1;SAP=3.73412,5.18177;SA…
chr5B	681978605	C	A	ALT1	REF	intergenic_region	MODIFIER	TRIDC5BG077270-TRIDC5BG077280	AB=0.444444;ABP=3.25157;AC=14;AF=0.12963;AN=108;AO=6;CIGAR=1X;DP=39;DPB=39;DPRA=1.72857;EPP=3.0103;EPPR=26.7649;GTI=5;LEN=1;MEANALT=1;MQM=52.8333;MQMR=44.5758;NS=27;NUMALT=1;ODDS=1.88284;PAIRED=1;PAIREDR=1;PAO=0;PQA=0;PQR=0;PRO=0;QA=226;QR=1285;RO=33;RPL=4;RPP=4.45795;RPPR=17.8158;RPR=2;RUN=1;SAF=1;SAP=8.80089;SAR=5;SRF=6;SRP=32.0291;SRR=27;TYPE=snp;ANN=A
chr5B	682010188	G	T	REF	ALT1	intron_variant	MODIFIER	TRIDC5BG077280	AB=0.428571;ABP=3.32051;AC=107;AF=0.835938;AN=128;AO=47;CIGAR=1X;DP=56;DPB=56;DPRA=1.45714;EPP=47.41;EPPR=14.8328;GTI=5;LEN=1;MEANALT=1;MQM=70;MQMR=16.6667;NS=32;NUMALT=1;ODDS=3.3274;PAIRED=1;PAIREDR=1;PAO=0;PQA=0;PQR=0;PRO=0;QA=1826;QR=352;RO=9;RPL=37;RPP=36.6912;RPPR=9.04217;RPR=10;RUN=1;SAF=10;SAP=36.6912;SAR=37;SRF=3;SRP=5.18177;SRR=6;TYPE=snp;ANN=T
chr5B	682101668	T	A	ALT1	REF	downstream_gene_variant	MODIFIER	TRIDC5BG077290	AB=0.35;ABP=6.91895;AC=13;AF=0.0524194;AN=248;AO=16;CIGAR=1X;DP=406;DPB=406;DPRA=0.876923;EPP=7.89611;EPPR=181.869;GTI=3;LEN=1;MEANALT=1;MQM=68.625;MQMR=66.563;NS=62;NUMALT=1;ODDS=4.36789;PAIRED=1;PAIREDR=1;PAO=0;PQA=0;PQR=0;PRO=0;QA=591;QR=14250;RO=389;RPL=12;RPP=11.6962;RPPR=349.112;RPR=4;RUN=1;SAF=1;SAP=29.6108;SAR=15;SRF=41;SRP=529.126;SRR=348;TYPE=snp;ANN=A
chr5B	682110416	CTGT	CTGC	REF	ALT1	downstream_gene_variant	MODIFIER	TRIDC5BG077310	AB=0.300613;ABP=115.58;AC=41;AF=0.197115;AN=208;AO=105;CIGAR=3M1X;DP=395;DPB=420.5;DPRA=5.2987;EPP=3.19643;EPPR=177.098;GTI=24;LEN=1;MEANALT=1.85714;MQM=24.8381;MQMR=25.7303;NS=52;NUMALT=1;ODDS=0.290865;PAIRED=1;PAIREDR=1;PAO=19.5;PQA=613.5;PQR=676.5;PRO=21.5;QA=3812;QR=8394;RO=241;RPL=37;RPP=22.8844;RPPR=3.01931;RPR=68;RUN=1;SAF=51;SAP=3.19643;SAR=54;SRF=141;SRP=18.1565;SRR=100;TYPE=snp;ANN=CTGC
chr5B	682110425	A	G	ALT1	REF	downstream_gene_variant	MODIFIER	TRIDC5BG077310	AB=0.307692;ABP=99.0562;AC=68;AF=0.34;AN=200;AO=107;CIGAR=1X;DP=396;DPB=396;DPRA=2.55285;EPP=136.16;EPPR=30.9689;GTI=22;LEN=1;MEANALT=1;MQM=27.514;MQMR=24.218;NS=50;NUMALT=1;ODDS=0.0659473;PAIRED=1;PAIREDR=1;PAO=0;PQA=0;PQR=0;PRO=0;QA=3686;QR=10121;RO=289;RPL=51;RPP=3.51765;RPPR=7.70639;RPR=56;RUN=1;SAF=56;SAP=3.51765;SAR=51;SRF=156;SRP=6.98507;SRR=133;TYPE=snp;ANN=G
chr5B	682110430	C	T	ALT1	REF	downstream_gene_variant	MODIFIER	TRIDC5BG077310	AB=0.288136;ABP=118.025;AC=68;AF=0.346939;AN=196;AO=101;CIGAR=1X;DP=395;DPB=395;DPRA=2.34484;EPP=117.582;EPPR=27.8567;GTI=22;LEN=1;MEANALT=1;MQM=27.8218;MQMR=24.3571;NS=49;NUMALT=1;ODDS=0.119946;PAIRED=1;PAIREDR=1;PAO=0;PQA=0;PQR=0;PRO=0;QA=3493;QR=10540;RO=294;RPL=50;RPP=3.0318;RPPR=4.07388;RPR=51;RUN=1;SAF=48;SAP=3.54779;SAR=53;SRF=151;SRP=3.483;SRR=143;TYPE=snp;ANN=T
chr5B	682110497	T	C	ALT1	REF	downstream_gene_variant	MODIFIER	TRIDC5BG077310	AB=0.215311;ABP=150.141;AC=50;AF=0.245098;AN=204;AO=51;CIGAR=1X;DP=258;DPB=258;DPRA=6.08696;EPP=18.3809;EPPR=13.3923;GTI=18;LEN=1;MEANALT=1.17391;MQM=35.451;MQMR=25.0746;NS=51;NUMALT=1;ODDS=0.145917;PAIRED=1;PAIREDR=1;PAO=0;PQA=0;PQR=0;PRO=0;QA=1878;QR=7310;RO=201;RPL=32;RPP=10.206;RPPR=57.47;RPR=19;RUN=1;SAF=44;SAP=61.2994;SAR=7;SRF=22;SRP=269.302;SRR=179;TYPE=snp;ANN=C
chr5B	682110499	G	A	REF	ALT1	downstream_gene_variant	MODIFIER	TRIDC5BG077310	AB=0.4;ABP=3.87889;AC=14;AF=0.0714286;AN=196;AO=12;CIGAR=1X;DP=246;DPB=246;DPRA=5.59901;EPP=3.73412;EPPR=16.4103;GTI=6;LEN=1;MEANALT=1;MQM=19.9167;MQMR=26.812;NS=49;NUMALT=1;ODDS=5.39091;PAIRED=1;PAIREDR=1;PAO=0;PQA=0;PQR=0;PRO=0;QA=427;QR=8532;RO=234;RPL=8;RPP=5.9056;RPPR=45.9201;RPR=4;RUN=1;SAF=1;SAP=21.1059;SAR=11;SRF=59;SRP=127.879;SRR=175;TYPE=snp;ANN=A
chr5B	682115841	TTAGT	TTAGTAGT	REF	ALT1	upstream_gene_variant	MODIFIER	TRIDC5BG077310	AB=0.466667;ABP=3.73412;AC=70;AF=0.416667;AN=168;AO=45;CIGAR=1M3I4M;DP=111;DPB=149.6;DPRA=2.3392;EPP=3.44459;EPPR=16.582;GTI=23;LEN=3;MEANALT=1.04;MQM=45.4222;MQMR=52.0781;NS=42;NUMALT=1;ODDS=0.0676158;PAIRED=1;PAIREDR=1;PAO=6.5;PQA=229.5;PQR=229.5;PRO=6.5;QA=1344;QR=2383;RO=64;RPL=21;RPP=3.44459;RPPR=133.434;RPR=24;RUN=1;SAF=17;SAP=8.84915;SAR=28;SRF=23;SRP=14.0034;SRR=41;TYPE=ins;ANN=TTAGTAGT
chr5B	682121214	A	G	REF	ALT1	synonymous_variant	LOW	TRIDC5BG077320	AB=0.353261;ABP=37.4234;AC=159;AF=0.6625;AN=240;AO=211;CIGAR=1X;DP=452;DPB=452;DPRA=0.983607;EPP=3.02059;EPPR=9.57878;GTI=27;LEN=1;MEANALT=1;MQM=52.3033;MQMR=48.7759;NS=60;NUMALT=1;ODDS=0.0187422;PAIRED=1;PAIREDR=1;PAO=0;PQA=0;PQR=0;PRO=0;QA=8091;QR=9064;RO=241;RPL=91;RPP=11.6653;RPPR=24.6439;RPR=120;RUN=1;SAF=163;SAP=139.113;SAR=48;SRF=171;SRP=94.924;SRR=70;TYPE=snp;ANN=G
chr5B	682158745	C	T	ALT1	REF	intergenic_region	MODIFIER	TRIDC5BG077320-TRIDC5BG077330	AB=0.907692;ABP=96.8513;AC=228;AF=0.95;AN=240;AO=288;CIGAR=1X;DP=296;DPB=296;DPRA=5.06897;EPP=181.825;EPPR=20.3821;GTI=6;LEN=1;MEANALT=1;MQM=61.1493;MQMR=34.75;NS=60;NUMALT=1;ODDS=4.64657;PAIRED=1;PAIREDR=1;PAO=0;PQA=0;PQR=0;PRO=0;QA=11058;QR=313;RO=8;RPL=270;RPP=481.82;RPPR=20.3821;RPR=18;RUN=1;SAF=59;SAP=220.912;SAR=229;SRF=0;SRP=20.3821;SRR=8;TYPE=snp;ANN=T
chr5B	682158753	C	T	ALT1	REF	intergenic_region	MODIFIER	TRIDC5BG077320-TRIDC5BG077330	AB=0;ABP=0;AC=228;AF=0.966102;AN=236;AO=253;CIGAR=1X;DP=259;DPB=259;DPRA=4.50877;EPP=124.553;EPPR=7.35324;GTI=1;LEN=1;MEANALT=1.05263;MQM=61.498;MQMR=49.5;NS=59;NUMALT=1;ODDS=4.4028;PAIRED=1;PAIREDR=1;PAO=0;PQA=0;PQR=0;PRO=0;QA=9237;QR=76;RO=2;RPL=231;RPP=377.92;RPPR=7.35324;RPR=22;RUN=1;SAF=51;SAP=198.709;SAR=202;SRF=0;SRP=7.35324;SRR=2;TYPE=snp;ANN=T
chr5B	682203096	TCC	GCA,GCC,TCT	ALT2	REF	downstream_gene_variant	MODIFIER	TRIDC5BG077330	AB=0.25,0.416667,0.4;ABP=7.35324,22.5536,3.44459;AC=1,69,1;AF=0.00409836,0.282787,0.00409836;AN=244;AO=2,155,2;CIGAR=1X1M1X,1X2M,2M1X;DP=452;DPB=472;DPRA=1.75,2.04312,1.09375;EPP=7.35324,265.955,3.0103;EPPR=168.676;GTI=37;LEN=3,1,1;MEANALT=2,1.08889,2;MQM=18,16.7161,45;MQMR=19.9175;NS=61;NUMALT=3;ODDS=6.2486;PAIRED=1,1,1;PAIREDR=1;PAO=0,13,7.5;PQA=0,131,233;PQR=364;PRO=20.5;QA=39,2591,48;QR=10190…
chr5B	682206680	A	T	ALT1	REF	downstream_gene_variant	MODIFIER	TRIDC5BG077330	AB=0.28125;ABP=29.6108;AC=36;AF=0.155172;AN=232;AO=32;CIGAR=1X;DP=316;DPB=316;DPRA=1.36304;EPP=64.083;EPPR=421.676;GTI=19;LEN=1;MEANALT=1;MQM=17.5312;MQMR=12.5951;NS=58;NUMALT=1;ODDS=6.39777;PAIRED=1;PAIREDR=1;PAO=0;PQA=0;PQR=0;PRO=0;QA=1096;QR=9832;RO=284;RPL=7;RPP=24.9965;RPPR=3.0103;RPR=25;RUN=1;SAF=8;SAP=20.3821;SAR=24;SRF=155;SRP=8.17902;SRR=129;TYPE=snp;ANN=T
chr5B	682206922	T	C	ALT1	REF	downstream_gene_variant	MODIFIER	TRIDC5BG077330	AB=0.358491;ABP=12.2288;AC=71;AF=0.432927;AN=164;AO=44;CIGAR=1X;DP=110;DPB=110;DPRA=1.56;EPP=31.4368;EPPR=21.9613;GTI=27;LEN=1;MEANALT=1;MQM=50.4773;MQMR=69.5758;NS=41;NUMALT=1;ODDS=0.0614258;PAIRED=1;PAIREDR=1;PAO=0;PQA=0;PQR=0;PRO=0;QA=1577;QR=2434;RO=66;RPL=9;RPP=36.372;RPPR=9.45891;RPR=35;RUN=1;SAF=15;SAP=12.6832;SAR=29;SRF=43;SRP=16.1707;SRR=23;TYPE=snp;ANN=C
chr5B	682206940	GA	GAGTA	ALT1	REF	downstream_gene_variant	MODIFIER	TRIDC5BG077330	AB=0.37931;ABP=6.67934;AC=22;AF=0.122222;AN=180;AO=15;CIGAR=1M3I1M;DP=116;DPB=139.5;DPRA=1.39286;EPP=4.31318;EPPR=3.0318;GTI=10;LEN=3;MEANALT=1;MQM=37.6;MQMR=65.7129;NS=45;NUMALT=1;ODDS=5.83529;PAIRED=1;PAIREDR=1;PAO=1;PQA=35;PQR=35;PRO=1;QA=514;QR=3677;RO=101;RPL=13;RPP=20.5268;RPPR=26.4235;RPR=2;RUN=1;SAF=4;SAP=10.1038;SAR=11;SRF=47;SRP=4.06379;SRR=54;TYPE=ins;ANN=GAGTA
chr5B	682206943	CAG	TAC	ALT1	REF	downstream_gene_variant	MODIFIER	TRIDC5BG077330	AB=0.3125;ABP=12.7819;AC=53;AF=0.288043;AN=184;AO=22;CIGAR=1X1M1X;DP=119;DPB=120.333;DPRA=1.18151;EPP=12.8806;EPPR=5.65844;GTI=27;LEN=3;MEANALT=1.1875;MQM=66.3636;MQMR=65.6951;NS=46;NUMALT=1;ODDS=0.193157;PAIRED=1;PAIREDR=1;PAO=0;PQA=0;PQR=15.5;PRO=1.5;QA=770;QR=2968;RO=82;RPL=21;RPP=42.4916;RPPR=8.20065;RPR=1;RUN=1;SAF=5;SAP=17.2236;SAR=17;SRF=44;SRP=3.96363;SRR=38;TYPE=complex;ANN=TAC
chr5B	682208930	TACACAG	CACAAAT	REF	ALT1	intron_variant	MODIFIER	TRIDC5BG077330	AB=0;ABP=0;AC=52;AF=0.541667;AN=96;AO=37;CIGAR=1X3M1X1M1X;DP=60;DPB=60;DPRA=3.05917;EPP=10.1116;EPPR=0;GTI=10;LEN=7;MEANALT=1.46154;MQM=36.1892;MQMR=0;NS=24;NUMALT=1;ODDS=43.0228;PAIRED=1;PAIREDR=0;PAO=0;PQA=0;PQR=0;PRO=0;QA=1375;QR=0;RO=0;RPL=12;RPP=12.9286;RPPR=0;RPR=25;RUN=1;SAF=34;SAP=59.4099;SAR=3;SRF=0;SRP=0;SRR=0;TYPE=complex;ANN=CACAAAT
chr5B	682208968	T	C	ALT1	REF	missense_variant&splice_region_variant	MODERATE	TRIDC5BG077330	AB=0.26506;ABP=42.8032;AC=43;AF=0.358333;AN=120;AO=31;CIGAR=1X;DP=110;DPB=110;DPRA=5.11111;EPP=3.08035;EPPR=7.6556;GTI=10;LEN=1;MEANALT=1;MQM=57.129;MQMR=35.1899;NS=30;NUMALT=1;ODDS=1.00567;PAIRED=1;PAIREDR=1;PAO=0;PQA=0;PQR=0;PRO=0;QA=1127;QR=2915;RO=79;RPL=12;RPP=6.44263;RPPR=15.1321;RPR=19;RUN=1;SAF=8;SAP=18.771;SAR=23;SRF=60;SRP=49.2159;SRR=19;TYPE=snp;ANN=C
chr5B	682209000	G	T	ALT1	REF	synonymous_variant	LOW	TRIDC5BG077330	AB=0.292683;ABP=33.6228;AC=29;AF=0.233871;AN=124;AO=29;CIGAR=1X;DP=108;DPB=108;DPRA=6.55952;EPP=3.68421;EPPR=5.23675;GTI=7;LEN=1;MEANALT=1;MQM=54.8621;MQMR=35.3797;NS=31;NUMALT=1;ODDS=0.570183;PAIRED=1;PAIREDR=1;PAO=0;PQA=0;PQR=0;PRO=0;QA=1061;QR=2865;RO=79;RPL=16;RPP=3.68421;RPPR=3.25768;RPR=13;RUN=1;SAF=7;SAP=19.8579;SAR=22;SRF=55;SRP=29.4253;SRR=24;TYPE=snp;ANN=T
chr5B	682209083	C	T	ALT1	REF	missense_variant	MODERATE	TRIDC5BG077330	AB=0.19697;ABP=55.6521;AC=23;AF=0.23;AN=100;AO=16;CIGAR=1X;DP=87;DPB=87;DPRA=4.87879;EPP=16.582;EPPR=28.7315;GTI=10;LEN=1;MEANALT=1;MQM=55.5625;MQMR=54.4648;NS=25;NUMALT=1;ODDS=0.143035;PAIRED=1;PAIREDR=1;PAO=0;PQA=0;PQR=0;PRO=0;QA=532;QR=2460;RO=71;RPL=2;RPP=22.5536;RPPR=25.3061;RPR=14;RUN=1;SAF=1;SAP=29.6108;SAR=15;SRF=1;SRP=148.621;SRR=70;TYPE=snp;ANN=T
chr5B	682209091	G	A	ALT1	REF	missense_variant	MODERATE	TRIDC5BG077330	AB=0.197183;ABP=59.5603;AC=28;AF=0.25;AN=112;AO=18;CIGAR=1X;DP=94;DPB=94;DPRA=5.26316;EPP=20.3821;EPPR=8.61041;GTI=11;LEN=1;MEANALT=1;MQM=57.1667;MQMR=55.0263;NS=28;NUMALT=1;ODDS=0.318608;PAIRED=1;PAIREDR=1;PAO=0;PQA=0;PQR=0;PRO=0;QA=611;QR=2701;RO=76;RPL=2;RPP=26.6552;RPPR=12.2676;RPR=16;RUN=1;SAF=1;SAP=33.8935;SAR=17;SRF=2;SRP=151.128;SRR=74;TYPE=snp;ANN=A
chr5B	682209127	G	A	REF	ALT1	missense_variant	MODERATE	TRIDC5BG077330	AB=0.62069;ABP=10.3484;AC=62;AF=0.62;AN=100;AO=50;CIGAR=1X;DP=78;DPB=78;DPRA=3.78947;EPP=59.2949;EPPR=28.1373;GTI=11;LEN=1;MEANALT=1;MQM=62.26;MQMR=53.6071;NS=25;NUMALT=1;ODDS=0.132167;PAIRED=1;PAIREDR=1;PAO=0;PQA=0;PQR=0;PRO=0;QA=1856;QR=1008;RO=28;RPL=41;RPP=47.4821;RPPR=28.1373;RPR=9;RUN=1;SAF=2;SAP=94.907;SAR=48;SRF=2;SRP=47.6806;SRR=26;TYPE=snp;ANN=A
chr5B	682394028	GTT	GTTT	REF	ALT1	intergenic_region	MODIFIER	TRIDC5BG077330-TRIDC5BG077350	AB=0.666667;ABP=3.73412;AC=19;AF=0.791667;AN=24;AO=10;CIGAR=1M1I2M;DP=12;DPB=15.3333;DPRA=2.2;EPP=6.48466;EPPR=7.35324;GTI=1;LEN=1;MEANALT=1;MQM=50.6;MQMR=59;NS=6;NUMALT=1;ODDS=5.20167;PAIRED=1;PAIREDR=1;PAO=0;PQA=0;PQR=0;PRO=0;QA=349;QR=63;RO=2;RPL=1;RPP=16.9077;RPPR=7.35324;RPR=9;RUN=1;SAF=8;SAP=10.8276;SAR=2;SRF=2;SRP=7.35324;SRR=0;TYPE=ins;ANN=GTTT
chr5B	682394053	G	A	REF	ALT1	intergenic_region	MODIFIER	TRIDC5BG077330-TRIDC5BG077350	AB=0;ABP=0;AC=20;AF=0.5;AN=40;AO=6;CIGAR=1X;DP=22;DPB=22;DPRA=0.375;EPP=16.0391;EPPR=11.6962;GTI=4;LEN=1;MEANALT=1;MQM=39.8333;MQMR=53.5;NS=10;NUMALT=1;ODDS=1.28235;PAIRED=1;PAIREDR=1;PAO=0;PQA=0;PQR=0;PRO=0;QA=237;QR=614;RO=16;RPL=0;RPP=16.0391;RPPR=11.6962;RPR=6;RUN=1;SAF=6;SAP=16.0391;SAR=0;SRF=8;SRP=3.0103;SRR=8;TYPE=snp;ANN=A
chr5B	682394062	G	A	REF	ALT1	intergenic_region	MODIFIER	TRIDC5BG077330-TRIDC5BG077350	AB=0.5;ABP=3.0103;AC=10;AF=0.192308;AN=52;AO=4;CIGAR=1X;DP=29;DPB=29;DPRA=0.694444;EPP=11.6962;EPPR=3.09716;GTI=3;LEN=1;MEANALT=1;MQM=47.75;MQMR=46.68;NS=13;NUMALT=1;ODDS=0.610502;PAIRED=1;PAIREDR=1;PAO=0;PQA=0;PQR=0;PRO=0;QA=159;QR=956;RO=25;RPL=0;RPP=11.6962;RPPR=17.6895;RPR=4;RUN=1;SAF=4;SAP=11.6962;SAR=0;SRF=16;SRP=7.26639;SRR=9;TYPE=snp;ANN=A
chr5B	682394071	GGG	TGA	ALT1	REF	intergenic_region	MODIFIER	TRIDC5BG077330-TRIDC5BG077350	AB=0.8;ABP=6.91895;AC=19;AF=0.316667;AN=60;AO=16;CIGAR=1X1M1X;DP=31;DPB=31;DPRA=2.42857;EPP=16.582;EPPR=27.4756;GTI=1;LEN=3;MEANALT=1;MQM=55.0625;MQMR=38.2;NS=15;NUMALT=1;ODDS=30.2668;PAIRED=1;PAIREDR=1;PAO=0;PQA=0;PQR=0;PRO=0;QA=602;QR=596;RO=15;RPL=8;RPP=3.0103;RPPR=27.4756;RPR=8;RUN=1;SAF=7;SAP=3.55317;SAR=9;SRF=15;SRP=35.5824;SRR=0;TYPE=complex;ANN=TGA
chr5B	682394081	GCAG	ACAA,ACAG	REF	ALT2	intergenic_region	MODIFIER	TRIDC5BG077330-TRIDC5BG077350	AB=0.333333,0.5;ABP=5.18177,3.0103;AC=29,12;AF=0.483333,0.2;AN=60;AO=9,5;CIGAR=1X2M1X,1X3M;DP=30;DPB=30.75;DPRA=0.875,0.972222;EPP=9.04217,6.91895;EPPR=3.15506;GTI=6;LEN=4,1;MEANALT=1.25,1.5;MQM=29.3333,50;MQMR=55.7333;NS=15;NUMALT=2;ODDS=70.0523;PAIRED=1,1;PAIREDR=1;PAO=0,0;PQA=0,0;PQR=34;PRO=1;QA=361,190;QR=555;RO=15;RPL=2,1;RPP=9.04217,6.91895;RPPR=6.62942;RPR=7,4;RUN=1,1;SAF=9,5;SAP=22.5536,1…
chr5B	682394095	T	C	ALT1	REF	intergenic_region	MODIFIER	TRIDC5BG077330-TRIDC5BG077350	AB=0.8;ABP=6.91895;AC=19;AF=0.316667;AN=60;AO=16;CIGAR=1X;DP=31;DPB=31;DPRA=2.42857;EPP=3.55317;EPPR=6.62942;GTI=1;LEN=1;MEANALT=1;MQM=55.9375;MQMR=38.2;NS=15;NUMALT=1;ODDS=20.5553;PAIRED=1;PAIREDR=1;PAO=0;PQA=0;PQR=0;PRO=0;QA=615;QR=601;RO=15;RPL=12;RPP=11.6962;RPPR=6.62942;RPR=4;RUN=1;SAF=5;SAP=7.89611;SAR=11;SRF=15;SRP=35.5824;SRR=0;TYPE=snp;ANN=C
chr5B	682394118	C	T	ALT1	REF	intergenic_region	MODIFIER	TRIDC5BG077330-TRIDC5BG077350	AB=0.833333;ABP=8.80089;AC=19;AF=0.263889;AN=72;AO=14;CIGAR=1X;DP=32;DPB=32;DPRA=2.29412;EPP=3.63072;EPPR=15.074;GTI=3;LEN=1;MEANALT=1;MQM=53.2857;MQMR=41.4444;NS=18;NUMALT=1;ODDS=7.78843;PAIRED=1;PAIREDR=1;PAO=0;PQA=0;PQR=0;PRO=0;QA=518;QR=697;RO=18;RPL=8;RPP=3.63072;RPPR=15.074;RPR=6;RUN=1;SAF=2;SAP=18.5208;SAR=12;SRF=18;SRP=42.0968;SRR=0;TYPE=snp;ANN=T
chr5B	682742503	G	A	REF	ALT1	intergenic_region	MODIFIER	TRIDC5BG077330-TRIDC5BG077350	AB=0.406646;ABP=50.8514;AC=172;AF=0.671875;AN=256;AO=608;CIGAR=1X;DP=1161;DPB=1161;DPRA=1.5776;EPP=19.5249;EPPR=9.94957;GTI=29;LEN=1;MEANALT=1.02;MQM=68.824;MQMR=68.4167;NS=64;NUMALT=1;ODDS=0.0129452;PAIRED=1;PAIREDR=1;PAO=0;PQA=0;PQR=0;PRO=0;QA=21053;QR=19647;RO=552;RPL=303;RPP=3.02459;RPPR=24.5519;RPR=305;RUN=1;SAF=285;SAP=8.16755;SAR=323;SRF=284;SRP=4.01736;SRR=268;TYPE=snp;ANN=A
chr5B	682743164	AGATG	AGATGATG	ALT1	REF	intergenic_region	MODIFIER	TRIDC5BG077330-TRIDC5BG077350	AB=0.863309;ABP=162.371;AC=210;AF=0.905172;AN=232;AO=380;CIGAR=1M3I4M;DP=406;DPB=664.6;DPRA=0;EPP=5.77607;EPPR=3.79203;GTI=16;LEN=3;MEANALT=1.01724;MQM=43.15;MQMR=48.56;NS=58;NUMALT=1;ODDS=6.42735;PAIRED=1;PAIREDR=1;PAO=31.5;PQA=864.5;PQR=864.5;PRO=31.5;QA=11069;QR=792;RO=25;RPL=200;RPP=5.29606;RPPR=57.2971;RPR=180;RUN=1;SAF=145;SAP=49.2969;SAR=235;SRF=11;SRP=3.79203;SRR=14;TYPE=ins;ANN=AGATGATG
chr5B	682933348	G	C	ALT1	REF	intergenic_region	MODIFIER	TRIDC5BG077330-TRIDC5BG077350	AB=0;ABP=0;AC=12;AF=0.3;AN=40;AO=4;CIGAR=1X;DP=15;DPB=15;DPRA=0.848485;EPP=5.18177;EPPR=12.6832;GTI=2;LEN=1;MEANALT=1;MQM=20.25;MQMR=23.0909;NS=10;NUMALT=1;ODDS=7.49151;PAIRED=1;PAIREDR=1;PAO=0;PQA=0;PQR=0;PRO=0;QA=154;QR=407;RO=11;RPL=2;RPP=3.0103;RPPR=3.20771;RPR=2;RUN=1;SAF=3;SAP=5.18177;SAR=1;SRF=4;SRP=4.78696;SRR=7;TYPE=snp;ANN=C
chr5B	682933367	T	C	ALT1	REF	intergenic_region	MODIFIER	TRIDC5BG077330-TRIDC5BG077350	AB=0;ABP=0;AC=16;AF=0.4;AN=40;AO=7;CIGAR=1X;DP=17;DPB=17;DPRA=1.05;EPP=10.7656;EPPR=6.48466;GTI=3;LEN=1;MEANALT=1;MQM=21.2857;MQMR=22.8;NS=10;NUMALT=1;ODDS=6.45372;PAIRED=1;PAIREDR=1;PAO=0;PQA=0;PQR=0;PRO=0;QA=250;QR=351;RO=10;RPL=2;RPP=5.80219;RPPR=6.48466;RPR=5;RUN=1;SAF=3;SAP=3.32051;SAR=4;SRF=4;SRP=3.87889;SRR=6;TYPE=snp;ANN=C
chr5B	682933382	A	G	REF	ALT1	intergenic_region	MODIFIER	TRIDC5BG077330-TRIDC5BG077350	AB=0;ABP=0;AC=12;AF=0.375;AN=32;AO=6;CIGAR=1X;DP=15;DPB=15;DPRA=1.11111;EPP=3.0103;EPPR=14.8328;GTI=2;LEN=1;MEANALT=1;MQM=24.6667;MQMR=22.3333;NS=8;NUMALT=1;ODDS=4.51543;PAIRED=1;PAIREDR=1;PAO=0;PQA=0;PQR=0;PRO=0;QA=223;QR=316;RO=9;RPL=6;RPP=16.0391;RPPR=3.25157;RPR=0;RUN=1;SAF=3;SAP=3.0103;SAR=3;SRF=4;SRP=3.25157;SRR=5;TYPE=snp;ANN=G
chr5B	682933384	CGG	CG	ALT1	REF	intergenic_region	MODIFIER	TRIDC5BG077330-TRIDC5BG077350	AB=0;ABP=0;AC=12;AF=0.375;AN=32;AO=6;CIGAR=1M1D1M;DP=14;DPB=12;DPRA=1.25;EPP=16.0391;EPPR=3.0103;GTI=2;LEN=1;MEANALT=1;MQM=20.5;MQMR=25;NS=8;NUMALT=1;ODDS=6.40131;PAIRED=1;PAIREDR=1;PAO=0;PQA=0;PQR=0;PRO=0;QA=212;QR=283;RO=8;RPL=3;RPP=3.0103;RPPR=12.7819;RPR=3;RUN=1;SAF=3;SAP=3.0103;SAR=3;SRF=3;SRP=4.09604;SRR=5;TYPE=del;ANN=CG
chr5B	683006364	A	T	ALT1	REF	intergenic_region	MODIFIER	TRIDC5BG077350-TRIDC5BG077430	AB=0;ABP=0;AC=4;AF=0.04;AN=100;AO=2;CIGAR=1X;DP=39;DPB=39;DPRA=1.2973;EPP=3.0103;EPPR=4.47751;GTI=0;LEN=1;MEANALT=1;MQM=70;MQMR=70;NS=25;NUMALT=1;ODDS=2.18964;PAIRED=1;PAIREDR=1;PAO=0;PQA=0;PQR=0;PRO=0;QA=71;QR=1373;RO=37;RPL=2;RPP=7.35324;RPPR=4.47751;RPR=0;RUN=1;SAF=1;SAP=3.0103;SAR=1;SRF=23;SRP=7.76406;SRR=14;TYPE=snp;ANN=T
chr5B	683015180	T	C	REF	ALT1	intergenic_region	MODIFIER	TRIDC5BG077350-TRIDC5BG077430	AB=0;ABP=0;AC=12;AF=0.75;AN=16;AO=4;CIGAR=1X;DP=5;DPB=5;DPRA=1.33333;EPP=3.0103;EPPR=5.18177;GTI=0;LEN=1;MEANALT=1;MQM=44.75;MQMR=23;NS=4;NUMALT=1;ODDS=5.19432;PAIRED=1;PAIREDR=1;PAO=0;PQA=0;PQR=0;PRO=0;QA=156;QR=25;RO=1;RPL=1;RPP=5.18177;RPPR=5.18177;RPR=3;RUN=1;SAF=3;SAP=5.18177;SAR=1;SRF=1;SRP=5.18177;SRR=0;TYPE=snp;ANN=C
chr5B	683097305	G	A	ALT1	REF	intergenic_region	MODIFIER	TRIDC5BG077350-TRIDC5BG077430	AB=0.651163;ABP=11.5447;AC=82;AF=0.602941;AN=136;AO=53;CIGAR=1X;DP=88;DPB=88;DPRA=1.41667;EPP=12.2288;EPPR=4.56135;GTI=19;LEN=1;MEANALT=1;MQM=34.5849;MQMR=32.6571;NS=34;NUMALT=1;ODDS=0.253119;PAIRED=1;PAIREDR=1;PAO=0;PQA=0;PQR=0;PRO=0;QA=1920;QR=1303;RO=35;RPL=13;RPP=32.8783;RPPR=20.9405;RPR=40;RUN=1;SAF=32;SAP=7.96781;SAR=21;SRF=22;SRP=8.03571;SRR=13;TYPE=snp;ANN=A
chr5B	683097418	A	C	REF	ALT1	intergenic_region	MODIFIER	TRIDC5BG077350-TRIDC5BG077430	AB=0.285714;ABP=8.59409;AC=33;AF=0.217105;AN=152;AO=11;CIGAR=1X;DP=72;DPB=72;DPRA=1.15294;EPP=3.20771;EPPR=3.0459;GTI=10;LEN=1;MEANALT=1;MQM=23.5455;MQMR=40;NS=38;NUMALT=1;ODDS=7.93392;PAIRED=1;PAIREDR=1;PAO=0;PQA=0;PQR=0;PRO=0;QA=404;QR=2300;RO=61;RPL=0;RPP=26.8965;RPPR=4.7546;RPR=11;RUN=1;SAF=5;SAP=3.20771;SAR=6;SRF=21;SRP=15.8611;SRR=40;TYPE=snp;ANN=C
chr5B	683097463	GT	TC	REF	ALT1	intergenic_region	MODIFIER	TRIDC5BG077350-TRIDC5BG077430	AB=0.5;ABP=3.0103;AC=40;AF=0.294118;AN=136;AO=18;CIGAR=2X;DP=61;DPB=61;DPRA=1.3619;EPP=4.9405;EPPR=3.0608;GTI=14;LEN=2;MEANALT=1;MQM=21.5556;MQMR=44.3256;NS=34;NUMALT=1;ODDS=5.60276;PAIRED=1;PAIREDR=1;PAO=0;PQA=0;PQR=0;PRO=0;QA=615;QR=1606;RO=43;RPL=12;RPP=7.35324;RPPR=11.5447;RPR=6;RUN=1;SAF=5;SAP=10.7311;SAR=13;SRF=12;SRP=21.2406;SRR=31;TYPE=mnp;ANN=TC
chr5B	683628828	C	T	REF	ALT1	5_prime_UTR_variant	MODIFIER	TRIDC5BG077430	AB=0.5;ABP=3.0103;AC=26;AF=0.8125;AN=32;AO=8;CIGAR=1X;DP=10;DPB=10;DPRA=1.28571;EPP=4.09604;EPPR=5.18177;GTI=1;LEN=1;MEANALT=1;MQM=28.875;MQMR=26;NS=8;NUMALT=1;ODDS=7.35941;PAIRED=1;PAIREDR=1;PAO=0;PQA=0;PQR=0;PRO=0;QA=297;QR=41;RO=1;RPL=8;RPP=20.3821;RPPR=5.18177;RPR=0;RUN=1;SAF=3;SAP=4.09604;SAR=5;SRF=0;SRP=5.18177;SRR=1;TYPE=snp;ANN=T
chr5B	683705958	G	A	REF	ALT1	intergenic_region	MODIFIER	TRIDC5BG077430-TRIDC5BG077450	AB=0.375;ABP=4.09604;AC=20;AF=0.263158;AN=76;AO=8;CIGAR=1X;DP=33;DPB=33;DPRA=1.11429;EPP=4.09604;EPPR=13.5202;GTI=6;LEN=1;MEANALT=1;MQM=50.625;MQMR=49.24;NS=19;NUMALT=1;ODDS=0.288248;PAIRED=1;PAIREDR=1;PAO=0;PQA=0;PQR=0;PRO=0;QA=293;QR=873;RO=25;RPL=8;RPP=20.3821;RPPR=5.18177;RPR=0;RUN=1;SAF=3;SAP=4.09604;SAR=5;SRF=13;SRP=3.09716;SRR=12;TYPE=snp;ANN=A
chr5B	683705970	CGGG	TGGG	ALT1	REF	intergenic_region	MODIFIER	TRIDC5BG077430-TRIDC5BG077450	AB=0.5;ABP=3.0103;AC=48;AF=0.631579;AN=76;AO=16;CIGAR=1X3M;DP=29;DPB=29;DPRA=1.21154;EPP=5.18177;EPPR=3.44459;GTI=10;LEN=1;MEANALT=1.23077;MQM=45.375;MQMR=44.2;NS=19;NUMALT=1;ODDS=0.437404;PAIRED=1;PAIREDR=1;PAO=0;PQA=0;PQR=0;PRO=0;QA=533;QR=186;RO=5;RPL=5;RPP=7.89611;RPPR=13.8677;RPR=11;RUN=1;SAF=7;SAP=3.55317;SAR=9;SRF=2;SRP=3.44459;SRR=3;TYPE=snp;ANN=TGGG
chr5B	683724366	G	A	ALT1	REF	intergenic_region	MODIFIER	TRIDC5BG077430-TRIDC5BG077450	AB=0.510448;ABP=3.32792;AC=133;AF=0.53629;AN=248;AO=189;CIGAR=1X;DP=362;DPB=362;DPRA=3.05172;EPP=60.9277;EPPR=46.7033;GTI=13;LEN=1;MEANALT=1;MQM=35.9418;MQMR=37.3988;NS=62;NUMALT=1;ODDS=0.193525;PAIRED=1;PAIREDR=1;PAO=0;PQA=0;PQR=0;PRO=0;QA=6872;QR=6070;RO=173;RPL=115;RPP=22.3238;RPPR=40.9797;RPR=74;RUN=1;SAF=66;SAP=40.3389;SAR=123;SRF=65;SRP=26.2187;SRR=108;TYPE=snp;ANN=A
chr5B	683733247	G	A	REF	ALT1	intron_variant	MODIFIER	TRIDC5BG077450	AB=0.502451;ABP=3.03159;AC=171;AF=0.667969;AN=256;AO=819;CIGAR=1X;DP=1283;DPB=1283;DPRA=1.30524;EPP=22.1665;EPPR=45.3376;GTI=10;LEN=1;MEANALT=1.02083;MQM=69.6129;MQMR=69.7084;NS=64;NUMALT=1;ODDS=0.270403;PAIRED=1;PAIREDR=1;PAO=0;PQA=0;PQR=0;PRO=0;QA=31136;QR=17641;RO=463;RPL=544;RPP=194.866;RPPR=181.348;RPR=275;RUN=1;SAF=194;SAP=495.532;SAR=625;SRF=86;SRP=400.165;SRR=377;TYPE=snp;ANN=A
chr5B	683734944	A	G	REF	ALT1	upstream_gene_variant	MODIFIER	TRIDC5BG077450	AB=0.351792;ABP=61.5835;AC=173;AF=0.675781;AN=256;AO=744;CIGAR=1X;DP=1210;DPB=1210;DPRA=1.0698;EPP=15.7239;EPPR=22.0969;GTI=14;LEN=1;MEANALT=1;MQM=70;MQMR=70;NS=64;NUMALT=1;ODDS=0.0231253;PAIRED=1;PAIREDR=1;PAO=0;PQA=0;PQR=0;PRO=0;QA=27817;QR=16260;RO=466;RPL=363;RPP=3.95594;RPPR=10.466;RPR=381;RUN=1;SAF=370;SAP=3.057;SAR=374;SRF=212;SRP=11.2302;SRR=254;TYPE=snp;ANN=G
chr5B	683735585	C	A	ALT1	REF	upstream_gene_variant	MODIFIER	TRIDC5BG077450	AB=0.547069;ABP=13.8445;AC=76;AF=0.296875;AN=256;AO=617;CIGAR=1X;DP=2188;DPB=2188;DPRA=1.10268;EPP=3.80217;EPPR=31.2754;GTI=12;LEN=1;MEANALT=1;MQM=70;MQMR=70;NS=64;NUMALT=1;ODDS=0.235693;PAIRED=1;PAIREDR=1;PAO=0;PQA=0;PQR=0;PRO=0;QA=23731;QR=59403;RO=1571;RPL=344;RPP=20.7516;RPPR=30.4903;RPR=273;RUN=1;SAF=231;SAP=87.564;SAR=386;SRF=614;SRP=165.627;SRR=957;TYPE=snp;ANN=A
chr5B	683735998	G	A	ALT1	REF	upstream_gene_variant	MODIFIER	TRIDC5BG077450	AB=0.463602;ABP=6.01375;AC=82;AF=0.320312;AN=256;AO=626;CIGAR=1X;DP=2068;DPB=2068;DPRA=1.01792;EPP=13.1253;EPPR=44.5638;GTI=17;LEN=1;MEANALT=1;MQM=70;MQMR=70;NS=64;NUMALT=1;ODDS=0.0651877;PAIRED=1;PAIREDR=1;PAO=0;PQA=0;PQR=0;PRO=0;QA=24415;QR=54657;RO=1440;RPL=309;RPP=3.2323;RPPR=13.6505;RPR=317;RUN=1;SAF=291;SAP=9.72591;SAR=335;SRF=671;SRP=17.4928;SRR=769;TYPE=snp;ANN=A
chr5B	683748553	G	T	ALT1	REF	upstream_gene_variant	MODIFIER	TRIDC5BG077490	AB=0.394286;ABP=19.9974;AC=69;AF=0.302632;AN=228;AO=151;CIGAR=1X;DP=419;DPB=419;DPRA=2.71958;EPP=4.17513;EPPR=42.7126;GTI=24;LEN=1;MEANALT=1;MQM=70;MQMR=70;NS=57;NUMALT=1;ODDS=0.186594;PAIRED=1;PAIREDR=1;PAO=0;PQA=0;PQR=0;PRO=0;QA=5486;QR=9790;RO=268;RPL=72;RPP=3.71495;RPPR=71.5899;RPR=79;RUN=1;SAF=137;SAP=220.575;SAR=14;SRF=255;SRP=477.526;SRR=13;TYPE=snp;ANN=T
chr5B	683748731	AGTGTGGTGTGTGGTG	AGTGTGGTGTGTGGTGTGTGGTG	ALT1	REF	upstream_gene_variant	MODIFIER	TRIDC5BG077490	AB=0.551771;ABP=20.0981;AC=66;AF=0.261905;AN=252;AO=549;CIGAR=1M7I15M;DP=1788;DPB=2315.94;DPRA=1.91905;EPP=3.0459;EPPR=5.47731;GTI=8;LEN=7;MEANALT=1.7037;MQM=70;MQMR=70;NS=63;NUMALT=1;ODDS=0.13691;PAIRED=1;PAIREDR=1;PAO=286;PQA=9078.5;PQR=9078.5;PRO=286;QA=17409;QR=42465;RO=1205;RPL=259;RPP=6.81137;RPPR=27.6786;RPR=290;RUN=1;SAF=333;SAP=57.1547;SAR=216;SRF=663;SRP=29.3941;SRR=542;TYPE=ins;ANN=AGT…
chr5B	683751479	T	C	ALT1	REF	downstream_gene_variant	MODIFIER	TRIDC5BG077490	AB=0.382979;ABP=14.1911;AC=39;AF=0.154762;AN=252;AO=107;CIGAR=1X;DP=667;DPB=667;DPRA=1.35747;EPP=5.46589;EPPR=50.0978;GTI=11;LEN=1;MEANALT=1.07692;MQM=70;MQMR=70;NS=63;NUMALT=1;ODDS=0.0052729;PAIRED=1;PAIREDR=1;PAO=0;PQA=0;PQR=0;PRO=0;QA=4002;QR=20689;RO=558;RPL=50;RPP=4.00471;RPPR=24.3203;RPR=57;RUN=1;SAF=60;SAP=6.44001;SAR=47;SRF=370;SRP=131.913;SRR=188;TYPE=snp;ANN=C
chr5B	683751532	G	A	ALT1	REF	downstream_gene_variant	MODIFIER	TRIDC5BG077490	AB=0.624;ABP=19.7046;AC=31;AF=0.123016;AN=252;AO=130;CIGAR=1X;DP=911;DPB=911;DPRA=1.49086;EPP=29.7361;EPPR=3.63749;GTI=6;LEN=1;MEANALT=1;MQM=70;MQMR=69.8575;NS=63;NUMALT=1;ODDS=11.6512;PAIRED=1;PAIREDR=1;PAO=0;PQA=0;PQR=0;PRO=0;QA=4830;QR=28688;RO=779;RPL=57;RPP=7.28643;RPPR=53.8127;RPR=73;RUN=1;SAF=84;SAP=27.1303;SAR=46;SRF=529;SRP=219.993;SRR=250;TYPE=snp;ANN=A
chr5B	683753306	CTGCGTAG	TTGCGTAG	REF	ALT1	downstream_gene_variant	MODIFIER	TRIDC5BG077490	AB=0.354839;ABP=8.68415;AC=167;AF=0.818627;AN=204;AO=103;CIGAR=1X7M;DP=145;DPB=161.25;DPRA=2.26638;EPP=66.7841;EPPR=10.7656;GTI=19;LEN=1;MEANALT=1.2093;MQM=56.3495;MQMR=61;NS=51;NUMALT=1;ODDS=0.811466;PAIRED=1;PAIREDR=1;PAO=16.5;PQA=364;PQR=84;PRO=2.5;QA=3724;QR=1028;RO=28;RPL=24;RPP=66.7841;RPPR=14.1779;RPR=79;RUN=1;SAF=101;SAP=209.637;SAR=2;SRF=27;SRP=55.4358;SRR=1;TYPE=snp;ANN=TTGCGTAG
chr5B	683753314	CTTATGCGAT	GTCATAGAGT	REF	ALT1	downstream_gene_variant	MODIFIER	TRIDC5BG077490	AB=0.323529;ABP=12.2071;AC=170;AF=0.867347;AN=196;AO=91;CIGAR=1X1M1X2M4X1M;DP=136;DPB=138.1;DPRA=2.21729;EPP=8.37933;EPPR=4.76149;GTI=20;LEN=10;MEANALT=1.21951;MQM=60.6154;MQMR=61.871;NS=49;NUMALT=1;ODDS=0.799686;PAIRED=1;PAIREDR=1;PAO=0.333333;PQA=0;PQR=103;PRO=3.33333;QA=3020;QR=1137;RO=31;RPL=37;RPP=9.90651;RPPR=8.68415;RPR=54;RUN=1;SAF=90;SAP=192.024;SAR=1;SRF=29;SRP=54.0749;SRR=2;TYPE=comple…
chr5B	683753336	TC	TT	REF	ALT1	downstream_gene_variant	MODIFIER	TRIDC5BG077490	AB=0.375;ABP=10.6105;AC=198;AF=0.868421;AN=228;AO=182;CIGAR=1M1X;DP=260;DPB=260;DPRA=3.5625;EPP=61.473;EPPR=9.41879;GTI=29;LEN=1;MEANALT=1.45833;MQM=61.5604;MQMR=63.8537;NS=57;NUMALT=1;ODDS=0.506748;PAIRED=1;PAIREDR=1;PAO=0;PQA=0;PQR=0;PRO=0;QA=6660;QR=1494;RO=41;RPL=90;RPP=3.05802;RPPR=3.48696;RPR=92;RUN=1;SAF=144;SAP=137.069;SAR=38;SRF=34;SRP=41.6201;SRR=7;TYPE=snp;ANN=TT
chr5B	683753380	GAG	AAA	REF	ALT1	downstream_gene_variant	MODIFIER	TRIDC5BG077490	AB=0.535885;ABP=5.34801;AC=163;AF=0.727679;AN=224;AO=234;CIGAR=1X1M1X;DP=350;DPB=350.333;DPRA=3.38;EPP=228.843;EPPR=57.5966;GTI=22;LEN=3;MEANALT=1;MQM=60.1111;MQMR=41.1293;NS=56;NUMALT=1;ODDS=0.164806;PAIRED=1;PAIREDR=1;PAO=0;PQA=0;PQR=27;PRO=1;QA=7896;QR=4001;RO=116;RPL=88;RPP=34.2275;RPPR=4.20835;RPR=146;RUN=1;SAF=57;SAP=136.639;SAR=177;SRF=67;SRP=9.07545;SRR=49;TYPE=complex;ANN=AAA
chr5B	683753389	T	C	REF	ALT1	downstream_gene_variant	MODIFIER	TRIDC5BG077490	AB=0.4375;ABP=5.18177;AC=198;AF=0.9;AN=220;AO=280;CIGAR=1X;DP=326;DPB=326;DPRA=2.03205;EPP=159.387;EPPR=15.095;GTI=7;LEN=1;MEANALT=1;MQM=53.1036;MQMR=61.913;NS=55;NUMALT=1;ODDS=1.78188;PAIRED=1;PAIREDR=1;PAO=0;PQA=0;PQR=0;PRO=0;QA=9886;QR=1609;RO=46;RPL=123;RPP=11.9754;RPPR=3.0103;RPR=157;RUN=1;SAF=78;SAP=122.255;SAR=202;SRF=22;SRP=3.19912;SRR=24;TYPE=snp;ANN=C
chr5B	683753419	ATCT	GTCC	REF	ALT1	downstream_gene_variant	MODIFIER	TRIDC5BG077490	AB=0.455172;ABP=5.54119;AC=155;AF=0.704545;AN=220;AO=147;CIGAR=1X2M1X;DP=244;DPB=246;DPRA=2.36735;EPP=280.264;EPPR=14.8527;GTI=27;LEN=4;MEANALT=1;MQM=58.449;MQMR=39.8763;NS=55;NUMALT=1;ODDS=0.0237365;PAIRED=1;PAIREDR=1;PAO=0;PQA=0;PQR=123;PRO=4;QA=5717;QR=3468;RO=97;RPL=146;RPP=313.59;RPPR=80.9371;RPR=1;RUN=1;SAF=4;SAP=288.419;SAR=143;SRF=26;SRP=48.3426;SRR=71;TYPE=complex;ANN=GTCC
chr5B	683753427	C	G	REF	ALT1	downstream_gene_variant	MODIFIER	TRIDC5BG077490	AB=0.467626;ABP=4.27569;AC=159;AF=0.722727;AN=220;AO=147;CIGAR=1X;DP=238;DPB=238;DPRA=2.5269;EPP=288.419;EPPR=20.4059;GTI=25;LEN=1;MEANALT=1;MQM=58.449;MQMR=39.2527;NS=55;NUMALT=1;ODDS=0.0466469;PAIRED=1;PAIREDR=1;PAO=0;PQA=0;PQR=0;PRO=0;QA=5615;QR=3128;RO=91;RPL=147;RPP=322.217;RPPR=116.619;RPR=0;RUN=1;SAF=4;SAP=288.419;SAR=143;SRF=23;SRP=51.3315;SRR=68;TYPE=snp;ANN=G
chr5B	683757223	G	T	ALT1	REF	intergenic_region	MODIFIER	TRIDC5BG077490-TRIDC5BG077530	AB=0.0864198;ABP=123.353;AC=31;AF=0.121094;AN=256;AO=43;CIGAR=1X;DP=1409;DPB=1409;DPRA=0.578335;EPP=3.46479;EPPR=73.8353;GTI=9;LEN=1;MEANALT=1;MQM=66.0233;MQMR=63.9275;NS=64;NUMALT=1;ODDS=0.725773;PAIRED=1;PAIREDR=1;PAO=0;PQA=0;PQR=0;PRO=0;QA=1607;QR=50144;RO=1365;RPL=4;RPP=64.872;RPPR=521.684;RPR=39;RUN=1;SAF=20;SAP=3.46479;SAR=23;SRF=642;SRP=13.4477;SRR=723;TYPE=snp;ANN=T
chr5B	683757246	C	T	REF	ALT1	intergenic_region	MODIFIER	TRIDC5BG077490-TRIDC5BG077530	AB=0.871429;ABP=86.8912;AC=229;AF=0.894531;AN=256;AO=1317;CIGAR=1X;DP=1365;DPB=1365;DPRA=3.61252;EPP=175.028;EPPR=5.9056;GTI=7;LEN=1;MEANALT=1;MQM=66.1185;MQMR=66.4375;NS=64;NUMALT=1;ODDS=1.00397;PAIRED=1;PAIREDR=1;PAO=0;PQA=0;PQR=0;PRO=0;QA=48828;QR=1789;RO=48;RPL=559;RPP=68.3045;RPPR=9.52472;RPR=758;RUN=1;SAF=568;SAP=57.0267;SAR=749;SRF=24;SRP=3.0103;SRR=24;TYPE=snp;ANN=T
chr5B	683757251	CGCT	TGCA	REF	ALT1	intergenic_region	MODIFIER	TRIDC5BG077490-TRIDC5BG077530	AB=0.803922;ABP=43.9277;AC=224;AF=0.875;AN=256;AO=509;CIGAR=1X2M1X;DP=589;DPB=619.25;DPRA=1.64142;EPP=63.4233;EPPR=4.57376;GTI=14;LEN=4;MEANALT=1.38596;MQM=70;MQMR=68.32;NS=64;NUMALT=1;ODDS=0.732751;PAIRED=1;PAIREDR=1;PAO=0;PQA=0;PQR=2024.5;PRO=59.5;QA=17849;QR=1831;RO=50;RPL=259;RPP=3.35586;RPPR=3.18402;RPR=250;RUN=1;SAF=270;SAP=7.11007;SAR=239;SRF=24;SRP=3.18402;SRR=26;TYPE=complex;ANN=TGCA
chr5B	683757505	TG	GG	REF	ALT1	intergenic_region	MODIFIER	TRIDC5BG077490-TRIDC5BG077530	AB=0.547619;ABP=3.83753;AC=212;AF=0.868852;AN=244;AO=246;CIGAR=1X1M;DP=297;DPB=301.5;DPRA=1.00815;EPP=3.89301;EPPR=6.75262;GTI=11;LEN=1;MEANALT=1.03636;MQM=70;MQMR=68.6809;NS=61;NUMALT=1;ODDS=0.802333;PAIRED=1;PAIREDR=1;PAO=4.5;PQA=0;PQR=0;PRO=4.5;QA=9031;QR=1729;RO=47;RPL=84;RPP=56.7145;RPPR=31.8863;RPR=162;RUN=1;SAF=190;SAP=161.51;SAR=56;SRF=37;SRP=36.6912;SRR=10;TYPE=snp;ANN=GG
chr5B	683758898	TTCCA	ATCTC	REF	ALT1	intergenic_region	MODIFIER	TRIDC5BG077490-TRIDC5BG077530	AB=0.586207;ABP=4.88226;AC=125;AF=0.822368;AN=152;AO=83;CIGAR=1X2M2X;DP=104;DPB=104.8;DPRA=1.97917;EPP=113.546;EPPR=20.4855;GTI=7;LEN=5;MEANALT=1;MQM=66.6627;MQMR=70;NS=38;NUMALT=1;ODDS=1.95636;PAIRED=1;PAIREDR=1;PAO=0;PQA=0;PQR=33;PRO=1;QA=3096;QR=779;RO=21;RPL=6;RPP=134.895;RPPR=40.3389;RPR=77;RUN=1;SAF=80;SAP=158.127;SAR=3;SRF=18;SRP=26.2761;SRR=3;TYPE=complex;ANN=ATCTC
chr5B	683759195	G	A	REF	ALT1	intergenic_region	MODIFIER	TRIDC5BG077490-TRIDC5BG077530	AB=0.571066;ABP=20.2939;AC=106;AF=0.434426;AN=244;AO=240;CIGAR=1X;DP=460;DPB=460;DPRA=2.85142;EPP=3.04649;EPPR=122.441;GTI=14;LEN=1;MEANALT=1;MQM=69.1125;MQMR=65.7045;NS=61;NUMALT=1;ODDS=0.114535;PAIRED=1;PAIREDR=1;PAO=0;PQA=0;PQR=0;PRO=0;QA=8646;QR=8036;RO=220;RPL=111;RPP=5.94179;RPPR=268.483;RPR=129;RUN=1;SAF=88;SAP=40.0701;SAR=152;SRF=33;SRP=237.095;SRR=187;TYPE=snp;ANN=A
chr5B	683759210	CACAGCTA	CACAGTTA	REF	ALT1	intergenic_region	MODIFIER	TRIDC5BG077490-TRIDC5BG077530	AB=0.556962;ABP=5.23675;AC=185;AF=0.825893;AN=224;AO=221;CIGAR=5M1X2M;DP=290;DPB=303;DPRA=2.51852;EPP=5.84992;EPPR=7.73089;GTI=24;LEN=1;MEANALT=1.33333;MQM=68.2534;MQMR=70;NS=56;NUMALT=1;ODDS=1.11252;PAIRED=1;PAIREDR=1;PAO=11;PQA=362;PQR=431;PRO=13;QA=7980;QR=1631;RO=46;RPL=85;RPP=28.5669;RPPR=3.76559;RPR=136;RUN=1;SAF=95;SAP=12.4528;SAR=126;SRF=11;SRP=30.2009;SRR=35;TYPE=snp;ANN=CACAGTTA
chr5B	683759225	C	T	REF	ALT1	intergenic_region	MODIFIER	TRIDC5BG077490-TRIDC5BG077530	AB=0.583333;ABP=7.35324;AC=185;AF=0.840909;AN=220;AO=223;CIGAR=1X;DP=270;DPB=270;DPRA=2.17034;EPP=49.3707;EPPR=6.75262;GTI=11;LEN=1;MEANALT=1;MQM=67.2466;MQMR=68.8298;NS=55;NUMALT=1;ODDS=0.70437;PAIRED=1;PAIREDR=1;PAO=0;PQA=0;PQR=0;PRO=0;QA=8279;QR=1688;RO=47;RPL=141;RPP=36.9067;RPPR=3.42611;RPR=82;RUN=1;SAF=85;SAP=30.3631;SAR=138;SRF=13;SRP=23.3852;SRR=34;TYPE=snp;ANN=T
chr5B	683759241	AC	GT	REF	ALT1	intergenic_region	MODIFIER	TRIDC5BG077490-TRIDC5BG077530	AB=0.517241;ABP=3.16006;AC=160;AF=0.816327;AN=196;AO=178;CIGAR=2X;DP=225;DPB=225;DPRA=2.03922;EPP=33.5085;EPPR=26.8965;GTI=12;LEN=2;MEANALT=1.07143;MQM=66.6742;MQMR=70;NS=49;NUMALT=1;ODDS=0.923135;PAIRED=1;PAIREDR=1;PAO=0;PQA=0;PQR=0;PRO=0;QA=5704;QR=1561;RO=44;RPL=135;RPP=106.265;RPPR=4.78696;RPR=43;RUN=1;SAF=75;SAP=12.5745;SAR=103;SRF=14;SRP=15.6443;SRR=30;TYPE=mnp;ANN=GT
chr5B	683759252	A	G	REF	ALT1	intergenic_region	MODIFIER	TRIDC5BG077490-TRIDC5BG077530	AB=0.559322;ABP=4.81373;AC=179;AF=0.813636;AN=220;AO=188;CIGAR=1X;DP=234;DPB=234;DPRA=1.82128;EPP=34.2425;EPPR=45.4956;GTI=12;LEN=1;MEANALT=1;MQM=65.6436;MQMR=68.6087;NS=55;NUMALT=1;ODDS=0.042745;PAIRED=1;PAIREDR=1;PAO=0;PQA=0;PQR=0;PRO=0;QA=6677;QR=1678;RO=46;RPL=151;RPP=153.119;RPPR=6.03148;RPR=37;RUN=1;SAF=93;SAP=3.0565;SAR=95;SRF=17;SRP=9.80795;SRR=29;TYPE=snp;ANN=G
chr5B	683759293	G	C	REF	ALT1	intergenic_region	MODIFIER	TRIDC5BG077490-TRIDC5BG077530	AB=0.4;ABP=3.44459;AC=55;AF=0.55;AN=100;AO=18;CIGAR=1X;DP=84;DPB=84;DPRA=0.222222;EPP=10.7311;EPPR=59.1679;GTI=24;LEN=1;MEANALT=1;MQM=30.7222;MQMR=70;NS=25;NUMALT=1;ODDS=3.74019;PAIRED=1;PAIREDR=1;PAO=0;PQA=0;PQR=0;PRO=0;QA=657;QR=2481;RO=65;RPL=17;RPP=33.8935;RPPR=20.6827;RPR=1;RUN=1;SAF=4;SAP=15.074;SAR=14;SRF=54;SRP=64.7803;SRR=11;TYPE=snp;ANN=C
chr5B	683759298	G	A	REF	ALT1	intergenic_region	MODIFIER	TRIDC5BG077490-TRIDC5BG077530	AB=0.333333;ABP=4.45795;AC=51;AF=0.51;AN=100;AO=17;CIGAR=1X;DP=85;DPB=85;DPRA=0.257812;EPP=18.4661;EPPR=57.4916;GTI=20;LEN=1;MEANALT=1;MQM=33.4706;MQMR=69.5522;NS=25;NUMALT=1;ODDS=4.44418;PAIRED=1;PAIREDR=1;PAO=0;PQA=0;PQR=0;PRO=0;QA=563;QR=2517;RO=67;RPL=17;RPP=39.9253;RPPR=23.2666;RPR=0;RUN=1;SAF=3;SAP=18.4661;SAR=14;SRF=57;SRP=74.6041;SRR=10;TYPE=snp;ANN=A
chr5B	683759357	T	C	REF	ALT1	intergenic_region	MODIFIER	TRIDC5BG077490-TRIDC5BG077530	AB=0.30137;ABP=28.0269;AC=199;AF=0.829167;AN=240;AO=178;CIGAR=1X;DP=313;DPB=313;DPRA=0.419414;EPP=172.873;EPPR=4.31318;GTI=20;LEN=1;MEANALT=1;MQM=62.4663;MQMR=70;NS=60;NUMALT=1;ODDS=0.232069;PAIRED=1;PAIREDR=1;PAO=0;PQA=0;PQR=0;PRO=0;QA=6727;QR=4950;RO=135;RPL=11;RPP=299.892;RPPR=35.5824;RPR=167;RUN=1;SAF=155;SAP=215.571;SAR=23;SRF=106;SRP=98.3782;SRR=29;TYPE=snp;ANN=C
chr5B	683759362	TAGC	CGGA	REF	ALT1	intergenic_region	MODIFIER	TRIDC5BG077490-TRIDC5BG077530	AB=0.26087;ABP=37.2818;AC=198;AF=0.825;AN=240;AO=170;CIGAR=2X1M1X;DP=310;DPB=314.75;DPRA=0.388112;EPP=55.33;EPPR=4.92817;GTI=15;LEN=4;MEANALT=1.05769;MQM=63.3706;MQMR=70;NS=60;NUMALT=1;ODDS=0.0579569;PAIRED=1;PAIREDR=1;PAO=0;PQA=0;PQR=241;PRO=9;QA=5951;QR=4893;RO=137;RPL=34;RPP=135.904;RPPR=47.5334;RPR=136;RUN=1;SAF=151;SAP=225.573;SAR=19;SRF=103;SRP=78.4729;SRR=34;TYPE=complex;ANN=CGGA
chr5B	683759381	GAGGACC	AAAGACG	REF	ALT1	intergenic_region	MODIFIER	TRIDC5BG077490-TRIDC5BG077530	AB=0.359649;ABP=22.5155;AC=213;AF=0.845238;AN=252;AO=402;CIGAR=1X1M1X3M1X;DP=574;DPB=579.857;DPRA=0.68118;EPP=264.451;EPPR=25.5711;GTI=11;LEN=7;MEANALT=1.19643;MQM=64.194;MQMR=70;NS=63;NUMALT=1;ODDS=0.103528;PAIRED=1;PAIREDR=1;PAO=1;PQA=16;PQR=306;PRO=12;QA=14580;QR=5377;RO=154;RPL=35;RPP=598.404;RPPR=14.0651;RPR=367;RUN=1;SAF=336;SAP=396.792;SAR=66;SRF=100;SRP=32.8469;SRR=54;TYPE=complex;ANN=AAA…
chr5B	683759420	ATCT	GTCC	REF	ALT1	intergenic_region	MODIFIER	TRIDC5BG077490-TRIDC5BG077530	AB=0.60274;ABP=23.089;AC=215;AF=0.839844;AN=256;AO=773;CIGAR=1X2M1X;DP=942;DPB=948.25;DPRA=1.17877;EPP=26.2729;EPPR=16.4054;GTI=8;LEN=4;MEANALT=1.05172;MQM=66.6598;MQMR=69.0482;NS=64;NUMALT=1;ODDS=0.554403;PAIRED=1;PAIREDR=1;PAO=0;PQA=0;PQR=330;PRO=12;QA=27591;QR=5994;RO=166;RPL=334;RPP=33.9812;RPPR=59.9918;RPR=439;RUN=1;SAF=565;SAP=361.034;SAR=208;SRF=73;SRP=8.24276;SRR=93;TYPE=complex;ANN=GTCC
chr5B	683759528	GAT	GT	REF	ALT1	intergenic_region	MODIFIER	TRIDC5BG077490-TRIDC5BG077530	AB=0.305556;ABP=14.8328;AC=216;AF=0.857143;AN=252;AO=411;CIGAR=1M1D1M;DP=478;DPB=484.333;DPRA=1.55033;EPP=21.4018;EPPR=32.6213;GTI=9;LEN=1;MEANALT=1;MQM=63.0633;MQMR=70;NS=63;NUMALT=1;ODDS=2.06601;PAIRED=1;PAIREDR=1;PAO=212.5;PQA=7857;PQR=7924;PRO=214.5;QA=14857;QR=2458;RO=66;RPL=230;RPP=15.6957;RPPR=72.629;RPR=181;RUN=1;SAF=122;SAP=150.359;SAR=289;SRF=8;SRP=85.263;SRR=58;TYPE=del;ANN=GT
chr5B	683759967	C	G	REF	ALT1	intergenic_region	MODIFIER	TRIDC5BG077490-TRIDC5BG077530	AB=0.297297;ABP=42.625;AC=200;AF=0.819672;AN=244;AO=309;CIGAR=1X;DP=664;DPB=664;DPRA=0.213516;EPP=3.35464;EPPR=27.4255;GTI=23;LEN=1;MEANALT=1.01887;MQM=58.411;MQMR=70;NS=61;NUMALT=1;ODDS=0.00432766;PAIRED=1;PAIREDR=1;PAO=0;PQA=0;PQR=0;PRO=0;QA=11637;QR=13192;RO=353;RPL=58;RPP=264.775;RPPR=5.7231;RPR=251;RUN=1;SAF=203;SAP=69.1313;SAR=106;SRF=216;SRP=41.4017;SRR=137;TYPE=snp;ANN=G
chr5B	683759985	CTT	CT	REF	ALT1	intergenic_region	MODIFIER	TRIDC5BG077490-TRIDC5BG077530	AB=0.521552;ABP=3.94628;AC=173;AF=0.720833;AN=240;AO=273;CIGAR=1M1D1M;DP=643;DPB=558.333;DPRA=0.195818;EPP=55.1972;EPPR=20.2169;GTI=19;LEN=1;MEANALT=1;MQM=57.4982;MQMR=68.8152;NS=60;NUMALT=1;ODDS=0.152393;PAIRED=1;PAIREDR=1;PAO=5.5;PQA=97;PQR=166;PRO=7.5;QA=10245;QR=13608;RO=368;RPL=94;RPP=60.4788;RPPR=13.4192;RPR=179;RUN=1;SAF=148;SAP=7.21802;SAR=125;SRF=194;SRP=5.3706;SRR=174;TYPE=del;ANN=CT
chr5B	683760006	G	T	REF	ALT1	intergenic_region	MODIFIER	TRIDC5BG077490-TRIDC5BG077530	AB=0.288288;ABP=46.2246;AC=200;AF=0.819672;AN=244;AO=281;CIGAR=1X;DP=640;DPB=640;DPRA=0.223404;EPP=116.151;EPPR=43.6001;GTI=27;LEN=1;MEANALT=1.14815;MQM=56.2847;MQMR=70;NS=61;NUMALT=1;ODDS=0.0429638;PAIRED=1;PAIREDR=1;PAO=0;PQA=0;PQR=0;PRO=0;QA=10731;QR=13129;RO=351;RPL=209;RPP=148.051;RPPR=3.31344;RPR=72;RUN=1;SAF=133;SAP=4.74902;SAR=148;SRF=156;SRP=12.42;SRR=195;TYPE=snp;ANN=T
chr5B	683760047	TCAC	TTAC	REF	ALT1	intergenic_region	MODIFIER	TRIDC5BG077490-TRIDC5BG077530	AB=0.361111;ABP=9.04217;AC=175;AF=0.78125;AN=224;AO=116;CIGAR=1M1X2M;DP=418;DPB=436.5;DPRA=0.125765;EPP=36.0317;EPPR=12.9526;GTI=22;LEN=1;MEANALT=1.04444;MQM=44;MQMR=70;NS=56;NUMALT=1;ODDS=0.377167;PAIRED=1;PAIREDR=1;PAO=12.3333;PQA=413;PQR=594.5;PRO=17.8333;QA=3370;QR=11037;RO=299;RPL=84;RPP=53.6281;RPPR=20.4474;RPR=32;RUN=1;SAF=5;SAP=213.344;SAR=111;SRF=108;SRP=53.0413;SRR=191;TYPE=snp;ANN=TTAC
chr5B	683760053	TCT	TT	REF	ALT1	intergenic_region	MODIFIER	TRIDC5BG077490-TRIDC5BG077530	AB=0.692308;ABP=7.18621;AC=147;AF=0.720588;AN=204;AO=81;CIGAR=1M1D1M;DP=377;DPB=362.333;DPRA=0.120352;EPP=5.18177;EPPR=12.0274;GTI=46;LEN=1;MEANALT=1;MQM=41.0123;MQMR=69.8712;NS=51;NUMALT=1;ODDS=0.000314916;PAIRED=1;PAIREDR=1;PAO=11;PQA=390.5;PQR=586.5;PRO=17;QA=3061;QR=11142;RO=295;RPL=49;RPP=10.7579;RPPR=14.2063;RPR=32;RUN=1;SAF=4;SAP=145.872;SAR=77;SRF=104;SRP=58.7251;SRR=191;TYPE=del;ANN=TT
chr5B	683760061	G	T	REF	ALT1	intergenic_region	MODIFIER	TRIDC5BG077490-TRIDC5BG077530	AB=0.28125;ABP=16.3106;AC=128;AF=0.711111;AN=180;AO=62;CIGAR=1X;DP=348;DPB=348;DPRA=0.104563;EPP=4.27115;EPPR=26.8206;GTI=42;LEN=1;MEANALT=1;MQM=34.5;MQMR=69.8671;NS=45;NUMALT=1;ODDS=0.107693;PAIRED=1;PAIREDR=1;PAO=0;PQA=0;PQR=0;PRO=0;QA=2347;QR=10885;RO=286;RPL=34;RPP=4.27115;RPPR=51.6027;RPR=28;RUN=1;SAF=0;SAP=137.642;SAR=62;SRF=104;SRP=49.2034;SRR=182;TYPE=snp;ANN=T
chr5B	683760065	TTTGTTTTTTCAT	TT	REF	ALT1	intergenic_region	MODIFIER	TRIDC5BG077490-TRIDC5BG077530	AB=0.909091;ABP=19.0002;AC=77;AF=0.566176;AN=136;AO=32;CIGAR=1M11D1M;DP=278;DPB=289.308;DPRA=0.116713;EPP=20.3821;EPPR=56.4321;GTI=30;LEN=11;MEANALT=1.04545;MQM=24.5938;MQMR=70;NS=34;NUMALT=1;ODDS=4.05363;PAIRED=1;PAIREDR=1;PAO=8.5;PQA=182.5;PQR=2453.5;PRO=75.5;QA=1143;QR=9226;RO=241;RPL=24;RPP=20.3821;RPPR=84.3279;RPR=8;RUN=1;SAF=0;SAP=72.4974;SAR=32;SRF=83;SRP=53.693;SRR=158;TYPE=del;ANN=TT
chr5B	683760080	TTC	ATT	REF	ALT1	intergenic_region	MODIFIER	TRIDC5BG077490-TRIDC5BG077530	AB=0.142857;ABP=26.2761;AC=83;AF=0.628788;AN=132;AO=32;CIGAR=1X1M1X;DP=313;DPB=317;DPRA=0.0996169;EPP=35.8538;EPPR=7.90983;GTI=31;LEN=3;MEANALT=1.09091;MQM=24.5938;MQMR=70;NS=33;NUMALT=1;ODDS=0.648417;PAIRED=1;PAIREDR=1;PAO=0;PQA=0;PQR=172;PRO=5;QA=1256;QR=10366;RO=277;RPL=27;RPP=35.8538;RPPR=51.9351;RPR=5;RUN=1;SAF=0;SAP=72.4974;SAR=32;SRF=81;SRP=106.684;SRR=196;TYPE=complex;ANN=ATT
chr5B	683760093	CCC	TCT	REF	ALT1	intergenic_region	MODIFIER	TRIDC5BG077490-TRIDC5BG077530	AB=0.333333;ABP=7.35324;AC=132;AF=0.75;AN=176;AO=71;CIGAR=1X1M1X;DP=290;DPB=305.333;DPRA=0.117931;EPP=4.50892;EPPR=19.6781;GTI=46;LEN=3;MEANALT=1;MQM=22.0845;MQMR=70;NS=44;NUMALT=1;ODDS=0.311111;PAIRED=1;PAIREDR=1;PAO=0;PQA=0;PQR=784;PRO=27;QA=2673;QR=8102;RO=219;RPL=32;RPP=4.50892;RPPR=16.5845;RPR=39;RUN=1;SAF=0;SAP=157.185;SAR=71;SRF=67;SRP=74.6491;SRR=152;TYPE=complex;ANN=TCT
chr5B	683760105	T	C	REF	ALT1	intergenic_region	MODIFIER	TRIDC5BG077490-TRIDC5BG077530	AB=0.375;ABP=6.26751;AC=131;AF=0.761628;AN=172;AO=71;CIGAR=1X;DP=288;DPB=288;DPRA=0.112697;EPP=3.04088;EPPR=31.1194;GTI=21;LEN=1;MEANALT=1;MQM=22.0845;MQMR=70;NS=43;NUMALT=1;ODDS=169.811;PAIRED=1;PAIREDR=1;PAO=0;PQA=0;PQR=0;PRO=0;QA=2771;QR=8072;RO=217;RPL=35;RPP=3.04088;RPPR=10.3052;RPR=36;RUN=1;SAF=0;SAP=157.185;SAR=71;SRF=60;SRP=97.1641;SRR=157;TYPE=snp;ANN=C
chr5B	683760122	TTC	CTT	REF	ALT1	intergenic_region	MODIFIER	TRIDC5BG077490-TRIDC5BG077530	AB=0.666667;ABP=3.73412;AC=107;AF=0.722973;AN=148;AO=45;CIGAR=1X1M1X;DP=220;DPB=224.667;DPRA=0.115079;EPP=4.21667;EPPR=49.182;GTI=26;LEN=3;MEANALT=1;MQM=16.8444;MQMR=70;NS=37;NUMALT=1;ODDS=5.08383;PAIRED=1;PAIREDR=1;PAO=0;PQA=0;PQR=220;PRO=8;QA=1766;QR=6419;RO=175;RPL=25;RPP=4.21667;RPPR=4.01538;RPR=20;RUN=1;SAF=0;SAP=100.727;SAR=45;SRF=40;SRP=114.996;SRR=135;TYPE=complex;ANN=CTT
chr5B	683760138	C	T	REF	ALT1	intergenic_region	MODIFIER	TRIDC5BG077490-TRIDC5BG077530	AB=0.666667;ABP=3.73412;AC=99;AF=0.707143;AN=140;AO=40;CIGAR=1X;DP=216;DPB=216;DPRA=0.112553;EPP=89.8692;EPPR=5.80219;GTI=24;LEN=1;MEANALT=1.03846;MQM=17.6;MQMR=70;NS=35;NUMALT=1;ODDS=5.86576;PAIRED=1;PAIREDR=1;PAO=0;PQA=0;PQR=0;PRO=0;QA=1559;QR=6631;RO=175;RPL=40;RPP=89.8692;RPPR=5.10732;RPR=0;RUN=1;SAF=0;SAP=89.8692;SAR=40;SRF=28;SRP=178.726;SRR=147;TYPE=snp;ANN=T
chr5B	683761751	C	T	REF	ALT1	intergenic_region	MODIFIER	TRIDC5BG077490-TRIDC5BG077530	AB=0.0555556;ABP=33.8935;AC=29;AF=0.381579;AN=76;AO=12;CIGAR=1X;DP=128;DPB=128;DPRA=0.402778;EPP=29.068;EPPR=12.0706;GTI=12;LEN=1;MEANALT=1;MQM=70;MQMR=70;NS=19;NUMALT=1;ODDS=0.0831871;PAIRED=1;PAIREDR=1;PAO=0;PQA=0;PQR=0;PRO=0;QA=445;QR=4461;RO=116;RPL=0;RPP=29.068;RPPR=61.7149;RPR=12;RUN=1;SAF=12;SAP=29.068;SAR=0;SRF=99;SRP=128.881;SRR=17;TYPE=snp;ANN=T
chr5B	683761758	C	A	REF	ALT1	intergenic_region	MODIFIER	TRIDC5BG077490-TRIDC5BG077530	AB=0.15;ABP=24.2907;AC=57;AF=0.548077;AN=104;AO=21;CIGAR=1X;DP=143;DPB=143;DPRA=0.265397;EPP=48.6112;EPPR=10.1299;GTI=22;LEN=1;MEANALT=1;MQM=67.2381;MQMR=70;NS=26;NUMALT=1;ODDS=0.649218;PAIRED=1;PAIREDR=1;PAO=0;PQA=0;PQR=0;PRO=0;QA=752;QR=4434;RO=122;RPL=0;RPP=48.6112;RPPR=40.6729;RPR=21;RUN=1;SAF=21;SAP=48.6112;SAR=0;SRF=103;SRP=128.6;SRR=19;TYPE=snp;ANN=A
chr5B	683761771	AT	ACCATCTAAAAAGTAAGACTGAACCCTT	REF	ALT1	intergenic_region	MODIFIER	TRIDC5BG077490-TRIDC5BG077530	AB=0.2;ABP=30.3709;AC=87;AF=0.639706;AN=136;AO=35;CIGAR=1M26I1M;DP=172;DPB=740.5;DPRA=0.279126;EPP=79.0118;EPPR=28.6135;GTI=48;LEN=26;MEANALT=1.20833;MQM=69.7143;MQMR=70;NS=34;NUMALT=1;ODDS=0.0339173;PAIRED=1;PAIREDR=1;PAO=1.33333;PQA=10.3333;PQR=10.3333;PRO=1.33333;QA=1120;QR=4838;RO=129;RPL=0;RPP=79.0118;RPPR=3.43113;RPR=35;RUN=1;SAF=35;SAP=79.0118;SAR=0;SRF=95;SRP=65.6463;SRR=34;TYPE=ins;ANN=A…
chr5B	683761828	GTGT	GTGC	REF	ALT1	intergenic_region	MODIFIER	TRIDC5BG077490-TRIDC5BG077530	AB=0.519231;ABP=3.17734;AC=205;AF=0.840164;AN=244;AO=234;CIGAR=3M1X;DP=347;DPB=354;DPRA=0.458096;EPP=103.381;EPPR=16.355;GTI=17;LEN=1;MEANALT=1.01887;MQM=65.7949;MQMR=70;NS=61;NUMALT=1;ODDS=0.228219;PAIRED=1;PAIREDR=1;PAO=5.5;PQA=169;PQR=202;PRO=6.5;QA=8559;QR=3939;RO=110;RPL=138;RPP=19.3799;RPPR=9.40627;RPR=96;RUN=1;SAF=183;SAP=164.701;SAR=51;SRF=42;SRP=16.355;SRR=68;TYPE=snp;ANN=GTGC
chr5B	683761878	G	A	REF	ALT1	intergenic_region	MODIFIER	TRIDC5BG077490-TRIDC5BG077530	AB=0.56;ABP=4.57376;AC=209;AF=0.842742;AN=248;AO=253;CIGAR=1X;DP=342;DPB=342;DPRA=0.608071;EPP=30.8961;EPPR=3.0347;GTI=14;LEN=1;MEANALT=1;MQM=66.9723;MQMR=70;NS=62;NUMALT=1;ODDS=0.194753;PAIRED=1;PAIREDR=1;PAO=0;PQA=0;PQR=0;PRO=0;QA=9392;QR=3326;RO=89;RPL=133;RPP=4.46081;RPPR=4.98658;RPR=120;RUN=1;SAF=109;SAP=13.5243;SAR=144;SRF=22;SRP=52.4174;SRR=67;TYPE=snp;ANN=A
chr5B	683761883	TA	TAGGTGACCACATCCA	REF	ALT1	intergenic_region	MODIFIER	TRIDC5BG077490-TRIDC5BG077530	AB=0.677083;ABP=29.1584;AC=201;AF=0.810484;AN=248;AO=198;CIGAR=1M14I1M;DP=296;DPB=1730.5;DPRA=0.537037;EPP=10.424;EPPR=3.0103;GTI=12;LEN=14;MEANALT=1.07407;MQM=66.1414;MQMR=70;NS=62;NUMALT=1;ODDS=0.0261601;PAIRED=1;PAIREDR=1;PAO=20.5;PQA=716.5;PQR=716.5;PRO=20.5;QA=6102;QR=3349;RO=94;RPL=101;RPP=3.18577;RPPR=12.2506;RPR=97;RUN=1;SAF=63;SAP=59.8634;SAR=135;SRF=26;SRP=43.7601;SRR=68;TYPE=ins;ANN=TA…
chr5B	683761944	C	T	REF	ALT1	intergenic_region	MODIFIER	TRIDC5BG077490-TRIDC5BG077530	AB=0.227273;ABP=17.2236;AC=167;AF=0.802885;AN=208;AO=93;CIGAR=1X;DP=148;DPB=148;DPRA=0.526316;EPP=31.613;EPPR=14.4204;GTI=6;LEN=1;MEANALT=1;MQM=69.172;MQMR=70;NS=52;NUMALT=1;ODDS=0.363713;PAIRED=1;PAIREDR=1;PAO=0;PQA=0;PQR=0;PRO=0;QA=3539;QR=2086;RO=55;RPL=37;RPP=11.4393;RPPR=11.8936;RPR=56;RUN=1;SAF=67;SAP=42.2602;SAR=26;SRF=17;SRP=20.4216;SRR=38;TYPE=snp;ANN=T
chr5B	683761978	T	A	REF	ALT1	intergenic_region	MODIFIER	TRIDC5BG077490-TRIDC5BG077530	AB=0.666667;ABP=10.9724;AC=181;AF=0.79386;AN=228;AO=117;CIGAR=1X;DP=158;DPB=158;DPRA=0.8;EPP=25.7458;EPPR=3.06326;GTI=13;LEN=1;MEANALT=1;MQM=69.6752;MQMR=70;NS=57;NUMALT=1;ODDS=0.590772;PAIRED=1;PAIREDR=1;PAO=0;PQA=0;PQR=0;PRO=0;QA=4511;QR=1581;RO=41;RPL=46;RPP=14.61;RPPR=4.33437;RPR=71;RUN=1;SAF=98;SAP=118.841;SAR=19;SRF=18;SRP=4.33437;SRR=23;TYPE=snp;ANN=A
chr5B	683761984	G	C	REF	ALT1	intergenic_region	MODIFIER	TRIDC5BG077490-TRIDC5BG077530	AB=0.536585;ABP=3.48696;AC=182;AF=0.798246;AN=228;AO=122;CIGAR=1X;DP=162;DPB=162;DPRA=1.09621;EPP=7.56683;EPPR=3.87889;GTI=13;LEN=1;MEANALT=1;MQM=69.6885;MQMR=70;NS=57;NUMALT=1;ODDS=1.52408;PAIRED=1;PAIREDR=1;PAO=0;PQA=0;PQR=0;PRO=0;QA=4690;QR=1537;RO=40;RPL=56;RPP=4.7902;RPPR=4.96463;RPR=66;RUN=1;SAF=101;SAP=116.924;SAR=21;SRF=17;SRP=4.96463;SRR=23;TYPE=snp;ANN=C
chr5B	683782654	AGGGT	AGGGC	REF	ALT1	intergenic_region	MODIFIER	TRIDC5BG077490-TRIDC5BG077530	AB=0;ABP=0;AC=28;AF=0.583333;AN=48;AO=12;CIGAR=4M1X;DP=18;DPB=21.2;DPRA=1.42857;EPP=5.9056;EPPR=0;GTI=0;LEN=1;MEANALT=1;MQM=70;MQMR=0;NS=12;NUMALT=1;ODDS=43.3497;PAIRED=1;PAIREDR=0;PAO=0;PQA=0;PQR=0;PRO=0;QA=451;QR=0;RO=0;RPL=8;RPP=5.9056;RPPR=0;RPR=4;RUN=1;SAF=2;SAP=14.5915;SAR=10;SRF=0;SRP=0;SRR=0;TYPE=snp;ANN=AGGGC
chr5B	683782659	CG	CA	REF	ALT1	intergenic_region	MODIFIER	TRIDC5BG077490-TRIDC5BG077530	AB=0;ABP=0;AC=24;AF=0.5;AN=48;AO=11;CIGAR=1M1X;DP=18;DPB=18;DPRA=1.57143;EPP=7.94546;EPPR=10.7656;GTI=0;LEN=1;MEANALT=1;MQM=70;MQMR=70;NS=12;NUMALT=1;ODDS=28.7323;PAIRED=1;PAIREDR=1;PAO=0;PQA=0;PQR=0;PRO=0;QA=416;QR=272;RO=7;RPL=8;RPP=7.94546;RPPR=5.80219;RPR=3;RUN=1;SAF=2;SAP=12.6832;SAR=9;SRF=1;SRP=10.7656;SRR=6;TYPE=snp;ANN=CA
chr5B	683782690	A	G	REF	ALT1	intergenic_region	MODIFIER	TRIDC5BG077490-TRIDC5BG077530	AB=0;ABP=0;AC=28;AF=0.583333;AN=48;AO=11;CIGAR=1X;DP=17;DPB=17;DPRA=1.30952;EPP=4.78696;EPPR=8.80089;GTI=0;LEN=1;MEANALT=1;MQM=70;MQMR=70;NS=12;NUMALT=1;ODDS=40.1067;PAIRED=1;PAIREDR=1;PAO=0;PQA=0;PQR=0;PRO=0;QA=414;QR=225;RO=6;RPL=6;RPP=3.20771;RPPR=4.45795;RPR=5;RUN=1;SAF=3;SAP=7.94546;SAR=8;SRF=3;SRP=3.0103;SRR=3;TYPE=snp;ANN=G
chr5B	683782706	AT	GC	REF	ALT1	intergenic_region	MODIFIER	TRIDC5BG077490-TRIDC5BG077530	AB=0;ABP=0;AC=16;AF=0.5;AN=32;AO=6;CIGAR=2X;DP=10;DPB=10;DPRA=1.5;EPP=3.0103;EPPR=5.18177;GTI=0;LEN=2;MEANALT=1;MQM=70;MQMR=70;NS=8;NUMALT=1;ODDS=14.2628;PAIRED=1;PAIREDR=1;PAO=0;PQA=0;PQR=0;PRO=0;QA=221;QR=152;RO=4;RPL=3;RPP=3.0103;RPPR=3.0103;RPR=3;RUN=1;SAF=2;SAP=4.45795;SAR=4;SRF=3;SRP=5.18177;SRR=1;TYPE=mnp;ANN=GC
chr5B	683802986	T	G	REF	ALT1	intergenic_region	MODIFIER	TRIDC5BG077490-TRIDC5BG077530	AB=0;ABP=0;AC=28;AF=0.777778;AN=36;AO=8;CIGAR=1X;DP=12;DPB=12;DPRA=0.571429;EPP=3.0103;EPPR=3.0103;GTI=2;LEN=1;MEANALT=1;MQM=48.125;MQMR=70;NS=9;NUMALT=1;ODDS=3.48261;PAIRED=1;PAIREDR=1;PAO=0;PQA=0;PQR=0;PRO=0;QA=300;QR=155;RO=4;RPL=4;RPP=3.0103;RPPR=5.18177;RPR=4;RUN=1;SAF=4;SAP=3.0103;SAR=4;SRF=1;SRP=5.18177;SRR=3;TYPE=snp;ANN=G
chr5B	683882314	T	C	REF	ALT1	intergenic_region	MODIFIER	TRIDC5BG077490-TRIDC5BG077530	AB=0.6;ABP=3.87889;AC=69;AF=0.663462;AN=104;AO=26;CIGAR=1X;DP=49;DPB=49;DPRA=0.701754;EPP=6.01695;EPPR=3.86001;GTI=9;LEN=1;MEANALT=1;MQM=70;MQMR=70;NS=26;NUMALT=1;ODDS=2.46613;PAIRED=1;PAIREDR=1;PAO=0;PQA=0;PQR=0;PRO=0;QA=865;QR=843;RO=23;RPL=11;RPP=4.34659;RPPR=7.63648;RPR=15;RUN=1;SAF=15;SAP=4.34659;SAR=11;SRF=11;SRP=3.10471;SRR=12;TYPE=snp;ANN=C
chr5B	683885771	A	G	REF	ALT1	intergenic_region	MODIFIER	TRIDC5BG077490-TRIDC5BG077530	AB=0.397849;ABP=11.4393;AC=68;AF=0.485714;AN=140;AO=55;CIGAR=1X;DP=139;DPB=139;DPRA=2.34253;EPP=17.2631;EPPR=36.513;GTI=23;LEN=1;MEANALT=1;MQM=29.4;MQMR=26.9643;NS=35;NUMALT=1;ODDS=0.0669683;PAIRED=1;PAIREDR=1;PAO=0;PQA=0;PQR=0;PRO=0;QA=2012;QR=3089;RO=84;RPL=54;RPP=113.913;RPPR=89.9726;RPR=1;RUN=1;SAF=19;SAP=14.4204;SAR=36;SRF=37;SRP=5.59539;SRR=47;TYPE=snp;ANN=G
chr5B	683885809	G	A	ALT1	REF	intergenic_region	MODIFIER	TRIDC5BG077490-TRIDC5BG077530	AB=0;ABP=0;AC=60;AF=0.882353;AN=68;AO=53;CIGAR=1X;DP=55;DPB=55;DPRA=3.53333;EPP=53.2;EPPR=5.18177;GTI=1;LEN=1;MEANALT=1;MQM=29.7547;MQMR=3;NS=17;NUMALT=1;ODDS=9.59506;PAIRED=1;PAIREDR=1;PAO=0;PQA=0;PQR=0;PRO=0;QA=1872;QR=7;RO=1;RPL=7;RPP=65.3275;RPPR=5.18177;RPR=46;RUN=1;SAF=51;SAP=101.382;SAR=2;SRF=1;SRP=5.18177;SRR=0;TYPE=snp;ANN=A
chr5B	683885957	GC	AG	REF	ALT1	intergenic_region	MODIFIER	TRIDC5BG077490-TRIDC5BG077530	AB=0.257426;ABP=54.6311;AC=24;AF=0.162162;AN=148;AO=33;CIGAR=2X;DP=228;DPB=229;DPRA=7.25974;EPP=17.8158;EPPR=30.4205;GTI=19;LEN=2;MEANALT=1.18182;MQM=31.8485;MQMR=37.1886;NS=37;NUMALT=1;ODDS=0.257644;PAIRED=1;PAIREDR=1;PAO=0;PQA=0;PQR=64;PRO=2;QA=1213;QR=6270;RO=175;RPL=17;RPP=3.0761;RPPR=7.48974;RPR=16;RUN=1;SAF=21;SAP=8.34028;SAR=12;SRF=41;SRP=110.331;SRR=134;TYPE=mnp;ANN=AG
chr5B	683885987	G	A	REF	ALT1	intergenic_region	MODIFIER	TRIDC5BG077490-TRIDC5BG077530	AB=0.384615;ABP=13.5336;AC=44;AF=0.333333;AN=132;AO=44;CIGAR=1X;DP=185;DPB=185;DPRA=5.08008;EPP=12.6832;EPPR=4.87376;GTI=13;LEN=1;MEANALT=1;MQM=39.2955;MQMR=37.8865;NS=33;NUMALT=1;ODDS=0.0327295;PAIRED=1;PAIREDR=1;PAO=0;PQA=0;PQR=0;PRO=0;QA=1659;QR=5317;RO=141;RPL=35;RPP=36.372;RPPR=3.76493;RPR=9;RUN=1;SAF=38;SAP=53.5464;SAR=6;SRF=18;SRP=172.801;SRR=123;TYPE=snp;ANN=A
chr5B	683887223	G	A	ALT1	REF	intergenic_region	MODIFIER	TRIDC5BG077490-TRIDC5BG077530	AB=0.488636;ABP=3.20771;AC=33;AF=0.130952;AN=252;AO=122;CIGAR=1X;DP=594;DPB=594;DPRA=2.35864;EPP=15.0424;EPPR=15.4503;GTI=10;LEN=1;MEANALT=1;MQM=59.1475;MQMR=51.3538;NS=63;NUMALT=1;ODDS=0.0604398;PAIRED=1;PAIREDR=1;PAO=0;PQA=0;PQR=0;PRO=0;QA=4432;QR=17206;RO=472;RPL=60;RPP=3.0815;RPPR=50.8747;RPR=62;RUN=1;SAF=72;SAP=11.625;SAR=50;SRF=351;SRP=246.381;SRR=121;TYPE=snp;ANN=A
chr5B	683887305	G	A	ALT1	REF	intergenic_region	MODIFIER	TRIDC5BG077490-TRIDC5BG077530	AB=0.432653;ABP=12.6623;AC=31;AF=0.123016;AN=252;AO=135;CIGAR=1X;DP=863;DPB=863;DPRA=1.78921;EPP=3.15506;EPPR=9.33927;GTI=7;LEN=1;MEANALT=1.07692;MQM=56.5704;MQMR=52.3058;NS=63;NUMALT=1;ODDS=0.390234;PAIRED=1;PAIREDR=1;PAO=0;PQA=0;PQR=0;PRO=0;QA=5054;QR=26482;RO=726;RPL=61;RPP=5.72866;RPPR=81.5063;RPR=74;RUN=1;SAF=86;SAP=25.0306;SAR=49;SRF=450;SRP=93.5661;SRR=276;TYPE=snp;ANN=A
chr5B	683887377	C	T	REF	ALT1	intergenic_region	MODIFIER	TRIDC5BG077490-TRIDC5BG077530	AB=0.573643;ABP=15.1638;AC=216;AF=0.857143;AN=252;AO=872;CIGAR=1X;DP=1053;DPB=1053;DPRA=1.63196;EPP=3.6478;EPPR=3.98206;GTI=9;LEN=1;MEANALT=1;MQM=59.9484;MQMR=64.2376;NS=63;NUMALT=1;ODDS=0.324195;PAIRED=1;PAIREDR=1;PAO=0;PQA=0;PQR=0;PRO=0;QA=30694;QR=6627;RO=181;RPL=544;RPP=119.194;RPPR=6.47746;RPR=328;RUN=1;SAF=468;SAP=13.2102;SAR=404;SRF=79;SRP=9.35676;SRR=102;TYPE=snp;ANN=T
chr5B	683887423	TTG	CTA,CTG	ALT2	ALT1	intergenic_region	MODIFIER	TRIDC5BG077490-TRIDC5BG077530	AB=0.465347,0.546392;ABP=5.11727,6.63688;AC=215,36;AF=0.853175,0.142857;AN=252;AO=766,203;CIGAR=1X1M1X,1X2M;DP=974;DPB=975.333;DPRA=1.20209,1.90294;EPP=20.2573,13.29;EPPR=5.18177;GTI=10;LEN=3,1;MEANALT=1.18644,1.8;MQM=52.829,62.3596;MQMR=8;NS=63;NUMALT=2;ODDS=1058.49;PAIRED=1,1;PAIREDR=1;PAO=0,1.5;PQA=0,16;PQR=16;PRO=1.5;QA=27789,7414;QR=131;RO=4;RPL=324,76;RPP=42.4823,30.833;RPPR=11.6962;RPR=442…
chr5B	683887493	G	A	REF	ALT1	intergenic_region	MODIFIER	TRIDC5BG077490-TRIDC5BG077530	AB=0.560606;ABP=7.22164;AC=216;AF=0.857143;AN=252;AO=658;CIGAR=1X;DP=779;DPB=779;DPRA=1.30853;EPP=3.0103;EPPR=3.02825;GTI=9;LEN=1;MEANALT=1;MQM=52.1641;MQMR=68.9174;NS=63;NUMALT=1;ODDS=0.345439;PAIRED=1;PAIREDR=1;PAO=0;PQA=0;PQR=0;PRO=0;QA=23454;QR=4333;RO=121;RPL=410;RPP=89.6184;RPPR=49.688;RPR=248;RUN=1;SAF=245;SAP=96.1526;SAR=413;SRF=78;SRP=24.9942;SRR=43;TYPE=snp;ANN=A
chr5B	683887513	C	A	ALT1	REF	intergenic_region	MODIFIER	TRIDC5BG077490-TRIDC5BG077530	AB=0.426667;ABP=10.0169;AC=33;AF=0.130952;AN=252;AO=118;CIGAR=1X;DP=816;DPB=816;DPRA=1.61204;EPP=109.302;EPPR=3.62005;GTI=8;LEN=1;MEANALT=1;MQM=61.1949;MQMR=51.7908;NS=63;NUMALT=1;ODDS=0.148871;PAIRED=1;PAIREDR=1;PAO=0;PQA=0;PQR=0;PRO=0;QA=4118;QR=25216;RO=698;RPL=24;RPP=93.1816;RPPR=27.1018;RPR=94;RUN=1;SAF=43;SAP=21.8543;SAR=75;SRF=221;SRP=206.892;SRR=477;TYPE=snp;ANN=A
chr5B	683887526	C	T	REF	ALT1	intergenic_region	MODIFIER	TRIDC5BG077490-TRIDC5BG077530	AB=0.506329;ABP=3.06527;AC=211;AF=0.837302;AN=252;AO=544;CIGAR=1X;DP=698;DPB=698;DPRA=1.03833;EPP=3.40947;EPPR=122.357;GTI=13;LEN=1;MEANALT=1;MQM=50.443;MQMR=62.0519;NS=63;NUMALT=1;ODDS=0.111439;PAIRED=1;PAIREDR=1;PAO=0;PQA=0;PQR=0;PRO=0;QA=20197;QR=5628;RO=154;RPL=289;RPP=7.62468;RPPR=122.357;RPR=255;RUN=1;SAF=172;SAP=162.677;SAR=372;SRF=52;SRP=38.2615;SRR=102;TYPE=snp;ANN=T
chr5B	683887784	A	G	ALT1	REF	intergenic_region	MODIFIER	TRIDC5BG077490-TRIDC5BG077530	AB=0.522727;ABP=3.60252;AC=25;AF=0.104167;AN=240;AO=72;CIGAR=1X;DP=456;DPB=456;DPRA=2.40833;EPP=4.09604;EPPR=13.9581;GTI=8;LEN=1;MEANALT=1;MQM=42.1667;MQMR=39.9401;NS=60;NUMALT=1;ODDS=0.637841;PAIRED=1;PAIREDR=1;PAO=0;PQA=0;PQR=0;PRO=0;QA=2729;QR=14013;RO=384;RPL=46;RPP=15.074;RPPR=147.775;RPR=26;RUN=1;SAF=43;SAP=8.92153;SAR=29;SRF=134;SRP=79.1023;SRR=250;TYPE=snp;ANN=G
chr5B	683887913	CTG	TTA	ALT1	REF	intergenic_region	MODIFIER	TRIDC5BG077490-TRIDC5BG077530	AB=0.467742;ABP=4.13106;AC=32;AF=0.135593;AN=236;AO=100;CIGAR=1X1M1X;DP=529;DPB=533;DPRA=2.2605;EPP=13.5202;EPPR=17.2952;GTI=11;LEN=3;MEANALT=1.1;MQM=46.59;MQMR=34.9485;NS=59;NUMALT=1;ODDS=0.123216;PAIRED=1;PAIREDR=1;PAO=0;PQA=0;PQR=223;PRO=9;QA=3735;QR=15868;RO=427;RPL=63;RPP=17.6895;RPPR=27.222;RPR=37;RUN=1;SAF=56;SAP=6.13722;SAR=44;SRF=268;SRP=63.4301;SRR=159;TYPE=complex;ANN=TTA
chr5B	683887955	C	T	REF	ALT1	intergenic_region	MODIFIER	TRIDC5BG077490-TRIDC5BG077530	AB=0.484496;ABP=3.54896;AC=175;AF=0.741525;AN=236;AO=228;CIGAR=1X;DP=457;DPB=457;DPRA=0.788102;EPP=8.49612;EPPR=27.6741;GTI=16;LEN=1;MEANALT=1;MQM=27.693;MQMR=49.9345;NS=59;NUMALT=1;ODDS=0.119466;PAIRED=1;PAIREDR=1;PAO=0;PQA=0;PQR=0;PRO=0;QA=8696;QR=8583;RO=229;RPL=133;RPP=16.763;RPPR=36.0186;RPR=95;RUN=1;SAF=171;SAP=126.784;SAR=57;SRF=167;SRP=107.554;SRR=62;TYPE=snp;ANN=T
chr5B	683888025	T	G	REF	ALT1	intergenic_region	MODIFIER	TRIDC5BG077490-TRIDC5BG077530	AB=0.356557;ABP=46.6177;AC=209;AF=0.829365;AN=252;AO=412;CIGAR=1X;DP=722;DPB=722;DPRA=0.568955;EPP=3.09463;EPPR=22.8789;GTI=24;LEN=1;MEANALT=1.03636;MQM=31.2718;MQMR=65.8893;NS=63;NUMALT=1;ODDS=0.149332;PAIRED=1;PAIREDR=1;PAO=0;PQA=0;PQR=0;PRO=0;QA=15455;QR=11239;RO=307;RPL=214;RPP=4.35956;RPPR=5.56373;RPR=198;RUN=1;SAF=254;SAP=51.5838;SAR=158;SRF=189;SRP=38.6663;SRR=118;TYPE=snp;ANN=G
chr5B	683888084	GCA	ACG	REF	ALT1	intergenic_region	MODIFIER	TRIDC5BG077490-TRIDC5BG077530	AB=0.32987;ABP=99.8016;AC=154;AF=0.620968;AN=248;AO=198;CIGAR=1X1M1X;DP=658;DPB=665.667;DPRA=0.937958;EPP=22.3561;EPPR=35.4096;GTI=68;LEN=3;MEANALT=1.63043;MQM=27.1667;MQMR=57.0345;NS=62;NUMALT=1;ODDS=0.0154416;PAIRED=1;PAIREDR=1;PAO=0;PQA=0;PQR=244;PRO=10.5;QA=7027;QR=13816;RO=377;RPL=127;RPP=37.4029;RPPR=44.6254;RPR=71;RUN=1;SAF=51;SAP=104.082;SAR=147;SRF=218;SRP=23.0604;SRR=159;TYPE=complex;AN…
chr5B	683888132	CGGCG	TGGCG	REF	ALT1	intergenic_region	MODIFIER	TRIDC5BG077490-TRIDC5BG077530	AB=0.414798;ABP=59.2544;AC=116;AF=0.467742;AN=248;AO=385;CIGAR=1X4M;DP=1057;DPB=1095.2;DPRA=1.5583;EPP=15.4695;EPPR=28.9139;GTI=32;LEN=1;MEANALT=1.625;MQM=30.3143;MQMR=39.8855;NS=62;NUMALT=1;ODDS=0.0196762;PAIRED=1;PAIREDR=1;PAO=26;PQA=608.5;PQR=1249.5;PRO=47;QA=10657;QR=21677;RO=620;RPL=84;RPP=268.601;RPPR=21.1666;RPR=301;RUN=1;SAF=198;SAP=3.69276;SAR=187;SRF=383;SRP=77.6669;SRR=237;TYPE=snp;ANN…
chr5B	683888315	C	T	ALT1	REF	intergenic_region	MODIFIER	TRIDC5BG077490-TRIDC5BG077530	AB=0.371901;ABP=20.2565;AC=25;AF=0.104167;AN=240;AO=54;CIGAR=1X;DP=493;DPB=493;DPRA=1.79063;EPP=13.3047;EPPR=74.4012;GTI=6;LEN=1;MEANALT=1;MQM=42.5;MQMR=35.3927;NS=60;NUMALT=1;ODDS=1.24376;PAIRED=1;PAIREDR=1;PAO=0;PQA=0;PQR=0;PRO=0;QA=2061;QR=16354;RO=438;RPL=27;RPP=3.0103;RPPR=108.689;RPR=27;RUN=1;SAF=32;SAP=7.03155;SAR=22;SRF=99;SRP=288.574;SRR=339;TYPE=snp;ANN=T
chr5B	683888321	G	A	ALT1	REF	intergenic_region	MODIFIER	TRIDC5BG077490-TRIDC5BG077530	AB=0.408;ABP=12.2;AC=26;AF=0.108333;AN=240;AO=61;CIGAR=1X;DP=495;DPB=495;DPRA=1.875;EPP=7.31765;EPPR=48.2702;GTI=7;LEN=1;MEANALT=1;MQM=41.9508;MQMR=35.5266;NS=60;NUMALT=1;ODDS=0.869747;PAIRED=1;PAIREDR=1;PAO=0;PQA=0;PQR=0;PRO=0;QA=2327;QR=16347;RO=433;RPL=28;RPP=3.90025;RPPR=123.494;RPR=33;RUN=1;SAF=34;SAP=4.7546;SAR=27;SRF=98;SRP=284.695;SRR=335;TYPE=snp;ANN=A
chr5B	683888582	A	G	REF	ALT1	intergenic_region	MODIFIER	TRIDC5BG077490-TRIDC5BG077530	AB=0.214286;ABP=42.7172;AC=77;AF=0.620968;AN=124;AO=54;CIGAR=1X;DP=131;DPB=131;DPRA=1.41414;EPP=5.5839;EPPR=4.39215;GTI=7;LEN=1;MEANALT=1;MQM=33.3333;MQMR=55.6364;NS=31;NUMALT=1;ODDS=0.112116;PAIRED=1;PAIREDR=1;PAO=0;PQA=0;PQR=0;PRO=0;QA=1986;QR=2763;RO=77;RPL=24;RPP=4.45795;RPPR=4.39215;RPR=30;RUN=1;SAF=53;SAP=111.745;SAR=1;SRF=37;SRP=3.26411;SRR=40;TYPE=snp;ANN=G
chr5B	683888704	C	T	ALT1	REF	intergenic_region	MODIFIER	TRIDC5BG077490-TRIDC5BG077530	AB=0.591549;ABP=8.17902;AC=25;AF=0.152439;AN=164;AO=51;CIGAR=1X;DP=241;DPB=241;DPRA=2.04969;EPP=10.206;EPPR=9.59329;GTI=5;LEN=1;MEANALT=1;MQM=66.3137;MQMR=49.4789;NS=41;NUMALT=1;ODDS=1.3563;PAIRED=1;PAIREDR=1;PAO=0;PQA=0;PQR=0;PRO=0;QA=1816;QR=6688;RO=190;RPL=35;RPP=18.3809;RPPR=10.7362;RPR=16;RUN=1;SAF=19;SAP=10.206;SAR=32;SRF=61;SRP=55.8571;SRR=129;TYPE=snp;ANN=T
chr5B	683888720	G	A	REF	ALT1	intergenic_region	MODIFIER	TRIDC5BG077490-TRIDC5BG077530	AB=0.453333;ABP=4.429;AC=137;AF=0.835366;AN=164;AO=161;CIGAR=1X;DP=209;DPB=209;DPRA=3.11969;EPP=25.6826;EPPR=4.6389;GTI=7;LEN=1;MEANALT=1;MQM=50.7267;MQMR=69.0833;NS=41;NUMALT=1;ODDS=1.42183;PAIRED=1;PAIREDR=1;PAO=0;PQA=0;PQR=0;PRO=0;QA=5851;QR=1764;RO=48;RPL=93;RPP=11.4399;RPPR=14.5915;RPR=68;RUN=1;SAF=56;SAP=35.3936;SAR=105;SRF=23;SRP=3.19126;SRR=25;TYPE=snp;ANN=A
chr5B	683888746	C	G	REF	ALT1	intergenic_region	MODIFIER	TRIDC5BG077490-TRIDC5BG077530	AB=0.425926;ABP=5.5839;AC=106;AF=0.80303;AN=132;AO=111;CIGAR=1X;DP=152;DPB=152;DPRA=2.8373;EPP=13.359;EPPR=6.48466;GTI=8;LEN=1;MEANALT=1.03571;MQM=50.4595;MQMR=70;NS=33;NUMALT=1;ODDS=2.52613;PAIRED=1;PAIREDR=1;PAO=0;PQA=0;PQR=0;PRO=0;QA=4149;QR=1437;RO=40;RPL=84;RPP=66.5699;RPPR=6.48466;RPR=27;RUN=1;SAF=53;SAP=3.49937;SAR=58;SRF=20;SRP=3.0103;SRR=20;TYPE=snp;ANN=G
chr5B	683889316	G	A	REF	ALT1	intergenic_region	MODIFIER	TRIDC5BG077490-TRIDC5BG077530	AB=0.439655;ABP=6.67934;AC=214;AF=0.849206;AN=252;AO=408;CIGAR=1X;DP=528;DPB=528;DPRA=1.09722;EPP=3.2019;EPPR=31.9633;GTI=8;LEN=1;MEANALT=1;MQM=50.0368;MQMR=69.0917;NS=63;NUMALT=1;ODDS=0.0974602;PAIRED=1;PAIREDR=1;PAO=0;PQA=0;PQR=0;PRO=0;QA=15657;QR=4503;RO=120;RPL=280;RPP=125.975;RPPR=17.1973;RPR=128;RUN=1;SAF=153;SAP=58.3828;SAR=255;SRF=48;SRP=13.4334;SRR=72;TYPE=snp;ANN=A
chr5B	683895070	C	A	REF	ALT1	intergenic_region	MODIFIER	TRIDC5BG077490-TRIDC5BG077530	AB=0.163934;ABP=62.8504;AC=82;AF=0.66129;AN=124;AO=36;CIGAR=1X;DP=108;DPB=108;DPRA=1.53043;EPP=57.2971;EPPR=6.71098;GTI=7;LEN=1;MEANALT=1.04348;MQM=24.9444;MQMR=53.4507;NS=31;NUMALT=1;ODDS=141.386;PAIRED=1;PAIREDR=1;PAO=0;PQA=0;PQR=0;PRO=0;QA=1312;QR=2518;RO=71;RPL=3;RPP=57.2971;RPPR=44.88;RPR=33;RUN=1;SAF=36;SAP=81.1833;SAR=0;SRF=38;SRP=3.7749;SRR=33;TYPE=snp;ANN=A
chr5B	683895076	T	C	REF	ALT1	intergenic_region	MODIFIER	TRIDC5BG077490-TRIDC5BG077530	AB=0.180328;ABP=57.1547;AC=84;AF=0.7;AN=120;AO=38;CIGAR=1X;DP=105;DPB=105;DPRA=1.39063;EPP=61.5258;EPPR=16.1707;GTI=10;LEN=1;MEANALT=1.04167;MQM=24.4737;MQMR=53.6667;NS=30;NUMALT=1;ODDS=80.8299;PAIRED=1;PAIREDR=1;PAO=0;PQA=0;PQR=0;PRO=0;QA=1446;QR=2357;RO=66;RPL=3;RPP=61.5258;RPPR=45.6501;RPR=35;RUN=1;SAF=38;SAP=85.5263;SAR=0;SRF=34;SRP=3.1419;SRR=32;TYPE=snp;ANN=C
chr5B	683895114	CGCC	GGCT	REF	ALT1	intergenic_region	MODIFIER	TRIDC5BG077490-TRIDC5BG077530	AB=0.236842;ABP=25.8679;AC=75;AF=0.585938;AN=128;AO=31;CIGAR=1X2M1X;DP=122;DPB=122;DPRA=2.59239;EPP=54.0749;EPPR=11.0053;GTI=35;LEN=4;MEANALT=1.08696;MQM=23.4839;MQMR=49.3409;NS=32;NUMALT=1;ODDS=6.28777;PAIRED=1;PAIREDR=1;PAO=0;PQA=0;PQR=0;PRO=0;QA=1029;QR=3259;RO=88;RPL=29;RPP=54.0749;RPPR=6.56362;RPR=2;RUN=1;SAF=31;SAP=70.3259;SAR=0;SRF=59;SRP=25.2185;SRR=29;TYPE=complex;ANN=GGCT
chr5B	683909723	G	A	ALT1	REF	intergenic_region	MODIFIER	TRIDC5BG077490-TRIDC5BG077530	AB=0.27381;ABP=40.3389;AC=25;AF=0.102459;AN=244;AO=33;CIGAR=1X;DP=449;DPB=449;DPRA=1.52989;EPP=3.0761;EPPR=108.264;GTI=7;LEN=1;MEANALT=1;MQM=70;MQMR=64.1971;NS=61;NUMALT=1;ODDS=2.71656;PAIRED=1;PAIREDR=1;PAO=0;PQA=0;PQR=0;PRO=0;QA=1209;QR=14877;RO=416;RPL=20;RPP=6.23461;RPPR=6.01695;RPR=13;RUN=1;SAF=14;SAP=4.65535;SAR=19;SRF=199;SRP=4.70154;SRR=217;TYPE=snp;ANN=A
chr5B	683909725	C	T	REF	ALT1	intergenic_region	MODIFIER	TRIDC5BG077490-TRIDC5BG077530	AB=0.701923;ABP=39.8418;AC=210;AF=0.860656;AN=244;AO=382;CIGAR=1X;DP=428;DPB=428;DPRA=2.85027;EPP=96.1449;EPPR=4.70971;GTI=10;LEN=1;MEANALT=1;MQM=64.5236;MQMR=64.4565;NS=61;NUMALT=1;ODDS=0.94405;PAIRED=1;PAIREDR=1;PAO=0;PQA=0;PQR=0;PRO=0;QA=12487;QR=1645;RO=46;RPL=199;RPP=4.46553;RPPR=7.73089;RPR=183;RUN=1;SAF=174;SAP=9.58156;SAR=208;SRF=20;SRP=4.70971;SRR=26;TYPE=snp;ANN=T
chr5B	683909743	G	A	ALT1	REF	intergenic_region	MODIFIER	TRIDC5BG077490-TRIDC5BG077530	AB=0.293333;ABP=30.8341;AC=23;AF=0.0958333;AN=240;AO=31;CIGAR=1X;DP=425;DPB=425;DPRA=1.60117;EPP=4.76149;EPPR=40.0686;GTI=6;LEN=1;MEANALT=1;MQM=70;MQMR=65.5558;NS=60;NUMALT=1;ODDS=2.83638;PAIRED=1;PAIREDR=1;PAO=0;PQA=0;PQR=0;PRO=0;QA=1085;QR=14045;RO=394;RPL=19;RPP=6.44263;RPPR=6.18484;RPR=12;RUN=1;SAF=8;SAP=18.771;SAR=23;SRF=121;SRP=130.345;SRR=273;TYPE=snp;ANN=A
chr5B	683909785	C	T	ALT1	REF	intergenic_region	MODIFIER	TRIDC5BG077490-TRIDC5BG077530	AB=0.272727;ABP=37.5565;AC=23;AF=0.0974576;AN=236;AO=30;CIGAR=1X;DP=390;DPB=390;DPRA=1.80345;EPP=5.61607;EPPR=8.43898;GTI=7;LEN=1;MEANALT=1;MQM=70;MQMR=66.5694;NS=59;NUMALT=1;ODDS=2.78345;PAIRED=1;PAIREDR=1;PAO=0;PQA=0;PQR=0;PRO=0;QA=1076;QR=12801;RO=360;RPL=12;RPP=5.61607;RPPR=14.688;RPR=18;RUN=1;SAF=10;SAP=10.2485;SAR=20;SRF=75;SRP=269.016;SRR=285;TYPE=snp;ANN=T
chr5B	683909800	C	G	REF	ALT1	intergenic_region	MODIFIER	TRIDC5BG077490-TRIDC5BG077530	AB=0.684783;ABP=30.2953;AC=200;AF=0.847458;AN=236;AO=316;CIGAR=1X;DP=361;DPB=361;DPRA=2.61132;EPP=8.39775;EPPR=4.21667;GTI=10;LEN=1;MEANALT=1;MQM=68.0285;MQMR=62.8667;NS=59;NUMALT=1;ODDS=0.913998;PAIRED=1;PAIREDR=1;PAO=0;PQA=0;PQR=0;PRO=0;QA=11804;QR=1682;RO=45;RPL=182;RPP=18.8428;RPPR=4.21667;RPR=134;RUN=1;SAF=64;SAP=245.885;SAR=252;SRF=16;SRP=11.1654;SRR=29;TYPE=snp;ANN=G
chr5B	683909853	A	T	REF	ALT1	intergenic_region	MODIFIER	TRIDC5BG077490-TRIDC5BG077530	AB=0.628571;ABP=8.03571;AC=153;AF=0.85;AN=180;AO=174;CIGAR=1X;DP=202;DPB=202;DPRA=1.91795;EPP=15.7895;EPPR=4.25114;GTI=7;LEN=1;MEANALT=1;MQM=68.092;MQMR=70;NS=45;NUMALT=1;ODDS=2.75342;PAIRED=1;PAIREDR=1;PAO=0;PQA=0;PQR=0;PRO=0;QA=6405;QR=973;RO=28;RPL=126;RPP=78.937;RPPR=4.25114;RPR=48;RUN=1;SAF=33;SAP=148.574;SAR=141;SRF=10;SRP=7.97367;SRR=18;TYPE=snp;ANN=T
chr5B	683909860	C	T	REF	ALT1	intergenic_region	MODIFIER	TRIDC5BG077490-TRIDC5BG077530	AB=0.628571;ABP=8.03571;AC=161;AF=0.856383;AN=188;AO=169;CIGAR=1X;DP=197;DPB=197;DPRA=1.77561;EPP=9.80739;EPPR=4.25114;GTI=7;LEN=1;MEANALT=1;MQM=67.9408;MQMR=70;NS=47;NUMALT=1;ODDS=2.7117;PAIRED=1;PAIREDR=1;PAO=0;PQA=0;PQR=0;PRO=0;QA=6183;QR=984;RO=28;RPL=114;RPP=47.7375;RPPR=3.32051;RPR=55;RUN=1;SAF=30;SAP=155.669;SAR=139;SRF=11;SRP=5.80219;SRR=17;TYPE=snp;ANN=T
chr5B	683909885	G	A,C	ALT2	ALT1	intergenic_region	MODIFIER	TRIDC5BG077490-TRIDC5BG077530	AB=0.576923,0.45;ABP=4.34659,3.44459;AC=138,23;AF=0.821429,0.136905;AN=168;AO=102,20;CIGAR=1X,1X;DP=126;DPB=126;DPRA=1.44872,1.64205;EPP=3.7767,4.74748;EPPR=3.0103;GTI=11;LEN=1,1;MEANALT=1.05556,1.28571;MQM=66.9118,70;MQMR=51.5;NS=42;NUMALT=2;ODDS=2.75997;PAIRED=1,1;PAIREDR=1;PAO=0,0;PQA=0,0;PQR=0;PRO=0;QA=3546,752;QR=150;RO=4;RPL=57,11;RPP=6.07591,3.44459;RPPR=3.0103;RPR=45,9;RUN=1,1;SAF=7,5;SAP…
chr5B	683914904	ATT	AT	ALT1	REF	intergenic_region	MODIFIER	TRIDC5BG077490-TRIDC5BG077530	AB=0.617647;ABP=23.4477;AC=30;AF=0.120968;AN=248;AO=166;CIGAR=1M1D1M;DP=828;DPB=786.333;DPRA=2.27862;EPP=3.84749;EPPR=7.74687;GTI=4;LEN=1;MEANALT=1;MQM=66.5723;MQMR=66.4184;NS=62;NUMALT=1;ODDS=0.19977;PAIRED=1;PAIREDR=1;PAO=12.5;PQA=412;PQR=412;PRO=12.5;QA=6100;QR=24695;RO=662;RPL=64;RPP=21.8995;RPPR=47.1483;RPR=102;RUN=1;SAF=103;SAP=23.9402;SAR=63;SRF=467;SRP=245.69;SRR=195;TYPE=del;ANN=AT
chr5B	683915140	C	T	REF	ALT1	intergenic_region	MODIFIER	TRIDC5BG077490-TRIDC5BG077530	AB=0.473837;ABP=7.10075;AC=219;AF=0.855469;AN=256;AO=2710;CIGAR=1X;DP=3383;DPB=3383;DPRA=1.21125;EPP=549.705;EPPR=152.158;GTI=6;LEN=1;MEANALT=1;MQM=59.0768;MQMR=69.6672;NS=64;NUMALT=1;ODDS=0.293972;PAIRED=1;PAIREDR=1;PAO=0;PQA=0;PQR=0;PRO=0;QA=102251;QR=25333;RO=673;RPL=1685;RPP=352.048;RPPR=44.2102;RPR=1025;RUN=1;SAF=1149;SAP=139.023;SAR=1561;SRF=291;SRP=29.7294;SRR=382;TYPE=snp;ANN=T
chr5B	683915244	A	C	REF	ALT1	intergenic_region	MODIFIER	TRIDC5BG077490-TRIDC5BG077530	AB=0.588144;ABP=46.267;AC=219;AF=0.855469;AN=256;AO=2845;CIGAR=1X;DP=3529;DPB=3529;DPRA=1.31725;EPP=1152.12;EPPR=213.001;GTI=3;LEN=1;MEANALT=1.01667;MQM=48.7547;MQMR=69.631;NS=64;NUMALT=1;ODDS=0.0202866;PAIRED=1;PAIREDR=1;PAO=0;PQA=0;PQR=0;PRO=0;QA=102121;QR=24699;RO=683;RPL=1705;RPP=246.662;RPPR=77.4349;RPR=1140;RUN=1;SAF=1438;SAP=3.74379;SAR=1407;SRF=315;SRP=11.941;SRR=368;TYPE=snp;ANN=C
chr5B	683915271	AAAC	GAAA,GAAC	ALT2	ALT1	intergenic_region	MODIFIER	TRIDC5BG077490-TRIDC5BG077530	AB=0.566355,0.433645;ABP=23.4708,23.4708;AC=217,39;AF=0.847656,0.152344;AN=256;AO=2093,528;CIGAR=1X2M1X,1X3M;DP=2628;DPB=2634.5;DPRA=1.54067,1.9205;EPP=225.417,4.34279;EPPR=0;GTI=6;LEN=4,1;MEANALT=1.28333,1.71429;MQM=50.3359,69.3883;MQMR=0;NS=64;NUMALT=2;ODDS=0.313126;PAIRED=1,1;PAIREDR=0;PAO=0,7;PQA=0,128;PQR=128;PRO=7;QA=74203,19199;QR=0;RO=0;RPL=1148,341;RPP=45.7643,100.546;RPPR=0;RPR=945,187;…
chr5B	683915314	G	A	ALT1	REF	intergenic_region	MODIFIER	TRIDC5BG077490-TRIDC5BG077530	AB=0.497317;ABP=3.04526;AC=29;AF=0.113281;AN=256;AO=374;CIGAR=1X;DP=2606;DPB=2606;DPRA=1.98507;EPP=9.72212;EPPR=86.5687;GTI=7;LEN=1;MEANALT=1;MQM=69.9358;MQMR=60.3944;NS=64;NUMALT=1;ODDS=0.572303;PAIRED=1;PAIREDR=1;PAO=0;PQA=0;PQR=0;PRO=0;QA=13154;QR=80338;RO=2231;RPL=189;RPP=3.1032;RPPR=93.5532;RPR=185;RUN=1;SAF=81;SAP=263.959;SAR=293;SRF=378;SRP=2120.59;SRR=1853;TYPE=snp;ANN=A
chr5B	683915425	A	T	REF	ALT1	intergenic_region	MODIFIER	TRIDC5BG077490-TRIDC5BG077530	AB=0.478947;ABP=3.74174;AC=217;AF=0.861111;AN=252;AO=635;CIGAR=1X;DP=783;DPB=783;DPRA=1.87245;EPP=14.1207;EPPR=4.47751;GTI=14;LEN=1;MEANALT=1;MQM=69.9165;MQMR=70;NS=63;NUMALT=1;ODDS=0.111154;PAIRED=1;PAIREDR=1;PAO=0;PQA=0;PQR=0;PRO=0;QA=23409;QR=5485;RO=148;RPL=386;RPP=67.1936;RPPR=22.0254;RPR=249;RUN=1;SAF=251;SAP=63.5003;SAR=384;SRF=53;SRP=28.8919;SRR=95;TYPE=snp;ANN=T
chr5B	683915534	A	C	REF	ALT1	intergenic_region	MODIFIER	TRIDC5BG077490-TRIDC5BG077530	AB=0.487179;ABP=3.17734;AC=154;AF=0.802083;AN=192;AO=267;CIGAR=1X;DP=359;DPB=359;DPRA=2.04375;EPP=3.99438;EPPR=10.6577;GTI=10;LEN=1;MEANALT=1;MQM=63.7903;MQMR=70;NS=48;NUMALT=1;ODDS=3.41602;PAIRED=1;PAIREDR=1;PAO=0;PQA=0;PQR=0;PRO=0;QA=9757;QR=3314;RO=92;RPL=162;RPP=29.4339;RPPR=3.10471;RPR=105;RUN=1;SAF=31;SAP=344.794;SAR=236;SRF=34;SRP=16.6056;SRR=58;TYPE=snp;ANN=C
chr5B	683926419	T	C	REF	ALT1	intergenic_region	MODIFIER	TRIDC5BG077490-TRIDC5BG077530	AB=0.333333;ABP=7.35324;AC=193;AF=0.861607;AN=224;AO=165;CIGAR=1X;DP=192;DPB=192;DPRA=1.15686;EPP=5.9714;EPPR=3.09072;GTI=19;LEN=1;MEANALT=1;MQM=44.8909;MQMR=70;NS=56;NUMALT=1;ODDS=3.03562;PAIRED=1;PAIREDR=1;PAO=0;PQA=0;PQR=0;PRO=0;QA=5915;QR=969;RO=27;RPL=57;RPP=37.2406;RPPR=9.52472;RPR=108;RUN=1;SAF=145;SAP=208.642;SAR=20;SRF=20;SRP=16.6021;SRR=7;TYPE=snp;ANN=C
chr5B	683927022	C	T	REF	ALT1	intergenic_region	MODIFIER	TRIDC5BG077490-TRIDC5BG077530	AB=0.452381;ABP=3.83753;AC=218;AF=0.865079;AN=252;AO=388;CIGAR=1X;DP=443;DPB=443;DPRA=1.35197;EPP=103.502;EPPR=20.4216;GTI=9;LEN=1;MEANALT=1;MQM=70;MQMR=70;NS=63;NUMALT=1;ODDS=0.989947;PAIRED=1;PAIREDR=1;PAO=0;PQA=0;PQR=0;PRO=0;QA=13902;QR=2019;RO=55;RPL=81;RPP=288.861;RPPR=57.0602;RPR=307;RUN=1;SAF=288;SAP=200.816;SAR=100;SRF=45;SRP=51.3749;SRR=10;TYPE=snp;ANN=T
chr5B	683927083	A	C	REF	ALT1	intergenic_region	MODIFIER	TRIDC5BG077490-TRIDC5BG077530	AB=0.5;ABP=3.0103;AC=217;AF=0.875;AN=248;AO=452;CIGAR=1X;DP=526;DPB=526;DPRA=1.20349;EPP=191.352;EPPR=12.5178;GTI=9;LEN=1;MEANALT=1;MQM=69.9757;MQMR=70;NS=62;NUMALT=1;ODDS=0.0408759;PAIRED=1;PAIREDR=1;PAO=0;PQA=0;PQR=0;PRO=0;QA=15014;QR=2411;RO=74;RPL=301;RPP=111.104;RPPR=8.76177;RPR=151;RUN=1;SAF=292;SAP=86.7177;SAR=160;SRF=58;SRP=54.7735;SRR=16;TYPE=snp;ANN=C
chr5B	683927123	CTTCTGTCA	GTCCTCTCG	REF	ALT1	intergenic_region	MODIFIER	TRIDC5BG077490-TRIDC5BG077530	AB=0.479167;ABP=3.19126;AC=220;AF=0.859375;AN=256;AO=341;CIGAR=1X1M1X2M1X2M1X;DP=422;DPB=428.333;DPRA=0.873819;EPP=55.7433;EPPR=5.29458;GTI=14;LEN=9;MEANALT=1.07018;MQM=69.9677;MQMR=70;NS=64;NUMALT=1;ODDS=0.2301;PAIRED=1;PAIREDR=1;PAO=0;PQA=0;PQR=386;PRO=14;QA=12068;QR=2776;RO=77;RPL=152;RPP=11.728;RPPR=17.9286;RPR=189;RUN=1;SAF=184;SAP=7.65254;SAR=157;SRF=48;SRP=13.1908;SRR=29;TYPE=complex;ANN=G…
chr5B	683927176	C	G	REF	ALT1	intergenic_region	MODIFIER	TRIDC5BG077490-TRIDC5BG077530	AB=0.329787;ABP=26.6655;AC=222;AF=0.867188;AN=256;AO=554;CIGAR=1X;DP=698;DPB=698;DPRA=0.799138;EPP=9.2817;EPPR=4.8477;GTI=5;LEN=1;MEANALT=1.01724;MQM=70;MQMR=70;NS=64;NUMALT=1;ODDS=0.756878;PAIRED=1;PAIREDR=1;PAO=0;PQA=0;PQR=0;PRO=0;QA=20519;QR=5375;RO=143;RPL=200;RPP=95.9681;RPPR=21.6121;RPR=354;RUN=1;SAF=357;SAP=103.353;SAR=197;SRF=91;SRP=26.1069;SRR=52;TYPE=snp;ANN=G
chr5B	683927193	TATTACTGG	AATTGCTGC	REF	ALT1	intergenic_region	MODIFIER	TRIDC5BG077490-TRIDC5BG077530	AB=0.39;ABP=13.5202;AC=220;AF=0.859375;AN=256;AO=579;CIGAR=1X3M1X3M1X;DP=724;DPB=732.889;DPRA=0.973115;EPP=5.74433;EPPR=5.61299;GTI=12;LEN=9;MEANALT=1.0678;MQM=70;MQMR=70;NS=64;NUMALT=1;ODDS=0.0387373;PAIRED=1;PAIREDR=1;PAO=1;PQA=10;PQR=541;PRO=16;QA=21070;QR=5199;RO=141;RPL=216;RPP=84.0524;RPPR=4.87376;RPR=363;RUN=1;SAF=369;SAP=97.8238;SAR=210;SRF=81;SRP=9.80193;SRR=60;TYPE=complex;ANN=AATTGCTGC
chr5B	683927207	T	C	ALT1	REF	intergenic_region	MODIFIER	TRIDC5BG077490-TRIDC5BG077530	AB=0.575472;ABP=8.25461;AC=32;AF=0.125;AN=256;AO=134;CIGAR=1X;DP=809;DPB=809;DPRA=1.55637;EPP=17.5948;EPPR=4.05726;GTI=9;LEN=1;MEANALT=1.2;MQM=70;MQMR=70;NS=64;NUMALT=1;ODDS=0.0112378;PAIRED=1;PAIREDR=1;PAO=0;PQA=0;PQR=0;PRO=0;QA=4888;QR=24532;RO=672;RPL=72;RPP=4.6308;RPPR=17.9521;RPR=62;RUN=1;SAF=74;SAP=6.18648;SAR=60;SRF=415;SRP=83.6779;SRR=257;TYPE=snp;ANN=C
chr5B	683927208	A	G	REF	ALT1	intergenic_region	MODIFIER	TRIDC5BG077490-TRIDC5BG077530	AB=0.390909;ABP=14.3809;AC=220;AF=0.859375;AN=256;AO=636;CIGAR=1X;DP=791;DPB=791;DPRA=1.01417;EPP=3.22881;EPPR=18.2666;GTI=12;LEN=1;MEANALT=1;MQM=70;MQMR=70;NS=64;NUMALT=1;ODDS=0.340538;PAIRED=1;PAIREDR=1;PAO=0;PQA=0;PQR=0;PRO=0;QA=23196;QR=5666;RO=155;RPL=278;RPP=24.8616;RPPR=3.02431;RPR=358;RUN=1;SAF=390;SAP=73.8085;SAR=246;SRF=83;SRP=4.70545;SRR=72;TYPE=snp;ANN=G
chr5B	683927301	A	G	REF	ALT1	intergenic_region	MODIFIER	TRIDC5BG077490-TRIDC5BG077530	AB=0.367347;ABP=17.989;AC=221;AF=0.863281;AN=256;AO=555;CIGAR=1X;DP=659;DPB=659;DPRA=1.24496;EPP=94.5995;EPPR=39.8418;GTI=8;LEN=1;MEANALT=1;MQM=69.9532;MQMR=70;NS=64;NUMALT=1;ODDS=0.649773;PAIRED=1;PAIREDR=1;PAO=0;PQA=0;PQR=0;PRO=0;QA=20574;QR=3711;RO=104;RPL=293;RPP=6.77027;RPPR=19.3799;RPR=262;RUN=1;SAF=227;SAP=42.9224;SAR=328;SRF=29;SRP=47.1914;SRR=75;TYPE=snp;ANN=G
chr5B	683927320	C	G	REF	ALT1	intergenic_region	MODIFIER	TRIDC5BG077490-TRIDC5BG077530	AB=0.357143;ABP=20.3821;AC=223;AF=0.871094;AN=256;AO=580;CIGAR=1X;DP=679;DPB=679;DPRA=1.19074;EPP=89.5098;EPPR=47.4268;GTI=5;LEN=1;MEANALT=1;MQM=69.9552;MQMR=70;NS=64;NUMALT=1;ODDS=14.1572;PAIRED=1;PAIREDR=1;PAO=0;PQA=0;PQR=0;PRO=0;QA=21683;QR=3722;RO=99;RPL=276;RPP=5.94553;RPPR=6.71716;RPR=304;RUN=1;SAF=286;SAP=3.24991;SAR=294;SRF=36;SRP=19.0002;SRR=63;TYPE=snp;ANN=G
chr5B	683927448	G	A	REF	ALT1	intergenic_region	MODIFIER	TRIDC5BG077490-TRIDC5BG077530	AB=0.52973;ABP=4.43056;AC=220;AF=0.859375;AN=256;AO=1059;CIGAR=1X;DP=1207;DPB=1207;DPRA=1.62006;EPP=9.21304;EPPR=9.52472;GTI=10;LEN=1;MEANALT=1.01695;MQM=69.9887;MQMR=70;NS=64;NUMALT=1;ODDS=0.0574017;PAIRED=1;PAIREDR=1;PAO=0;PQA=0;PQR=0;PRO=0;QA=37718;QR=5196;RO=147;RPL=328;RPP=336.029;RPPR=41.4321;RPR=731;RUN=1;SAF=606;SAP=51.0103;SAR=453;SRF=87;SRP=13.779;SRR=60;TYPE=snp;ANN=A
chr5B	683927528	G	C	REF	ALT1	intergenic_region	MODIFIER	TRIDC5BG077490-TRIDC5BG077530	AB=0.561151;ABP=7.52509;AC=217;AF=0.847656;AN=256;AO=805;CIGAR=1X;DP=937;DPB=937;DPRA=1.28128;EPP=231.436;EPPR=16.9508;GTI=9;LEN=1;MEANALT=1.01724;MQM=70;MQMR=70;NS=64;NUMALT=1;ODDS=0.170421;PAIRED=1;PAIREDR=1;PAO=0;PQA=0;PQR=0;PRO=0;QA=28303;QR=4712;RO=131;RPL=510;RPP=127.701;RPPR=25.703;RPR=295;RUN=1;SAF=271;SAP=189.592;SAR=534;SRF=39;SRP=49.5726;SRR=92;TYPE=snp;ANN=C
chr5B	683927554	TA	CG,TG	ALT2	ALT1	intergenic_region	MODIFIER	TRIDC5BG077490-TRIDC5BG077530	AB=0.465753,0.534247;ABP=3.75395,3.75395;AC=221,35;AF=0.863281,0.136719;AN=256;AO=605,80;CIGAR=2X,1M1X;DP=687;DPB=692.5;DPRA=1.62994,0.958591;EPP=7.92393,11.8048;EPPR=0;GTI=9;LEN=2,1;MEANALT=1.12069,1.45455;MQM=70,70;MQMR=0;NS=64;NUMALT=2;ODDS=6.67254;PAIRED=1,1;PAIREDR=0;PAO=0,5.5;PQA=0,183.5;PQR=183.5;PRO=5.5;QA=21326,2983;QR=0;RO=0;RPL=353,56;RPP=39.6238,30.8051;RPPR=0;RPR=252,24;RUN=1,1;SAF=6…
chr5B	683927568	A	T	REF	ALT1	intergenic_region	MODIFIER	TRIDC5BG077490-TRIDC5BG077530	AB=0.532468;ABP=3.71532;AC=221;AF=0.863281;AN=256;AO=571;CIGAR=1X;DP=651;DPB=651;DPRA=1.42712;EPP=7.15169;EPPR=8.33041;GTI=9;LEN=1;MEANALT=1;MQM=70;MQMR=70;NS=64;NUMALT=1;ODDS=1.51831;PAIRED=1;PAIREDR=1;PAO=0;PQA=0;PQR=0;PRO=0;QA=20629;QR=2931;RO=80;RPL=331;RPP=34.5024;RPPR=16.1477;RPR=240;RUN=1;SAF=29;SAP=1003.82;SAR=542;SRF=10;SRP=100.727;SRR=70;TYPE=snp;ANN=T
chr5B	683927576	C	A	ALT1	REF	intergenic_region	MODIFIER	TRIDC5BG077490-TRIDC5BG077530	AB=0.363636;ABP=13.6703;AC=32;AF=0.125;AN=256;AO=62;CIGAR=1X;DP=661;DPB=661;DPRA=0.899625;EPP=11.9764;EPPR=73.0521;GTI=9;LEN=1;MEANALT=1;MQM=70;MQMR=70;NS=64;NUMALT=1;ODDS=1.62001;PAIRED=1;PAIREDR=1;PAO=0;PQA=0;PQR=0;PRO=0;QA=2294;QR=21259;RO=599;RPL=37;RPP=8.05372;RPPR=109.014;RPR=25;RUN=1;SAF=4;SAP=105.14;SAR=58;SRF=18;SRP=1152.07;SRR=581;TYPE=snp;ANN=A
chr5B	683972666	A	G	REF	ALT1	intergenic_region	MODIFIER	TRIDC5BG077490-TRIDC5BG077530	AB=0;ABP=0;AC=20;AF=0.714286;AN=28;AO=6;CIGAR=1X;DP=9;DPB=9;DPRA=0.8;EPP=3.0103;EPPR=3.73412;GTI=2;LEN=1;MEANALT=1;MQM=70;MQMR=70;NS=7;NUMALT=1;ODDS=0.223938;PAIRED=1;PAIREDR=1;PAO=0;PQA=0;PQR=0;PRO=0;QA=232;QR=108;RO=3;RPL=2;RPP=4.45795;RPPR=3.73412;RPR=4;RUN=1;SAF=5;SAP=8.80089;SAR=1;SRF=2;SRP=3.73412;SRR=1;TYPE=snp;ANN=G
chr5B	684072339	G	A	ALT1	REF	intergenic_region	MODIFIER	TRIDC5BG077490-TRIDC5BG077530	AB=0.785714;ABP=12.937;AC=17;AF=0.141667;AN=120;AO=17;CIGAR=1X;DP=96;DPB=96;DPRA=1.31579;EPP=3.13803;EPPR=4.35716;GTI=11;LEN=1;MEANALT=1;MQM=65.6471;MQMR=56.3165;NS=30;NUMALT=1;ODDS=2.67076;PAIRED=1;PAIREDR=1;PAO=0;PQA=0;PQR=0;PRO=0;QA=638;QR=2936;RO=79;RPL=9;RPP=3.13803;RPPR=7.6556;RPR=8;RUN=1;SAF=6;SAP=6.20364;SAR=11;SRF=35;SRP=5.23675;SRR=44;TYPE=snp;ANN=A
chr5B	684072385	C	T	REF	ALT1	intergenic_region	MODIFIER	TRIDC5BG077490-TRIDC5BG077530	AB=0.5;ABP=3.0103;AC=84;AF=0.807692;AN=104;AO=52;CIGAR=1X;DP=68;DPB=68;DPRA=1.19192;EPP=11.1951;EPPR=3.55317;GTI=7;LEN=1;MEANALT=1;MQM=55.7308;MQMR=59.375;NS=26;NUMALT=1;ODDS=0.295142;PAIRED=1;PAIREDR=1;PAO=0;PQA=0;PQR=0;PRO=0;QA=1855;QR=588;RO=16;RPL=30;RPP=5.68288;RPPR=3.55317;RPR=22;RUN=1;SAF=21;SAP=7.18621;SAR=31;SRF=6;SRP=5.18177;SRR=10;TYPE=snp;ANN=T
chr5B	684110111	G	A	ALT1	REF	intergenic_region	MODIFIER	TRIDC5BG077490-TRIDC5BG077530	AB=0.423423;ABP=8.66395;AC=32;AF=0.135593;AN=236;AO=114;CIGAR=1X;DP=514;DPB=514;DPRA=2.59583;EPP=3.08649;EPPR=14.4974;GTI=8;LEN=1;MEANALT=1;MQM=70;MQMR=68.0675;NS=59;NUMALT=1;ODDS=0.0195361;PAIRED=1;PAIREDR=1;PAO=0;PQA=0;PQR=0;PRO=0;QA=4327;QR=15205;RO=400;RPL=60;RPP=3.69603;RPPR=34.3664;RPR=54;RUN=1;SAF=14;SAP=143.889;SAR=100;SRF=47;SRP=511.33;SRR=353;TYPE=snp;ANN=A
chr5B	684110633	ATCA	TTTG,TTCG	ALT2	ALT1	intergenic_region	MODIFIER	TRIDC5BG077490-TRIDC5BG077530	AB=0.65,0.340909;ABP=46.0055,51.3749;AC=200,28;AF=0.877193,0.122807;AN=228;AO=554,97;CIGAR=1X1M2X,1X2M1X;DP=653;DPB=653;DPRA=2.75787,2.7674;EPP=14.4399,6.79359;EPPR=0;GTI=8;LEN=4,4;MEANALT=1.13462,1.7;MQM=57.778,57.4433;MQMR=0;NS=57;NUMALT=2;ODDS=0.127536;PAIRED=1,1;PAIREDR=0;PAO=0,0;PQA=0,0;PQR=0;PRO=0;QA=19830,3533;QR=0;RO=0;RPL=185,42;RPP=135.713,6.79359;RPPR=0;RPR=369,55;RUN=1,1;SAF=395,81;SA…
chr5B	684110655	C	G	ALT1	REF	intergenic_region	MODIFIER	TRIDC5BG077490-TRIDC5BG077530	AB=0.384236;ABP=26.6398;AC=27;AF=0.114407;AN=236;AO=109;CIGAR=1X;DP=872;DPB=872;DPRA=2.4669;EPP=19.7645;EPPR=57.9972;GTI=9;LEN=1;MEANALT=1;MQM=59.367;MQMR=60.8178;NS=59;NUMALT=1;ODDS=0.030892;PAIRED=1;PAIREDR=1;PAO=0;PQA=0;PQR=0;PRO=0;QA=3834;QR=26830;RO=763;RPL=67;RPP=15.4614;RPPR=6.90643;RPR=42;RUN=1;SAF=79;SAP=50.8425;SAR=30;SRF=461;SRP=74.9592;SRR=302;TYPE=snp;ANN=G
chr5B	684110680	G	A	ALT1	REF	intergenic_region	MODIFIER	TRIDC5BG077490-TRIDC5BG077530	AB=0.375;ABP=38.8396;AC=25;AF=0.104167;AN=240;AO=136;CIGAR=1X;DP=1094;DPB=1094;DPRA=4.72299;EPP=42.9271;EPPR=46.8504;GTI=10;LEN=1;MEANALT=1;MQM=63.9191;MQMR=64.1223;NS=60;NUMALT=1;ODDS=0.000656707;PAIRED=1;PAIREDR=1;PAO=0;PQA=0;PQR=0;PRO=0;QA=4739;QR=34301;RO=957;RPL=56;RPP=12.2071;RPPR=58.9399;RPR=80;RUN=1;SAF=83;SAP=17.3803;SAR=53;SRF=505;SRP=9.38404;SRR=452;TYPE=snp;ANN=A
chr5B	684110816	C	T	ALT1	REF	intergenic_region	MODIFIER	TRIDC5BG077490-TRIDC5BG077530	AB=0.434343;ABP=10.424;AC=26;AF=0.103175;AN=252;AO=102;CIGAR=1X;DP=798;DPB=798;DPRA=2.21269;EPP=7.18293;EPPR=7.76254;GTI=10;LEN=1;MEANALT=1;MQM=69.4216;MQMR=66.1698;NS=63;NUMALT=1;ODDS=0.00341378;PAIRED=1;PAIREDR=1;PAO=0;PQA=0;PQR=0;PRO=0;QA=3816;QR=25561;RO=695;RPL=48;RPP=3.7767;RPPR=26.659;RPR=54;RUN=1;SAF=38;SAP=17.4016;SAR=64;SRF=225;SRP=190.554;SRR=470;TYPE=snp;ANN=T
chr5B	684110824	TTTCA	ATTCC	ALT1	REF	intergenic_region	MODIFIER	TRIDC5BG077490-TRIDC5BG077530	AB=0.458564;ABP=5.70964;AC=30;AF=0.119048;AN=252;AO=97;CIGAR=1X3M1X;DP=722;DPB=741.2;DPRA=2.22011;EPP=3.03269;EPPR=3.0103;GTI=21;LEN=5;MEANALT=1.22222;MQM=69.2165;MQMR=67.8946;NS=63;NUMALT=1;ODDS=0.0327556;PAIRED=1;PAIREDR=1;PAO=0;PQA=0;PQR=804.5;PRO=28.5;QA=3580;QR=22173;RO=598;RPL=45;RPP=4.10723;RPPR=21.8346;RPR=52;RUN=1;SAF=31;SAP=30.4335;SAR=66;SRF=158;SRP=291.78;SRR=440;TYPE=complex;ANN=ATTCC
chr5B	684110880	CTATTTA	ATGTTTG,CTATTTT,CTGTTTA	ALT3	ALT1	intergenic_region	MODIFIER	TRIDC5BG077490-TRIDC5BG077530	AB=0.465116,0.139241,0.574257;ABP=4.37378,92.3155,7.84774;AC=168,28,28;AF=0.75,0.125,0.125;AN=224;AO=254,19,82;CIGAR=1X1M1X3M1X,6M1X,2M1X4M;DP=358;DPB=362.286;DPRA=2.29313,1.30634,2.711;EPP=38.0274,16.8392,8.20065;EPPR=0;GTI=10;LEN=7,1,1;MEANALT=1.32609,1.73333,1.66667;MQM=65.7638,22.1579,61.7317;MQMR=0;NS=56;NUMALT=3;ODDS=113.63;PAIRED=1,1,1;PAIREDR=0;PAO=0,2.25,3.58333;PQA=0,76.5,120.5;PQR=120.…
chr5B	684110915	C	T	REF	ALT1	intergenic_region	MODIFIER	TRIDC5BG077490-TRIDC5BG077530	AB=0.503356;ABP=3.02487;AC=128;AF=0.603774;AN=212;AO=211;CIGAR=1X;DP=358;DPB=358;DPRA=1.465;EPP=5.32585;EPPR=19.0969;GTI=28;LEN=1;MEANALT=1;MQM=62.3649;MQMR=42.6259;NS=53;NUMALT=1;ODDS=0.0223152;PAIRED=1;PAIREDR=1;PAO=0;PQA=0;PQR=0;PRO=0;QA=8026;QR=5475;RO=147;RPL=98;RPP=5.32585;RPPR=30.3236;RPR=113;RUN=1;SAF=0;SAP=461.191;SAR=211;SRF=63;SRP=9.52472;SRR=84;TYPE=snp;ANN=T
chr5B	684111300	CTGAT	TTGAT,TTGAG	ALT2	ALT1	intergenic_region	MODIFIER	TRIDC5BG077490-TRIDC5BG077530	AB=0.61194,0.38806;ABP=10.3026,10.3026;AC=176,32;AF=0.846154,0.153846;AN=208;AO=248,42;CIGAR=1X4M,1X3M1X;DP=291;DPB=294.4;DPRA=3.3265,3.28058;EPP=9.87495,8.18047;EPPR=0;GTI=9;LEN=1,5;MEANALT=1.15556,1.46154;MQM=69.6089,62.381;MQMR=0;NS=52;NUMALT=2;ODDS=0.502396;PAIRED=1,1;PAIREDR=0;PAO=3.5,0;PQA=81.5,0;PQR=81.5;PRO=3.5;QA=9471,1513;QR=0;RO=0;RPL=147,28;RPP=21.5379,13.1438;RPPR=0;RPR=101,14;RUN=1,…
chr5B	684111428	G	C	ALT1	REF	intergenic_region	MODIFIER	TRIDC5BG077490-TRIDC5BG077530	AB=0.488372;ABP=3.0608;AC=22;AF=0.114583;AN=192;AO=26;CIGAR=1X;DP=240;DPB=240;DPRA=2.89474;EPP=11.3621;EPPR=7.06913;GTI=12;LEN=1;MEANALT=1;MQM=67.3462;MQMR=63.9579;NS=48;NUMALT=1;ODDS=0.576903;PAIRED=1;PAIREDR=1;PAO=0;PQA=0;PQR=0;PRO=0;QA=921;QR=7962;RO=214;RPL=10;RPP=6.01695;RPPR=34.8315;RPR=16;RUN=1;SAF=4;SAP=30.0702;SAR=22;SRF=68;SRP=64.7451;SRR=146;TYPE=snp;ANN=C
chr5B	684111485	CCTC	ACTT	REF	ALT1	intergenic_region	MODIFIER	TRIDC5BG077490-TRIDC5BG077530	AB=0;ABP=0;AC=108;AF=0.870968;AN=124;AO=90;CIGAR=1X2M1X;DP=104;DPB=107.75;DPRA=3.14103;EPP=3.87889;EPPR=0;GTI=6;LEN=4;MEANALT=1.11538;MQM=69.4556;MQMR=0;NS=31;NUMALT=1;ODDS=2.11889;PAIRED=1;PAIREDR=0;PAO=0;PQA=0;PQR=101.5;PRO=3;QA=3316;QR=0;RO=0;RPL=55;RPP=12.6613;RPPR=0;RPR=35;RUN=1;SAF=7;SAP=142.371;SAR=83;SRF=0;SRP=0;SRR=0;TYPE=complex;ANN=ACTT
chr5B	684120659	A	C	REF	ALT1	intergenic_region	MODIFIER	TRIDC5BG077490-TRIDC5BG077530	AB=0.5;ABP=3.0103;AC=10;AF=0.05;AN=200;AO=6;CIGAR=1X;DP=189;DPB=189;DPRA=0.692449;EPP=8.80089;EPPR=59.5042;GTI=2;LEN=1;MEANALT=1;MQM=20.1667;MQMR=70;NS=50;NUMALT=1;ODDS=7.20301;PAIRED=1;PAIREDR=1;PAO=0;PQA=0;PQR=0;PRO=0;QA=207;QR=6434;RO=183;RPL=4;RPP=4.45795;RPPR=3.11709;RPR=2;RUN=1;SAF=3;SAP=3.0103;SAR=3;SRF=69;SRP=27.0389;SRR=114;TYPE=snp;ANN=C
chr5B	684120666	AA	GG	REF	ALT1	intergenic_region	MODIFIER	TRIDC5BG077490-TRIDC5BG077530	AB=0;ABP=0;AC=12;AF=0.0625;AN=192;AO=4;CIGAR=2X;DP=172;DPB=172.5;DPRA=0.357143;EPP=5.18177;EPPR=46.4914;GTI=2;LEN=2;MEANALT=1;MQM=19;MQMR=70;NS=48;NUMALT=1;ODDS=7.38685;PAIRED=1;PAIREDR=1;PAO=0;PQA=0;PQR=0;PRO=1;QA=148;QR=6067;RO=168;RPL=4;RPP=11.6962;RPPR=7.19814;RPR=0;RUN=1;SAF=1;SAP=5.18177;SAR=3;SRF=52;SRP=55.9529;SRR=116;TYPE=mnp;ANN=GG
chr5B	684120681	G	A	ALT1	REF	intergenic_region	MODIFIER	TRIDC5BG077490-TRIDC5BG077530	AB=0.37931;ABP=6.67934;AC=23;AF=0.112745;AN=204;AO=26;CIGAR=1X;DP=184;DPB=184;DPRA=1.97551;EPP=6.01695;EPPR=17.0836;GTI=6;LEN=1;MEANALT=1;MQM=70;MQMR=68.7089;NS=51;NUMALT=1;ODDS=1.92942;PAIRED=1;PAIREDR=1;PAO=0;PQA=0;PQR=0;PRO=0;QA=954;QR=5876;RO=158;RPL=13;RPP=3.0103;RPPR=3.2302;RPR=13;RUN=1;SAF=7;SAP=15.0369;SAR=19;SRF=38;SRP=95.4216;SRR=120;TYPE=snp;ANN=A
chr5B	684120885	A	G	ALT1	REF	intergenic_region	MODIFIER	TRIDC5BG077490-TRIDC5BG077530	AB=0.567568;ABP=4.47751;AC=31;AF=0.121094;AN=256;AO=80;CIGAR=1X;DP=677;DPB=677;DPRA=1.40782;EPP=30.8051;EPPR=228.527;GTI=7;LEN=1;MEANALT=1;MQM=70;MQMR=70;NS=64;NUMALT=1;ODDS=7.99696;PAIRED=1;PAIREDR=1;PAO=0;PQA=0;PQR=0;PRO=0;QA=2987;QR=21819;RO=597;RPL=31;RPP=11.8048;RPPR=197.101;RPR=49;RUN=1;SAF=71;SAP=107.35;SAR=9;SRF=556;SRP=967.715;SRR=41;TYPE=snp;ANN=G
chr5B	684139990	C	T	ALT1	REF	intergenic_region	MODIFIER	TRIDC5BG077490-TRIDC5BG077530	AB=0.137795;ABP=292.449;AC=29;AF=0.125;AN=232;AO=39;CIGAR=1X;DP=451;DPB=451;DPRA=2.94749;EPP=23.1103;EPPR=218.07;GTI=15;LEN=1;MEANALT=1;MQM=44.7949;MQMR=54.8689;NS=58;NUMALT=1;ODDS=0.592212;PAIRED=1;PAIREDR=1;PAO=0;PQA=0;PQR=0;PRO=0;QA=1378;QR=14490;RO=412;RPL=25;RPP=9.74743;RPPR=13.2141;RPR=14;RUN=1;SAF=35;SAP=56.5176;SAR=4;SRF=197;SRP=4.71796;SRR=215;TYPE=snp;ANN=T
chr5B	684140016	C	T	ALT1	REF	intergenic_region	MODIFIER	TRIDC5BG077490-TRIDC5BG077530	AB=0.178218;ABP=184.683;AC=27;AF=0.114407;AN=236;AO=40;CIGAR=1X;DP=388;DPB=388;DPRA=2.9951;EPP=58.6;EPPR=86.9739;GTI=11;LEN=1;MEANALT=1;MQM=45;MQMR=54.6207;NS=59;NUMALT=1;ODDS=0.059051;PAIRED=1;PAIREDR=1;PAO=0;PQA=0;PQR=0;PRO=0;QA=1401;QR=12274;RO=348;RPL=22;RPP=3.87889;RPPR=15.0907;RPR=18;RUN=1;SAF=26;SAP=10.8276;SAR=14;SRF=114;SRP=92.8643;SRR=234;TYPE=snp;ANN=T
chr5B	684140110	CG	CA,TT	ALT1	REF	intergenic_region	MODIFIER	TRIDC5BG077490-TRIDC5BG077530	AB=0.292517,0.237288;ABP=57.9766,73.7488;AC=48,31;AF=0.27907,0.180233;AN=172;AO=51,31;CIGAR=1M1X,2X;DP=183;DPB=187;DPRA=4.92063,4.9276;EPP=6.45911,14.8483;EPPR=3.20771;GTI=30;LEN=1,2;MEANALT=1.5,1.64706;MQM=45.1569,62;MQMR=59.303;NS=43;NUMALT=2;ODDS=0.719333;PAIRED=1,1;PAIREDR=1;PAO=3.5,0;PQA=114,0;PQR=114;PRO=3.5;QA=1754,1156;QR=3588;RO=99;RPL=34,21;RPP=15.3153,11.486;RPPR=4.08507;RPR=17,10;RUN=…
chr5B	684140967	A	G	REF	ALT1	intergenic_region	MODIFIER	TRIDC5BG077490-TRIDC5BG077530	AB=0.261538;ABP=67.2191;AC=46;AF=0.302632;AN=152;AO=43;CIGAR=1X;DP=169;DPB=169;DPRA=5.72353;EPP=4.27278;EPPR=3.28604;GTI=12;LEN=1;MEANALT=1;MQM=43.3023;MQMR=42.9286;NS=38;NUMALT=1;ODDS=0.266995;PAIRED=1;PAIREDR=1;PAO=0;PQA=0;PQR=0;PRO=0;QA=1639;QR=4695;RO=126;RPL=24;RPP=4.27278;RPPR=4.73369;RPR=19;RUN=1;SAF=5;SAP=58.0041;SAR=38;SRF=53;SRP=9.90386;SRR=73;TYPE=snp;ANN=G
chr5B	684141833	T	G	ALT1	REF	intergenic_region	MODIFIER	TRIDC5BG077490-TRIDC5BG077530	AB=0.138889;ABP=125.337;AC=9;AF=0.0381356;AN=236;AO=18;CIGAR=1X;DP=631;DPB=631;DPRA=1.70256;EPP=10.7311;EPPR=63.8009;GTI=4;LEN=1;MEANALT=1;MQM=28.6111;MQMR=49.3719;NS=59;NUMALT=1;ODDS=0.936434;PAIRED=1;PAIREDR=1;PAO=0;PQA=0;PQR=0;PRO=0;QA=608;QR=22467;RO=613;RPL=12;RPP=7.35324;RPPR=15.3413;RPR=6;RUN=1;SAF=7;SAP=4.9405;SAR=11;SRF=335;SRP=14.5195;SRR=278;TYPE=snp;ANN=G
chr5B	684141930	C	T	REF	ALT1	intergenic_region	MODIFIER	TRIDC5BG077490-TRIDC5BG077530	AB=0.849206;ABP=136.47;AC=214;AF=0.938596;AN=228;AO=376;CIGAR=1X;DP=400;DPB=400;DPRA=7.125;EPP=19.8508;EPPR=46.8017;GTI=9;LEN=1;MEANALT=1;MQM=49.8085;MQMR=31.6667;NS=57;NUMALT=1;ODDS=3.07352;PAIRED=1;PAIREDR=1;PAO=0;PQA=0;PQR=0;PRO=0;QA=14176;QR=884;RO=24;RPL=267;RPP=147.182;RPPR=46.8017;RPR=109;RUN=1;SAF=108;SAP=150.855;SAR=268;SRF=0;SRP=55.1256;SRR=24;TYPE=snp;ANN=T
chr5B	684141936	G	A	ALT1	REF	intergenic_region	MODIFIER	TRIDC5BG077490-TRIDC5BG077530	AB=0.208333;ABP=20.744;AC=6;AF=0.0263158;AN=228;AO=9;CIGAR=1X;DP=416;DPB=416;DPRA=2.28739;EPP=22.5536;EPPR=21.0025;GTI=2;LEN=1;MEANALT=1;MQM=27.4444;MQMR=49.4754;NS=57;NUMALT=1;ODDS=4.10944;PAIRED=1;PAIREDR=1;PAO=0;PQA=0;PQR=0;PRO=0;QA=326;QR=15278;RO=406;RPL=9;RPP=22.5536;RPPR=123.351;RPR=0;RUN=1;SAF=0;SAP=22.5536;SAR=9;SRF=112;SRP=180.172;SRR=294;TYPE=snp;ANN=A
chr5B	684142918	G	A	ALT1	REF	intergenic_region	MODIFIER	TRIDC5BG077490-TRIDC5BG077530	AB=0.311688;ABP=145.312;AC=50;AF=0.204918;AN=244;AO=147;CIGAR=1X;DP=566;DPB=566;DPRA=3.42008;EPP=8.34296;EPPR=4.88119;GTI=6;LEN=1;MEANALT=1;MQM=61.0136;MQMR=61.4535;NS=61;NUMALT=1;ODDS=0.113301;PAIRED=1;PAIREDR=1;PAO=0;PQA=0;PQR=0;PRO=0;QA=5552;QR=15370;RO=419;RPL=70;RPP=3.73412;RPPR=7.36879;RPR=77;RUN=1;SAF=71;SAP=3.3796;SAR=76;SRF=214;SRP=3.43008;SRR=205;TYPE=snp;ANN=A
chr5B	684143528	G	T	REF	ALT1	intergenic_region	MODIFIER	TRIDC5BG077490-TRIDC5BG077530	AB=0.592982;ABP=24.4126;AC=109;AF=0.579787;AN=188;AO=207;CIGAR=1X;DP=342;DPB=342;DPRA=5.8415;EPP=3.02079;EPPR=11.3515;GTI=23;LEN=1;MEANALT=1.13889;MQM=66.6957;MQMR=37.6905;NS=47;NUMALT=1;ODDS=0.00225724;PAIRED=1;PAIREDR=1;PAO=0;PQA=0;PQR=0;PRO=0;QA=7560;QR=4570;RO=126;RPL=91;RPP=9.56668;RPPR=5.49198;RPR=116;RUN=1;SAF=101;SAP=3.27256;SAR=106;SRF=49;SRP=16.5217;SRR=77;TYPE=snp;ANN=T
chr5B	684143839	A	T	ALT1	REF	intergenic_region	MODIFIER	TRIDC5BG077490-TRIDC5BG077530	AB=0.179372;ABP=401.256;AC=20;AF=0.0793651;AN=252;AO=95;CIGAR=1X;DP=1505;DPB=1505;DPRA=2.34033;EPP=4.13032;EPPR=88.785;GTI=4;LEN=1;MEANALT=1;MQM=63.8211;MQMR=65.8121;NS=63;NUMALT=1;ODDS=0.833573;PAIRED=1;PAIREDR=1;PAO=0;PQA=0;PQR=0;PRO=0;QA=3537;QR=52931;RO=1410;RPL=49;RPP=3.21602;RPPR=44.4315;RPR=46;RUN=1;SAF=28;SAP=37.7767;SAR=67;SRF=580;SRP=99.2635;SRR=830;TYPE=snp;ANN=T
chr5B	684143868	T	C	ALT1	REF	intergenic_region	MODIFIER	TRIDC5BG077490-TRIDC5BG077530	AB=0.164384;ABP=360.113;AC=19;AF=0.0766129;AN=248;AO=74;CIGAR=1X;DP=1326;DPB=1326;DPRA=2.27042;EPP=17.2129;EPPR=27.1601;GTI=5;LEN=1;MEANALT=1;MQM=59.1351;MQMR=62.9089;NS=62;NUMALT=1;ODDS=2.74694;PAIRED=1;PAIREDR=1;PAO=0;PQA=0;PQR=0;PRO=0;QA=2772;QR=46512;RO=1252;RPL=47;RPP=14.748;RPPR=3.01724;RPR=27;RUN=1;SAF=25;SAP=19.9126;SAR=49;SRF=628;SRP=3.03805;SRR=624;TYPE=snp;ANN=C
chr5B	684143913	G	A	ALT1	REF	intergenic_region	MODIFIER	TRIDC5BG077490-TRIDC5BG077530	AB=0.12069;ABP=437.904;AC=16;AF=0.0645161;AN=248;AO=47;CIGAR=1X;DP=1189;DPB=1189;DPRA=2.48658;EPP=8.60069;EPPR=19.5575;GTI=5;LEN=1;MEANALT=1.33333;MQM=48.0638;MQMR=59.3348;NS=62;NUMALT=1;ODDS=1.48119;PAIRED=1;PAIREDR=1;PAO=0;PQA=0;PQR=0;PRO=0;QA=1702;QR=41758;RO=1135;RPL=27;RPP=5.27418;RPPR=11.0935;RPR=20;RUN=1;SAF=19;SAP=6.75262;SAR=28;SRF=567;SRP=3.01221;SRR=568;TYPE=snp;ANN=A
chr5B	684143949	C	T	ALT1	REF	intergenic_region	MODIFIER	TRIDC5BG077490-TRIDC5BG077530	AB=0.102804;ABP=442.886;AC=15;AF=0.0604839;AN=248;AO=37;CIGAR=1X;DP=1104;DPB=1104;DPRA=2.45685;EPP=3.06899;EPPR=66.7686;GTI=3;LEN=1;MEANALT=1;MQM=44.3514;MQMR=59.7451;NS=62;NUMALT=1;ODDS=0.557909;PAIRED=1;PAIREDR=1;PAO=0;PQA=0;PQR=0;PRO=0;QA=1318;QR=38904;RO=1067;RPL=28;RPP=24.1968;RPPR=24.6009;RPR=9;RUN=1;SAF=11;SAP=16.2152;SAR=26;SRF=456;SRP=51.904;SRR=611;TYPE=snp;ANN=T
chr5B	684144001	G	A	ALT1	REF	intergenic_region	MODIFIER	TRIDC5BG077490-TRIDC5BG077530	AB=0.119266;ABP=140.251;AC=12;AF=0.047619;AN=252;AO=25;CIGAR=1X;DP=953;DPB=953;DPRA=2.12216;EPP=7.26639;EPPR=78.0655;GTI=4;LEN=1;MEANALT=1;MQM=34.32;MQMR=62.4272;NS=63;NUMALT=1;ODDS=0.251426;PAIRED=1;PAIREDR=1;PAO=0;PQA=0;PQR=0;PRO=0;QA=897;QR=33775;RO=927;RPL=9;RPP=7.26639;RPPR=3.06886;RPR=16;RUN=1;SAF=9;SAP=7.26639;SAR=16;SRF=389;SRP=55.0155;SRR=538;TYPE=snp;ANN=A
chr5B	684144022	C	T	ALT1	REF	intergenic_region	MODIFIER	TRIDC5BG077490-TRIDC5BG077530	AB=0.116279;ABP=167.992;AC=12;AF=0.047619;AN=252;AO=26;CIGAR=1X;DP=1009;DPB=1009;DPRA=2.24796;EPP=11.3621;EPPR=97.8578;GTI=3;LEN=1;MEANALT=1;MQM=33.0769;MQMR=61.1142;NS=63;NUMALT=1;ODDS=0.178203;PAIRED=1;PAIREDR=1;PAO=0;PQA=0;PQR=0;PRO=0;QA=994;QR=36165;RO=981;RPL=12;RPP=3.34437;RPPR=3.27814;RPR=14;RUN=1;SAF=10;SAP=6.01695;SAR=16;SRF=453;SRP=15.4614;SRR=528;TYPE=snp;ANN=T
chr5B	684144386	G	A	REF	ALT1	intergenic_region	MODIFIER	TRIDC5BG077490-TRIDC5BG077530	AB=0.752427;ABP=231.036;AC=188;AF=0.770492;AN=244;AO=470;CIGAR=1X;DP=581;DPB=581;DPRA=8.94545;EPP=11.9549;EPPR=3.08926;GTI=17;LEN=1;MEANALT=1.01818;MQM=68.2064;MQMR=34.8455;NS=61;NUMALT=1;ODDS=0.237213;PAIRED=1;PAIREDR=1;PAO=0;PQA=0;PQR=0;PRO=0;QA=17699;QR=3997;RO=110;RPL=298;RPP=76.3599;RPPR=25.8305;RPR=172;RUN=1;SAF=155;SAP=121.286;SAR=315;SRF=26;SRP=69.4179;SRR=84;TYPE=snp;ANN=A
chr5B	684225246	A	G	ALT1	REF	upstream_gene_variant	MODIFIER	TRIDC5BG077530	AB=0;ABP=0;AC=4;AF=0.0714286;AN=56;AO=2;CIGAR=1X;DP=21;DPB=21;DPRA=1.36842;EPP=7.35324;EPPR=16.8392;GTI=0;LEN=1;MEANALT=1;MQM=26;MQMR=27.3158;NS=14;NUMALT=1;ODDS=6.01368;PAIRED=1;PAIREDR=1;PAO=0;PQA=0;PQR=0;PRO=0;QA=72;QR=673;RO=19;RPL=1;RPP=3.0103;RPPR=4.03889;RPR=1;RUN=1;SAF=1;SAP=3.0103;SAR=1;SRF=4;SRP=16.8392;SRR=15;TYPE=snp;ANN=G
chr5B	684225263	C	T	ALT1	REF	upstream_gene_variant	MODIFIER	TRIDC5BG077530	AB=0;ABP=0;AC=12;AF=0.2;AN=60;AO=4;CIGAR=1X;DP=23;DPB=23;DPRA=0.842105;EPP=3.0103;EPPR=12.2676;GTI=2;LEN=1;MEANALT=1;MQM=24.5;MQMR=30.4211;NS=15;NUMALT=1;ODDS=6.18297;PAIRED=1;PAIREDR=1;PAO=0;PQA=0;PQR=0;PRO=0;QA=155;QR=721;RO=19;RPL=3;RPP=5.18177;RPPR=3.12459;RPR=1;RUN=1;SAF=1;SAP=5.18177;SAR=3;SRF=4;SRP=16.8392;SRR=15;TYPE=snp;ANN=T
chr5B	684229717	A	G	REF	ALT1	upstream_gene_variant	MODIFIER	TRIDC5BG077530	AB=0.333333;ABP=6.62942;AC=108;AF=0.771429;AN=140;AO=50;CIGAR=1X;DP=70;DPB=70;DPRA=1.5;EPP=28.0257;EPPR=24.2907;GTI=8;LEN=1;MEANALT=1;MQM=70;MQMR=70;NS=35;NUMALT=1;ODDS=1.85124;PAIRED=1;PAIREDR=1;PAO=0;PQA=0;PQR=0;PRO=0;QA=1881;QR=754;RO=20;RPL=11;RPP=37.059;RPPR=24.2907;RPR=39;RUN=1;SAF=48;SAP=94.907;SAR=2;SRF=20;SRP=46.4397;SRR=0;TYPE=snp;ANN=G
chr5B	684229809	T	C	REF	ALT1	synonymous_variant	LOW	TRIDC5BG077530	AB=0.511111;ABP=3.10681;AC=184;AF=0.836364;AN=220;AO=278;CIGAR=1X;DP=378;DPB=378;DPRA=0.838542;EPP=50.5327;EPPR=22.5536;GTI=9;LEN=1;MEANALT=1;MQM=70;MQMR=70;NS=55;NUMALT=1;ODDS=0.12458;PAIRED=1;PAIREDR=1;PAO=0;PQA=0;PQR=0;PRO=0;QA=10429;QR=3168;RO=100;RPL=93;RPP=69.123;RPPR=37.7539;RPR=185;RUN=1;SAF=265;SAP=499.043;SAR=13;SRF=95;SRP=178.9;SRR=5;TYPE=snp;ANN=C
chr5B	684230157	CATC	TGTT,CGTC	ALT2	ALT1	missense_variant	MODERATE	TRIDC5BG077530	AB=0.424242,0.575758;ABP=4.65535,4.65535;AC=195,29;AF=0.870536,0.129464;AN=224;AO=221,27;CIGAR=2X1M1X,1M1X2M;DP=248;DPB=249;DPRA=2.94118,1.03435;EPP=30.6106,26.2531;EPPR=0;GTI=8;LEN=4,1;MEANALT=1.07843,1.44444;MQM=70,70;MQMR=0;NS=56;NUMALT=2;ODDS=0.138795;PAIRED=1,1;PAIREDR=0;PAO=0,2;PQA=0,64.5;PQR=64.5;PRO=2;QA=7552,989;QR=0;RO=0;RPL=149,22;RPP=61.2667,26.2531;RPPR=0;RPR=72,5;RUN=1,1;SAF=36,4;SA…
chr5B	684230274	GAA	GGC,AGC	ALT2	ALT1	missense_variant	MODERATE	TRIDC5BG077530	AB=0.333333,0.666667;ABP=10.2485,10.2485;AC=167,21;AF=0.888298,0.111702;AN=188;AO=134,27;CIGAR=1M2X,3X;DP=161;DPB=162.667;DPRA=2.04651,2.03898;EPP=122.863,12.7417;EPPR=0;GTI=5;LEN=2,3;MEANALT=1.04651,1.33333;MQM=70,70;MQMR=0;NS=47;NUMALT=2;ODDS=1.6215;PAIRED=1,1;PAIREDR=0;PAO=2,0;PQA=66,0;PQR=66;PRO=2;QA=4734,961;QR=0;RO=0;RPL=24,8;RPP=122.863,12.7417;RPPR=0;RPR=110,19;RUN=1,1;SAF=128,27;SAP=244.…
chr5B	684230281	G	A	ALT1	REF	missense_variant	MODERATE	TRIDC5BG077530	AB=0.6;ABP=6.48466;AC=24;AF=0.115385;AN=208;AO=33;CIGAR=1X;DP=227;DPB=227;DPRA=1.76966;EPP=14.1309;EPPR=192.175;GTI=5;LEN=1;MEANALT=1;MQM=70;MQMR=70;NS=52;NUMALT=1;ODDS=1.12893;PAIRED=1;PAIREDR=1;PAO=0;PQA=0;PQR=0;PRO=0;QA=1173;QR=6896;RO=194;RPL=10;RPP=14.1309;RPPR=203.995;RPR=23;RUN=1;SAF=33;SAP=74.6689;SAR=0;SRF=186;SRP=357.654;SRR=8;TYPE=snp;ANN=A
chr5B	684230295	T	C	ALT1	REF	synonymous_variant	LOW	TRIDC5BG077530	AB=0.622951;ABP=11.0198;AC=30;AF=0.131579;AN=228;AO=50;CIGAR=1X;DP=331;DPB=331;DPRA=1.50904;EPP=17.0814;EPPR=123.755;GTI=8;LEN=1;MEANALT=1;MQM=70;MQMR=70;NS=57;NUMALT=1;ODDS=0.175392;PAIRED=1;PAIREDR=1;PAO=0;PQA=0;PQR=0;PRO=0;QA=1847;QR=10150;RO=281;RPL=14;RPP=24.0302;RPPR=183.907;RPR=36;RUN=1;SAF=48;SAP=94.907;SAR=2;SRF=263;SRP=466.863;SRR=18;TYPE=snp;ANN=C
chr5B	684230573	C	A	REF	ALT1	3_prime_UTR_variant	MODIFIER	TRIDC5BG077530	AB=0.5625;ABP=4.09604;AC=140;AF=0.833333;AN=168;AO=120;CIGAR=1X;DP=143;DPB=143;DPRA=2.48148;EPP=17.1973;EPPR=14.4341;GTI=7;LEN=1;MEANALT=1;MQM=70;MQMR=70;NS=42;NUMALT=1;ODDS=1.27303;PAIRED=1;PAIREDR=1;PAO=0;PQA=0;PQR=0;PRO=0;QA=4040;QR=836;RO=23;RPL=75;RPP=19.2963;RPPR=14.4341;RPR=45;RUN=1;SAF=1;SAP=254.973;SAR=119;SRF=0;SRP=52.9542;SRR=23;TYPE=snp;ANN=A
chr5B	684233140	A	G	REF	ALT1	downstream_gene_variant	MODIFIER	TRIDC5BG077530	AB=0.666667;ABP=3.73412;AC=43;AF=0.826923;AN=52;AO=13;CIGAR=1X;DP=16;DPB=16;DPRA=1.27273;EPP=7.18621;EPPR=3.73412;GTI=2;LEN=1;MEANALT=1;MQM=45.4615;MQMR=70;NS=13;NUMALT=1;ODDS=4.84043;PAIRED=1;PAIREDR=1;PAO=0;PQA=0;PQR=0;PRO=0;QA=429;QR=107;RO=3;RPL=9;RPP=7.18621;RPPR=3.73412;RPR=4;RUN=1;SAF=9;SAP=7.18621;SAR=4;SRF=2;SRP=3.73412;SRR=1;TYPE=snp;ANN=G
chr5B	684233148	C	T	REF	ALT1	downstream_gene_variant	MODIFIER	TRIDC5BG077530	AB=0.333333;ABP=3.73412;AC=25;AF=0.520833;AN=48;AO=9;CIGAR=1X;DP=16;DPB=16;DPRA=1.57143;EPP=5.18177;EPPR=10.7656;GTI=1;LEN=1;MEANALT=1;MQM=56;MQMR=42.4286;NS=12;NUMALT=1;ODDS=15.9899;PAIRED=1;PAIREDR=1;PAO=0;PQA=0;PQR=0;PRO=0;QA=286;QR=247;RO=7;RPL=6;RPP=5.18177;RPPR=5.80219;RPR=3;RUN=1;SAF=5;SAP=3.25157;SAR=4;SRF=6;SRP=10.7656;SRR=1;TYPE=snp;ANN=T
chr5B	684235830	G	C	ALT1	REF	missense_variant	MODERATE	TRIDC5BG077530	AB=0.329317;ABP=66.0179;AC=30;AF=0.117188;AN=256;AO=120;CIGAR=1X;DP=1265;DPB=1265;DPRA=1.41392;EPP=7.64277;EPPR=20.8543;GTI=7;LEN=1;MEANALT=1;MQM=70;MQMR=69.614;NS=64;NUMALT=1;ODDS=1.94788;PAIRED=1;PAIREDR=1;PAO=0;PQA=0;PQR=0;PRO=0;QA=4337;QR=40961;RO=1145;RPL=49;RPP=11.7686;RPPR=62.4252;RPR=71;RUN=1;SAF=87;SAP=55.7771;SAR=33;SRF=828;SRP=498.222;SRR=317;TYPE=snp;ANN=C
chr5B	684235886	G	C	ALT1	REF	synonymous_variant	LOW	TRIDC5BG077530	AB=0.355346;ABP=60.807;AC=31;AF=0.121094;AN=256;AO=164;CIGAR=1X;DP=1520;DPB=1520;DPRA=1.37744;EPP=20.1702;EPPR=189.358;GTI=7;LEN=1;MEANALT=1;MQM=70;MQMR=70;NS=64;NUMALT=1;ODDS=0.202845;PAIRED=1;PAIREDR=1;PAO=0;PQA=0;PQR=0;PRO=0;QA=5828;QR=47406;RO=1355;RPL=97;RPP=14.9269;RPPR=24.2042;RPR=67;RUN=1;SAF=105;SAP=31.0276;SAR=59;SRF=752;SRP=38.5888;SRR=603;TYPE=snp;ANN=C
chr5B	684235893	A	G	ALT1	REF	missense_variant	MODERATE	TRIDC5BG077530	AB=0.354749;ABP=68.6155;AC=33;AF=0.128906;AN=256;AO=174;CIGAR=1X;DP=1571;DPB=1571;DPRA=1.36265;EPP=34.2096;EPPR=192.336;GTI=9;LEN=1;MEANALT=1;MQM=70;MQMR=70;NS=64;NUMALT=1;ODDS=0.035649;PAIRED=1;PAIREDR=1;PAO=0;PQA=0;PQR=0;PRO=0;QA=6216;QR=49581;RO=1397;RPL=103;RPP=15.7895;RPPR=22.8582;RPR=71;RUN=1;SAF=105;SAP=19.184;SAR=69;SRF=761;SRP=27.2975;SRR=636;TYPE=snp;ANN=G
chr5B	684235899	G	A	ALT1	REF	missense_variant	MODERATE	TRIDC5BG077530	AB=0.351351;ABP=66.922;AC=30;AF=0.117188;AN=256;AO=166;CIGAR=1X;DP=1588;DPB=1588;DPRA=1.36093;EPP=44.0328;EPPR=269.485;GTI=7;LEN=1;MEANALT=1;MQM=70;MQMR=70;NS=64;NUMALT=1;ODDS=1.01674;PAIRED=1;PAIREDR=1;PAO=0;PQA=0;PQR=0;PRO=0;QA=5746;QR=50920;RO=1417;RPL=97;RPP=13.2659;RPPR=13.0647;RPR=69;RUN=1;SAF=94;SAP=9.34158;SAR=72;SRF=767;SRP=23.9879;SRR=650;TYPE=snp;ANN=A
chr5B	684236200	CCGGC	CAGGC	ALT1	REF	synonymous_variant	LOW	TRIDC5BG077530	AB=0.401515;ABP=14.1309;AC=31;AF=0.121094;AN=256;AO=93;CIGAR=1M1X3M;DP=858;DPB=880.6;DPRA=1.3836;EPP=68.5981;EPPR=207.325;GTI=15;LEN=1;MEANALT=1.4;MQM=70;MQMR=70;NS=64;NUMALT=1;ODDS=0.0925862;PAIRED=1;PAIREDR=1;PAO=13.5;PQA=354;PQR=1023;PRO=34.5;QA=3485;QR=27705;RO=752;RPL=31;RPP=25.4488;RPPR=137.734;RPR=62;RUN=1;SAF=66;SAP=38.5244;SAR=27;SRF=509;SRP=207.325;SRR=243;TYPE=snp;ANN=CAGGC
chr5B	684236242	A	T	REF	ALT1	missense_variant	MODERATE	TRIDC5BG077530	AB=0.633943;ABP=96.6654;AC=189;AF=0.738281;AN=256;AO=925;CIGAR=1X;DP=1265;DPB=1265;DPRA=1.09712;EPP=6.22408;EPPR=39.0414;GTI=12;LEN=1;MEANALT=1;MQM=70;MQMR=53.7817;NS=64;NUMALT=1;ODDS=0.239679;PAIRED=1;PAIREDR=1;PAO=0;PQA=0;PQR=0;PRO=0;QA=33154;QR=11859;RO=339;RPL=427;RPP=14.8442;RPPR=3.52915;RPR=498;RUN=1;SAF=728;SAP=664.924;SAR=197;SRF=239;SRP=126.771;SRR=100;TYPE=snp;ANN=T
chr5B	684236432	G	C	REF	ALT1	downstream_gene_variant	MODIFIER	TRIDC5BG077530	AB=0.628866;ABP=44.9846;AC=214;AF=0.835938;AN=256;AO=1621;CIGAR=1X;DP=1993;DPB=1993;DPRA=0.792954;EPP=38.6018;EPPR=47.552;GTI=5;LEN=1;MEANALT=1.05172;MQM=69.5256;MQMR=67.4688;NS=64;NUMALT=1;ODDS=0.138832;PAIRED=1;PAIREDR=1;PAO=0;PQA=0;PQR=0;PRO=0;QA=61158;QR=13713;RO=369;RPL=868;RPP=20.7264;RPPR=6.12333;RPR=753;RUN=1;SAF=611;SAP=216.274;SAR=1010;SRF=147;SRP=36.112;SRR=222;TYPE=snp;ANN=C
chr5B	684236520	C	G	ALT1	REF	downstream_gene_variant	MODIFIER	TRIDC5BG077530	AB=0.45122;ABP=4.70511;AC=38;AF=0.148438;AN=256;AO=118;CIGAR=1X;DP=854;DPB=854;DPRA=1.06993;EPP=78.3862;EPPR=23.3631;GTI=8;LEN=1;MEANALT=1;MQM=60.5;MQMR=67.6667;NS=64;NUMALT=1;ODDS=0.859853;PAIRED=1;PAIREDR=1;PAO=0;PQA=0;PQR=0;PRO=0;QA=4606;QR=27316;RO=735;RPL=91;RPP=78.3862;RPPR=311.238;RPR=27;RUN=1;SAF=0;SAP=259.244;SAR=118;SRF=126;SRP=692.236;SRR=609;TYPE=snp;ANN=G
chr5B	684236585	C	T	ALT1	REF	downstream_gene_variant	MODIFIER	TRIDC5BG077530	AB=0.428571;ABP=3.32051;AC=28;AF=0.112903;AN=248;AO=19;CIGAR=1X;DP=269;DPB=269;DPRA=0.631098;EPP=8.61041;EPPR=25.693;GTI=15;LEN=1;MEANALT=1;MQM=50;MQMR=62.2169;NS=62;NUMALT=1;ODDS=1.01308;PAIRED=1;PAIREDR=1;PAO=0;PQA=0;PQR=0;PRO=0;QA=657;QR=9203;RO=249;RPL=13;RPP=8.61041;RPPR=29.3906;RPR=6;RUN=1;SAF=0;SAP=44.2683;SAR=19;SRF=2;SRP=526.475;SRR=247;TYPE=snp;ANN=T
chr5B	684246358	T	C	REF	ALT1	intron_variant	MODIFIER	TRIDC5BG077540	AB=0.585159;ABP=92.142;AC=196;AF=0.765625;AN=256;AO=1841;CIGAR=1X;DP=2519;DPB=2519;DPRA=3.39254;EPP=4.00227;EPPR=8.13472;GTI=10;LEN=1;MEANALT=1;MQM=69.9967;MQMR=69.9853;NS=64;NUMALT=1;ODDS=0.121284;PAIRED=1;PAIREDR=1;PAO=0;PQA=0;PQR=0;PRO=0;QA=68416;QR=24970;RO=678;RPL=770;RPP=109.875;RPPR=38.9965;RPR=1071;RUN=1;SAF=1232;SAP=460.811;SAR=609;SRF=465;SRP=206.398;SRR=213;TYPE=snp;ANN=C
chr5B	684246519	A	G	REF	ALT1	splice_region_variant&intron_variant	LOW	TRIDC5BG077540	AB=0.591965;ABP=120.034;AC=198;AF=0.773438;AN=256;AO=1981;CIGAR=1X;DP=2709;DPB=2709;DPRA=4.07926;EPP=4.20401;EPPR=3.44101;GTI=15;LEN=1;MEANALT=1.03448;MQM=67.6916;MQMR=67.5386;NS=64;NUMALT=1;ODDS=0.0301585;PAIRED=1;PAIREDR=1;PAO=0;PQA=0;PQR=0;PRO=0;QA=72747;QR=25615;RO=726;RPL=939;RPP=14.6394;RPPR=4.45795;RPR=1042;RUN=1;SAF=799;SAP=163.803;SAR=1182;SRF=293;SRP=61.6341;SRR=433;TYPE=snp;ANN=G
chr5B	684247007	C	T	ALT1	REF	upstream_gene_variant	MODIFIER	TRIDC5BG077540	AB=0.309524;ABP=55.9529;AC=25;AF=0.0992063;AN=252;AO=66;CIGAR=1X;DP=953;DPB=953;DPRA=1.16173;EPP=18.9344;EPPR=308.067;GTI=7;LEN=1;MEANALT=1;MQM=70;MQMR=68.8591;NS=63;NUMALT=1;ODDS=0.868173;PAIRED=1;PAIREDR=1;PAO=0;PQA=0;PQR=0;PRO=0;QA=2463;QR=32792;RO=887;RPL=41;RPP=11.433;RPPR=846.553;RPR=25;RUN=1;SAF=9;SAP=78.8144;SAR=57;SRF=205;SRP=560.026;SRR=682;TYPE=snp;ANN=T
chr5B	684247046	CA	CG,TG	ALT2	ALT1	upstream_gene_variant	MODIFIER	TRIDC5BG077540	AB=0.557377,0.45614;ABP=4.7546,3.9627;AC=208,27;AF=0.881356,0.114407;AN=236;AO=292,45;CIGAR=1M1X,2X;DP=340;DPB=353;DPRA=1.91261,1.82692;EPP=136.541,43.5927;EPPR=9.52472;GTI=9;LEN=1,2;MEANALT=1.03774,1.25;MQM=70,70;MQMR=10.6667;NS=59;NUMALT=2;ODDS=1.22522;PAIRED=1,1;PAIREDR=1;PAO=11.5,0;PQA=386,0;PQR=386;PRO=11.5;QA=10629,1669;QR=115;RO=3;RPL=163,25;RPP=11.607,4.21667;RPPR=9.52472;RPR=129,20;RUN=1…
chr5B	684247286	C	T	ALT1	REF	upstream_gene_variant	MODIFIER	TRIDC5BG077540	AB=0.364486;ABP=37.145;AC=33;AF=0.130952;AN=252;AO=96;CIGAR=1X;DP=1107;DPB=1107;DPRA=1.12686;EPP=3.8246;EPPR=3.02967;GTI=9;LEN=1;MEANALT=1;MQM=70;MQMR=69.1477;NS=63;NUMALT=1;ODDS=1.51942;PAIRED=1;PAIREDR=1;PAO=0;PQA=0;PQR=0;PRO=0;QA=3475;QR=36363;RO=1009;RPL=44;RPP=4.45795;RPPR=17.8361;RPR=52;RUN=1;SAF=43;SAP=5.27225;SAR=53;SRF=374;SRP=149.614;SRR=635;TYPE=snp;ANN=T
chr5B	684247480	A	C	ALT1	REF	upstream_gene_variant	MODIFIER	TRIDC5BG077540	AB=0.310924;ABP=39.9618;AC=23;AF=0.102679;AN=224;AO=43;CIGAR=1X;DP=536;DPB=536;DPRA=2.12895;EPP=3.46479;EPPR=8.11238;GTI=6;LEN=1;MEANALT=1.14286;MQM=70;MQMR=69.9167;NS=56;NUMALT=1;ODDS=1.83758;PAIRED=1;PAIREDR=1;PAO=0;PQA=0;PQR=0;PRO=0;QA=1512;QR=17368;RO=492;RPL=24;RPP=4.27278;RPPR=17.8575;RPR=19;RUN=1;SAF=12;SAP=21.2406;SAR=31;SRF=146;SRP=179.553;SRR=346;TYPE=snp;ANN=C
chr5B	684247490	C	A	ALT1	REF	upstream_gene_variant	MODIFIER	TRIDC5BG077540	AB=0.299065;ABP=40.5342;AC=23;AF=0.104545;AN=220;AO=38;CIGAR=1X;DP=501;DPB=501;DPRA=1.99705;EPP=5.06748;EPPR=13.3705;GTI=6;LEN=1;MEANALT=1;MQM=70;MQMR=69.9114;NS=55;NUMALT=1;ODDS=2.39688;PAIRED=1;PAIREDR=1;PAO=0;PQA=0;PQR=0;PRO=0;QA=1367;QR=16849;RO=463;RPL=17;RPP=3.9246;RPPR=13.3705;RPR=21;RUN=1;SAF=11;SAP=17.6392;SAR=27;SRF=129;SRP=200.108;SRR=334;TYPE=snp;ANN=A
chr5B	684248227	TGG	TAG	ALT1	REF	upstream_gene_variant	MODIFIER	TRIDC5BG077540	AB=0.488636;ABP=3.20771;AC=32;AF=0.135593;AN=236;AO=97;CIGAR=1M1X1M;DP=518;DPB=532;DPRA=2.54879;EPP=4.82359;EPPR=16.8196;GTI=16;LEN=1;MEANALT=1.54545;MQM=70;MQMR=66.9633;NS=59;NUMALT=1;ODDS=0.0614513;PAIRED=1;PAIREDR=1;PAO=5.33333;PQA=81.6667;PQR=615.167;PRO=21.3333;QA=3553;QR=14950;RO=409;RPL=46;RPP=3.56996;RPPR=13.7615;RPR=51;RUN=1;SAF=64;SAP=24.5235;SAR=33;SRF=291;SRP=161.91;SRR=118;TYPE=snp;A…
chr5B	684248275	GCACC	GAACC	REF	ALT1	upstream_gene_variant	MODIFIER	TRIDC5BG077540	AB=0.285714;ABP=217.986;AC=97;AF=0.397541;AN=244;AO=174;CIGAR=1M1X3M;DP=612;DPB=645;DPRA=4.77134;EPP=3.20998;EPPR=18.4661;GTI=35;LEN=1;MEANALT=1.04762;MQM=69.9368;MQMR=66.2141;NS=61;NUMALT=1;ODDS=0.194838;PAIRED=1;PAIREDR=1;PAO=20.5;PQA=583.5;PQR=1409.5;PRO=46.5;QA=6345;QR=15002;RO=425;RPL=77;RPP=8.00219;RPPR=3.26066;RPR=97;RUN=1;SAF=106;SAP=21.031;SAR=68;SRF=246;SRP=25.9462;SRR=179;TYPE=snp;ANN=…
chr5B	684248459	C	T	ALT1	REF	upstream_gene_variant	MODIFIER	TRIDC5BG077540	AB=0.244444;ABP=130.645;AC=19;AF=0.0833333;AN=228;AO=59;CIGAR=1X;DP=547;DPB=547;DPRA=3.01144;EPP=3.93042;EPPR=53.0076;GTI=5;LEN=1;MEANALT=1;MQM=65.6102;MQMR=66.2951;NS=57;NUMALT=1;ODDS=0.780796;PAIRED=1;PAIREDR=1;PAO=0;PQA=0;PQR=0;PRO=0;QA=2143;QR=17594;RO=488;RPL=33;RPP=4.81373;RPPR=85.3127;RPR=26;RUN=1;SAF=25;SAP=5.99147;SAR=34;SRF=207;SRP=27.3771;SRR=281;TYPE=snp;ANN=T
chr5B	684304277	C	A	ALT1	REF	intergenic_region	MODIFIER	TRIDC5BG077540-TRIDC5BG077550	AB=0.222222;ABP=9.04217;AC=19;AF=0.197917;AN=96;AO=12;CIGAR=1X;DP=62;DPB=62;DPRA=1.32558;EPP=14.5915;EPPR=24.0302;GTI=5;LEN=1;MEANALT=1;MQM=67.3333;MQMR=64.84;NS=24;NUMALT=1;ODDS=0.275157;PAIRED=1;PAIREDR=1;PAO=0;PQA=0;PQR=0;PRO=0;QA=477;QR=1892;RO=50;RPL=1;RPP=21.1059;RPPR=32.3686;RPR=11;RUN=1;SAF=11;SAP=21.1059;SAR=1;SRF=48;SRP=94.907;SRR=2;TYPE=snp;ANN=A
chr5B	684308184	T	G	ALT1	REF	downstream_gene_variant	MODIFIER	TRIDC5BG077550	AB=0.778182;ABP=187.854;AC=182;AF=0.8125;AN=224;AO=309;CIGAR=1X;DP=376;DPB=376;DPRA=4.2;EPP=40.4594;EPPR=62.9365;GTI=20;LEN=1;MEANALT=1;MQM=68.1812;MQMR=30.3134;NS=56;NUMALT=1;ODDS=0.391461;PAIRED=1;PAIREDR=1;PAO=0;PQA=0;PQR=0;PRO=0;QA=11167;QR=2475;RO=67;RPL=137;RPP=11.6189;RPPR=131.646;RPR=172;RUN=1;SAF=142;SAP=7.40244;SAR=167;SRF=57;SRP=74.6041;SRR=10;TYPE=snp;ANN=G
chr5B	684308250	C	T	REF	ALT1	downstream_gene_variant	MODIFIER	TRIDC5BG077550	AB=0.619171;ABP=50.6252;AC=194;AF=0.782258;AN=248;AO=456;CIGAR=1X;DP=637;DPB=637;DPRA=2.33036;EPP=30.5156;EPPR=4.74748;GTI=16;LEN=1;MEANALT=1.01786;MQM=66.9583;MQMR=56.2222;NS=62;NUMALT=1;ODDS=0.107042;PAIRED=1;PAIREDR=1;PAO=0;PQA=0;PQR=0;PRO=0;QA=16773;QR=6530;RO=180;RPL=197;RPP=21.3154;RPPR=8.84915;RPR=259;RUN=1;SAF=375;SAP=414.619;SAR=81;SRF=143;SRP=138.558;SRR=37;TYPE=snp;ANN=T
chr5B	684308299	GAA	GA	ALT1	REF	downstream_gene_variant	MODIFIER	TRIDC5BG077550	AB=0.647059;ABP=38.1371;AC=32;AF=0.125;AN=256;AO=134;CIGAR=1M1D1M;DP=827;DPB=792.333;DPRA=1.5369;EPP=13.9649;EPPR=3.62534;GTI=7;LEN=1;MEANALT=1;MQM=69.0224;MQMR=67.4249;NS=64;NUMALT=1;ODDS=0.0288334;PAIRED=1;PAIREDR=1;PAO=9;PQA=175.5;PQR=308.5;PRO=13;QA=4699;QR=25242;RO=692;RPL=71;RPP=4.04742;RPPR=56.0419;RPR=63;RUN=1;SAF=107;SAP=106.722;SAR=27;SRF=558;SRP=567.141;SRR=134;TYPE=del;ANN=GA
chr5B	684308435	C	T	REF	ALT1	downstream_gene_variant	MODIFIER	TRIDC5BG077550	AB=0.478261;ABP=3.57677;AC=202;AF=0.827869;AN=244;AO=464;CIGAR=1X;DP=572;DPB=572;DPRA=1.84091;EPP=20.9998;EPPR=8.15749;GTI=12;LEN=1;MEANALT=1;MQM=60.5905;MQMR=57.2593;NS=61;NUMALT=1;ODDS=0.360538;PAIRED=1;PAIREDR=1;PAO=0;PQA=0;PQR=0;PRO=0;QA=17399;QR=3937;RO=108;RPL=273;RPP=34.4779;RPPR=16.6021;RPR=191;RUN=1;SAF=38;SAP=707.541;SAR=426;SRF=9;SRP=165.871;SRR=99;TYPE=snp;ANN=T
chr5B	684308444	T	C	REF	ALT1	downstream_gene_variant	MODIFIER	TRIDC5BG077550	AB=0.496183;ABP=3.02688;AC=205;AF=0.826613;AN=248;AO=440;CIGAR=1X;DP=540;DPB=540;DPRA=2.02045;EPP=64.917;EPPR=8.56927;GTI=11;LEN=1;MEANALT=1;MQM=61.3386;MQMR=56.33;NS=62;NUMALT=1;ODDS=0.315463;PAIRED=1;PAIREDR=1;PAO=0;PQA=0;PQR=0;PRO=0;QA=16620;QR=3714;RO=100;RPL=269;RPP=50.4076;RPPR=13.5202;RPR=171;RUN=1;SAF=31;SAP=708.166;SAR=409;SRF=9;SRP=149.02;SRR=91;TYPE=snp;ANN=C
chr5B	684313155	A	G	ALT1	REF	5_prime_UTR_variant	MODIFIER	TRIDC5BG077550	AB=0.533333;ABP=3.58936;AC=32;AF=0.150943;AN=212;AO=53;CIGAR=1X;DP=342;DPB=342;DPRA=1.51724;EPP=5.01789;EPPR=18.2256;GTI=10;LEN=1;MEANALT=1;MQM=70;MQMR=69.9619;NS=53;NUMALT=1;ODDS=0.608588;PAIRED=1;PAIREDR=1;PAO=0;PQA=0;PQR=0;PRO=0;QA=1978;QR=10968;RO=289;RPL=19;RPP=12.2288;RPPR=47.5593;RPR=34;RUN=1;SAF=40;SAP=32.8783;SAR=13;SRF=194;SRP=76.6525;SRR=95;TYPE=snp;ANN=G
chr5B	684323527	G	A	ALT1	REF	downstream_gene_variant	MODIFIER	TRIDC5BG077560	AB=0.528302;ABP=3.37904;AC=31;AF=0.140909;AN=220;AO=39;CIGAR=1X;DP=235;DPB=235;DPRA=1.91293;EPP=5.73856;EPPR=4.35773;GTI=7;LEN=1;MEANALT=1;MQM=70;MQMR=70;NS=55;NUMALT=1;ODDS=0.130427;PAIRED=1;PAIREDR=1;PAO=0;PQA=0;PQR=0;PRO=0;QA=1391;QR=6890;RO=195;RPL=24;RPP=7.52028;RPPR=25.5602;RPR=15;RUN=1;SAF=32;SAP=37.8095;SAR=7;SRF=168;SRP=224.4;SRR=27;TYPE=snp;ANN=A
chr5B	684323564	A	G	ALT1	REF	downstream_gene_variant	MODIFIER	TRIDC5BG077560	AB=0.462963;ABP=3.6537;AC=31;AF=0.143519;AN=216;AO=42;CIGAR=1X;DP=274;DPB=274;DPRA=1.74877;EPP=13.1438;EPPR=24.5753;GTI=8;LEN=1;MEANALT=1;MQM=70;MQMR=70;NS=54;NUMALT=1;ODDS=1.7825;PAIRED=1;PAIREDR=1;PAO=0;PQA=0;PQR=0;PRO=0;QA=1511;QR=8214;RO=232;RPL=22;RPP=3.21711;RPPR=12.5947;RPR=20;RUN=1;SAF=24;SAP=4.87156;SAR=18;SRF=164;SRP=89.2702;SRR=68;TYPE=snp;ANN=G
chr5B	684326784	GC	AC	REF	ALT1	5_prime_UTR_variant	MODIFIER	TRIDC5BG077560	AB=0.518519;ABP=3.17115;AC=185;AF=0.872642;AN=212;AO=243;CIGAR=1X1M;DP=280;DPB=280;DPRA=2.54735;EPP=11.5979;EPPR=6.05036;GTI=7;LEN=1;MEANALT=1;MQM=67.893;MQMR=70;NS=53;NUMALT=1;ODDS=2.22977;PAIRED=1;PAIREDR=1;PAO=0;PQA=0;PQR=0;PRO=0;QA=8496;QR=1276;RO=35;RPL=163;RPP=64.5711;RPPR=13.4954;RPR=80;RUN=1;SAF=26;SAP=329.008;SAR=217;SRF=3;SRP=55.1877;SRR=32;TYPE=snp;ANN=AC
chr5B	684327314	G	A	REF	ALT1	missense_variant	MODERATE	TRIDC5BG077560	AB=0.25;ABP=5.18177;AC=105;AF=0.875;AN=120;AO=40;CIGAR=1X;DP=47;DPB=47;DPRA=1.19444;EPP=81.4005;EPPR=18.2106;GTI=3;LEN=1;MEANALT=1;MQM=70;MQMR=70;NS=30;NUMALT=1;ODDS=0.0597449;PAIRED=1;PAIREDR=1;PAO=0;PQA=0;PQR=0;PRO=0;QA=1428;QR=263;RO=7;RPL=0;RPP=89.8692;RPPR=18.2106;RPR=40;RUN=1;SAF=39;SAP=81.4005;SAR=1;SRF=7;SRP=18.2106;SRR=0;TYPE=snp;ANN=A
chr5B	684327335	C	A	ALT1	REF	missense_variant	MODERATE	TRIDC5BG077560	AB=0.428571;ABP=4.25114;AC=31;AF=0.143519;AN=216;AO=23;CIGAR=1X;DP=223;DPB=223;DPRA=0.932609;EPP=37.093;EPPR=401.088;GTI=9;LEN=1;MEANALT=1;MQM=70;MQMR=70;NS=54;NUMALT=1;ODDS=0.337906;PAIRED=1;PAIREDR=1;PAO=0;PQA=0;PQR=0;PRO=0;QA=841;QR=7297;RO=199;RPL=1;RPP=44.6459;RPPR=435.133;RPR=22;RUN=1;SAF=22;SAP=44.6459;SAR=1;SRF=195;SRP=401.088;SRR=4;TYPE=snp;ANN=A
chr5B	684327374	A	G	REF	ALT1	upstream_gene_variant	MODIFIER	TRIDC5BG077560	AB=0.530864;ABP=3.68051;AC=215;AF=0.866935;AN=248;AO=405;CIGAR=1X;DP=492;DPB=492;DPRA=0.968659;EPP=38.1882;EPPR=44.9671;GTI=12;LEN=1;MEANALT=1;MQM=70;MQMR=70;NS=62;NUMALT=1;ODDS=0.245359;PAIRED=1;PAIREDR=1;PAO=0;PQA=0;PQR=0;PRO=0;QA=14969;QR=3207;RO=87;RPL=137;RPP=95.0218;RPPR=67.9298;RPR=268;RUN=1;SAF=376;SAP=648.602;SAR=29;SRF=82;SRP=150.995;SRR=5;TYPE=snp;ANN=G
chr5B	684327404	GGGAA	AGGAG	REF	ALT1	upstream_gene_variant	MODIFIER	TRIDC5BG077560	AB=0.459016;ABP=4.7902;AC=216;AF=0.870968;AN=248;AO=502;CIGAR=1X3M1X;DP=637;DPB=642.6;DPRA=0.8283;EPP=116.532;EPPR=12.0553;GTI=11;LEN=5;MEANALT=1.07018;MQM=70;MQMR=70;NS=62;NUMALT=1;ODDS=0.073413;PAIRED=1;PAIREDR=1;PAO=0;PQA=0;PQR=174.5;PRO=7;QA=16883;QR=4278;RO=127;RPL=271;RPP=9.93133;RPPR=4.39525;RPR=231;RUN=1;SAF=407;SAP=424.086;SAR=95;SRF=101;SRP=99.1877;SRR=26;TYPE=complex;ANN=AGGAG
chr5B	684327511	A	G	ALT1	REF	upstream_gene_variant	MODIFIER	TRIDC5BG077560	AB=0.487603;ABP=3.17181;AC=32;AF=0.126984;AN=252;AO=144;CIGAR=1X;DP=907;DPB=907;DPRA=1.55749;EPP=22.5536;EPPR=59.591;GTI=5;LEN=1;MEANALT=1;MQM=70;MQMR=70;NS=63;NUMALT=1;ODDS=0.134706;PAIRED=1;PAIREDR=1;PAO=0;PQA=0;PQR=0;PRO=0;QA=5289;QR=27636;RO=763;RPL=67;RPP=4.51827;RPPR=10.4127;RPR=77;RUN=1;SAF=51;SAP=29.6108;SAR=93;SRF=324;SRP=40.6482;SRR=439;TYPE=snp;ANN=G
chr5B	684327849	AAATA	AA	ALT1	REF	upstream_gene_variant	MODIFIER	TRIDC5BG077560	AB=0;ABP=0;AC=16;AF=0.307692;AN=52;AO=5;CIGAR=1M3D1M;DP=15;DPB=12.8;DPRA=1.125;EPP=6.91895;EPPR=6.48466;GTI=3;LEN=3;MEANALT=1;MQM=70;MQMR=70;NS=13;NUMALT=1;ODDS=2.6776;PAIRED=1;PAIREDR=1;PAO=0;PQA=0;PQR=35;PRO=1;QA=179;QR=367;RO=10;RPL=3;RPP=3.44459;RPPR=3.87889;RPR=2;RUN=1;SAF=2;SAP=3.44459;SAR=3;SRF=3;SRP=6.48466;SRR=7;TYPE=del;ANN=AA
chr5B	684396705	T	C	REF	ALT1	intergenic_region	MODIFIER	TRIDC5BG077560-TRIDC5BG077570	AB=0;ABP=0;AC=12;AF=0.75;AN=16;AO=4;CIGAR=1X;DP=5;DPB=5;DPRA=1.33333;EPP=3.0103;EPPR=5.18177;GTI=0;LEN=1;MEANALT=1;MQM=33.25;MQMR=24;NS=4;NUMALT=1;ODDS=4.51572;PAIRED=1;PAIREDR=1;PAO=0;PQA=0;PQR=0;PRO=0;QA=147;QR=38;RO=1;RPL=3;RPP=5.18177;RPPR=5.18177;RPR=1;RUN=1;SAF=3;SAP=5.18177;SAR=1;SRF=1;SRP=5.18177;SRR=0;TYPE=snp;ANN=C
chr5B	684396731	T	C	ALT1	REF	intergenic_region	MODIFIER	TRIDC5BG077560-TRIDC5BG077570	AB=0;ABP=0;AC=16;AF=0.5;AN=32;AO=5;CIGAR=1X;DP=10;DPB=10;DPRA=1;EPP=6.91895;EPPR=3.44459;GTI=3;LEN=1;MEANALT=1;MQM=18.8;MQMR=31;NS=8;NUMALT=1;ODDS=5.45276;PAIRED=1;PAIREDR=1;PAO=0;PQA=0;PQR=0;PRO=0;QA=179;QR=180;RO=5;RPL=2;RPP=3.44459;RPPR=6.91895;RPR=3;RUN=1;SAF=3;SAP=3.44459;SAR=2;SRF=1;SRP=6.91895;SRR=4;TYPE=snp;ANN=C
chr5B	684460232	C	T	ALT1	REF	intergenic_region	MODIFIER	TRIDC5BG077570-TRIDC5BG077590	AB=0.509804;ABP=3.05288;AC=21;AF=0.102941;AN=204;AO=33;CIGAR=1X;DP=244;DPB=244;DPRA=1.96006;EPP=3.0761;EPPR=16.4114;GTI=6;LEN=1;MEANALT=1.14286;MQM=61.3939;MQMR=57.2;NS=51;NUMALT=1;ODDS=1.25933;PAIRED=1;PAIREDR=1;PAO=0;PQA=0;PQR=0;PRO=0;QA=1225;QR=7751;RO=210;RPL=13;RPP=6.23461;RPPR=110.591;RPR=20;RUN=1;SAF=29;SAP=44.1367;SAR=4;SRF=177;SRP=217.428;SRR=33;TYPE=snp;ANN=T
chr5B	684461281	G	A	ALT1	REF	upstream_gene_variant	MODIFIER	TRIDC5BG077590	AB=0.325843;ABP=26.4573;AC=31;AF=0.123016;AN=252;AO=61;CIGAR=1X;DP=568;DPB=568;DPRA=1.27964;EPP=3.0459;EPPR=6.62655;GTI=8;LEN=1;MEANALT=1;MQM=54.4262;MQMR=54.5287;NS=63;NUMALT=1;ODDS=0.24941;PAIRED=1;PAIREDR=1;PAO=0;PQA=0;PQR=0;PRO=0;QA=2227;QR=18814;RO=505;RPL=32;RPP=3.33068;RPPR=13.3345;RPR=29;RUN=1;SAF=25;SAP=7.31765;SAR=36;SRF=207;SRP=38.6181;SRR=298;TYPE=snp;ANN=A
chr5B	684462361	G	A	REF	ALT1	upstream_gene_variant	MODIFIER	TRIDC5BG077590	AB=0.481481;ABP=3.41242;AC=210;AF=0.846774;AN=248;AO=379;CIGAR=1X;DP=480;DPB=480;DPRA=1.90909;EPP=21.6254;EPPR=29.3475;GTI=11;LEN=1;MEANALT=1;MQM=49.6306;MQMR=46.5644;NS=62;NUMALT=1;ODDS=0.0865684;PAIRED=1;PAIREDR=1;PAO=0;PQA=0;PQR=0;PRO=0;QA=14186;QR=3766;RO=101;RPL=220;RPP=24.3297;RPPR=3.0318;RPR=159;RUN=1;SAF=125;SAP=98.3546;SAR=254;SRF=35;SRP=23.6715;SRR=66;TYPE=snp;ANN=A
chr5B	684462667	C	T	ALT1	REF	upstream_gene_variant	MODIFIER	TRIDC5BG077590	AB=0.436508;ABP=7.42218;AC=30;AF=0.122951;AN=244;AO=75;CIGAR=1X;DP=603;DPB=603;DPRA=2.27482;EPP=15.7786;EPPR=52.7732;GTI=9;LEN=1;MEANALT=1;MQM=64.7867;MQMR=63.4394;NS=61;NUMALT=1;ODDS=0.305124;PAIRED=1;PAIREDR=1;PAO=0;PQA=0;PQR=0;PRO=0;QA=2775;QR=19577;RO=528;RPL=41;RPP=4.429;RPPR=15.0027;RPR=34;RUN=1;SAF=22;SAP=30.8341;SAR=53;SRF=190;SRP=93.0935;SRR=338;TYPE=snp;ANN=T
chr5B	684462839	A	G	REF	ALT1	upstream_gene_variant	MODIFIER	TRIDC5BG077590	AB=0.477157;ABP=3.90314;AC=126;AF=0.533898;AN=236;AO=178;CIGAR=1X;DP=387;DPB=387;DPRA=1.57624;EPP=33.5085;EPPR=67.8532;GTI=26;LEN=1;MEANALT=1;MQM=63.1798;MQMR=55.0574;NS=59;NUMALT=1;ODDS=0.0980434;PAIRED=1;PAIREDR=1;PAO=0;PQA=0;PQR=0;PRO=0;QA=6650;QR=7859;RO=209;RPL=66;RPP=28.824;RPPR=58.3777;RPR=112;RUN=1;SAF=142;SAP=140.081;SAR=36;SRF=144;SRP=67.8532;SRR=65;TYPE=snp;ANN=G
chr5B	684471899	ACCCCCCA	AACCCCTA,ACCCCCCCA,ACCCACCA	ALT1	REF	downstream_gene_variant	MODIFIER	TRIDC5BG077590	AB=0.5,0,0.545455;ABP=3.0103,0,3.20771;AC=27,9,29;AF=0.259615,0.0865385,0.278846;AN=104;AO=7,3,13;CIGAR=1M1X4M1X1M,1M1I7M,4M1X3M;DP=47;DPB=58.625;DPRA=1.04762,3.375,1.87778;EPP=5.80219,3.73412,3.17734;EPPR=8.59409;GTI=21;LEN=8,1,1;MEANALT=1.5,2.5,1.6;MQM=16.4286,16,26.3846;MQMR=59.4286;NS=26;NUMALT=3;ODDS=6.32365;PAIRED=1,1,1;PAIREDR=1;PAO=1.75,5.91667,1.41667;PQA=38.5,185.833,43.8333;PQR=185.833…
chr5B	684471932	A	G	ALT1	REF	downstream_gene_variant	MODIFIER	TRIDC5BG077590	AB=0.529412;ABP=3.13803;AC=70;AF=0.673077;AN=104;AO=32;CIGAR=1X;DP=47;DPB=47;DPRA=2.10526;EPP=7.35324;EPPR=6.62942;GTI=9;LEN=1;MEANALT=1;MQM=25.8438;MQMR=69;NS=26;NUMALT=1;ODDS=1.14112;PAIRED=1;PAIREDR=1;PAO=0;PQA=0;PQR=0;PRO=0;QA=1175;QR=538;RO=15;RPL=11;RPP=9.79615;RPPR=14.7363;RPR=21;RUN=1;SAF=9;SAP=16.3106;SAR=23;SRF=8;SRP=3.15506;SRR=7;TYPE=snp;ANN=G
chr5B	684471974	G	A	REF	ALT1	downstream_gene_variant	MODIFIER	TRIDC5BG077590	AB=0.4;ABP=4.74748;AC=25;AF=0.25;AN=100;AO=12;CIGAR=1X;DP=62;DPB=62;DPRA=1.2012;EPP=3.73412;EPPR=3.70517;GTI=15;LEN=1;MEANALT=1;MQM=47.8333;MQMR=44.1;NS=25;NUMALT=1;ODDS=0.146562;PAIRED=1;PAIREDR=1;PAO=0;PQA=0;PQR=0;PRO=0;QA=439;QR=1898;RO=50;RPL=4;RPP=5.9056;RPPR=3.18402;RPR=8;RUN=1;SAF=7;SAP=3.73412;SAR=5;SRF=13;SRP=28.0257;SRR=37;TYPE=snp;ANN=A
chr5B	684472003	AA	TT	ALT1	REF	downstream_gene_variant	MODIFIER	TRIDC5BG077590	AB=0.322581;ABP=11.486;AC=23;AF=0.221154;AN=104;AO=14;CIGAR=2X;DP=58;DPB=58;DPRA=2.43478;EPP=3.0103;EPPR=9.12072;GTI=8;LEN=2;MEANALT=1;MQM=41.4286;MQMR=50.2558;NS=26;NUMALT=1;ODDS=0.368139;PAIRED=1;PAIREDR=1;PAO=0;PQA=0;PQR=0;PRO=0;QA=521;QR=1567;RO=43;RPL=11;RPP=12.937;RPPR=3.46479;RPR=3;RUN=1;SAF=6;SAP=3.63072;SAR=8;SRF=13;SRP=17.6046;SRR=30;TYPE=mnp;ANN=TT
chr5B	684472015	ATCCATCA	AACCGTCC,GACCGTCC,AACCATCA	ALT3	ALT2	downstream_gene_variant	MODIFIER	TRIDC5BG077590	AB=0.25,0.4,0.36;ABP=9.52472,4.74748,7.26639;AC=10,19,26;AF=0.113636,0.215909,0.295455;AN=88;AO=5,11,16;CIGAR=1M1X2M1X2M1X,2X2M1X2M1X,1M1X6M;DP=48;DPB=50.875;DPRA=2.33333,2.13571,2.4;EPP=3.44459,4.78696,3.55317;EPPR=5.18177;GTI=26;LEN=8,8,1;MEANALT=2,1.85714,1.6;MQM=34.8,53.3636,36.75;MQMR=69.3125;NS=22;NUMALT=3;ODDS=1.47667;PAIRED=1,1,1;PAIREDR=1;PAO=0.333333,0,1.33333;PQA=11.6667,0,43.1667;PQR=…
chr5B	684472028	CGAACGT	GGACCGA,CGACTGT	ALT2	ALT1	downstream_gene_variant	MODIFIER	TRIDC5BG077590	AB=0.692308,0.307692;ABP=7.18621,7.18621;AC=29,26;AF=0.302083,0.270833;AN=96;AO=16,11;CIGAR=1X2M1X2M1X,3M2X2M;DP=39;DPB=42.8571;DPRA=1.83007,1.83007;EPP=3.55317,3.20771;EPPR=9.52472;GTI=25;LEN=7,2;MEANALT=1.33333,1.33333;MQM=47.5625,42.4545;MQMR=69.0833;NS=24;NUMALT=2;ODDS=0.159236;PAIRED=1,1;PAIREDR=1;PAO=0,4;PQA=0,129;PQR=162;PRO=5;QA=548,357;QR=431;RO=12;RPL=9,5;RPP=3.55317,3.20771;RPPR=3.7341…
chr5B	684472035	AC	AA	ALT1	REF	downstream_gene_variant	MODIFIER	TRIDC5BG077590	AB=0.375;ABP=4.09604;AC=9;AF=0.09375;AN=96;AO=5;CIGAR=1M1X;DP=42;DPB=42;DPRA=1.5625;EPP=13.8677;EPPR=7.76406;GTI=4;LEN=1;MEANALT=1;MQM=36.6;MQMR=55.2973;NS=24;NUMALT=1;ODDS=5.39851;PAIRED=1;PAIREDR=1;PAO=0;PQA=0;PQR=0;PRO=0;QA=169;QR=1325;RO=37;RPL=2;RPP=3.44459;RPPR=3.06899;RPR=3;RUN=1;SAF=2;SAP=3.44459;SAR=3;SRF=11;SRP=16.2152;SRR=26;TYPE=snp;ANN=AA
chr5B	684472067	C	T	ALT1	REF	downstream_gene_variant	MODIFIER	TRIDC5BG077590	AB=0.375;ABP=4.09604;AC=25;AF=0.271739;AN=92;AO=9;CIGAR=1X;DP=35;DPB=35;DPRA=1.25;EPP=3.25157;EPPR=7.26639;GTI=14;LEN=1;MEANALT=1;MQM=41.5556;MQMR=59.24;NS=23;NUMALT=1;ODDS=1.12138;PAIRED=1;PAIREDR=1;PAO=0;PQA=0;PQR=0;PRO=0;QA=346;QR=924;RO=25;RPL=5;RPP=3.25157;RPPR=3.79203;RPR=4;RUN=1;SAF=3;SAP=5.18177;SAR=6;SRF=8;SRP=10.0459;SRR=17;TYPE=snp;ANN=T
chr5B	684472081	C	T	ALT1	REF	downstream_gene_variant	MODIFIER	TRIDC5BG077590	AB=0.5;ABP=3.0103;AC=26;AF=0.270833;AN=96;AO=11;CIGAR=1X;DP=36;DPB=36;DPRA=1.42857;EPP=7.94546;EPPR=10.0459;GTI=9;LEN=1;MEANALT=1;MQM=44.1818;MQMR=60.88;NS=24;NUMALT=1;ODDS=0.139668;PAIRED=1;PAIREDR=1;PAO=0;PQA=0;PQR=0;PRO=0;QA=405;QR=932;RO=25;RPL=6;RPP=3.20771;RPPR=13.5202;RPR=5;RUN=1;SAF=3;SAP=7.94546;SAR=8;SRF=9;SRP=7.26639;SRR=16;TYPE=snp;ANN=T
chr5B	684472090	C	T	REF	ALT1	downstream_gene_variant	MODIFIER	TRIDC5BG077590	AB=0.428571;ABP=3.32051;AC=33;AF=0.375;AN=88;AO=11;CIGAR=1X;DP=31;DPB=31;DPRA=1.125;EPP=3.20771;EPPR=4.74748;GTI=9;LEN=1;MEANALT=1;MQM=70;MQMR=49.7;NS=22;NUMALT=1;ODDS=23.0808;PAIRED=1;PAIREDR=1;PAO=0;PQA=0;PQR=0;PRO=0;QA=396;QR=723;RO=20;RPL=8;RPP=7.94546;RPPR=4.74748;RPR=3;RUN=1;SAF=6;SAP=3.20771;SAR=5;SRF=6;SRP=9.95901;SRR=14;TYPE=snp;ANN=T
chr5B	684472099	C	T	ALT1	REF	downstream_gene_variant	MODIFIER	TRIDC5BG077590	AB=0.571429;ABP=3.32051;AC=27;AF=0.375;AN=72;AO=11;CIGAR=1X;DP=26;DPB=26;DPRA=1.45833;EPP=7.94546;EPPR=4.31318;GTI=16;LEN=1;MEANALT=1;MQM=49.7273;MQMR=62.6;NS=18;NUMALT=1;ODDS=0.0296345;PAIRED=1;PAIREDR=1;PAO=0;PQA=0;PQR=0;PRO=0;QA=380;QR=570;RO=15;RPL=5;RPP=3.20771;RPPR=6.62942;RPR=6;RUN=1;SAF=2;SAP=12.6832;SAR=9;SRF=7;SRP=3.15506;SRR=8;TYPE=snp;ANN=T
chr5B	684483030	G	T	REF	ALT1	downstream_gene_variant	MODIFIER	TRIDC5BG077600	AB=0.46875;ABP=3.28173;AC=80;AF=0.8;AN=100;AO=82;CIGAR=1X;DP=107;DPB=107;DPRA=2.35714;EPP=20.9117;EPPR=3.79203;GTI=5;LEN=1;MEANALT=1;MQM=68.3171;MQMR=69.12;NS=25;NUMALT=1;ODDS=1.86319;PAIRED=1;PAIREDR=1;PAO=0;PQA=0;PQR=0;PRO=0;QA=2975;QR=926;RO=25;RPL=45;RPP=4.70511;RPPR=10.0459;RPR=37;RUN=1;SAF=57;SAP=30.1272;SAR=25;SRF=15;SRP=5.18177;SRR=10;TYPE=snp;ANN=T
chr5B	684483078	G	A	REF	ALT1	downstream_gene_variant	MODIFIER	TRIDC5BG077600	AB=0.545455;ABP=3.99733;AC=82;AF=0.759259;AN=108;AO=84;CIGAR=1X;DP=118;DPB=118;DPRA=2.75253;EPP=5.59539;EPPR=4.03217;GTI=7;LEN=1;MEANALT=1;MQM=69.2738;MQMR=70;NS=27;NUMALT=1;ODDS=2.72143;PAIRED=1;PAIREDR=1;PAO=0;PQA=0;PQR=0;PRO=0;QA=3087;QR=1236;RO=34;RPL=41;RPP=3.1137;RPPR=3.26577;RPR=43;RUN=1;SAF=54;SAP=17.9004;SAR=30;SRF=17;SRP=3.0103;SRR=17;TYPE=snp;ANN=A
chr5B	684483097	ATTTTTTC	ATTTTTTTC	REF	ALT1	downstream_gene_variant	MODIFIER	TRIDC5BG077600	AB=0.568627;ABP=5.09662;AC=74;AF=0.770833;AN=96;AO=87;CIGAR=1M1I7M;DP=117;DPB=135.5;DPRA=2.725;EPP=10.2236;EPPR=13.4334;GTI=6;LEN=1;MEANALT=1;MQM=69.1264;MQMR=70;NS=24;NUMALT=1;ODDS=2.49548;PAIRED=1;PAIREDR=1;PAO=3.5;PQA=120;PQR=120;PRO=3.5;QA=3040;QR=1073;RO=30;RPL=46;RPP=3.63429;RPPR=3.29983;RPR=41;RUN=1;SAF=53;SAP=12.0207;SAR=34;SRF=15;SRP=3.0103;SRR=15;TYPE=ins;ANN=ATTTTTTTC
chr5B	684485875	A	T	REF	ALT1	3_prime_UTR_variant	MODIFIER	TRIDC5BG077600	AB=0.645161;ABP=8.68415;AC=125;AF=0.801282;AN=156;AO=90;CIGAR=1X;DP=115;DPB=115;DPRA=1.57812;EPP=16.9077;EPPR=13.5202;GTI=8;LEN=1;MEANALT=1;MQM=70;MQMR=67.84;NS=39;NUMALT=1;ODDS=1.76314;PAIRED=1;PAIREDR=1;PAO=0;PQA=0;PQR=0;PRO=0;QA=3282;QR=890;RO=25;RPL=47;RPP=3.39634;RPPR=3.09716;RPR=43;RUN=1;SAF=36;SAP=10.8276;SAR=54;SRF=8;SRP=10.0459;SRR=17;TYPE=snp;ANN=T
chr5B	684485888	CAACG	AAACA	ALT1	REF	3_prime_UTR_variant	MODIFIER	TRIDC5BG077600	AB=0.230769;ABP=19.3799;AC=26;AF=0.175676;AN=148;AO=17;CIGAR=1X3M1X;DP=113;DPB=114.2;DPRA=1.7648;EPP=3.13803;EPPR=10.339;GTI=6;LEN=5;MEANALT=1;MQM=66.8235;MQMR=70;NS=37;NUMALT=1;ODDS=0.57567;PAIRED=1;PAIREDR=1;PAO=0;PQA=0;PQR=59;PRO=2;QA=593;QR=3378;RO=96;RPL=12;RPP=9.26925;RPPR=18.3011;RPR=5;RUN=1;SAF=3;SAP=18.4661;SAR=14;SRF=30;SRP=32.3252;SRR=66;TYPE=complex;ANN=AAACA
chr5B	684485914	GC	AG	ALT1	REF	3_prime_UTR_variant	MODIFIER	TRIDC5BG077600	AB=0.305556;ABP=14.8328;AC=23;AF=0.191667;AN=120;AO=19;CIGAR=2X;DP=107;DPB=107.5;DPRA=2.29478;EPP=5.8675;EPPR=14.0174;GTI=6;LEN=2;MEANALT=1.14286;MQM=70;MQMR=70;NS=30;NUMALT=1;ODDS=2.39653;PAIRED=1;PAIREDR=1;PAO=0;PQA=0;PQR=34;PRO=1;QA=699;QR=3131;RO=87;RPL=13;RPP=8.61041;RPPR=3.63429;RPR=6;RUN=1;SAF=1;SAP=36.0395;SAR=18;SRF=13;SRP=95.8844;SRR=74;TYPE=mnp;ANN=AG
chr5B	684487782	T	C	ALT1	REF	synonymous_variant	LOW	TRIDC5BG077600	AB=0.190476;ABP=37.9607;AC=14;AF=0.0686275;AN=204;AO=14;CIGAR=1X;DP=229;DPB=229;DPRA=2.43978;EPP=3.63072;EPPR=5.28277;GTI=4;LEN=1;MEANALT=1;MQM=60.5;MQMR=70;NS=51;NUMALT=1;ODDS=2.99317;PAIRED=1;PAIREDR=1;PAO=0;PQA=0;PQR=0;PRO=0;QA=549;QR=8157;RO=215;RPL=7;RPP=3.0103;RPPR=18.3722;RPR=7;RUN=1;SAF=11;SAP=12.937;SAR=3;SRF=54;SRP=118.644;SRR=161;TYPE=snp;ANN=C
chr5B	684487816	A	C	ALT1	REF	upstream_gene_variant	MODIFIER	TRIDC5BG077610	AB=0.36;ABP=7.26639;AC=15;AF=0.075;AN=200;AO=19;CIGAR=1X;DP=193;DPB=193;DPRA=1.99367;EPP=28.7251;EPPR=3.06022;GTI=4;LEN=1;MEANALT=1;MQM=63;MQMR=70;NS=50;NUMALT=1;ODDS=2.92298;PAIRED=1;PAIREDR=1;PAO=0;PQA=0;PQR=0;PRO=0;QA=708;QR=6604;RO=174;RPL=12;RPP=5.8675;RPPR=19.184;RPR=7;RUN=1;SAF=10;SAP=3.12459;SAR=9;SRF=45;SRP=91.0673;SRR=129;TYPE=snp;ANN=C
chr5B	684487829	AT	GG	ALT1	REF	upstream_gene_variant	MODIFIER	TRIDC5BG077610	AB=0.263158;ABP=12.2676;AC=14;AF=0.0744681;AN=188;AO=14;CIGAR=2X;DP=171;DPB=173;DPRA=1.64476;EPP=18.5208;EPPR=7.00747;GTI=3;LEN=2;MEANALT=1;MQM=64.8571;MQMR=70;NS=47;NUMALT=1;ODDS=0.595473;PAIRED=1;PAIREDR=1;PAO=0;PQA=0;PQR=45;PRO=2;QA=527;QR=5886;RO=157;RPL=7;RPP=3.0103;RPPR=9.10979;RPR=7;RUN=1;SAF=5;SAP=5.49198;SAR=9;SRF=40;SRP=85.0145;SRR=117;TYPE=mnp;ANN=GG
chr5B	684487841	C	A	ALT1	REF	upstream_gene_variant	MODIFIER	TRIDC5BG077610	AB=0.277778;ABP=10.7311;AC=14;AF=0.0744681;AN=188;AO=14;CIGAR=1X;DP=151;DPB=151;DPRA=1.82903;EPP=5.49198;EPPR=18.2423;GTI=3;LEN=1;MEANALT=1;MQM=64.8571;MQMR=70;NS=47;NUMALT=1;ODDS=0.235948;PAIRED=1;PAIREDR=1;PAO=0;PQA=0;PQR=0;PRO=0;QA=526;QR=5233;RO=137;RPL=9;RPP=5.49198;RPPR=7.591;RPR=5;RUN=1;SAF=4;SAP=8.59409;SAR=10;SRF=33;SRP=82.911;SRR=104;TYPE=snp;ANN=A
chr5B	684487860	C	G	ALT1	REF	upstream_gene_variant	MODIFIER	TRIDC5BG077610	AB=0.214286;ABP=12.937;AC=14;AF=0.076087;AN=184;AO=9;CIGAR=1X;DP=125;DPB=125;DPRA=1.5619;EPP=9.04217;EPPR=56.0509;GTI=4;LEN=1;MEANALT=1;MQM=68.1111;MQMR=70;NS=46;NUMALT=1;ODDS=0.35551;PAIRED=1;PAIREDR=1;PAO=0;PQA=0;PQR=0;PRO=0;QA=356;QR=4428;RO=115;RPL=7;RPP=9.04217;RPPR=12.9991;RPR=2;RUN=1;SAF=0;SAP=22.5536;SAR=9;SRF=35;SRP=41.2471;SRR=80;TYPE=snp;ANN=G
chr5B	684488519	C	T	ALT1	REF	upstream_gene_variant	MODIFIER	TRIDC5BG077610	AB=0.52;ABP=3.09716;AC=32;AF=0.145455;AN=220;AO=29;CIGAR=1X;DP=216;DPB=216;DPRA=1.05429;EPP=30.0414;EPPR=80.0213;GTI=9;LEN=1;MEANALT=1.1;MQM=65.4138;MQMR=70;NS=55;NUMALT=1;ODDS=0.765137;PAIRED=1;PAIREDR=1;PAO=0;PQA=0;PQR=0;PRO=0;QA=1063;QR=6916;RO=185;RPL=5;RPP=30.0414;RPPR=83.8712;RPR=24;RUN=1;SAF=29;SAP=65.983;SAR=0;SRF=176;SRP=330.363;SRR=9;TYPE=snp;ANN=T
chr5B	684488531	GATG	AATA	ALT1	REF	upstream_gene_variant	MODIFIER	TRIDC5BG077610	AB=0.5625;ABP=4.09604;AC=34;AF=0.137097;AN=248;AO=43;CIGAR=1X2M1X;DP=319;DPB=336.75;DPRA=1.00867;EPP=25.2805;EPPR=159.996;GTI=9;LEN=4;MEANALT=1;MQM=61.6977;MQMR=70;NS=62;NUMALT=1;ODDS=1.17562;PAIRED=1;PAIREDR=1;PAO=0;PQA=0;PQR=738;PRO=29;QA=1568;QR=10241;RO=275;RPL=9;RPP=34.5724;RPPR=207.689;RPR=34;RUN=1;SAF=41;SAP=79.8198;SAR=2;SRF=259;SRP=469.277;SRR=16;TYPE=complex;ANN=AATA
chr5B	684488541	T	A	ALT1	REF	upstream_gene_variant	MODIFIER	TRIDC5BG077610	AB=0.5;ABP=3.0103;AC=35;AF=0.138889;AN=252;AO=49;CIGAR=1X;DP=389;DPB=389;DPRA=0.932602;EPP=22.5536;EPPR=166.509;GTI=9;LEN=1;MEANALT=1;MQM=60.1633;MQMR=70;NS=63;NUMALT=1;ODDS=1.46386;PAIRED=1;PAIREDR=1;PAO=0;PQA=0;PQR=0;PRO=0;QA=1871;QR=12967;RO=340;RPL=12;RPP=30.7077;RPPR=233.57;RPR=37;RUN=1;SAF=47;SAP=92.7497;SAR=2;SRF=321;SRP=585.501;SRR=19;TYPE=snp;ANN=A
chr5B	684488586	C	T	ALT1	REF	synonymous_variant	LOW	TRIDC5BG077600	AB=0.46988;ABP=3.66436;AC=35;AF=0.136719;AN=256;AO=109;CIGAR=1X;DP=791;DPB=791;DPRA=1.03918;EPP=5.42083;EPPR=17.733;GTI=10;LEN=1;MEANALT=1;MQM=57.1376;MQMR=70;NS=64;NUMALT=1;ODDS=0.148954;PAIRED=1;PAIREDR=1;PAO=0;PQA=0;PQR=0;PRO=0;QA=4177;QR=26142;RO=682;RPL=36;RPP=30.2832;RPPR=130.369;RPR=73;RUN=1;SAF=92;SAP=115.07;SAR=17;SRF=590;SRP=792.649;SRR=92;TYPE=snp;ANN=T
chr5B	684488613	A	G	ALT1	REF	synonymous_variant	LOW	TRIDC5BG077600	AB=0.333333;ABP=25.4488;AC=36;AF=0.140625;AN=256;AO=132;CIGAR=1X;DP=1062;DPB=1062;DPRA=0.974625;EPP=3.27351;EPPR=9.08996;GTI=10;LEN=1;MEANALT=1.08333;MQM=56.8106;MQMR=69.9935;NS=64;NUMALT=1;ODDS=0.379767;PAIRED=1;PAIREDR=1;PAO=0;PQA=0;PQR=0;PRO=0;QA=4940;QR=34761;RO=929;RPL=51;RPP=17.8158;RPPR=150.271;RPR=81;RUN=1;SAF=103;SAP=93.0935;SAR=29;SRF=708;SRP=557.376;SRR=221;TYPE=snp;ANN=G
chr5B	684488682	C	T	ALT1	REF	synonymous_variant	LOW	TRIDC5BG077600	AB=0.726562;ABP=60.0793;AC=30;AF=0.117188;AN=256;AO=173;CIGAR=1X;DP=1238;DPB=1238;DPRA=1.11705;EPP=38.2685;EPPR=236.166;GTI=5;LEN=1;MEANALT=1;MQM=62.4624;MQMR=70;NS=64;NUMALT=1;ODDS=0.185832;PAIRED=1;PAIREDR=1;PAO=0;PQA=0;PQR=0;PRO=0;QA=6319;QR=38954;RO=1064;RPL=76;RPP=8.54567;RPPR=3.04295;RPR=97;RUN=1;SAF=70;SAP=16.6793;SAR=103;SRF=453;SRP=53.9583;SRR=611;TYPE=snp;ANN=T
chr5B	684488799	GAAAAAAAAT	GAAAATAAAAAT	ALT1	REF	upstream_gene_variant	MODIFIER	TRIDC5BG077610	AB=0.733333;ABP=24.2907;AC=31;AF=0.123016;AN=252;AO=55;CIGAR=4M2I6M;DP=351;DPB=383.4;DPRA=1.4417;EPP=11.8936;EPPR=24.9965;GTI=5;LEN=2;MEANALT=1.11111;MQM=70;MQMR=70;NS=63;NUMALT=1;ODDS=5.81215;PAIRED=1;PAIREDR=1;PAO=11.3333;PQA=375.333;PQR=627.833;PRO=18.8333;QA=2016;QR=10754;RO=288;RPL=38;RPP=20.4216;RPPR=72.4974;RPR=17;RUN=1;SAF=7;SAP=69.3784;SAR=48;SRF=21;SRP=459.291;SRR=267;TYPE=ins;ANN=GAAAA…
chr5B	684489037	CAA	CAAA	ALT1	REF	upstream_gene_variant	MODIFIER	TRIDC5BG077610	AB=0.612903;ABP=9.87495;AC=34;AF=0.134921;AN=252;AO=94;CIGAR=1M1I2M;DP=542;DPB=581.667;DPRA=1.31561;EPP=23.801;EPPR=52.5655;GTI=9;LEN=1;MEANALT=1;MQM=70;MQMR=70;NS=63;NUMALT=1;ODDS=0.722824;PAIRED=1;PAIREDR=1;PAO=10;PQA=181.5;PQR=181.5;PRO=10;QA=3597;QR=17070;RO=447;RPL=35;RPP=16.3163;RPPR=48.7181;RPR=59;RUN=1;SAF=89;SAP=166.009;SAR=5;SRF=443;SRP=939.226;SRR=4;TYPE=ins;ANN=CAAA
chr5B	684489042	G	A	ALT1	REF	upstream_gene_variant	MODIFIER	TRIDC5BG077610	AB=0.468085;ABP=3.42611;AC=35;AF=0.138889;AN=252;AO=104;CIGAR=1X;DP=587;DPB=587;DPRA=1.33148;EPP=24.391;EPPR=64.5533;GTI=11;LEN=1;MEANALT=1;MQM=70;MQMR=70;NS=63;NUMALT=1;ODDS=0.0578531;PAIRED=1;PAIREDR=1;PAO=0;PQA=0;PQR=0;PRO=0;QA=4061;QR=18450;RO=483;RPL=38;RPP=19.3799;RPPR=60.4172;RPR=66;RUN=1;SAF=98;SAP=179.735;SAR=6;SRF=479;SRP=1017.38;SRR=4;TYPE=snp;ANN=A
chr5B	684489575	A	G	ALT1	REF	synonymous_variant	LOW	TRIDC5BG077600	AB=0.342593;ABP=72.7387;AC=32;AF=0.125;AN=256;AO=328;CIGAR=1X;DP=2962;DPB=2962;DPRA=0.992235;EPP=3.24863;EPPR=85.3942;GTI=6;LEN=1;MEANALT=1;MQM=69.8689;MQMR=69.8731;NS=64;NUMALT=1;ODDS=0.998521;PAIRED=1;PAIREDR=1;PAO=0;PQA=0;PQR=0;PRO=0;QA=12121;QR=93234;RO=2632;RPL=199;RPP=35.45;RPPR=259.894;RPR=129;RUN=1;SAF=128;SAP=37.3302;SAR=200;SRF=1029;SRP=274.837;SRR=1603;TYPE=snp;ANN=G
chr5B	684489869	G	A	ALT1	REF	synonymous_variant	LOW	TRIDC5BG077600	AB=0.419355;ABP=4.76149;AC=27;AF=0.1125;AN=240;AO=25;CIGAR=1X;DP=326;DPB=326;DPRA=0.987633;EPP=7.26639;EPPR=12.8865;GTI=7;LEN=1;MEANALT=1;MQM=54.64;MQMR=69.6545;NS=60;NUMALT=1;ODDS=3.89176;PAIRED=1;PAIREDR=1;PAO=0;PQA=0;PQR=0;PRO=0;QA=952;QR=11223;RO=301;RPL=17;RPP=10.0459;RPPR=16.3493;RPR=8;RUN=1;SAF=9;SAP=7.26639;SAR=16;SRF=113;SRP=43.5901;SRR=188;TYPE=snp;ANN=A
chr5B	684489881	T	C	ALT1	REF	synonymous_variant	LOW	TRIDC5BG077600	AB=0.310345;ABP=12.0706;AC=26;AF=0.108333;AN=240;AO=18;CIGAR=1X;DP=292;DPB=292;DPRA=1.03239;EPP=15.074;EPPR=15.6904;GTI=7;LEN=1;MEANALT=1;MQM=53.9444;MQMR=69.5474;NS=60;NUMALT=1;ODDS=0.738978;PAIRED=1;PAIREDR=1;PAO=0;PQA=0;PQR=0;PRO=0;QA=666;QR=9980;RO=274;RPL=15;RPP=20.3821;RPPR=46.408;RPR=3;RUN=1;SAF=7;SAP=4.9405;SAR=11;SRF=101;SRP=44.0939;SRR=173;TYPE=snp;ANN=C
chr5B	684489890	G	A	ALT1	REF	synonymous_variant	LOW	TRIDC5BG077600	AB=0.275862;ABP=15.6647;AC=25;AF=0.105932;AN=236;AO=15;CIGAR=1X;DP=260;DPB=260;DPRA=1.02455;EPP=14.7363;EPPR=10.4642;GTI=7;LEN=1;MEANALT=1;MQM=52.4667;MQMR=69.9592;NS=59;NUMALT=1;ODDS=1.25126;PAIRED=1;PAIREDR=1;PAO=0;PQA=0;PQR=0;PRO=0;QA=588;QR=9154;RO=245;RPL=13;RPP=20.5268;RPPR=31.8067;RPR=2;RUN=1;SAF=5;SAP=6.62942;SAR=10;SRF=94;SRP=31.8067;SRR=151;TYPE=snp;ANN=A
chr5B	684489899	G	A	ALT1	REF	synonymous_variant	LOW	TRIDC5BG077600	AB=0.269231;ABP=15.0369;AC=21;AF=0.0954545;AN=220;AO=11;CIGAR=1X;DP=243;DPB=243;DPRA=0.965795;EPP=7.94546;EPPR=3.0197;GTI=6;LEN=1;MEANALT=1;MQM=57.7273;MQMR=69.9567;NS=55;NUMALT=1;ODDS=1.34146;PAIRED=1;PAIREDR=1;PAO=0;PQA=0;PQR=0;PRO=0;QA=431;QR=8535;RO=231;RPL=10;RPP=19.0002;RPPR=37.9889;RPR=1;RUN=1;SAF=4;SAP=4.78696;SAR=7;SRF=93;SRP=22.0459;SRR=138;TYPE=snp;ANN=A
chr5B	684489929	AAAAACC	AC	ALT1	REF	frameshift_variant	HIGH	TRIDC5BG077600	AB=0.285714;ABP=5.80219;AC=13;AF=0.065;AN=200;AO=5;CIGAR=1M5D1M;DP=194;DPB=199;DPRA=0.625;EPP=13.8677;EPPR=26.2761;GTI=3;LEN=5;MEANALT=1;MQM=43.6;MQMR=70;NS=50;NUMALT=1;ODDS=4.35402;PAIRED=1;PAIREDR=1;PAO=1;PQA=37;PQR=534;PRO=16;QA=169;QR=6755;RO=189;RPL=2;RPP=3.44459;RPPR=3.02179;RPR=3;RUN=1;SAF=2;SAP=3.44459;SAR=3;SRF=60;SRP=57.7107;SRR=129;TYPE=del;ANN=AC
chr5B	684489936	AA	AGA	ALT1	REF	frameshift_variant	HIGH	TRIDC5BG077600	AB=0.25;ABP=7.35324;AC=13;AF=0.0637255;AN=204;AO=5;CIGAR=1M1I1M;DP=196;DPB=199;DPRA=0.698649;EPP=13.8677;EPPR=27.1936;GTI=3;LEN=1;MEANALT=1;MQM=43.6;MQMR=69.6632;NS=51;NUMALT=1;ODDS=2.75616;PAIRED=1;PAIREDR=1;PAO=0.5;PQA=16.5;PQR=16.5;PRO=0.5;QA=180;QR=6838;RO=190;RPL=2;RPP=3.44459;RPPR=3.74174;RPR=3;RUN=1;SAF=2;SAP=3.44459;SAR=3;SRF=59;SRP=62.2572;SRR=131;TYPE=ins;ANN=AGA
chr5B	684489948	G	A	ALT1	REF	upstream_gene_variant	MODIFIER	TRIDC5BG077610	AB=0.235294;ABP=13.3567;AC=14;AF=0.0686275;AN=204;AO=8;CIGAR=1X;DP=193;DPB=193;DPRA=1.12326;EPP=20.3821;EPPR=31.1925;GTI=4;LEN=1;MEANALT=1;MQM=38;MQMR=69.6541;NS=51;NUMALT=1;ODDS=1.03758;PAIRED=1;PAIREDR=1;PAO=0;PQA=0;PQR=0;PRO=0;QA=312;QR=6446;RO=185;RPL=1;RPP=12.7819;RPPR=7.24761;RPR=7;RUN=1;SAF=1;SAP=12.7819;SAR=7;SRF=45;SRP=108.943;SRR=140;TYPE=snp;ANN=A
chr5B	684489956	AAGAT	GAGAC	ALT1	REF	upstream_gene_variant	MODIFIER	TRIDC5BG077610	AB=0.285714;ABP=8.59409;AC=15;AF=0.075;AN=200;AO=8;CIGAR=1X3M1X;DP=168;DPB=172.2;DPRA=1.08;EPP=12.7819;EPPR=46.1099;GTI=6;LEN=5;MEANALT=1.2;MQM=38;MQMR=70;NS=50;NUMALT=1;ODDS=0.198382;PAIRED=1;PAIREDR=1;PAO=0;PQA=0;PQR=338;PRO=11;QA=302;QR=5868;RO=158;RPL=2;RPP=7.35324;RPPR=8.5077;RPR=6;RUN=1;SAF=1;SAP=12.7819;SAR=7;SRF=38;SRP=95.4216;SRR=120;TYPE=complex;ANN=GAGAC
chr5B	684489993	AGCCTAAGGCGATG	AG	ALT1	REF	upstream_gene_variant	MODIFIER	TRIDC5BG077610	AB=0.416667;ABP=3.73412;AC=17;AF=0.0904255;AN=188;AO=8;CIGAR=1M12D1M;DP=133;DPB=136;DPRA=0.868644;EPP=7.35324;EPPR=54.268;GTI=7;LEN=12;MEANALT=1.16667;MQM=46;MQMR=70;NS=47;NUMALT=1;ODDS=0.882977;PAIRED=1;PAIREDR=1;PAO=2;PQA=50.5;PQR=596.5;PRO=19;QA=302;QR=4493;RO=119;RPL=6;RPP=7.35324;RPPR=75.4353;RPR=2;RUN=1;SAF=0;SAP=20.3821;SAR=8;SRF=19;SRP=122.733;SRR=100;TYPE=del;ANN=AG
chr5B	684490010	T	A	ALT1	REF	upstream_gene_variant	MODIFIER	TRIDC5BG077610	AB=0.5;ABP=3.0103;AC=18;AF=0.0957447;AN=188;AO=10;CIGAR=1X;DP=138;DPB=138;DPRA=0.960055;EPP=16.9077;EPPR=64.083;GTI=7;LEN=1;MEANALT=1;MQM=44.4;MQMR=70;NS=47;NUMALT=1;ODDS=0.139329;PAIRED=1;PAIREDR=1;PAO=0;PQA=0;PQR=0;PRO=0;QA=391;QR=4816;RO=128;RPL=9;RPP=16.9077;RPPR=64.083;RPR=1;RUN=1;SAF=0;SAP=24.725;SAR=10;SRF=24;SRP=111.584;SRR=104;TYPE=snp;ANN=A
chr5B	684490286	A	G	ALT1	REF	upstream_gene_variant	MODIFIER	TRIDC5BG077610	AB=0.5;ABP=3.0103;AC=18;AF=0.0849057;AN=212;AO=8;CIGAR=1X;DP=139;DPB=139;DPRA=0.664615;EPP=4.09604;EPPR=16.9508;GTI=4;LEN=1;MEANALT=1;MQM=30.625;MQMR=69.542;NS=53;NUMALT=1;ODDS=3.62988;PAIRED=1;PAIREDR=1;PAO=0;PQA=0;PQR=0;PRO=0;QA=317;QR=4977;RO=131;RPL=2;RPP=7.35324;RPPR=53.1531;RPR=6;RUN=1;SAF=1;SAP=12.7819;SAR=7;SRF=29;SRP=91.3445;SRR=102;TYPE=snp;ANN=G
chr5B	684490584	C	G	ALT1	REF	upstream_gene_variant	MODIFIER	TRIDC5BG077610	AB=0.108108;ABP=200.438;AC=26;AF=0.103175;AN=252;AO=46;CIGAR=1X;DP=1073;DPB=1073;DPRA=1.36732;EPP=30.2009;EPPR=70.7573;GTI=6;LEN=1;MEANALT=1;MQM=58.0217;MQMR=69.9981;NS=63;NUMALT=1;ODDS=3.59596;PAIRED=1;PAIREDR=1;PAO=0;PQA=0;PQR=0;PRO=0;QA=1711;QR=37888;RO=1027;RPL=0;RPP=102.898;RPPR=33.967;RPR=46;RUN=1;SAF=35;SAP=30.2009;SAR=11;SRF=545;SRP=11.4023;SRR=482;TYPE=snp;ANN=G
chr5B	684490765	CT	GA	REF	ALT1	5_prime_UTR_variant	MODIFIER	TRIDC5BG077600	AB=0.538462;ABP=4.68066;AC=216;AF=0.885246;AN=244;AO=497;CIGAR=2X;DP=588;DPB=588;DPRA=1.66071;EPP=36.0805;EPPR=7.73928;GTI=9;LEN=2;MEANALT=1.01786;MQM=70;MQMR=70;NS=61;NUMALT=1;ODDS=0.113915;PAIRED=1;PAIREDR=1;PAO=0;PQA=0;PQR=0;PRO=0;QA=17726;QR=3218;RO=90;RPL=273;RPP=13.5007;RPPR=7.73928;RPR=224;RUN=1;SAF=112;SAP=328.639;SAR=385;SRF=24;SRP=45.5712;SRR=66;TYPE=mnp;ANN=GA
chr5B	684490813	G	A	REF	ALT1	synonymous_variant	LOW	TRIDC5BG077600	AB=0.509804;ABP=3.09546;AC=206;AF=0.858333;AN=240;AO=379;CIGAR=1X;DP=445;DPB=445;DPRA=2.97917;EPP=28.7299;EPPR=5.11597;GTI=9;LEN=1;MEANALT=1;MQM=69.7836;MQMR=69.0152;NS=60;NUMALT=1;ODDS=0.932537;PAIRED=1;PAIREDR=1;PAO=0;PQA=0;PQR=0;PRO=0;QA=13891;QR=2354;RO=66;RPL=242;RPP=66.1778;RPPR=13.6703;RPR=137;RUN=1;SAF=23;SAP=638.346;SAR=356;SRF=7;SRP=91.9749;SRR=59;TYPE=snp;ANN=A
chr5B	684490816	G	T	ALT1	REF	missense_variant	MODERATE	TRIDC5BG077600	AB=0.475248;ABP=3.54779;AC=30;AF=0.125;AN=240;AO=61;CIGAR=1X;DP=444;DPB=444;DPRA=1.72727;EPP=7.31765;EPPR=109.424;GTI=8;LEN=1;MEANALT=1;MQM=68.9344;MQMR=69.7859;NS=60;NUMALT=1;ODDS=0.939564;PAIRED=1;PAIREDR=1;PAO=0;PQA=0;PQR=0;PRO=0;QA=2156;QR=13737;RO=383;RPL=40;RPP=15.8611;RPPR=176.643;RPR=21;RUN=1;SAF=6;SAP=88.4809;SAR=55;SRF=23;SRP=646.906;SRR=360;TYPE=snp;ANN=T
chr5B	684521881	GTC	GC	REF	ALT1	intergenic_region	MODIFIER	TRIDC5BG077610-TRIDC5BG077630	AB=0.342105;ABP=11.239;AC=65;AF=0.439189;AN=148;AO=30;CIGAR=1M1D1M;DP=89;DPB=80.3333;DPRA=1.51406;EPP=4.16842;EPPR=23.1631;GTI=25;LEN=1;MEANALT=1.1;MQM=31.4333;MQMR=31.3333;NS=37;NUMALT=1;ODDS=0.0354133;PAIRED=1;PAIREDR=1;PAO=1;PQA=34;PQR=66;PRO=2;QA=1048;QR=2046;RO=57;RPL=9;RPP=13.4334;RPPR=26.8203;RPR=21;RUN=1;SAF=26;SAP=38.0434;SAR=4;SRF=56;SRP=118.251;SRR=1;TYPE=del;ANN=GC
chr5B	684521886	T	A	ALT1	REF	intergenic_region	MODIFIER	TRIDC5BG077610-TRIDC5BG077630	AB=0.241379;ABP=19.8579;AC=32;AF=0.216216;AN=148;AO=18;CIGAR=1X;DP=91;DPB=91;DPRA=2.04561;EPP=42.0968;EPPR=3.75395;GTI=15;LEN=1;MEANALT=1;MQM=31.3889;MQMR=32.6986;NS=37;NUMALT=1;ODDS=3.64297;PAIRED=1;PAIREDR=1;PAO=0;PQA=0;PQR=0;PRO=0;QA=654;QR=2322;RO=73;RPL=0;RPP=42.0968;RPPR=9.70319;RPR=18;RUN=1;SAF=18;SAP=42.0968;SAR=0;SRF=68;SRP=121.073;SRR=5;TYPE=snp;ANN=A
chr5B	684521899	T	C	ALT1	REF	intergenic_region	MODIFIER	TRIDC5BG077610-TRIDC5BG077630	AB=0.210526;ABP=16.8392;AC=21;AF=0.141892;AN=148;AO=11;CIGAR=1X;DP=87;DPB=87;DPRA=1.998;EPP=26.8965;EPPR=4.429;GTI=9;LEN=1;MEANALT=1;MQM=24.0909;MQMR=32.1733;NS=37;NUMALT=1;ODDS=3.37851;PAIRED=1;PAIREDR=1;PAO=0;PQA=0;PQR=0;PRO=0;QA=430;QR=2734;RO=75;RPL=0;RPP=26.8965;RPPR=13.4623;RPR=11;RUN=1;SAF=11;SAP=26.8965;SAR=0;SRF=69;SRP=117.925;SRR=6;TYPE=snp;ANN=C
chr5B	684521904	TAA	TA	ALT1	REF	intergenic_region	MODIFIER	TRIDC5BG077610-TRIDC5BG077630	AB=0.371429;ABP=8.03571;AC=38;AF=0.25;AN=152;AO=25;CIGAR=1M1D1M;DP=84;DPB=76.6667;DPRA=2.125;EPP=10.0459;EPPR=3.93042;GTI=17;LEN=1;MEANALT=1;MQM=22.24;MQMR=31.0847;NS=38;NUMALT=1;ODDS=4.43399;PAIRED=1;PAIREDR=1;PAO=1;PQA=31.5;PQR=31.5;PRO=1;QA=907;QR=2196;RO=59;RPL=8;RPP=10.0459;RPPR=11.2913;RPR=17;RUN=1;SAF=25;SAP=57.2971;SAR=0;SRF=52;SRP=77.5396;SRR=7;TYPE=del;ANN=TA
chr5B	684521928	A	G	ALT1	REF	intergenic_region	MODIFIER	TRIDC5BG077610-TRIDC5BG077630	AB=0.479167;ABP=3.19126;AC=66;AF=0.392857;AN=168;AO=44;CIGAR=1X;DP=103;DPB=103;DPRA=1.82143;EPP=3.79993;EPPR=26.0132;GTI=28;LEN=1;MEANALT=1;MQM=21.5227;MQMR=37.0847;NS=42;NUMALT=1;ODDS=0.875343;PAIRED=1;PAIREDR=1;PAO=0;PQA=0;PQR=0;PRO=0;QA=1583;QR=2089;RO=59;RPL=24;RPP=3.79993;RPPR=3.93042;RPR=20;RUN=1;SAF=44;SAP=98.5551;SAR=0;SRF=41;SRP=22.4799;SRR=18;TYPE=snp;ANN=G
chr5B	684551536	CGGAT	TGGAC	REF	ALT1	intergenic_region	MODIFIER	TRIDC5BG077610-TRIDC5BG077630	AB=0.4375;ABP=5.18177;AC=100;AF=0.555556;AN=180;AO=55;CIGAR=1X3M1X;DP=130;DPB=133;DPRA=1.46992;EPP=9.68264;EPPR=3.49285;GTI=30;LEN=5;MEANALT=1.07143;MQM=63;MQMR=52.6111;NS=45;NUMALT=1;ODDS=0.0697929;PAIRED=1;PAIREDR=1;PAO=0;PQA=0;PQR=163;PRO=5;QA=2000;QR=2655;RO=72;RPL=26;RPP=3.36563;RPPR=3.49285;RPR=29;RUN=1;SAF=28;SAP=3.04978;SAR=27;SRF=28;SRP=10.7311;SRR=44;TYPE=complex;ANN=TGGAC
chr5B	684597319	G	A	ALT1	REF	intergenic_region	MODIFIER	TRIDC5BG077610-TRIDC5BG077630	AB=0.44;ABP=3.79203;AC=21;AF=0.109375;AN=192;AO=15;CIGAR=1X;DP=169;DPB=169;DPRA=1.21327;EPP=35.5824;EPPR=57.2125;GTI=10;LEN=1;MEANALT=1;MQM=29.2667;MQMR=28.1169;NS=48;NUMALT=1;ODDS=5.43777;PAIRED=1;PAIREDR=1;PAO=0;PQA=0;PQR=0;PRO=0;QA=595;QR=5938;RO=154;RPL=0;RPP=35.5824;RPPR=161.443;RPR=15;RUN=1;SAF=15;SAP=35.5824;SAR=0;SRF=128;SRP=149.712;SRR=26;TYPE=snp;ANN=A
chr5B	684611288	G	A	ALT1	REF	intergenic_region	MODIFIER	TRIDC5BG077610-TRIDC5BG077630	AB=0.307692;ABP=15.538;AC=27;AF=0.108871;AN=248;AO=29;CIGAR=1X;DP=305;DPB=305;DPRA=1.32441;EPP=24.6501;EPPR=184.785;GTI=7;LEN=1;MEANALT=1;MQM=70;MQMR=69.9819;NS=62;NUMALT=1;ODDS=1.10081;PAIRED=1;PAIREDR=1;PAO=0;PQA=0;PQR=0;PRO=0;QA=1118;QR=10643;RO=276;RPL=6;RPP=24.6501;RPPR=184.785;RPR=23;RUN=1;SAF=27;SAP=49.8093;SAR=2;SRF=258;SRP=456.187;SRR=18;TYPE=snp;ANN=A
chr5B	684611431	G	A	ALT1	REF	intergenic_region	MODIFIER	TRIDC5BG077610-TRIDC5BG077630	AB=0.544503;ABP=6.29593;AC=26;AF=0.101562;AN=256;AO=359;CIGAR=1X;DP=3213;DPB=3213;DPRA=1.12453;EPP=13.1781;EPPR=55.2749;GTI=2;LEN=1;MEANALT=1;MQM=70;MQMR=69.9982;NS=64;NUMALT=1;ODDS=0.798356;PAIRED=1;PAIREDR=1;PAO=0;PQA=0;PQR=0;PRO=0;QA=13304;QR=105387;RO=2852;RPL=106;RPP=133.716;RPPR=968.353;RPR=253;RUN=1;SAF=261;SAP=163.717;SAR=98;SRF=2132;SRP=1521.02;SRR=720;TYPE=snp;ANN=A
chr5B	684612017	C	T	REF	ALT1	intergenic_region	MODIFIER	TRIDC5BG077610-TRIDC5BG077630	AB=0.461187;ABP=5.87585;AC=226;AF=0.882812;AN=256;AO=1813;CIGAR=1X;DP=2063;DPB=2063;DPRA=0.867044;EPP=90.9723;EPPR=3.04504;GTI=6;LEN=1;MEANALT=1;MQM=70;MQMR=70;NS=64;NUMALT=1;ODDS=0.818134;PAIRED=1;PAIREDR=1;PAO=0;PQA=0;PQR=0;PRO=0;QA=68777;QR=9504;RO=250;RPL=1025;RPP=70.2852;RPPR=19.8262;RPR=788;RUN=1;SAF=846;SAP=20.5462;SAR=967;SRF=135;SRP=6.48466;SRR=115;TYPE=snp;ANN=T
chr5B	684612332	A	G	REF	ALT1	intergenic_region	MODIFIER	TRIDC5BG077610-TRIDC5BG077630	AB=0.387097;ABP=30.4689;AC=228;AF=0.890625;AN=256;AO=2492;CIGAR=1X;DP=2742;DPB=2742;DPRA=1.92029;EPP=249.631;EPPR=28.5426;GTI=8;LEN=1;MEANALT=1.03333;MQM=70;MQMR=70;NS=64;NUMALT=1;ODDS=0.318267;PAIRED=1;PAIREDR=1;PAO=0;PQA=0;PQR=0;PRO=0;QA=94663;QR=8978;RO=248;RPL=1039;RPP=152.361;RPPR=18.4558;RPR=1453;RUN=1;SAF=1225;SAP=4.54741;SAR=1267;SRF=104;SRP=17.0198;SRR=144;TYPE=snp;ANN=G
chr5B	684612380	T	C	REF	ALT1	intergenic_region	MODIFIER	TRIDC5BG077610-TRIDC5BG077630	AB=0.43;ABP=11.5225;AC=227;AF=0.886719;AN=256;AO=2359;CIGAR=1X;DP=2600;DPB=2600;DPRA=1.94884;EPP=3.12168;EPPR=12.5128;GTI=8;LEN=1;MEANALT=1.11667;MQM=70;MQMR=70;NS=64;NUMALT=1;ODDS=0.397136;PAIRED=1;PAIREDR=1;PAO=0;PQA=0;PQR=0;PRO=0;QA=90700;QR=8939;RO=234;RPL=1451;RPP=274.42;RPPR=34.2275;RPR=908;RUN=1;SAF=891;SAP=309.473;SAR=1468;SRF=91;SRP=28.1029;SRR=143;TYPE=snp;ANN=C
chr5B	684612623	G	A	ALT1	REF	intergenic_region	MODIFIER	TRIDC5BG077610-TRIDC5BG077630	AB=0.497207;ABP=3.02243;AC=27;AF=0.105469;AN=256;AO=147;CIGAR=1X;DP=1527;DPB=1527;DPRA=0.992093;EPP=61.6401;EPPR=195.768;GTI=5;LEN=1;MEANALT=1;MQM=70;MQMR=70;NS=64;NUMALT=1;ODDS=2.5221;PAIRED=1;PAIREDR=1;PAO=0;PQA=0;PQR=0;PRO=0;QA=5320;QR=51130;RO=1380;RPL=81;RPP=6.33398;RPPR=75.0717;RPR=66;RUN=1;SAF=43;SAP=57.9766;SAR=104;SRF=416;SRP=475.548;SRR=964;TYPE=snp;ANN=A
chr5B	684612638	A	G	ALT1	REF	intergenic_region	MODIFIER	TRIDC5BG077610-TRIDC5BG077630	AB=0.419355;ABP=11.7662;AC=28;AF=0.109375;AN=256;AO=135;CIGAR=1X;DP=1390;DPB=1390;DPRA=1.04292;EPP=4.31318;EPPR=53.6047;GTI=5;LEN=1;MEANALT=1;MQM=70;MQMR=70;NS=64;NUMALT=1;ODDS=0.0543514;PAIRED=1;PAIREDR=1;PAO=0;PQA=0;PQR=0;PRO=0;QA=5039;QR=46728;RO=1255;RPL=94;RPP=48.193;RPPR=292.449;RPR=41;RUN=1;SAF=31;SAP=88.7272;SAR=104;SRF=312;SRP=691.931;SRR=943;TYPE=snp;ANN=G
chr5B	684629910	T	G	ALT1	REF	upstream_gene_variant	MODIFIER	TRIDC5BG077630	AB=0.455;ABP=6.52809;AC=14;AF=0.0546875;AN=256;AO=102;CIGAR=1X;DP=1094;DPB=1094;DPRA=2.83628;EPP=52.06;EPPR=210.912;GTI=7;LEN=1;MEANALT=1;MQM=67.5686;MQMR=59.7996;NS=64;NUMALT=1;ODDS=0.0491479;PAIRED=1;PAIREDR=1;PAO=0;PQA=0;PQR=0;PRO=0;QA=3930;QR=37119;RO=978;RPL=28;RPP=48.0577;RPPR=265.754;RPR=74;RUN=1;SAF=63;SAP=15.2727;SAR=39;SRF=711;SRP=440.715;SRR=267;TYPE=snp;ANN=G
chr5B	684630013	C	T	REF	ALT1	upstream_gene_variant	MODIFIER	TRIDC5BG077630	AB=0.165468;ABP=138.126;AC=145;AF=0.683962;AN=212;AO=107;CIGAR=1X;DP=424;DPB=424;DPRA=0.821948;EPP=13.7459;EPPR=11.9161;GTI=60;LEN=1;MEANALT=1;MQM=25.0654;MQMR=63.8576;NS=53;NUMALT=1;ODDS=0.107681;PAIRED=1;PAIREDR=1;PAO=0;PQA=0;PQR=0;PRO=0;QA=4030;QR=11819;RO=316;RPL=72;RPP=30.793;RPPR=12.9331;RPR=35;RUN=1;SAF=40;SAP=17.8047;SAR=67;SRF=203;SRP=58.6715;SRR=113;TYPE=snp;ANN=T
chr5B	684630046	A	G	REF	ALT1	upstream_gene_variant	MODIFIER	TRIDC5BG077630	AB=0.5;ABP=3.0103;AC=136;AF=0.73913;AN=184;AO=79;CIGAR=1X;DP=432;DPB=432;DPRA=0.47619;EPP=58.6715;EPPR=69.7337;GTI=57;LEN=1;MEANALT=1.02381;MQM=19;MQMR=69.4972;NS=46;NUMALT=1;ODDS=0.00571626;PAIRED=1;PAIREDR=1;PAO=0;PQA=0;PQR=0;PRO=0;QA=2881;QR=12556;RO=352;RPL=53;RPP=23.0483;RPPR=5.00904;RPR=26;RUN=1;SAF=21;SAP=40.64;SAR=58;SRF=195;SRP=11.9183;SRR=157;TYPE=snp;ANN=G
chr5B	684630265	C	G	ALT1	REF	upstream_gene_variant	MODIFIER	TRIDC5BG077630	AB=0.140496;ABP=138.844;AC=13;AF=0.0515873;AN=252;AO=64;CIGAR=1X;DP=1495;DPB=1495;DPRA=2.79692;EPP=133.434;EPPR=290.552;GTI=9;LEN=1;MEANALT=1.06667;MQM=20;MQMR=56.394;NS=63;NUMALT=1;ODDS=9.54714;PAIRED=1;PAIREDR=1;PAO=0;PQA=0;PQR=0;PRO=0;QA=2477;QR=52496;RO=1429;RPL=63;RPP=133.434;RPPR=163.515;RPR=1;RUN=1;SAF=0;SAP=141.985;SAR=64;SRF=359;SRP=771.187;SRR=1070;TYPE=snp;ANN=G
chr5B	684630557	A	G	REF	ALT1	upstream_gene_variant	MODIFIER	TRIDC5BG077630	AB=0.39726;ABP=9.70319;AC=219;AF=0.869048;AN=252;AO=373;CIGAR=1X;DP=462;DPB=462;DPRA=1.1875;EPP=4.32017;EPPR=5.96253;GTI=8;LEN=1;MEANALT=1;MQM=69.9786;MQMR=69.5056;NS=63;NUMALT=1;ODDS=4.45394;PAIRED=1;PAIREDR=1;PAO=0;PQA=0;PQR=0;PRO=0;QA=13700;QR=3280;RO=89;RPL=215;RPP=21.9248;RPPR=20.7969;RPR=158;RUN=1;SAF=192;SAP=3.71472;SAR=181;SRF=47;SRP=3.62026;SRR=42;TYPE=snp;ANN=G
chr5B	684630686	A	G	REF	ALT1	upstream_gene_variant	MODIFIER	TRIDC5BG077630	AB=0.706294;ABP=108.729;AC=189;AF=0.800847;AN=236;AO=337;CIGAR=1X;DP=447;DPB=447;DPRA=2.53997;EPP=16.0585;EPPR=4.2737;GTI=12;LEN=1;MEANALT=1;MQM=69.4748;MQMR=67.6727;NS=59;NUMALT=1;ODDS=0.462412;PAIRED=1;PAIREDR=1;PAO=0;PQA=0;PQR=0;PRO=0;QA=11974;QR=3877;RO=110;RPL=177;RPP=4.87248;RPPR=3.72096;RPR=160;RUN=1;SAF=173;SAP=3.53223;SAR=164;SRF=69;SRP=18.487;SRR=41;TYPE=snp;ANN=G
chr5B	684633987	T	A	ALT1	REF	upstream_gene_variant	MODIFIER	TRIDC5BG077630	AB=0.333333;ABP=5.9056;AC=13;AF=0.0541667;AN=240;AO=7;CIGAR=1X;DP=380;DPB=380;DPRA=2.47651;EPP=18.2106;EPPR=102.915;GTI=4;LEN=1;MEANALT=1;MQM=21.2857;MQMR=49.2815;NS=60;NUMALT=1;ODDS=9.12974;PAIRED=1;PAIREDR=1;PAO=0;PQA=0;PQR=0;PRO=0;QA=279;QR=14102;RO=373;RPL=0;RPP=18.2106;RPPR=189.542;RPR=7;RUN=1;SAF=7;SAP=18.2106;SAR=0;SRF=335;SRP=516.532;SRR=38;TYPE=snp;ANN=A
chr5B	684633992	G	A	ALT1	REF	upstream_gene_variant	MODIFIER	TRIDC5BG077630	AB=0.307692;ABP=7.18621;AC=12;AF=0.0491803;AN=244;AO=7;CIGAR=1X;DP=398;DPB=398;DPRA=2.48935;EPP=18.2106;EPPR=64.2392;GTI=4;LEN=1;MEANALT=1;MQM=21.2857;MQMR=49.7596;NS=61;NUMALT=1;ODDS=8.54695;PAIRED=1;PAIREDR=1;PAO=0;PQA=0;PQR=0;PRO=0;QA=271;QR=14772;RO=391;RPL=0;RPP=18.2106;RPPR=110.312;RPR=7;RUN=1;SAF=7;SAP=18.2106;SAR=0;SRF=354;SRP=561.09;SRR=37;TYPE=snp;ANN=A
chr5B	684634082	G	C	REF	ALT1	upstream_gene_variant	MODIFIER	TRIDC5BG077630	AB=0.292876;ABP=144.236;AC=46;AF=0.188525;AN=244;AO=115;CIGAR=1X;DP=520;DPB=520;DPRA=2.95507;EPP=23.5732;EPPR=7.54183;GTI=21;LEN=1;MEANALT=1.06061;MQM=25.113;MQMR=64.5409;NS=61;NUMALT=1;ODDS=0.40755;PAIRED=1;PAIREDR=1;PAO=0;PQA=0;PQR=0;PRO=0;QA=3907;QR=13164;RO=403;RPL=62;RPP=4.53977;RPPR=21.7669;RPR=53;RUN=1;SAF=99;SAP=133.091;SAR=16;SRF=257;SRP=69.3992;SRR=146;TYPE=snp;ANN=C
chr5B	684634116	A	G	ALT1	REF	intergenic_region	MODIFIER	TRIDC5BG077630-TRIDC5BG077670	AB=0.172414;ABP=84.1036;AC=19;AF=0.0766129;AN=248;AO=19;CIGAR=1X;DP=728;DPB=728;DPRA=1.55133;EPP=12.2676;EPPR=158.061;GTI=13;LEN=1;MEANALT=1;MQM=24.6316;MQMR=49.323;NS=62;NUMALT=1;ODDS=8.34782;PAIRED=1;PAIREDR=1;PAO=0;PQA=0;PQR=0;PRO=0;QA=718;QR=23898;RO=709;RPL=0;RPP=44.2683;RPPR=147.231;RPR=19;RUN=1;SAF=14;SAP=12.2676;SAR=5;SRF=318;SRP=19.3316;SRR=391;TYPE=snp;ANN=G
chr5B	684634163	G	A	ALT1	REF	intergenic_region	MODIFIER	TRIDC5BG077630-TRIDC5BG077670	AB=0.208333;ABP=20.744;AC=8;AF=0.0322581;AN=248;AO=9;CIGAR=1X;DP=865;DPB=865;DPRA=1.72879;EPP=3.25157;EPPR=27.3734;GTI=4;LEN=1;MEANALT=1;MQM=20.1111;MQMR=46.7044;NS=62;NUMALT=1;ODDS=11.5197;PAIRED=1;PAIREDR=1;PAO=0;PQA=0;PQR=0;PRO=0;QA=295;QR=29975;RO=856;RPL=5;RPP=3.25157;RPPR=28.378;RPR=4;RUN=1;SAF=0;SAP=22.5536;SAR=9;SRF=247;SRP=335.438;SRR=609;TYPE=snp;ANN=A
chr5B	684637818	CTTCGT	TTTCGT	REF	ALT1	intergenic_region	MODIFIER	TRIDC5BG077630-TRIDC5BG077670	AB=0.582192;ABP=11.5772;AC=118;AF=0.59;AN=200;AO=131;CIGAR=1X5M;DP=219;DPB=222.5;DPRA=2.76543;EPP=4.35297;EPPR=10.7579;GTI=29;LEN=1;MEANALT=1.08333;MQM=70;MQMR=58.8642;NS=50;NUMALT=1;ODDS=0.0348453;PAIRED=1;PAIREDR=1;PAO=3.5;PQA=80;PQR=80;PRO=2.5;QA=4249;QR=2922;RO=81;RPL=43;RPP=36.577;RPPR=32.2045;RPR=88;RUN=1;SAF=97;SAP=68.8009;SAR=34;SRF=57;SRP=32.2045;SRR=24;TYPE=snp;ANN=TTTCGT
chr5B	684637824	C	T	REF	ALT1	intergenic_region	MODIFIER	TRIDC5BG077630-TRIDC5BG077670	AB=0.597403;ABP=15.7007;AC=114;AF=0.57;AN=200;AO=139;CIGAR=1X;DP=228;DPB=228;DPRA=2.89506;EPP=3.40085;EPPR=3.62026;GTI=28;LEN=1;MEANALT=1;MQM=70;MQMR=56.1348;NS=50;NUMALT=1;ODDS=0.289619;PAIRED=1;PAIREDR=1;PAO=0;PQA=0;PQR=0;PRO=0;QA=5047;QR=3158;RO=89;RPL=47;RPP=34.6451;RPPR=18.2594;RPR=92;RUN=1;SAF=99;SAP=57.3908;SAR=40;SRF=63;SRP=36.4119;SRR=26;TYPE=snp;ANN=T
chr5B	684653180	G	A	REF	ALT1	intergenic_region	MODIFIER	TRIDC5BG077630-TRIDC5BG077670	AB=0.310811;ABP=118.04;AC=56;AF=0.229508;AN=244;AO=117;CIGAR=1X;DP=469;DPB=469;DPRA=2.77039;EPP=3.91972;EPPR=43.6001;GTI=18;LEN=1;MEANALT=1;MQM=33.6496;MQMR=40.9516;NS=61;NUMALT=1;ODDS=0.0566955;PAIRED=1;PAIREDR=1;PAO=0;PQA=0;PQR=0;PRO=0;QA=4332;QR=12932;RO=351;RPL=63;RPP=4.51363;RPPR=3.06598;RPR=54;RUN=1;SAF=47;SAP=12.8283;SAR=70;SRF=183;SRP=4.40227;SRR=168;TYPE=snp;ANN=A
chr5B	684653186	G	C	ALT1	REF	intergenic_region	MODIFIER	TRIDC5BG077630-TRIDC5BG077670	AB=0.259615;ABP=159.607;AC=61;AF=0.25;AN=244;AO=92;CIGAR=1X;DP=467;DPB=467;DPRA=2.7045;EPP=14.4341;EPPR=7.23164;GTI=22;LEN=1;MEANALT=1;MQM=39.7391;MQMR=38.2747;NS=61;NUMALT=1;ODDS=0.0623246;PAIRED=1;PAIREDR=1;PAO=0;PQA=0;PQR=0;PRO=0;QA=3340;QR=13672;RO=375;RPL=71;RPP=62.0177;RPPR=3.29404;RPR=21;RUN=1;SAF=62;SAP=27.1797;SAR=30;SRF=165;SRP=14.7363;SRR=210;TYPE=snp;ANN=C
chr5B	684653194	C	T	REF	ALT1	intergenic_region	MODIFIER	TRIDC5BG077630-TRIDC5BG077670	AB=0.277778;ABP=118.822;AC=33;AF=0.1375;AN=240;AO=77;CIGAR=1X;DP=450;DPB=450;DPRA=2.55172;EPP=3.71532;EPPR=44.4209;GTI=9;LEN=1;MEANALT=1.08696;MQM=30.0909;MQMR=38.9595;NS=60;NUMALT=1;ODDS=0.0159878;PAIRED=1;PAIREDR=1;PAO=0;PQA=0;PQR=0;PRO=0;QA=2793;QR=13421;RO=370;RPL=43;RPP=5.29458;RPPR=20.1239;RPR=34;RUN=1;SAF=24;SAP=26.7273;SAR=53;SRF=191;SRP=3.85541;SRR=179;TYPE=snp;ANN=T
chr5B	684653340	G	A	REF	ALT1	intergenic_region	MODIFIER	TRIDC5BG077630-TRIDC5BG077670	AB=0.230088;ABP=74.5152;AC=24;AF=0.117647;AN=204;AO=29;CIGAR=1X;DP=248;DPB=248;DPRA=2.32251;EPP=3.08518;EPPR=4.00639;GTI=7;LEN=1;MEANALT=1.07143;MQM=32.3103;MQMR=30.8073;NS=51;NUMALT=1;ODDS=0.00987342;PAIRED=1;PAIREDR=1;PAO=0;PQA=0;PQR=0;PRO=0;QA=1070;QR=8122;RO=218;RPL=17;RPP=4.88226;RPPR=57.5561;RPR=12;RUN=1;SAF=4;SAP=36.0317;SAR=25;SRF=34;SRP=227.13;SRR=184;TYPE=snp;ANN=A
chr5B	684654805	G	A	REF	ALT1	intergenic_region	MODIFIER	TRIDC5BG077630-TRIDC5BG077670	AB=0.447368;ABP=4.83891;AC=56;AF=0.269231;AN=208;AO=55;CIGAR=1X;DP=175;DPB=175;DPRA=1.60474;EPP=14.4204;EPPR=3.08268;GTI=22;LEN=1;MEANALT=1;MQM=52.4182;MQMR=37.6;NS=52;NUMALT=1;ODDS=0.0163628;PAIRED=1;PAIREDR=1;PAO=0;PQA=0;PQR=0;PRO=0;QA=1839;QR=4195;RO=120;RPL=22;RPP=7.78754;RPPR=51.9408;RPR=33;RUN=1;SAF=41;SAP=31.7922;SAR=14;SRF=95;SRP=91.6788;SRR=25;TYPE=snp;ANN=A
chr5B	684654891	G	A	REF	ALT1	intergenic_region	MODIFIER	TRIDC5BG077630-TRIDC5BG077670	AB=0.431373;ABP=5.09662;AC=51;AF=0.255;AN=200;AO=36;CIGAR=1X;DP=125;DPB=125;DPRA=1.82516;EPP=6.8707;EPPR=5.96253;GTI=18;LEN=1;MEANALT=1;MQM=56.4722;MQMR=32.0787;NS=50;NUMALT=1;ODDS=0.299839;PAIRED=1;PAIREDR=1;PAO=0;PQA=0;PQR=0;PRO=0;QA=1333;QR=3172;RO=89;RPL=21;RPP=5.18177;RPPR=10.0615;RPR=15;RUN=1;SAF=7;SAP=32.2045;SAR=29;SRF=14;SRP=93.7974;SRR=75;TYPE=snp;ANN=A
chr5B	684654900	ACGTGATCGACGCGC	ACGTGATCGACGTGC,AC	ALT1	ALT2	intergenic_region	MODIFIER	TRIDC5BG077630-TRIDC5BG077670	AB=0.580645,0.419355;ABP=4.76149,4.76149;AC=128,36;AF=0.780488,0.219512;AN=164;AO=61,22;CIGAR=12M1X2M,1M13D1M;DP=83;DPB=76.8667;DPRA=1.78241,1.69206;EPP=3.90025,4.58955;EPPR=0;GTI=10;LEN=1,13;MEANALT=1.27778,1.66667;MQM=28.0164,60.7273;MQMR=0;NS=41;NUMALT=2;ODDS=12.4883;PAIRED=1,1;PAIREDR=0;PAO=10.1667,0.666667;PQA=341.167,22.6667;PQR=312.167;PRO=9.16667;QA=1554,724;QR=0;RO=0;RPL=28,13;RPP=3.9002…
chr5B	684654961	C	A	ALT1	REF	intergenic_region	MODIFIER	TRIDC5BG077630-TRIDC5BG077670	AB=0.333333;ABP=5.18177;AC=48;AF=0.413793;AN=116;AO=16;CIGAR=1X;DP=43;DPB=43;DPRA=1.12245;EPP=37.7539;EPPR=61.6401;GTI=22;LEN=1;MEANALT=1;MQM=28.3125;MQMR=53.4815;NS=29;NUMALT=1;ODDS=5.44219;PAIRED=1;PAIREDR=1;PAO=0;PQA=0;PQR=0;PRO=0;QA=602;QR=975;RO=27;RPL=16;RPP=37.7539;RPPR=61.6401;RPR=0;RUN=1;SAF=0;SAP=37.7539;SAR=16;SRF=0;SRP=61.6401;SRR=27;TYPE=snp;ANN=A
chr5B	684735479	T	C	ALT1	REF	intergenic_region	MODIFIER	TRIDC5BG077630-TRIDC5BG077670	AB=0;ABP=0;AC=32;AF=0.8;AN=40;AO=10;CIGAR=1X;DP=12;DPB=12;DPRA=1.25;EPP=3.0103;EPPR=7.35324;GTI=1;LEN=1;MEANALT=1;MQM=38.4;MQMR=23;NS=10;NUMALT=1;ODDS=7.32296;PAIRED=1;PAIREDR=1;PAO=0;PQA=0;PQR=0;PRO=0;QA=363;QR=78;RO=2;RPL=4;RPP=3.87889;RPPR=3.0103;RPR=6;RUN=1;SAF=3;SAP=6.48466;SAR=7;SRF=1;SRP=3.0103;SRR=1;TYPE=snp;ANN=C
chr5B	684741650	G	A	ALT1	REF	intergenic_region	MODIFIER	TRIDC5BG077630-TRIDC5BG077670	AB=0.444444;ABP=3.9754;AC=11;AF=0.0597826;AN=184;AO=18;CIGAR=1X;DP=197;DPB=197;DPRA=2.50943;EPP=3.0103;EPPR=6.5162;GTI=3;LEN=1;MEANALT=1;MQM=68.7778;MQMR=68.1341;NS=46;NUMALT=1;ODDS=2.59369;PAIRED=1;PAIREDR=1;PAO=0;PQA=0;PQR=0;PRO=0;QA=669;QR=6888;RO=179;RPL=9;RPP=3.0103;RPPR=3.60473;RPR=9;RUN=1;SAF=6;SAP=7.35324;SAR=12;SRF=98;SRP=6.5162;SRR=81;TYPE=snp;ANN=A
chr5B	684814699	A	T	ALT1	REF	missense_variant	MODERATE	TRIDC5BG077670	AB=0.396226;ABP=17.8828;AC=19;AF=0.0742188;AN=256;AO=81;CIGAR=1X;DP=1042;DPB=1042;DPRA=1.66623;EPP=17.1919;EPPR=33.9419;GTI=6;LEN=1;MEANALT=1;MQM=70;MQMR=69.667;NS=64;NUMALT=1;ODDS=0.440413;PAIRED=1;PAIREDR=1;PAO=0;PQA=0;PQR=0;PRO=0;QA=2905;QR=36208;RO=961;RPL=30;RPP=14.8328;RPPR=55.9052;RPR=51;RUN=1;SAF=58;SAP=35.8505;SAR=23;SRF=517;SRP=15.0517;SRR=444;TYPE=snp;ANN=T
chr5B	684815757	CGT	CGC	REF	ALT1	missense_variant	MODERATE	TRIDC5BG077670	AB=0.603406;ABP=79.3553;AC=188;AF=0.734375;AN=256;AO=853;CIGAR=2M1X;DP=1260;DPB=1293;DPRA=1.9132;EPP=4.35697;EPPR=3.35601;GTI=14;LEN=1;MEANALT=1.07018;MQM=69.8429;MQMR=59.9279;NS=64;NUMALT=1;ODDS=0.157769;PAIRED=1;PAIREDR=1;PAO=26.5;PQA=854.5;PQR=1049.5;PRO=33.5;QA=30927;QR=14281;RO=402;RPL=333;RPP=92.0305;RPPR=32.5899;RPR=520;RUN=1;SAF=536;SAP=125.104;SAR=317;SRF=289;SRP=170.333;SRR=113;TYPE=snp…
chr5B	684818004	ACGC	GCGT,GCGC	ALT1	REF	intron_variant	MODIFIER	TRIDC5BG077670	AB=0.277778,0.375;ABP=10.7311,5.18177;AC=22,11;AF=0.107843,0.0539216;AN=204;AO=9,7;CIGAR=1X2M1X,1X3M;DP=117;DPB=121.25;DPRA=1.29217,1.38372;EPP=22.5536,18.2106;EPPR=63.403;GTI=15;LEN=4,1;MEANALT=1.125,1.16667;MQM=37.6667,24.4286;MQMR=58.2475;NS=51;NUMALT=2;ODDS=5.4262;PAIRED=1,1;PAIREDR=1;PAO=0,4;PQA=0,63;PQR=63;PRO=4;QA=331,171;QR=3608;RO=101;RPL=0,0;RPP=22.5536,18.2106;RPPR=105.37;RPR=9,7;RUN=1…
chr5B	684818024	G	C	ALT1	REF	intron_variant	MODIFIER	TRIDC5BG077670	AB=0.263158;ABP=21.525;AC=19;AF=0.0863636;AN=220;AO=12;CIGAR=1X;DP=180;DPB=180;DPRA=1.28571;EPP=29.068;EPPR=14.6432;GTI=10;LEN=1;MEANALT=1;MQM=43.0833;MQMR=52.994;NS=55;NUMALT=1;ODDS=5.29125;PAIRED=1;PAIREDR=1;PAO=0;PQA=0;PQR=0;PRO=0;QA=444;QR=5849;RO=168;RPL=0;RPP=29.068;RPPR=148.24;RPR=12;RUN=1;SAF=12;SAP=29.068;SAR=0;SRF=130;SRP=112.411;SRR=38;TYPE=snp;ANN=C
chr5B	684818037	C	T	ALT1	REF	intron_variant	MODIFIER	TRIDC5BG077670	AB=0.410853;ABP=11.915;AC=116;AF=0.508772;AN=228;AO=91;CIGAR=1X;DP=195;DPB=195;DPRA=1.76292;EPP=39.3049;EPPR=51.1168;GTI=21;LEN=1;MEANALT=1;MQM=35.6923;MQMR=68.0577;NS=57;NUMALT=1;ODDS=63.8685;PAIRED=1;PAIREDR=1;PAO=0;PQA=0;PQR=0;PRO=0;QA=3160;QR=3574;RO=104;RPL=16;RPP=86.0751;RPPR=27.1471;RPR=75;RUN=1;SAF=81;SAP=123.3;SAR=10;SRF=63;SRP=13.116;SRR=41;TYPE=snp;ANN=T
chr5B	684818051	C	T	ALT1	REF	intron_variant	MODIFIER	TRIDC5BG077670	AB=0.3;ABP=20.3821;AC=19;AF=0.0833333;AN=228;AO=17;CIGAR=1X;DP=238;DPB=238;DPRA=1.16911;EPP=4.1599;EPPR=140.445;GTI=7;LEN=1;MEANALT=1;MQM=41.5882;MQMR=52.0136;NS=57;NUMALT=1;ODDS=0.033611;PAIRED=1;PAIREDR=1;PAO=0;PQA=0;PQR=0;PRO=0;QA=583;QR=7481;RO=220;RPL=6;RPP=6.20364;RPPR=27.6861;RPR=11;RUN=1;SAF=13;SAP=13.3567;SAR=4;SRF=126;SRP=13.1175;SRR=94;TYPE=snp;ANN=T
chr5B	684818069	G	A	ALT1	REF	intron_variant	MODIFIER	TRIDC5BG077670	AB=0.333333;ABP=20.3821;AC=28;AF=0.12069;AN=232;AO=27;CIGAR=1X;DP=258;DPB=258;DPRA=1.28806;EPP=32.0437;EPPR=223.062;GTI=13;LEN=1;MEANALT=1;MQM=40.5556;MQMR=51.1818;NS=58;NUMALT=1;ODDS=0.0954436;PAIRED=1;PAIREDR=1;PAO=0;PQA=0;PQR=0;PRO=0;QA=898;QR=7873;RO=231;RPL=12;RPP=3.73412;RPPR=6.40381;RPR=15;RUN=1;SAF=16;SAP=5.02092;SAR=11;SRF=106;SRP=6.40381;SRR=125;TYPE=snp;ANN=A
chr5B	684818086	ACG	ATG	ALT1	REF	intron_variant	MODIFIER	TRIDC5BG077670	AB=0.341463;ABP=20.9117;AC=32;AF=0.137931;AN=232;AO=36;CIGAR=1M1X1M;DP=233;DPB=237.333;DPRA=1.46401;EPP=81.1833;EPPR=31.9744;GTI=14;LEN=1;MEANALT=1.05263;MQM=36.6944;MQMR=53.4154;NS=58;NUMALT=1;ODDS=0.0233333;PAIRED=1;PAIREDR=1;PAO=1.66667;PQA=51.3333;PQR=197.333;PRO=6.66667;QA=1007;QR=6549;RO=195;RPL=15;RPP=5.18177;RPPR=83.4661;RPR=21;RUN=1;SAF=15;SAP=5.18177;SAR=21;SRF=72;SRP=31.9744;SRR=123;TY…
chr5B	684818255	A	G	REF	ALT1	intron_variant	MODIFIER	TRIDC5BG077670	AB=0.666667;ABP=5.18177;AC=48;AF=0.666667;AN=72;AO=18;CIGAR=1X;DP=27;DPB=27;DPRA=1.34615;EPP=15.074;EPPR=5.18177;GTI=8;LEN=1;MEANALT=1;MQM=37.0556;MQMR=50.3333;NS=18;NUMALT=1;ODDS=0.21013;PAIRED=1;PAIREDR=1;PAO=0;PQA=0;PQR=0;PRO=0;QA=643;QR=318;RO=9;RPL=9;RPP=3.0103;RPPR=3.25157;RPR=9;RUN=1;SAF=13;SAP=10.7311;SAR=5;SRF=5;SRP=3.25157;SRR=4;TYPE=snp;ANN=G
chr5B	684818310	G	T	REF	ALT1	intron_variant	MODIFIER	TRIDC5BG077670	AB=0.428571;ABP=3.32051;AC=21;AF=0.291667;AN=72;AO=8;CIGAR=1X;DP=28;DPB=28;DPRA=1.17857;EPP=3.0103;EPPR=4.74748;GTI=9;LEN=1;MEANALT=1;MQM=36.75;MQMR=40.7;NS=18;NUMALT=1;ODDS=2.71699;PAIRED=1;PAIREDR=1;PAO=0;PQA=0;PQR=0;PRO=0;QA=284;QR=721;RO=20;RPL=5;RPP=4.09604;RPPR=3.44459;RPR=3;RUN=1;SAF=3;SAP=4.09604;SAR=5;SRF=11;SRP=3.44459;SRR=9;TYPE=snp;ANN=T
chr5B	684820442	G	A	ALT1	REF	intron_variant	MODIFIER	TRIDC5BG077670	AB=0.6;ABP=9.09042;AC=103;AF=0.628049;AN=164;AO=63;CIGAR=1X;DP=103;DPB=103;DPRA=2.13281;EPP=139.813;EPPR=16.2152;GTI=25;LEN=1;MEANALT=1.0625;MQM=26.0476;MQMR=55.1351;NS=41;NUMALT=1;ODDS=0.00183331;PAIRED=1;PAIREDR=1;PAO=0;PQA=0;PQR=0;PRO=0;QA=2448;QR=1383;RO=37;RPL=0;RPP=139.813;RPPR=10.1116;RPR=63;RUN=1;SAF=63;SAP=139.813;SAR=0;SRF=31;SRP=39.6906;SRR=6;TYPE=snp;ANN=A
chr5B	684820450	C	T	ALT1	REF	intron_variant	MODIFIER	TRIDC5BG077670	AB=0.578313;ABP=7.43173;AC=106;AF=0.616279;AN=172;AO=70;CIGAR=1X;DP=118;DPB=118;DPRA=2.13801;EPP=155.013;EPPR=29.068;GTI=24;LEN=1;MEANALT=1;MQM=26.8571;MQMR=51.0417;NS=43;NUMALT=1;ODDS=0.175288;PAIRED=1;PAIREDR=1;PAO=0;PQA=0;PQR=0;PRO=0;QA=2792;QR=1784;RO=48;RPL=0;RPP=155.013;RPPR=24.906;RPR=70;RUN=1;SAF=70;SAP=155.013;SAR=0;SRF=43;SRP=68.3354;SRR=5;TYPE=snp;ANN=T
chr5B	684820463	C	T	ALT1	REF	intron_variant	MODIFIER	TRIDC5BG077670	AB=0.6;ABP=14.302;AC=125;AF=0.637755;AN=196;AO=110;CIGAR=1X;DP=173;DPB=173;DPRA=3.31364;EPP=155.882;EPPR=21.2438;GTI=24;LEN=1;MEANALT=1;MQM=29.5273;MQMR=53.5873;NS=49;NUMALT=1;ODDS=0.434654;PAIRED=1;PAIREDR=1;PAO=0;PQA=0;PQR=0;PRO=0;QA=4335;QR=2374;RO=63;RPL=11;RPP=155.882;RPPR=24.5527;RPR=99;RUN=1;SAF=110;SAP=241.872;SAR=0;SRF=58;SRP=99.8304;SRR=5;TYPE=snp;ANN=T
chr5B	684820961	G	A	ALT1	REF	intron_variant	MODIFIER	TRIDC5BG077670	AB=0.572559;ABP=20.342;AC=103;AF=0.443966;AN=232;AO=244;CIGAR=1X;DP=444;DPB=444;DPRA=6.43966;EPP=9.02635;EPPR=22.1627;GTI=25;LEN=1;MEANALT=1;MQM=21.8361;MQMR=70;NS=58;NUMALT=1;ODDS=10.1327;PAIRED=1;PAIREDR=1;PAO=0;PQA=0;PQR=0;PRO=0;QA=7411;QR=7002;RO=200;RPL=7;RPP=473.793;RPPR=3.05373;RPR=237;RUN=1;SAF=104;SAP=14.544;SAR=140;SRF=92;SRP=5.78978;SRR=108;TYPE=snp;ANN=A
chr5B	684821536	A	G	ALT1	REF	5_prime_UTR_variant	MODIFIER	TRIDC5BG077670	AB=0.348837;ABP=28.6135;AC=54;AF=0.241071;AN=224;AO=55;CIGAR=1X;DP=200;DPB=200;DPRA=2.62926;EPP=9.68264;EPPR=6.37983;GTI=27;LEN=1;MEANALT=1;MQM=27.5636;MQMR=65.1517;NS=56;NUMALT=1;ODDS=0.0576223;PAIRED=1;PAIREDR=1;PAO=0;PQA=0;PQR=0;PRO=0;QA=2039;QR=5364;RO=145;RPL=35;RPP=11.8936;RPPR=4.82236;RPR=20;RUN=1;SAF=13;SAP=36.2141;SAR=42;SRF=41;SRP=62.4487;SRR=104;TYPE=snp;ANN=G
chr5B	684821571	A	G	REF	ALT1	5_prime_UTR_variant	MODIFIER	TRIDC5BG077670	AB=0.731183;ABP=46.1829;AC=192;AF=0.872727;AN=220;AO=144;CIGAR=1X;DP=172;DPB=172;DPRA=2.12579;EPP=4.51827;EPPR=28.1373;GTI=14;LEN=1;MEANALT=1;MQM=55.8958;MQMR=38.5;NS=55;NUMALT=1;ODDS=0.405595;PAIRED=1;PAIREDR=1;PAO=0;PQA=0;PQR=0;PRO=0;QA=5527;QR=1041;RO=28;RPL=80;RPP=6.8707;RPPR=10.7656;RPR=64;RUN=1;SAF=35;SAP=85.5866;SAR=109;SRF=6;SRP=22.8638;SRR=22;TYPE=snp;ANN=G
chr5B	684822979	T	C	REF	ALT1	intron_variant	MODIFIER	TRIDC5BG077670	AB=0.543478;ABP=13.5844;AC=189;AF=0.738281;AN=256;AO=743;CIGAR=1X;DP=1119;DPB=1119;DPRA=0.843089;EPP=11.8511;EPPR=15.296;GTI=8;LEN=1;MEANALT=1.03333;MQM=69.961;MQMR=53.9706;NS=64;NUMALT=1;ODDS=0.0063508;PAIRED=1;PAIREDR=1;PAO=0;PQA=0;PQR=0;PRO=0;QA=28384;QR=14210;RO=374;RPL=387;RPP=5.81889;RPPR=52.1529;RPR=356;RUN=1;SAF=240;SAP=205.162;SAR=503;SRF=73;SRP=304.833;SRR=301;TYPE=snp;ANN=C
